# Supplementary material for: Genome-wide association study reveals genetic basis and candidate genes for chlorophyll content of leaves in maize (Zea mays L.)
Source: PeerJ journal article supplement (doi:10.7717/peerj.18278), 2024-10-07
Supplement: Supplementary_Files.zip [file Supplementary_Files.zip]

## Sheet: Supplemental Table S4.vcf
Table S6. Variations of eight hub candidate genes.
Chromosome	Position	Markers	REF	ALT	INFO	SCL002	SCL008	SCL009	SCL010	SCL011	SCL016	SCL017	SCL018	SCL023	SCL024	SCL026	SCL027	SCL047	SCL056	SCL060	SCL065	SCL066	SCL068	SCL077	SCL081	SCL082	SCL083	SCL084	SCL089	SCL091	SCL092	SCL095	SCL096	SCL097	SCL098	SCL104	SCL106	SCL107	SCL108	SCL109	SCL110	SCL111	SCL113	SCL114	SCL115	SCL117	SCL118	SCL119	SCL122
1	269339516	SNP-1-269339516	G	C	AC=24;AF=0.158;AN=152;BaseQRankSum=0.524;CSQ=C|downstream_gene_variant|MODIFIER||Zm00001d033636|Transcript|Zm00001d033636_T001|protein_coding|||||||||||1167|1|||,C|synonymous_variant|LOW||Zm00001d033637|Transcript|Zm00001d033637_T001|protein_coding|1/1||||765|765|255|L|ctC/ctG|||-1|||,C|upstream_gene_variant|MODIFIER||Zm00001d033638|Transcript|Zm00001d033638_T001|tRNA|||||||||||1327|1|||;DP=316;E…	0/0	0/0	./.	1/1	0/0	./.	0/0	0/0	0/0	0/1	0/1	1/1	1/1	0/0	0/0	0/0	0/0	0/0	0/0	0/0	0/0	0/0	1/1	0/0	0/0	0/0	0/0	./.	0/0	1/1	0/0	0/0	1/1	0/0	0/0	0/0	0/0	0/0	0/0	0/0	0/0	0/0	1/1	0/0
1	269339581	SNP-1-269339581	C	T	AC=34;AF=0.23;AN=148;CSQ=T|downstream_gene_variant|MODIFIER||Zm00001d033636|Transcript|Zm00001d033636_T001|protein_coding|||||||||||1232|1|||,T|missense_variant|MODERATE||Zm00001d033637|Transcript|Zm00001d033637_T001|protein_coding|1/1||||700|700|234|A/T|Gcc/Acc|||-1|||,T|upstream_gene_variant|MODIFIER||Zm00001d033638|Transcript|Zm00001d033638_T001|tRNA|||||||||||1262|1|||;DP=309;ExcessHet=0;FS=0…	1/1	0/0	0/0	0/0	1/1	./.	0/0	0/0	0/0	0/0	0/0	0/0	0/0	0/0	0/0	1/1	./.	1/1	0/0	./.	0/0	0/0	0/0	0/0	0/0	1/1	1/1	0/0	0/0	0/0	0/0	0/0	0/0	./.	0/0	0/0	0/0	0/0	1/1	1/1	1/1	0/0	0/0	0/0
1	269339684	SNP-1-269339684	G	C	AC=10;AF=0.064;AN=156;CSQ=C|downstream_gene_variant|MODIFIER||Zm00001d033636|Transcript|Zm00001d033636_T001|protein_coding|||||||||||1335|1|||,C|synonymous_variant|LOW||Zm00001d033637|Transcript|Zm00001d033637_T001|protein_coding|1/1||||597|597|199|G|ggC/ggG|||-1|||,C|upstream_gene_variant|MODIFIER||Zm00001d033638|Transcript|Zm00001d033638_T001|tRNA|||||||||||1159|1|||;DP=332;ExcessHet=0;FS=0;Inb…	1/1	0/0	0/0	0/0	0/0	0/0	1/1	0/0	./.	0/0	0/0	0/0	./.	0/0	0/0	1/1	0/0	0/0	0/0	0/0	0/0	0/0	0/0	0/0	0/0	0/0	0/0	0/0	0/0	0/0	0/0	0/0	0/0	0/0	0/0	0/0	0/0	0/0	0/0	0/0	0/0	0/0	0/0	0/0
1	269339768	SNP-1-269339768	C	G	AC=76;AF=0.5;AN=152;BaseQRankSum=0.674;CSQ=G|downstream_gene_variant|MODIFIER||Zm00001d033636|Transcript|Zm00001d033636_T001|protein_coding|||||||||||1419|1|||,G|synonymous_variant|LOW||Zm00001d033637|Transcript|Zm00001d033637_T001|protein_coding|1/1||||513|513|171|R|cgG/cgC|||-1|||,G|upstream_gene_variant|MODIFIER||Zm00001d033638|Transcript|Zm00001d033638_T001|tRNA|||||||||||1075|1|||,G|downstre…	0/0	1/1	1/1	1/1	1/1	1/1	1/1	0/0	./.	0/1	0/1	1/1	1/1	0/0	0/0	0/0	1/1	1/1	0/0	1/1	0/0	1/1	1/1	0/0	0/0	1/1	1/1	0/0	0/0	1/1	0/0	0/0	1/1	0/0	0/0	0/0	0/0	0/0	1/1	1/1	1/1	0/0	1/1	0/0
1	269339798	SNP-1-269339798	C	G	AC=68;AF=0.447;AN=152;BaseQRankSum=0.967;CSQ=G|downstream_gene_variant|MODIFIER||Zm00001d033636|Transcript|Zm00001d033636_T001|protein_coding|||||||||||1449|1|||,G|synonymous_variant|LOW||Zm00001d033637|Transcript|Zm00001d033637_T001|protein_coding|1/1||||483|483|161|V|gtG/gtC|||-1|||,G|upstream_gene_variant|MODIFIER||Zm00001d033638|Transcript|Zm00001d033638_T001|tRNA|||||||||||1045|1|||,G|downst…	1/1	1/1	1/1	1/1	1/1	0/0	1/1	0/0	1/1	0/1	0/1	1/1	1/1	0/0	0/0	1/1	0/0	1/1	0/0	./.	0/0	./.	1/1	0/0	0/0	1/1	1/1	0/0	0/0	1/1	0/0	0/0	1/1	1/1	0/0	0/0	0/0	0/0	1/1	0/0	0/0	0/0	1/1	0/0
1	269340061	SNP-1-269340061	C	A	AC=16;AF=0.105;AN=152;CSQ=A|downstream_gene_variant|MODIFIER||Zm00001d033636|Transcript|Zm00001d033636_T001|protein_coding|||||||||||1712|1|||,A|missense_variant|MODERATE||Zm00001d033637|Transcript|Zm00001d033637_T001|protein_coding|1/1||||220|220|74|A/S|Gcc/Tcc|||-1|||,A|upstream_gene_variant|MODIFIER||Zm00001d033638|Transcript|Zm00001d033638_T001|tRNA|||||||||||782|1|||,A|downstream_gene_varian…	0/0	0/0	0/0	./.	0/0	0/0	0/0	0/0	0/0	0/0	0/0	1/1	1/1	0/0	0/0	0/0	0/0	0/0	0/0	0/0	0/0	0/0	1/1	0/0	0/0	0/0	0/0	0/0	0/0	1/1	0/0	0/0	./.	0/0	0/0	0/0	0/0	0/0	0/0	0/0	0/0	0/0	0/0	./.
1	269340113	SNP-1-269340113	G	A	AC=14;AF=0.09;AN=156;CSQ=A|downstream_gene_variant|MODIFIER||Zm00001d033636|Transcript|Zm00001d033636_T001|protein_coding|||||||||||1764|1|||,A|synonymous_variant|LOW||Zm00001d033637|Transcript|Zm00001d033637_T001|protein_coding|1/1||||168|168|56|V|gtC/gtT|||-1|||,A|upstream_gene_variant|MODIFIER||Zm00001d033638|Transcript|Zm00001d033638_T001|tRNA|||||||||||730|1|||,A|downstream_gene_variant|MODI…	0/0	1/1	./.	0/0	1/1	0/0	0/0	0/0	1/1	0/0	0/0	0/0	0/0	0/0	0/0	0/0	0/0	0/0	0/0	0/0	0/0	1/1	0/0	0/0	0/0	0/0	0/0	0/0	0/0	0/0	0/0	0/0	0/0	0/0	0/0	0/0	0/0	0/0	0/0	0/0	0/0	0/0	0/0	0/0
1	269340162	SNP-1-269340162	G	A	AC=8;AF=0.052;AN=154;CSQ=A|downstream_gene_variant|MODIFIER||Zm00001d033636|Transcript|Zm00001d033636_T001|protein_coding|||||||||||1813|1|||,A|missense_variant|MODERATE||Zm00001d033637|Transcript|Zm00001d033637_T001|protein_coding|1/1||||119|119|40|A/V|gCc/gTc|||-1|||,A|upstream_gene_variant|MODIFIER||Zm00001d033638|Transcript|Zm00001d033638_T001|tRNA|||||||||||681|1|||,A|downstream_gene_variant…	0/0	0/0	0/0	0/0	0/0	0/0	0/0	0/0	0/0	0/0	0/0	0/0	0/0	0/0	0/0	0/0	0/0	0/0	0/0	0/0	0/0	0/0	0/0	0/0	0/0	0/0	0/0	1/1	0/0	0/0	0/0	0/0	0/0	0/0	0/0	0/0	0/0	1/1	0/0	0/0	0/0	0/0	0/0	0/0
1	269340169	SNP-1-269340169	C	T	AC=8;AF=0.051;AN=156;CSQ=T|downstream_gene_variant|MODIFIER||Zm00001d033636|Transcript|Zm00001d033636_T001|protein_coding|||||||||||1820|1|||,T|missense_variant|MODERATE||Zm00001d033637|Transcript|Zm00001d033637_T001|protein_coding|1/1||||112|112|38|A/T|Gcg/Acg|||-1|||,T|upstream_gene_variant|MODIFIER||Zm00001d033638|Transcript|Zm00001d033638_T001|tRNA|||||||||||674|1|||,T|downstream_gene_variant…	0/0	0/0	0/0	0/0	0/0	0/0	0/0	0/0	0/0	0/0	0/0	0/0	0/0	0/0	0/0	0/0	0/0	0/0	0/0	0/0	0/0	0/0	0/0	0/0	0/0	0/0	0/0	1/1	0/0	0/0	0/0	0/0	0/0	0/0	0/0	0/0	0/0	1/1	0/0	0/0	0/0	0/0	0/0	0/0
1	269340370	SNP-1-269340370	G	C	AC=64;AF=0.41;AN=156;CSQ=C|upstream_gene_variant|MODIFIER||Zm00001d033637|Transcript|Zm00001d033637_T001|protein_coding|||||||||||90|-1|||,C|upstream_gene_variant|MODIFIER||Zm00001d033638|Transcript|Zm00001d033638_T001|tRNA|||||||||||473|1|||,C|downstream_gene_variant|MODIFIER||Zm00001d033639|Transcript|Zm00001d033639_T001|tRNA|||||||||||1363|-1|||;DP=315;ExcessHet=0;FS=0;InbreedingCoeff=0.6874;M…	1/1	1/1	1/1	0/0	1/1	1/1	1/1	0/0	1/1	1/1	0/0	./.	1/1	0/0	0/0	1/1	1/1	0/0	0/0	0/0	0/0	1/1	1/1	0/0	0/0	0/0	0/0	1/1	0/0	1/1	0/0	0/0	1/1	1/1	0/0	0/0	0/0	1/1	0/0	1/1	1/1	0/0	0/0	0/0
1	269340376	SNP-1-269340376	T	G	AC=80;AF=0.513;AN=156;CSQ=G|upstream_gene_variant|MODIFIER||Zm00001d033637|Transcript|Zm00001d033637_T001|protein_coding|||||||||||96|-1|||,G|upstream_gene_variant|MODIFIER||Zm00001d033638|Transcript|Zm00001d033638_T001|tRNA|||||||||||467|1|||,G|downstream_gene_variant|MODIFIER||Zm00001d033639|Transcript|Zm00001d033639_T001|tRNA|||||||||||1357|-1|||;DP=313;ExcessHet=0;FS=0;InbreedingCoeff=0.7004;…	1/1	1/1	1/1	0/0	1/1	1/1	1/1	0/0	1/1	1/1	1/1	./.	1/1	1/1	0/0	1/1	1/1	0/0	0/0	0/0	0/0	1/1	1/1	1/1	1/1	0/0	0/0	1/1	0/0	1/1	0/0	0/0	1/1	1/1	0/0	0/0	0/0	1/1	0/0	1/1	1/1	0/0	0/0	1/1
1	269340420	INS-1-269340420	T	TGGGTTG	AC=70;AF=0.479;AN=146;CSQ=GGGTTG|upstream_gene_variant|MODIFIER||Zm00001d033637|Transcript|Zm00001d033637_T001|protein_coding|||||||||||140|-1|||,GGGTTG|upstream_gene_variant|MODIFIER||Zm00001d033638|Transcript|Zm00001d033638_T001|tRNA|||||||||||422|1|||,GGGTTG|downstream_gene_variant|MODIFIER||Zm00001d033639|Transcript|Zm00001d033639_T001|tRNA|||||||||||1312|-1|||;DP=317;ExcessHet=0;FS=0;Inbreed…	1/1	1/1	1/1	0/0	1/1	1/1	1/1	0/0	./.	1/1	./.	1/1	1/1	1/1	0/0	1/1	1/1	0/0	0/0	0/0	0/0	1/1	1/1	1/1	1/1	0/0	0/0	1/1	0/0	1/1	0/0	0/0	./.	./.	0/0	0/0	0/0	1/1	0/0	1/1	1/1	0/0	1/1	1/1
1	269340469	SNP-1-269340469	C	T	AC=12;AF=0.079;AN=152;CSQ=T|upstream_gene_variant|MODIFIER||Zm00001d033637|Transcript|Zm00001d033637_T001|protein_coding|||||||||||189|-1|||,T|upstream_gene_variant|MODIFIER||Zm00001d033638|Transcript|Zm00001d033638_T001|tRNA|||||||||||374|1|||,T|downstream_gene_variant|MODIFIER||Zm00001d033639|Transcript|Zm00001d033639_T001|tRNA|||||||||||1264|-1|||;DP=266;ExcessHet=0;FS=0;InbreedingCoeff=0.4354…	0/0	0/0	0/0	0/0	0/0	0/0	0/0	0/0	0/0	0/0	0/0	0/0	0/0	1/1	0/0	0/0	0/0	0/0	0/0	0/0	0/0	0/0	0/0	1/1	1/1	0/0	0/0	0/0	0/0	0/0	0/0	0/0	0/0	./.	0/0	0/0	0/0	0/0	0/0	0/0	0/0	0/0	0/0	1/1
1	269342178	INS-1-269342178	G	GGA	AC=10;AF=0.075;AN=134;CSQ=GA|upstream_gene_variant|MODIFIER||Zm00001d033637|Transcript|Zm00001d033637_T001|protein_coding|||||||||||1898|-1|||,GA|downstream_gene_variant|MODIFIER||Zm00001d033638|Transcript|Zm00001d033638_T001|tRNA|||||||||||1263|1|||,GA|upstream_gene_variant|MODIFIER||Zm00001d033639|Transcript|Zm00001d033639_T001|tRNA|||||||||||373|-1|||,GA|downstream_gene_variant|MODIFIER||Zm000…	0/0	./.	./.	0/0	0/0	0/0	./.	0/0	0/0	0/0	0/0	0/0	0/0	1/1	0/0	0/0	0/0	0/0	0/0	0/0	0/0	0/0	0/0	1/1	1/1	0/0	0/0	./.	0/0	./.	0/0	0/0	0/0	0/0	0/0	0/0	0/0	0/0	0/0	./.	0/0	0/0	0/0	0/0
1	269395097	DEL-1-269395097	ATGGAATTCAAGTCACAATAG	A	AC=16;AF=0.103;AN=156;CSQ=-|3_prime_UTR_variant|MODIFIER|ethylene%20receptor1-25|Zm00001d033642|Transcript|Zm00001d033642_T001|protein_coding|7/7||||2328-2347|||||||-1||MaizeGDB|,-|3_prime_UTR_variant|MODIFIER|ethylene%20receptor1-25|Zm00001d033642|Transcript|Zm00001d033642_T003|protein_coding|5/5||||3459-3478|||||||-1||MaizeGDB|,-|3_prime_UTR_variant|MODIFIER|ethylene%20receptor1-25|Zm00001d0336…	0/0	0/0	0/0	0/0	0/0	0/0	1/1	0/0	0/0	0/0	0/0	0/0	0/0	1/1	0/0	0/0	0/0	0/0	./.	0/0	0/0	0/0	0/0	./.	1/1	0/0	0/0	0/0	0/0	0/0	0/0	0/0	0/0	0/0	0/0	0/0	0/0	0/0	0/0	0/0	0/0	0/0	0/0	1/1
1	269395129	SNP-1-269395129	A	C	AC=12;AF=0.077;AN=156;CSQ=C|splice_acceptor_variant|HIGH|ethylene%20receptor1-25|Zm00001d033642|Transcript|Zm00001d033642_T001|protein_coding||6/6||||||||||-1||MaizeGDB|,C|splice_acceptor_variant|HIGH|ethylene%20receptor1-25|Zm00001d033642|Transcript|Zm00001d033642_T003|protein_coding||4/4||||||||||-1||MaizeGDB|,C|splice_acceptor_variant|HIGH|ethylene%20receptor1-25|Zm00001d033642|Transcript|Zm00…	0/0	0/0	0/0	0/0	0/0	1/1	0/0	0/0	0/0	0/0	0/0	0/0	0/0	0/0	0/0	0/0	1/1	0/0	./.	0/0	0/0	0/0	0/0	0/0	0/0	0/0	0/0	0/0	0/0	0/0	0/0	0/0	0/0	0/0	0/0	0/0	0/0	0/0	0/0	1/1	1/1	0/0	0/0	0/0
1	269395148	SNP-1-269395148	G	T	AC=16;AF=0.103;AN=156;CSQ=T|splice_region_variant&3_prime_UTR_variant|LOW|ethylene%20receptor1-25|Zm00001d033642|Transcript|Zm00001d033642_T001|protein_coding|6/7||||2317|||||||-1||MaizeGDB|,T|splice_region_variant&3_prime_UTR_variant|LOW|ethylene%20receptor1-25|Zm00001d033642|Transcript|Zm00001d033642_T003|protein_coding|4/5||||3448|||||||-1||MaizeGDB|,T|splice_region_variant&3_prime_UTR_variant…	0/0	0/0	0/0	0/0	0/0	0/0	1/1	0/0	0/0	0/0	0/0	0/0	0/0	1/1	0/0	0/0	0/0	0/0	./.	0/0	0/0	0/0	0/0	./.	1/1	0/0	0/0	0/0	0/0	0/0	0/0	0/0	0/0	0/0	0/0	0/0	0/0	0/0	0/0	0/0	0/0	0/0	0/0	1/1
1	269395149	SNP-1-269395149	G	T	AC=16;AF=0.103;AN=156;CSQ=T|splice_region_variant&3_prime_UTR_variant|LOW|ethylene%20receptor1-25|Zm00001d033642|Transcript|Zm00001d033642_T001|protein_coding|6/7||||2316|||||||-1||MaizeGDB|,T|splice_region_variant&3_prime_UTR_variant|LOW|ethylene%20receptor1-25|Zm00001d033642|Transcript|Zm00001d033642_T003|protein_coding|4/5||||3447|||||||-1||MaizeGDB|,T|splice_region_variant&3_prime_UTR_variant…	0/0	0/0	0/0	0/0	0/0	0/0	1/1	0/0	0/0	0/0	0/0	0/0	0/0	1/1	0/0	0/0	0/0	0/0	./.	0/0	0/0	0/0	0/0	./.	1/1	0/0	0/0	0/0	0/0	0/0	0/0	0/0	0/0	0/0	0/0	0/0	0/0	0/0	0/0	0/0	0/0	0/0	0/0	1/1
1	269395251	SNP-1-269395251	G	C	AC=12;AF=0.076;AN=158;CSQ=C|3_prime_UTR_variant|MODIFIER|ethylene%20receptor1-25|Zm00001d033642|Transcript|Zm00001d033642_T001|protein_coding|6/7||||2214|||||||-1||MaizeGDB|,C|3_prime_UTR_variant|MODIFIER|ethylene%20receptor1-25|Zm00001d033642|Transcript|Zm00001d033642_T003|protein_coding|4/5||||3345|||||||-1||MaizeGDB|,C|3_prime_UTR_variant|MODIFIER|ethylene%20receptor1-25|Zm00001d033642|Transcr…	0/0	0/0	0/0	0/0	0/0	1/1	0/0	0/0	0/0	0/0	0/0	0/0	0/0	0/0	0/0	0/0	1/1	0/0	0/0	0/0	0/0	0/0	0/0	0/0	0/0	0/0	0/0	0/0	0/0	0/0	0/0	0/0	0/0	0/0	0/0	0/0	0/0	0/0	0/0	1/1	./.	0/0	0/0	0/0
1	269395394	SNP-1-269395394	G	A	AC=12;AF=0.077;AN=156;CSQ=A|synonymous_variant|LOW|ethylene%20receptor1-25|Zm00001d033642|Transcript|Zm00001d033642_T001|protein_coding|6/7||||2071|1890|630|Y|taC/taT|||-1||MaizeGDB|,A|3_prime_UTR_variant|MODIFIER|ethylene%20receptor1-25|Zm00001d033642|Transcript|Zm00001d033642_T003|protein_coding|4/5||||3202|||||||-1||MaizeGDB|,A|synonymous_variant|LOW|ethylene%20receptor1-25|Zm00001d033642|Tran…	0/0	0/0	0/0	0/0	0/0	1/1	0/0	0/0	0/0	0/0	0/0	0/0	0/0	./.	0/0	0/0	1/1	0/0	0/0	0/0	0/0	0/0	0/0	0/0	0/0	0/0	0/0	0/0	0/0	0/0	0/0	0/0	0/0	0/0	0/0	0/0	0/0	0/0	0/0	1/1	1/1	0/0	0/0	0/0
1	269395400	SNP-1-269395400	A	G	AC=13;AF=0.086;AN=152;BaseQRankSum=2.03;CSQ=G|synonymous_variant|LOW|ethylene%20receptor1-25|Zm00001d033642|Transcript|Zm00001d033642_T001|protein_coding|6/7||||2065|1884|628|S|tcT/tcC|||-1||MaizeGDB|,G|3_prime_UTR_variant|MODIFIER|ethylene%20receptor1-25|Zm00001d033642|Transcript|Zm00001d033642_T003|protein_coding|4/5||||3196|||||||-1||MaizeGDB|,G|synonymous_variant|LOW|ethylene%20receptor1-25|Z…	0/0	0/0	0/0	0/0	0/0	0/0	1/1	0/0	0/0	0/0	0/1	0/0	0/0	./.	0/0	0/0	0/0	0/0	0/0	0/0	0/0	0/0	0/0	./.	1/1	0/0	0/0	0/0	0/0	0/0	0/0	0/0	0/0	0/0	0/0	0/0	0/0	0/0	0/0	0/0	0/0	0/0	0/0	1/1
1	269395412	SNP-1-269395412	A	T	AC=13;AF=0.087;AN=150;BaseQRankSum=-2.655;CSQ=T|synonymous_variant|LOW|ethylene%20receptor1-25|Zm00001d033642|Transcript|Zm00001d033642_T001|protein_coding|6/7||||2053|1872|624|T|acT/acA|||-1||MaizeGDB|,T|3_prime_UTR_variant|MODIFIER|ethylene%20receptor1-25|Zm00001d033642|Transcript|Zm00001d033642_T003|protein_coding|4/5||||3184|||||||-1||MaizeGDB|,T|synonymous_variant|LOW|ethylene%20receptor1-25…	0/0	0/0	0/0	0/0	0/0	0/0	1/1	0/0	0/0	0/0	0/1	0/0	0/0	./.	0/0	0/0	0/0	0/0	0/0	./.	0/0	0/0	0/0	./.	1/1	0/0	0/0	0/0	0/0	0/0	0/0	0/0	0/0	0/0	0/0	0/0	0/0	0/0	0/0	0/0	0/0	0/0	0/0	1/1
1	269395415	SNP-1-269395415	A	G	AC=14;AF=0.092;AN=152;CSQ=G|synonymous_variant|LOW|ethylene%20receptor1-25|Zm00001d033642|Transcript|Zm00001d033642_T001|protein_coding|6/7||||2050|1869|623|S|tcT/tcC|||-1||MaizeGDB|,G|3_prime_UTR_variant|MODIFIER|ethylene%20receptor1-25|Zm00001d033642|Transcript|Zm00001d033642_T003|protein_coding|4/5||||3181|||||||-1||MaizeGDB|,G|synonymous_variant|LOW|ethylene%20receptor1-25|Zm00001d033642|Tran…	0/0	0/0	0/0	0/0	0/0	1/1	0/0	0/0	0/0	0/0	0/0	0/0	0/0	./.	0/0	0/0	1/1	0/0	0/0	./.	0/0	0/0	0/0	0/0	0/0	0/0	0/0	0/0	0/0	0/0	0/0	0/0	0/0	1/1	0/0	0/0	0/0	0/0	0/0	1/1	1/1	0/0	0/0	0/0
1	269395436	SNP-1-269395436	A	C	AC=31;AF=0.201;AN=154;BaseQRankSum=-1.255;CSQ=C|synonymous_variant|LOW|ethylene%20receptor1-25|Zm00001d033642|Transcript|Zm00001d033642_T001|protein_coding|6/7||||2029|1848|616|P|ccT/ccG|||-1||MaizeGDB|,C|3_prime_UTR_variant|MODIFIER|ethylene%20receptor1-25|Zm00001d033642|Transcript|Zm00001d033642_T003|protein_coding|4/5||||3160|||||||-1||MaizeGDB|,C|synonymous_variant|LOW|ethylene%20receptor1-25…	0/0	0/0	0/0	0/0	0/0	1/1	1/1	0/0	0/0	0/0	0/1	0/0	0/0	1/1	0/0	0/0	1/1	0/0	0/0	0/0	0/0	0/0	0/0	1/1	1/1	0/0	0/0	0/0	0/0	0/0	0/0	0/0	0/0	1/1	0/0	0/0	0/0	0/0	0/0	1/1	1/1	0/0	0/0	1/1
1	269395438	SNP-1-269395438	G	C	AC=31;AF=0.201;AN=154;BaseQRankSum=-1.309;CSQ=C|missense_variant|MODERATE|ethylene%20receptor1-25|Zm00001d033642|Transcript|Zm00001d033642_T001|protein_coding|6/7||||2027|1846|616|P/A|Cct/Gct|||-1||MaizeGDB|,C|3_prime_UTR_variant|MODIFIER|ethylene%20receptor1-25|Zm00001d033642|Transcript|Zm00001d033642_T003|protein_coding|4/5||||3158|||||||-1||MaizeGDB|,C|missense_variant|MODERATE|ethylene%20rece…	0/0	0/0	0/0	0/0	0/0	1/1	1/1	0/0	0/0	0/0	0/1	0/0	0/0	1/1	0/0	0/0	1/1	0/0	0/0	0/0	0/0	0/0	0/0	1/1	1/1	0/0	0/0	0/0	0/0	0/0	0/0	0/0	0/0	1/1	0/0	0/0	0/0	0/0	0/0	1/1	1/1	0/0	0/0	1/1
1	269395466	SNP-1-269395466	G	A	AC=31;AF=0.204;AN=152;BaseQRankSum=-1.409;CSQ=A|synonymous_variant|LOW|ethylene%20receptor1-25|Zm00001d033642|Transcript|Zm00001d033642_T001|protein_coding|6/7||||1999|1818|606|S|agC/agT|||-1||MaizeGDB|,A|3_prime_UTR_variant|MODIFIER|ethylene%20receptor1-25|Zm00001d033642|Transcript|Zm00001d033642_T003|protein_coding|4/5||||3130|||||||-1||MaizeGDB|,A|synonymous_variant|LOW|ethylene%20receptor1-25…	0/0	0/0	0/0	0/0	0/0	1/1	1/1	0/0	0/0	0/0	0/1	./.	0/0	1/1	0/0	0/0	1/1	0/0	0/0	0/0	0/0	./.	0/0	1/1	1/1	0/0	0/0	0/0	0/0	0/0	0/0	0/0	0/0	1/1	0/0	0/0	0/0	0/0	0/0	1/1	1/1	0/0	0/0	1/1
1	269395640	SNP-1-269395640	G	C	AC=14;AF=0.089;AN=158;CSQ=C|intron_variant|MODIFIER|ethylene%20receptor1-25|Zm00001d033642|Transcript|Zm00001d033642_T001|protein_coding||5/6||||||||||-1||MaizeGDB|,C|3_prime_UTR_variant|MODIFIER|ethylene%20receptor1-25|Zm00001d033642|Transcript|Zm00001d033642_T003|protein_coding|4/5||||2956|||||||-1||MaizeGDB|,C|intron_variant|MODIFIER|ethylene%20receptor1-25|Zm00001d033642|Transcript|Zm00001d03…	0/0	0/0	0/0	0/0	0/0	1/1	0/0	0/0	0/0	0/0	0/0	0/0	0/0	0/0	0/0	0/0	1/1	0/0	0/0	0/0	0/0	0/0	0/0	0/0	0/0	0/0	0/0	0/0	0/0	0/0	0/0	0/0	0/0	0/0	0/0	0/0	./.	0/0	0/0	1/1	1/1	0/0	0/0	0/0
1	269395664	SNP-1-269395664	A	G	AC=19;AF=0.122;AN=156;BaseQRankSum=1.98;CSQ=G|intron_variant|MODIFIER|ethylene%20receptor1-25|Zm00001d033642|Transcript|Zm00001d033642_T001|protein_coding||5/6||||||||||-1||MaizeGDB|,G|3_prime_UTR_variant|MODIFIER|ethylene%20receptor1-25|Zm00001d033642|Transcript|Zm00001d033642_T003|protein_coding|4/5||||2932|||||||-1||MaizeGDB|,G|intron_variant|MODIFIER|ethylene%20receptor1-25|Zm00001d033642|Tra…	0/0	0/0	0/0	0/0	0/0	0/0	1/1	0/0	0/0	0/0	0/1	0/0	0/0	1/1	0/0	0/0	0/0	0/0	0/0	0/0	0/0	0/0	0/0	1/1	1/1	0/0	0/0	0/0	0/0	./.	0/0	0/0	0/0	0/0	0/0	0/0	./.	0/0	0/0	0/0	0/0	0/0	0/0	1/1
1	269395673	SNP-1-269395673	T	G	AC=35;AF=0.222;AN=158;BaseQRankSum=1.47;CSQ=G|intron_variant|MODIFIER|ethylene%20receptor1-25|Zm00001d033642|Transcript|Zm00001d033642_T001|protein_coding||5/6||||||||||-1||MaizeGDB|,G|3_prime_UTR_variant|MODIFIER|ethylene%20receptor1-25|Zm00001d033642|Transcript|Zm00001d033642_T003|protein_coding|4/5||||2923|||||||-1||MaizeGDB|,G|intron_variant|MODIFIER|ethylene%20receptor1-25|Zm00001d033642|Tra…	0/0	0/0	0/0	0/0	0/0	1/1	1/1	0/0	0/0	0/0	0/1	0/0	0/0	1/1	0/0	0/0	1/1	0/0	0/0	0/0	0/0	0/0	0/0	1/1	1/1	0/0	0/0	0/0	0/0	./.	0/0	0/0	0/0	1/1	0/0	0/0	0/0	0/0	0/0	1/1	1/1	0/0	0/0	1/1
1	269395699	SNP-1-269395699	C	T	AC=35;AF=0.222;AN=158;BaseQRankSum=-1.834;CSQ=T|intron_variant|MODIFIER|ethylene%20receptor1-25|Zm00001d033642|Transcript|Zm00001d033642_T001|protein_coding||5/6||||||||||-1||MaizeGDB|,T|3_prime_UTR_variant|MODIFIER|ethylene%20receptor1-25|Zm00001d033642|Transcript|Zm00001d033642_T003|protein_coding|4/5||||2897|||||||-1||MaizeGDB|,T|intron_variant|MODIFIER|ethylene%20receptor1-25|Zm00001d033642|T…	0/0	0/0	0/0	0/0	0/0	1/1	1/1	0/0	0/0	0/0	0/1	0/0	0/0	1/1	0/0	0/0	1/1	0/0	0/0	0/0	0/0	0/0	0/0	1/1	1/1	0/0	0/0	0/0	0/0	./.	0/0	0/0	0/0	1/1	0/0	0/0	0/0	0/0	0/0	1/1	1/1	0/0	0/0	1/1
1	269395706	SNP-1-269395706	A	T	AC=14;AF=0.089;AN=158;CSQ=T|intron_variant|MODIFIER|ethylene%20receptor1-25|Zm00001d033642|Transcript|Zm00001d033642_T001|protein_coding||5/6||||||||||-1||MaizeGDB|,T|3_prime_UTR_variant|MODIFIER|ethylene%20receptor1-25|Zm00001d033642|Transcript|Zm00001d033642_T003|protein_coding|4/5||||2890|||||||-1||MaizeGDB|,T|intron_variant|MODIFIER|ethylene%20receptor1-25|Zm00001d033642|Transcript|Zm00001d03…	0/0	0/0	0/0	0/0	0/0	1/1	0/0	0/0	0/0	0/0	0/0	0/0	0/0	0/0	0/0	0/0	1/1	0/0	0/0	0/0	0/0	0/0	0/0	0/0	0/0	0/0	0/0	0/0	0/0	./.	0/0	0/0	0/0	0/0	0/0	0/0	0/0	0/0	0/0	1/1	1/1	0/0	0/0	0/0
1	269395775	SNP-1-269395775	G	T	AC=14;AF=0.088;AN=160;CSQ=T|intron_variant|MODIFIER|ethylene%20receptor1-25|Zm00001d033642|Transcript|Zm00001d033642_T001|protein_coding||5/6||||||||||-1||MaizeGDB|,T|3_prime_UTR_variant|MODIFIER|ethylene%20receptor1-25|Zm00001d033642|Transcript|Zm00001d033642_T003|protein_coding|4/5||||2821|||||||-1||MaizeGDB|,T|intron_variant|MODIFIER|ethylene%20receptor1-25|Zm00001d033642|Transcript|Zm00001d03…	0/0	0/0	0/0	0/0	0/0	1/1	0/0	0/0	0/0	0/0	0/0	0/0	0/0	0/0	0/0	0/0	1/1	0/0	0/0	0/0	0/0	0/0	0/0	0/0	0/0	0/0	0/0	0/0	0/0	0/0	0/0	0/0	0/0	0/0	0/0	0/0	0/0	0/0	0/0	1/1	1/1	0/0	0/0	0/0
1	269395956	SNP-1-269395956	C	A	AC=14;AF=0.088;AN=160;CSQ=A|intron_variant|MODIFIER|ethylene%20receptor1-25|Zm00001d033642|Transcript|Zm00001d033642_T001|protein_coding||4/6||||||||||-1||MaizeGDB|,A|3_prime_UTR_variant|MODIFIER|ethylene%20receptor1-25|Zm00001d033642|Transcript|Zm00001d033642_T003|protein_coding|3/5||||2741|||||||-1||MaizeGDB|,A|intron_variant|MODIFIER|ethylene%20receptor1-25|Zm00001d033642|Transcript|Zm00001d03…	0/0	0/0	0/0	0/0	0/0	1/1	0/0	0/0	0/0	0/0	0/0	0/0	0/0	0/0	0/0	0/0	1/1	0/0	0/0	0/0	0/0	0/0	0/0	0/0	0/0	0/0	0/0	0/0	0/0	0/0	0/0	0/0	0/0	0/0	0/0	0/0	0/0	0/0	0/0	1/1	1/1	0/0	0/0	0/0
1	269395974	SNP-1-269395974	A	G	AC=14;AF=0.088;AN=160;CSQ=G|intron_variant|MODIFIER|ethylene%20receptor1-25|Zm00001d033642|Transcript|Zm00001d033642_T001|protein_coding||4/6||||||||||-1||MaizeGDB|,G|3_prime_UTR_variant|MODIFIER|ethylene%20receptor1-25|Zm00001d033642|Transcript|Zm00001d033642_T003|protein_coding|3/5||||2723|||||||-1||MaizeGDB|,G|intron_variant|MODIFIER|ethylene%20receptor1-25|Zm00001d033642|Transcript|Zm00001d03…	0/0	0/0	0/0	0/0	0/0	1/1	0/0	0/0	0/0	0/0	0/0	0/0	0/0	0/0	0/0	0/0	1/1	0/0	0/0	0/0	0/0	0/0	0/0	0/0	0/0	0/0	0/0	0/0	0/0	0/0	0/0	0/0	0/0	0/0	0/0	0/0	0/0	0/0	0/0	1/1	1/1	0/0	0/0	0/0
1	269396000	SNP-1-269396000	G	T	AC=14;AF=0.088;AN=160;CSQ=T|intron_variant|MODIFIER|ethylene%20receptor1-25|Zm00001d033642|Transcript|Zm00001d033642_T001|protein_coding||4/6||||||||||-1||MaizeGDB|,T|3_prime_UTR_variant|MODIFIER|ethylene%20receptor1-25|Zm00001d033642|Transcript|Zm00001d033642_T003|protein_coding|3/5||||2697|||||||-1||MaizeGDB|,T|intron_variant|MODIFIER|ethylene%20receptor1-25|Zm00001d033642|Transcript|Zm00001d03…	0/0	0/0	0/0	0/0	0/0	1/1	0/0	0/0	0/0	0/0	0/0	0/0	0/0	0/0	0/0	0/0	1/1	0/0	0/0	0/0	0/0	0/0	0/0	0/0	0/0	0/0	0/0	0/0	0/0	0/0	0/0	0/0	0/0	0/0	0/0	0/0	0/0	0/0	0/0	1/1	1/1	0/0	0/0	0/0
1	269396030	SNP-1-269396030	C	G	AC=12;AF=0.076;AN=158;CSQ=G|intron_variant|MODIFIER|ethylene%20receptor1-25|Zm00001d033642|Transcript|Zm00001d033642_T001|protein_coding||4/6||||||||||-1||MaizeGDB|,G|3_prime_UTR_variant|MODIFIER|ethylene%20receptor1-25|Zm00001d033642|Transcript|Zm00001d033642_T003|protein_coding|3/5||||2667|||||||-1||MaizeGDB|,G|intron_variant|MODIFIER|ethylene%20receptor1-25|Zm00001d033642|Transcript|Zm00001d03…	0/0	0/0	0/0	0/0	0/0	1/1	0/0	0/0	0/0	0/0	0/0	0/0	0/0	0/0	0/0	0/0	./.	0/0	0/0	0/0	0/0	0/0	0/0	0/0	0/0	0/0	0/0	0/0	0/0	0/0	0/0	0/0	0/0	0/0	0/0	0/0	0/0	0/0	0/0	1/1	1/1	0/0	0/0	0/0
1	269396031	SNP-1-269396031	A	T	AC=12;AF=0.076;AN=158;CSQ=T|intron_variant|MODIFIER|ethylene%20receptor1-25|Zm00001d033642|Transcript|Zm00001d033642_T001|protein_coding||4/6||||||||||-1||MaizeGDB|,T|3_prime_UTR_variant|MODIFIER|ethylene%20receptor1-25|Zm00001d033642|Transcript|Zm00001d033642_T003|protein_coding|3/5||||2666|||||||-1||MaizeGDB|,T|intron_variant|MODIFIER|ethylene%20receptor1-25|Zm00001d033642|Transcript|Zm00001d03…	0/0	0/0	0/0	0/0	0/0	1/1	0/0	0/0	0/0	0/0	0/0	0/0	0/0	0/0	0/0	0/0	./.	0/0	0/0	0/0	0/0	0/0	0/0	0/0	0/0	0/0	0/0	0/0	0/0	0/0	0/0	0/0	0/0	0/0	0/0	0/0	0/0	0/0	0/0	1/1	1/1	0/0	0/0	0/0
1	269396101	SNP-1-269396101	A	T	AC=33;AF=0.217;AN=152;BaseQRankSum=1.83;CSQ=T|intron_variant|MODIFIER|ethylene%20receptor1-25|Zm00001d033642|Transcript|Zm00001d033642_T001|protein_coding||4/6||||||||||-1||MaizeGDB|,T|3_prime_UTR_variant|MODIFIER|ethylene%20receptor1-25|Zm00001d033642|Transcript|Zm00001d033642_T003|protein_coding|3/5||||2596|||||||-1||MaizeGDB|,T|intron_variant|MODIFIER|ethylene%20receptor1-25|Zm00001d033642|Tra…	0/0	0/0	0/0	0/0	0/0	1/1	1/1	./.	0/0	0/0	0/1	0/0	0/0	1/1	0/0	0/0	./.	0/0	0/0	0/0	0/0	0/0	0/0	1/1	1/1	0/0	0/0	0/0	0/0	0/0	0/0	0/0	0/0	1/1	0/0	0/0	0/0	0/0	0/0	1/1	1/1	./.	0/0	1/1
1	269396118	SNP-1-269396118	G	A	AC=31;AF=0.201;AN=154;BaseQRankSum=-0.967;CSQ=A|intron_variant|MODIFIER|ethylene%20receptor1-25|Zm00001d033642|Transcript|Zm00001d033642_T001|protein_coding||4/6||||||||||-1||MaizeGDB|,A|3_prime_UTR_variant|MODIFIER|ethylene%20receptor1-25|Zm00001d033642|Transcript|Zm00001d033642_T003|protein_coding|3/5||||2579|||||||-1||MaizeGDB|,A|intron_variant|MODIFIER|ethylene%20receptor1-25|Zm00001d033642|T…	0/0	0/0	0/0	0/0	0/0	1/1	1/1	0/0	0/0	0/0	0/1	0/0	0/0	1/1	0/0	0/0	./.	0/0	0/0	0/0	0/0	0/0	0/0	1/1	1/1	0/0	0/0	0/0	0/0	0/0	0/0	0/0	0/0	1/1	0/0	0/0	0/0	0/0	0/0	1/1	1/1	0/0	0/0	1/1
1	269396126	SNP-1-269396126	A	C	AC=12;AF=0.079;AN=152;CSQ=C|intron_variant|MODIFIER|ethylene%20receptor1-25|Zm00001d033642|Transcript|Zm00001d033642_T001|protein_coding||4/6||||||||||-1||MaizeGDB|,C|3_prime_UTR_variant|MODIFIER|ethylene%20receptor1-25|Zm00001d033642|Transcript|Zm00001d033642_T003|protein_coding|3/5||||2571|||||||-1||MaizeGDB|,C|intron_variant|MODIFIER|ethylene%20receptor1-25|Zm00001d033642|Transcript|Zm00001d03…	0/0	0/0	0/0	0/0	0/0	1/1	0/0	0/0	0/0	0/0	0/0	0/0	0/0	0/0	0/0	0/0	./.	0/0	0/0	0/0	0/0	0/0	0/0	0/0	0/0	0/0	0/0	0/0	0/0	0/0	0/0	0/0	0/0	0/0	0/0	0/0	0/0	0/0	0/0	1/1	1/1	0/0	0/0	0/0
1	269396139	INS-1-269396139	T	TTG	AC=12;AF=0.079;AN=152;CSQ=TG|intron_variant|MODIFIER|ethylene%20receptor1-25|Zm00001d033642|Transcript|Zm00001d033642_T001|protein_coding||4/6||||||||||-1||MaizeGDB|,TG|3_prime_UTR_variant|MODIFIER|ethylene%20receptor1-25|Zm00001d033642|Transcript|Zm00001d033642_T003|protein_coding|3/5||||2557-2558|||||||-1||MaizeGDB|,TG|intron_variant|MODIFIER|ethylene%20receptor1-25|Zm00001d033642|Transcript|Zm…	0/0	0/0	0/0	0/0	0/0	1/1	0/0	0/0	0/0	0/0	0/0	0/0	0/0	./.	0/0	0/0	./.	0/0	0/0	0/0	0/0	0/0	0/0	0/0	0/0	0/0	0/0	0/0	0/0	0/0	0/0	0/0	0/0	0/0	0/0	0/0	0/0	0/0	0/0	1/1	1/1	0/0	0/0	0/0
1	269396160	SNP-1-269396160	A	C	AC=29;AF=0.191;AN=152;BaseQRankSum=0.967;CSQ=C|intron_variant|MODIFIER|ethylene%20receptor1-25|Zm00001d033642|Transcript|Zm00001d033642_T001|protein_coding||4/6||||||||||-1||MaizeGDB|,C|3_prime_UTR_variant|MODIFIER|ethylene%20receptor1-25|Zm00001d033642|Transcript|Zm00001d033642_T003|protein_coding|3/5||||2537|||||||-1||MaizeGDB|,C|intron_variant|MODIFIER|ethylene%20receptor1-25|Zm00001d033642|Tr…	0/0	0/0	0/0	0/0	0/0	1/1	1/1	0/0	0/0	0/0	0/1	0/0	0/0	./.	0/0	0/0	./.	0/0	0/0	0/0	0/0	0/0	0/0	1/1	1/1	0/0	0/0	0/0	0/0	0/0	0/0	0/0	0/0	1/1	0/0	0/0	0/0	0/0	0/0	1/1	1/1	0/0	0/0	1/1
1	269396224	SNP-1-269396224	T	C	AC=21;AF=0.144;AN=146;BaseQRankSum=-0.674;CSQ=C|intron_variant|MODIFIER|ethylene%20receptor1-25|Zm00001d033642|Transcript|Zm00001d033642_T001|protein_coding||4/6||||||||||-1||MaizeGDB|,C|3_prime_UTR_variant|MODIFIER|ethylene%20receptor1-25|Zm00001d033642|Transcript|Zm00001d033642_T003|protein_coding|3/5||||2473|||||||-1||MaizeGDB|,C|intron_variant|MODIFIER|ethylene%20receptor1-25|Zm00001d033642|T…	0/0	0/0	0/0	0/0	0/0	1/1	1/1	0/0	0/0	0/0	0/1	0/0	0/0	./.	0/0	0/0	1/1	0/0	0/0	0/0	0/0	0/0	0/0	1/1	1/1	0/0	0/0	0/0	0/0	0/0	0/0	0/0	0/0	./.	0/0	0/0	0/0	0/0	0/0	1/1	1/1	0/0	0/0	1/1
1	269396277	SNP-1-269396277	C	T	AC=14;AF=0.091;AN=154;CSQ=T|intron_variant|MODIFIER|ethylene%20receptor1-25|Zm00001d033642|Transcript|Zm00001d033642_T001|protein_coding||4/6||||||||||-1||MaizeGDB|,T|3_prime_UTR_variant|MODIFIER|ethylene%20receptor1-25|Zm00001d033642|Transcript|Zm00001d033642_T003|protein_coding|3/5||||2420|||||||-1||MaizeGDB|,T|intron_variant|MODIFIER|ethylene%20receptor1-25|Zm00001d033642|Transcript|Zm00001d03…	0/0	0/0	0/0	0/0	0/0	0/0	1/1	0/0	0/0	0/0	0/0	0/0	0/0	./.	0/0	0/0	0/0	0/0	0/0	0/0	0/0	0/0	0/0	1/1	1/1	0/0	0/0	0/0	0/0	0/0	0/0	0/0	0/0	./.	0/0	0/0	0/0	0/0	0/0	0/0	0/0	0/0	0/0	1/1
1	269396291	SNP-1-269396291	C	G	AC=14;AF=0.089;AN=158;CSQ=G|intron_variant|MODIFIER|ethylene%20receptor1-25|Zm00001d033642|Transcript|Zm00001d033642_T001|protein_coding||4/6||||||||||-1||MaizeGDB|,G|3_prime_UTR_variant|MODIFIER|ethylene%20receptor1-25|Zm00001d033642|Transcript|Zm00001d033642_T003|protein_coding|3/5||||2406|||||||-1||MaizeGDB|,G|intron_variant|MODIFIER|ethylene%20receptor1-25|Zm00001d033642|Transcript|Zm00001d03…	0/0	0/0	0/0	0/0	0/0	1/1	0/0	0/0	0/0	0/0	0/0	0/0	0/0	./.	0/0	0/0	1/1	0/0	0/0	0/0	0/0	0/0	0/0	0/0	0/0	0/0	0/0	0/0	0/0	0/0	0/0	0/0	0/0	0/0	0/0	0/0	0/0	0/0	0/0	1/1	1/1	0/0	0/0	0/0
1	269396312	SNP-1-269396312	C	G	AC=17;AF=0.109;AN=156;BaseQRankSum=0.524;CSQ=G|intron_variant|MODIFIER|ethylene%20receptor1-25|Zm00001d033642|Transcript|Zm00001d033642_T001|protein_coding||4/6||||||||||-1||MaizeGDB|,G|3_prime_UTR_variant|MODIFIER|ethylene%20receptor1-25|Zm00001d033642|Transcript|Zm00001d033642_T003|protein_coding|3/5||||2385|||||||-1||MaizeGDB|,G|intron_variant|MODIFIER|ethylene%20receptor1-25|Zm00001d033642|Tr…	0/0	0/0	0/0	0/0	0/0	0/0	1/1	0/0	0/0	0/0	0/1	0/0	0/0	./.	0/0	0/0	0/0	0/0	0/0	0/0	0/0	0/0	0/0	1/1	1/1	0/0	0/0	0/0	0/0	0/0	0/0	0/0	0/0	1/1	0/0	0/0	0/0	0/0	0/0	0/0	0/0	0/0	0/0	1/1
1	269396370	DEL-1-269396370	AAC	A	AC=24;AF=0.164;AN=146;CSQ=-|intron_variant|MODIFIER|ethylene%20receptor1-25|Zm00001d033642|Transcript|Zm00001d033642_T001|protein_coding||4/6||||||||||-1||MaizeGDB|,-|3_prime_UTR_variant|MODIFIER|ethylene%20receptor1-25|Zm00001d033642|Transcript|Zm00001d033642_T003|protein_coding|3/5||||2325-2326|||||||-1||MaizeGDB|,-|intron_variant|MODIFIER|ethylene%20receptor1-25|Zm00001d033642|Transcript|Zm000…	0/0	0/0	0/0	0/0	0/0	1/1	1/1	0/0	0/0	0/0	0/0	./.	0/0	./.	0/0	0/0	./.	0/0	0/0	0/0	0/0	0/0	0/0	1/1	1/1	0/0	0/0	0/0	0/0	0/0	0/0	0/0	0/0	./.	0/0	0/0	0/0	0/0	0/0	1/1	1/1	0/0	0/0	1/1
1	269396514	SNP-1-269396514	A	G	AC=18;AF=0.118;AN=152;CSQ=G|intron_variant|MODIFIER|ethylene%20receptor1-25|Zm00001d033642|Transcript|Zm00001d033642_T001|protein_coding||4/6||||||||||-1||MaizeGDB|,G|3_prime_UTR_variant|MODIFIER|ethylene%20receptor1-25|Zm00001d033642|Transcript|Zm00001d033642_T003|protein_coding|3/5||||2183|||||||-1||MaizeGDB|,G|intron_variant|MODIFIER|ethylene%20receptor1-25|Zm00001d033642|Transcript|Zm00001d03…	0/0	0/0	0/0	0/0	0/0	0/0	1/1	./.	0/0	./.	./.	0/0	0/0	1/1	0/0	0/0	0/0	0/0	0/0	0/0	0/0	0/0	0/0	1/1	./.	0/0	0/0	0/0	0/0	0/0	0/0	0/0	0/0	1/1	0/0	0/0	0/0	0/0	0/0	0/0	0/0	0/0	0/0	1/1
1	269396517	SNP-1-269396517	A	T	AC=18;AF=0.117;AN=154;CSQ=T|intron_variant|MODIFIER|ethylene%20receptor1-25|Zm00001d033642|Transcript|Zm00001d033642_T001|protein_coding||4/6||||||||||-1||MaizeGDB|,T|3_prime_UTR_variant|MODIFIER|ethylene%20receptor1-25|Zm00001d033642|Transcript|Zm00001d033642_T003|protein_coding|3/5||||2180|||||||-1||MaizeGDB|,T|intron_variant|MODIFIER|ethylene%20receptor1-25|Zm00001d033642|Transcript|Zm00001d03…	0/0	0/0	0/0	0/0	0/0	0/0	1/1	./.	0/0	0/0	./.	0/0	0/0	1/1	0/0	0/0	0/0	0/0	0/0	0/0	0/0	0/0	0/0	1/1	./.	0/0	0/0	0/0	0/0	0/0	0/0	0/0	0/0	1/1	0/0	0/0	0/0	0/0	0/0	0/0	0/0	0/0	0/0	1/1
1	269396553	SNP-1-269396553	G	A	AC=16;AF=0.103;AN=156;CSQ=A|intron_variant|MODIFIER|ethylene%20receptor1-25|Zm00001d033642|Transcript|Zm00001d033642_T001|protein_coding||4/6||||||||||-1||MaizeGDB|,A|3_prime_UTR_variant|MODIFIER|ethylene%20receptor1-25|Zm00001d033642|Transcript|Zm00001d033642_T003|protein_coding|3/5||||2144|||||||-1||MaizeGDB|,A|intron_variant|MODIFIER|ethylene%20receptor1-25|Zm00001d033642|Transcript|Zm00001d03…	0/0	0/0	0/0	0/0	0/0	0/0	1/1	0/0	0/0	0/0	0/0	0/0	0/0	1/1	0/0	0/0	0/0	0/0	0/0	0/0	0/0	0/0	0/0	1/1	./.	0/0	0/0	0/0	0/0	0/0	0/0	0/0	0/0	1/1	0/0	0/0	0/0	0/0	0/0	0/0	0/0	0/0	0/0	1/1
1	269396558	SNP-1-269396558	C	T	AC=16;AF=0.103;AN=156;CSQ=T|intron_variant|MODIFIER|ethylene%20receptor1-25|Zm00001d033642|Transcript|Zm00001d033642_T001|protein_coding||4/6||||||||||-1||MaizeGDB|,T|3_prime_UTR_variant|MODIFIER|ethylene%20receptor1-25|Zm00001d033642|Transcript|Zm00001d033642_T003|protein_coding|3/5||||2139|||||||-1||MaizeGDB|,T|intron_variant|MODIFIER|ethylene%20receptor1-25|Zm00001d033642|Transcript|Zm00001d03…	0/0	0/0	0/0	0/0	0/0	0/0	1/1	0/0	0/0	0/0	0/0	0/0	0/0	1/1	0/0	0/0	0/0	0/0	0/0	0/0	0/0	0/0	0/0	1/1	./.	0/0	0/0	0/0	0/0	0/0	0/0	0/0	0/0	1/1	0/0	0/0	0/0	0/0	0/0	0/0	0/0	0/0	0/0	1/1
1	269396611	INS-1-269396611	T	TA	AC=20;AF=0.127;AN=158;CSQ=A|intron_variant|MODIFIER|ethylene%20receptor1-25|Zm00001d033642|Transcript|Zm00001d033642_T001|protein_coding||4/6||||||||||-1||MaizeGDB|,A|3_prime_UTR_variant|MODIFIER|ethylene%20receptor1-25|Zm00001d033642|Transcript|Zm00001d033642_T003|protein_coding|3/5||||2085-2086|||||||-1||MaizeGDB|,A|intron_variant|MODIFIER|ethylene%20receptor1-25|Zm00001d033642|Transcript|Zm000…	0/0	0/0	0/0	0/0	0/0	0/0	1/1	0/0	0/0	0/0	0/0	0/0	0/0	1/1	0/0	0/0	0/0	0/0	0/0	0/0	0/0	0/0	0/0	1/1	1/1	0/0	0/0	./.	0/0	0/0	0/0	0/0	0/0	1/1	0/0	0/0	0/0	0/0	0/0	0/0	0/0	0/0	0/0	1/1
1	269396632	SNP-1-269396632	C	A	AC=12;AF=0.077;AN=156;CSQ=A|intron_variant|MODIFIER|ethylene%20receptor1-25|Zm00001d033642|Transcript|Zm00001d033642_T001|protein_coding||4/6||||||||||-1||MaizeGDB|,A|3_prime_UTR_variant|MODIFIER|ethylene%20receptor1-25|Zm00001d033642|Transcript|Zm00001d033642_T003|protein_coding|3/5||||2065|||||||-1||MaizeGDB|,A|intron_variant|MODIFIER|ethylene%20receptor1-25|Zm00001d033642|Transcript|Zm00001d03…	0/0	0/0	0/0	0/0	0/0	1/1	0/0	0/0	0/0	0/0	0/0	0/0	0/0	0/0	0/0	0/0	1/1	0/0	0/0	0/0	0/0	0/0	0/0	0/0	0/0	0/0	0/0	./.	0/0	0/0	0/0	0/0	0/0	0/0	0/0	0/0	0/0	0/0	0/0	1/1	1/1	0/0	0/0	0/0
1	269396650	SNP-1-269396650	G	A	AC=30;AF=0.2;AN=150;CSQ=A|intron_variant|MODIFIER|ethylene%20receptor1-25|Zm00001d033642|Transcript|Zm00001d033642_T001|protein_coding||4/6||||||||||-1||MaizeGDB|,A|3_prime_UTR_variant|MODIFIER|ethylene%20receptor1-25|Zm00001d033642|Transcript|Zm00001d033642_T003|protein_coding|3/5||||2047|||||||-1||MaizeGDB|,A|intron_variant|MODIFIER|ethylene%20receptor1-25|Zm00001d033642|Transcript|Zm00001d0336…	0/0	0/0	0/0	0/0	0/0	1/1	1/1	0/0	0/0	./.	0/0	0/0	0/0	1/1	0/0	0/0	1/1	0/0	0/0	0/0	0/0	0/0	0/0	1/1	1/1	0/0	0/0	./.	0/0	0/0	0/0	0/0	0/0	1/1	0/0	0/0	0/0	0/0	0/0	1/1	1/1	0/0	0/0	./.
1	269396683	SNP-1-269396683	G	C	AC=32;AF=0.208;AN=154;CSQ=C|intron_variant|MODIFIER|ethylene%20receptor1-25|Zm00001d033642|Transcript|Zm00001d033642_T001|protein_coding||4/6||||||||||-1||MaizeGDB|,C|3_prime_UTR_variant|MODIFIER|ethylene%20receptor1-25|Zm00001d033642|Transcript|Zm00001d033642_T003|protein_coding|3/5||||2014|||||||-1||MaizeGDB|,C|intron_variant|MODIFIER|ethylene%20receptor1-25|Zm00001d033642|Transcript|Zm00001d03…	0/0	0/0	0/0	0/0	0/0	1/1	./.	0/0	0/0	./.	0/0	0/0	0/0	1/1	0/0	0/0	1/1	0/0	0/0	0/0	0/0	0/0	0/0	1/1	1/1	0/0	0/0	0/0	0/0	0/0	0/0	0/0	0/0	1/1	0/0	0/0	0/0	0/0	0/0	1/1	1/1	0/0	0/0	1/1
1	269396707	DEL-1-269396707	GA	G	AC=14;AF=0.091;AN=154;CSQ=-|intron_variant|MODIFIER|ethylene%20receptor1-25|Zm00001d033642|Transcript|Zm00001d033642_T001|protein_coding||4/6||||||||||-1||MaizeGDB|,-|3_prime_UTR_variant|MODIFIER|ethylene%20receptor1-25|Zm00001d033642|Transcript|Zm00001d033642_T003|protein_coding|3/5||||1989|||||||-1||MaizeGDB|,-|intron_variant|MODIFIER|ethylene%20receptor1-25|Zm00001d033642|Transcript|Zm00001d03…	0/0	0/0	0/0	0/0	0/0	1/1	0/0	0/0	0/0	./.	0/0	0/0	0/0	0/0	0/0	0/0	1/1	0/0	0/0	0/0	0/0	0/0	0/0	0/0	./.	0/0	0/0	0/0	0/0	0/0	0/0	0/0	0/0	0/0	0/0	0/0	0/0	0/0	0/0	1/1	1/1	0/0	0/0	0/0
1	269396767	SNP-1-269396767	A	G	AC=32;AF=0.205;AN=156;CSQ=G|intron_variant|MODIFIER|ethylene%20receptor1-25|Zm00001d033642|Transcript|Zm00001d033642_T001|protein_coding||4/6||||||||||-1||MaizeGDB|,G|3_prime_UTR_variant|MODIFIER|ethylene%20receptor1-25|Zm00001d033642|Transcript|Zm00001d033642_T003|protein_coding|3/5||||1930|||||||-1||MaizeGDB|,G|intron_variant|MODIFIER|ethylene%20receptor1-25|Zm00001d033642|Transcript|Zm00001d03…	0/0	0/0	0/0	0/0	0/0	1/1	1/1	0/0	0/0	0/0	0/0	0/0	0/0	1/1	0/0	0/0	1/1	0/0	0/0	0/0	0/0	0/0	0/0	1/1	./.	0/0	0/0	0/0	0/0	0/0	0/0	0/0	0/0	1/1	0/0	0/0	0/0	0/0	0/0	1/1	1/1	0/0	0/0	1/1
1	269396779	SNP-1-269396779	G	A	AC=18;AF=0.115;AN=156;CSQ=A|intron_variant|MODIFIER|ethylene%20receptor1-25|Zm00001d033642|Transcript|Zm00001d033642_T001|protein_coding||4/6||||||||||-1||MaizeGDB|,A|3_prime_UTR_variant|MODIFIER|ethylene%20receptor1-25|Zm00001d033642|Transcript|Zm00001d033642_T003|protein_coding|3/5||||1918|||||||-1||MaizeGDB|,A|intron_variant|MODIFIER|ethylene%20receptor1-25|Zm00001d033642|Transcript|Zm00001d03…	0/0	0/0	0/0	0/0	0/0	0/0	1/1	0/0	0/0	0/0	0/0	0/0	0/0	1/1	0/0	0/0	0/0	0/0	0/0	0/0	0/0	0/0	0/0	1/1	./.	0/0	0/0	0/0	0/0	0/0	0/0	0/0	0/0	1/1	0/0	0/0	0/0	0/0	0/0	0/0	0/0	0/0	0/0	1/1
1	269396798	SNP-1-269396798	T	A	AC=18;AF=0.115;AN=156;CSQ=A|intron_variant|MODIFIER|ethylene%20receptor1-25|Zm00001d033642|Transcript|Zm00001d033642_T001|protein_coding||4/6||||||||||-1||MaizeGDB|,A|3_prime_UTR_variant|MODIFIER|ethylene%20receptor1-25|Zm00001d033642|Transcript|Zm00001d033642_T003|protein_coding|3/5||||1899|||||||-1||MaizeGDB|,A|intron_variant|MODIFIER|ethylene%20receptor1-25|Zm00001d033642|Transcript|Zm00001d03…	0/0	0/0	0/0	0/0	0/0	0/0	1/1	0/0	0/0	0/0	0/0	0/0	0/0	1/1	0/0	0/0	0/0	0/0	0/0	0/0	0/0	0/0	0/0	1/1	./.	0/0	0/0	0/0	0/0	0/0	0/0	0/0	0/0	1/1	0/0	0/0	0/0	0/0	0/0	0/0	0/0	0/0	0/0	1/1
1	269396800	SNP-1-269396800	G	A	AC=18;AF=0.115;AN=156;CSQ=A|intron_variant|MODIFIER|ethylene%20receptor1-25|Zm00001d033642|Transcript|Zm00001d033642_T001|protein_coding||4/6||||||||||-1||MaizeGDB|,A|3_prime_UTR_variant|MODIFIER|ethylene%20receptor1-25|Zm00001d033642|Transcript|Zm00001d033642_T003|protein_coding|3/5||||1897|||||||-1||MaizeGDB|,A|intron_variant|MODIFIER|ethylene%20receptor1-25|Zm00001d033642|Transcript|Zm00001d03…	0/0	0/0	0/0	0/0	0/0	0/0	1/1	0/0	0/0	0/0	0/0	0/0	0/0	1/1	0/0	0/0	0/0	0/0	0/0	0/0	0/0	0/0	0/0	1/1	./.	0/0	0/0	0/0	0/0	0/0	0/0	0/0	0/0	1/1	0/0	0/0	0/0	0/0	0/0	0/0	0/0	0/0	0/0	1/1
1	269396883	INS-1-269396883	A	ACTAAACGT	AC=12;AF=0.077;AN=156;CSQ=CTAAACGT|intron_variant|MODIFIER|ethylene%20receptor1-25|Zm00001d033642|Transcript|Zm00001d033642_T001|protein_coding||4/6||||||||||-1||MaizeGDB|,CTAAACGT|3_prime_UTR_variant|MODIFIER|ethylene%20receptor1-25|Zm00001d033642|Transcript|Zm00001d033642_T003|protein_coding|3/5||||1813-1814|||||||-1||MaizeGDB|,CTAAACGT|intron_variant|MODIFIER|ethylene%20receptor1-25|Zm00001d03…	0/0	0/0	0/0	0/0	0/0	1/1	0/0	0/0	0/0	0/0	0/0	0/0	0/0	0/0	0/0	0/0	1/1	0/0	0/0	0/0	0/0	0/0	0/0	0/0	0/0	0/0	0/0	0/0	0/0	0/0	0/0	0/0	0/0	0/0	0/0	0/0	0/0	0/0	0/0	1/1	1/1	0/0	0/0	0/0
1	269396899	SNP-1-269396899	A	G	AC=32;AF=0.205;AN=156;CSQ=G|intron_variant|MODIFIER|ethylene%20receptor1-25|Zm00001d033642|Transcript|Zm00001d033642_T001|protein_coding||4/6||||||||||-1||MaizeGDB|,G|3_prime_UTR_variant|MODIFIER|ethylene%20receptor1-25|Zm00001d033642|Transcript|Zm00001d033642_T003|protein_coding|3/5||||1798|||||||-1||MaizeGDB|,G|intron_variant|MODIFIER|ethylene%20receptor1-25|Zm00001d033642|Transcript|Zm00001d03…	0/0	0/0	0/0	0/0	0/0	1/1	1/1	0/0	0/0	0/0	0/0	0/0	0/0	1/1	0/0	0/0	1/1	0/0	0/0	0/0	0/0	0/0	0/0	1/1	1/1	0/0	0/0	0/0	0/0	0/0	0/0	0/0	0/0	1/1	0/0	0/0	0/0	0/0	0/0	1/1	1/1	0/0	0/0	1/1
1	269396917	SNP-1-269396917	C	T	AC=20;AF=0.127;AN=158;CSQ=T|intron_variant|MODIFIER|ethylene%20receptor1-25|Zm00001d033642|Transcript|Zm00001d033642_T001|protein_coding||4/6||||||||||-1||MaizeGDB|,T|3_prime_UTR_variant|MODIFIER|ethylene%20receptor1-25|Zm00001d033642|Transcript|Zm00001d033642_T003|protein_coding|3/5||||1780|||||||-1||MaizeGDB|,T|intron_variant|MODIFIER|ethylene%20receptor1-25|Zm00001d033642|Transcript|Zm00001d03…	0/0	0/0	0/0	0/0	0/0	0/0	1/1	0/0	0/0	0/0	0/0	0/0	0/0	1/1	0/0	0/0	0/0	0/0	0/0	0/0	0/0	0/0	0/0	1/1	1/1	0/0	0/0	0/0	0/0	0/0	0/0	0/0	0/0	1/1	0/0	0/0	0/0	0/0	0/0	0/0	0/0	0/0	0/0	1/1
1	269396966	DEL-1-269396966	AT	A	AC=14;AF=0.088;AN=160;CSQ=-|intron_variant|MODIFIER|ethylene%20receptor1-25|Zm00001d033642|Transcript|Zm00001d033642_T001|protein_coding||4/6||||||||||-1||MaizeGDB|,-|3_prime_UTR_variant|MODIFIER|ethylene%20receptor1-25|Zm00001d033642|Transcript|Zm00001d033642_T003|protein_coding|3/5||||1730|||||||-1||MaizeGDB|,-|intron_variant|MODIFIER|ethylene%20receptor1-25|Zm00001d033642|Transcript|Zm00001d03…	0/0	0/0	0/0	0/0	0/0	1/1	0/0	0/0	0/0	0/0	0/0	0/0	0/0	0/0	0/0	0/0	1/1	0/0	0/0	0/0	0/0	0/0	0/0	0/0	0/0	0/0	0/0	0/0	0/0	0/0	0/0	0/0	0/0	0/0	0/0	0/0	0/0	0/0	0/0	1/1	1/1	0/0	0/0	0/0
1	269397018	INS-1-269397018	C	CAA	AC=14;AF=0.089;AN=158;CSQ=AA|intron_variant|MODIFIER|ethylene%20receptor1-25|Zm00001d033642|Transcript|Zm00001d033642_T001|protein_coding||4/6||||||||||-1||MaizeGDB|,AA|3_prime_UTR_variant|MODIFIER|ethylene%20receptor1-25|Zm00001d033642|Transcript|Zm00001d033642_T003|protein_coding|3/5||||1678-1679|||||||-1||MaizeGDB|,AA|intron_variant|MODIFIER|ethylene%20receptor1-25|Zm00001d033642|Transcript|Zm…	./.	0/0	0/0	0/0	0/0	1/1	0/0	0/0	0/0	0/0	0/0	0/0	0/0	0/0	0/0	0/0	1/1	0/0	0/0	0/0	0/0	0/0	0/0	0/0	0/0	0/0	0/0	0/0	0/0	0/0	0/0	0/0	0/0	0/0	0/0	0/0	0/0	0/0	0/0	1/1	1/1	0/0	0/0	0/0
1	269397032	SNP-1-269397032	T	C	AC=36;AF=0.225;AN=160;BaseQRankSum=1.65;CSQ=C|intron_variant|MODIFIER|ethylene%20receptor1-25|Zm00001d033642|Transcript|Zm00001d033642_T001|protein_coding||4/6||||||||||-1||MaizeGDB|,C|3_prime_UTR_variant|MODIFIER|ethylene%20receptor1-25|Zm00001d033642|Transcript|Zm00001d033642_T003|protein_coding|3/5||||1665|||||||-1||MaizeGDB|,C|intron_variant|MODIFIER|ethylene%20receptor1-25|Zm00001d033642|Tra…	0/0	0/0	0/0	0/0	0/0	1/1	1/1	0/0	0/0	0/1	0/1	0/0	0/0	1/1	0/0	0/0	1/1	0/0	0/0	0/0	0/0	0/0	0/0	1/1	1/1	0/0	0/0	0/0	0/0	0/0	0/0	0/0	0/0	1/1	0/0	0/0	0/0	0/0	0/0	1/1	1/1	0/0	0/0	1/1
1	269397075	SNP-1-269397075	T	C	AC=22;AF=0.138;AN=160;BaseQRankSum=1.83;CSQ=C|intron_variant|MODIFIER|ethylene%20receptor1-25|Zm00001d033642|Transcript|Zm00001d033642_T001|protein_coding||4/6||||||||||-1||MaizeGDB|,C|3_prime_UTR_variant|MODIFIER|ethylene%20receptor1-25|Zm00001d033642|Transcript|Zm00001d033642_T003|protein_coding|3/5||||1622|||||||-1||MaizeGDB|,C|intron_variant|MODIFIER|ethylene%20receptor1-25|Zm00001d033642|Tra…	0/0	0/0	0/0	0/0	0/0	0/0	1/1	0/0	0/0	0/1	0/1	0/0	0/0	1/1	0/0	0/0	0/0	0/0	0/0	0/0	0/0	0/0	0/0	1/1	1/1	0/0	0/0	0/0	0/0	0/0	0/0	0/0	0/0	1/1	0/0	0/0	0/0	0/0	0/0	0/0	0/0	0/0	0/0	1/1
1	269397097	INS-1-269397097	T	TC	AC=14;AF=0.088;AN=160;CSQ=C|intron_variant|MODIFIER|ethylene%20receptor1-25|Zm00001d033642|Transcript|Zm00001d033642_T001|protein_coding||4/6||||||||||-1||MaizeGDB|,C|3_prime_UTR_variant|MODIFIER|ethylene%20receptor1-25|Zm00001d033642|Transcript|Zm00001d033642_T003|protein_coding|3/5||||1599-1600|||||||-1||MaizeGDB|,C|intron_variant|MODIFIER|ethylene%20receptor1-25|Zm00001d033642|Transcript|Zm000…	0/0	0/0	0/0	0/0	0/0	1/1	0/0	0/0	0/0	0/0	0/0	0/0	0/0	0/0	0/0	0/0	1/1	0/0	0/0	0/0	0/0	0/0	0/0	0/0	0/0	0/0	0/0	0/0	0/0	0/0	0/0	0/0	0/0	0/0	0/0	0/0	0/0	0/0	0/0	1/1	1/1	0/0	0/0	0/0
1	269397413	SNP-1-269397413	C	T	AC=17;AF=0.109;AN=156;BaseQRankSum=-0.967;CSQ=T|intron_variant|MODIFIER|ethylene%20receptor1-25|Zm00001d033642|Transcript|Zm00001d033642_T001|protein_coding||3/6||||||||||-1||MaizeGDB|,T|intron_variant|MODIFIER|ethylene%20receptor1-25|Zm00001d033642|Transcript|Zm00001d033642_T003|protein_coding||2/4||||||||||-1||MaizeGDB|,T|upstream_gene_variant|MODIFIER|ethylene%20receptor1-25|Zm00001d033642|Tra…	0/0	0/0	0/0	0/0	0/0	0/0	1/1	0/0	0/0	0/1	0/1	0/0	0/0	./.	0/0	0/0	0/0	0/0	0/0	0/0	0/0	0/0	0/0	1/1	./.	0/0	0/0	0/0	0/0	0/0	0/0	0/0	0/0	1/1	0/0	0/0	0/0	0/0	0/0	0/0	0/0	0/0	0/0	1/1
1	269397430	DEL-1-269397430	GA	G	AC=16;AF=0.103;AN=156;BaseQRankSum=0.18;CSQ=-|intron_variant|MODIFIER|ethylene%20receptor1-25|Zm00001d033642|Transcript|Zm00001d033642_T001|protein_coding||3/6||||||||||-1||MaizeGDB|,-|intron_variant|MODIFIER|ethylene%20receptor1-25|Zm00001d033642|Transcript|Zm00001d033642_T003|protein_coding||2/4||||||||||-1||MaizeGDB|,-|upstream_gene_variant|MODIFIER|ethylene%20receptor1-25|Zm00001d033642|Trans…	0/0	0/0	0/0	0/0	0/0	0/0	1/1	0/0	0/0	0/0	0/1	0/0	0/0	./.	0/0	0/0	0/0	0/0	0/0	0/0	0/0	0/0	0/0	1/1	./.	0/0	0/0	0/0	0/0	0/0	0/0	0/0	0/0	1/1	0/0	0/0	0/0	0/0	0/0	0/0	0/0	0/0	0/0	1/1
1	269397442	SNP-1-269397442	G	A	AC=14;AF=0.089;AN=158;CSQ=A|intron_variant|MODIFIER|ethylene%20receptor1-25|Zm00001d033642|Transcript|Zm00001d033642_T001|protein_coding||3/6||||||||||-1||MaizeGDB|,A|intron_variant|MODIFIER|ethylene%20receptor1-25|Zm00001d033642|Transcript|Zm00001d033642_T003|protein_coding||2/4||||||||||-1||MaizeGDB|,A|upstream_gene_variant|MODIFIER|ethylene%20receptor1-25|Zm00001d033642|Transcript|Zm00001d0336…	0/0	0/0	0/0	0/0	0/0	1/1	0/0	0/0	0/0	0/0	0/0	0/0	0/0	0/0	0/0	0/0	1/1	0/0	0/0	0/0	0/0	0/0	0/0	0/0	./.	0/0	0/0	0/0	0/0	0/0	0/0	0/0	0/0	0/0	0/0	0/0	0/0	0/0	0/0	1/1	1/1	0/0	0/0	0/0
1	269397447	SNP-1-269397447	T	C	AC=31;AF=0.199;AN=156;BaseQRankSum=1.53;CSQ=C|intron_variant|MODIFIER|ethylene%20receptor1-25|Zm00001d033642|Transcript|Zm00001d033642_T001|protein_coding||3/6||||||||||-1||MaizeGDB|,C|intron_variant|MODIFIER|ethylene%20receptor1-25|Zm00001d033642|Transcript|Zm00001d033642_T003|protein_coding||2/4||||||||||-1||MaizeGDB|,C|upstream_gene_variant|MODIFIER|ethylene%20receptor1-25|Zm00001d033642|Trans…	0/0	0/0	0/0	0/0	0/0	1/1	1/1	0/0	0/0	0/1	0/1	0/0	0/0	./.	0/0	0/0	1/1	0/0	0/0	0/0	0/0	0/0	0/0	1/1	./.	0/0	0/0	0/0	0/0	0/0	0/0	0/0	0/0	1/1	0/0	0/0	0/0	0/0	0/0	1/1	1/1	0/0	0/0	1/1
1	269397477	SNP-1-269397477	C	A	AC=32;AF=0.203;AN=158;BaseQRankSum=-1.383;CSQ=A|intron_variant|MODIFIER|ethylene%20receptor1-25|Zm00001d033642|Transcript|Zm00001d033642_T001|protein_coding||3/6||||||||||-1||MaizeGDB|,A|intron_variant|MODIFIER|ethylene%20receptor1-25|Zm00001d033642|Transcript|Zm00001d033642_T003|protein_coding||2/4||||||||||-1||MaizeGDB|,A|upstream_gene_variant|MODIFIER|ethylene%20receptor1-25|Zm00001d033642|Tra…	0/0	0/0	0/0	0/0	0/0	1/1	1/1	0/0	0/0	0/0	0/1	0/0	0/0	./.	0/0	0/0	1/1	0/0	0/0	0/0	0/0	0/0	0/0	1/1	1/1	0/0	0/0	0/0	0/0	0/0	0/0	0/0	0/0	1/1	0/0	0/0	0/0	0/0	0/0	1/1	1/1	0/0	0/0	1/1
1	269397535	SNP-1-269397535	A	G	AC=14;AF=0.088;AN=160;CSQ=G|intron_variant|MODIFIER|ethylene%20receptor1-25|Zm00001d033642|Transcript|Zm00001d033642_T001|protein_coding||3/6||||||||||-1||MaizeGDB|,G|intron_variant|MODIFIER|ethylene%20receptor1-25|Zm00001d033642|Transcript|Zm00001d033642_T003|protein_coding||2/4||||||||||-1||MaizeGDB|,G|upstream_gene_variant|MODIFIER|ethylene%20receptor1-25|Zm00001d033642|Transcript|Zm00001d0336…	0/0	0/0	0/0	0/0	0/0	1/1	0/0	0/0	0/0	0/0	0/0	0/0	0/0	0/0	0/0	0/0	1/1	0/0	0/0	0/0	0/0	0/0	0/0	0/0	0/0	0/0	0/0	0/0	0/0	0/0	0/0	0/0	0/0	0/0	0/0	0/0	0/0	0/0	0/0	1/1	1/1	0/0	0/0	0/0
1	269397571	DEL-1-269397571	TAATTTGTAG	T	AC=14;AF=0.088;AN=160;CSQ=-|intron_variant|MODIFIER|ethylene%20receptor1-25|Zm00001d033642|Transcript|Zm00001d033642_T001|protein_coding||3/6||||||||||-1||MaizeGDB|,-|intron_variant|MODIFIER|ethylene%20receptor1-25|Zm00001d033642|Transcript|Zm00001d033642_T003|protein_coding||2/4||||||||||-1||MaizeGDB|,-|upstream_gene_variant|MODIFIER|ethylene%20receptor1-25|Zm00001d033642|Transcript|Zm00001d0336…	0/0	0/0	0/0	0/0	0/0	1/1	0/0	0/0	0/0	0/0	0/0	0/0	0/0	0/0	0/0	0/0	1/1	0/0	0/0	0/0	0/0	0/0	0/0	0/0	0/0	0/0	0/0	0/0	0/0	0/0	0/0	0/0	0/0	0/0	0/0	0/0	0/0	0/0	0/0	1/1	1/1	0/0	0/0	0/0
1	269398084	SNP-1-269398084	G	A	AC=33;AF=0.209;AN=158;BaseQRankSum=-2.369;CSQ=A|intron_variant|MODIFIER|ethylene%20receptor1-25|Zm00001d033642|Transcript|Zm00001d033642_T001|protein_coding||2/6||||||||||-1||MaizeGDB|,A|intron_variant|MODIFIER|ethylene%20receptor1-25|Zm00001d033642|Transcript|Zm00001d033642_T003|protein_coding||1/4||||||||||-1||MaizeGDB|,A|upstream_gene_variant|MODIFIER|ethylene%20receptor1-25|Zm00001d033642|Tra…	0/0	0/0	0/0	0/0	0/0	1/1	1/1	0/0	0/0	0/0	0/1	0/0	0/0	1/1	0/0	0/0	1/1	0/0	0/0	0/0	0/0	0/0	0/0	1/1	1/1	0/0	0/0	0/0	0/0	0/0	0/0	0/0	0/0	1/1	0/0	0/0	0/0	0/0	0/0	1/1	1/1	0/0	0/0	1/1
1	269398122	DEL-1-269398122	CTTTTAACCT	C	AC=21;AF=0.131;AN=160;BaseQRankSum=-1.579;CSQ=-|intron_variant|MODIFIER|ethylene%20receptor1-25|Zm00001d033642|Transcript|Zm00001d033642_T001|protein_coding||2/6||||||||||-1||MaizeGDB|,-|intron_variant|MODIFIER|ethylene%20receptor1-25|Zm00001d033642|Transcript|Zm00001d033642_T003|protein_coding||1/4||||||||||-1||MaizeGDB|,-|upstream_gene_variant|MODIFIER|ethylene%20receptor1-25|Zm00001d033642|Tra…	0/0	0/0	0/0	0/0	0/0	0/0	1/1	0/0	0/0	0/0	0/1	0/0	0/0	1/1	0/0	0/0	0/0	0/0	0/0	0/0	0/0	0/0	0/0	1/1	1/1	0/0	0/0	0/0	0/0	0/0	0/0	0/0	0/0	1/1	0/0	0/0	0/0	0/0	0/0	0/0	0/0	0/0	0/0	1/1
1	269398165	SNP-1-269398165	G	A	AC=14;AF=0.089;AN=158;CSQ=A|intron_variant|MODIFIER|ethylene%20receptor1-25|Zm00001d033642|Transcript|Zm00001d033642_T001|protein_coding||2/6||||||||||-1||MaizeGDB|,A|intron_variant|MODIFIER|ethylene%20receptor1-25|Zm00001d033642|Transcript|Zm00001d033642_T003|protein_coding||1/4||||||||||-1||MaizeGDB|,A|upstream_gene_variant|MODIFIER|ethylene%20receptor1-25|Zm00001d033642|Transcript|Zm00001d0336…	0/0	1/1	1/1	0/0	1/1	0/0	0/0	0/0	1/1	0/0	0/0	0/0	0/0	0/0	0/0	0/0	0/0	0/0	0/0	0/0	0/0	1/1	0/0	0/0	0/0	0/0	0/0	0/0	0/0	0/0	0/0	0/0	0/0	./.	0/0	0/0	0/0	0/0	0/0	0/0	0/0	0/0	0/0	0/0
1	269398231	DEL-1-269398231	AT	A	AC=14;AF=0.089;AN=158;CSQ=-|intron_variant|MODIFIER|ethylene%20receptor1-25|Zm00001d033642|Transcript|Zm00001d033642_T001|protein_coding||2/6||||||||||-1||MaizeGDB|,-|intron_variant|MODIFIER|ethylene%20receptor1-25|Zm00001d033642|Transcript|Zm00001d033642_T003|protein_coding||1/4||||||||||-1||MaizeGDB|,-|upstream_gene_variant|MODIFIER|ethylene%20receptor1-25|Zm00001d033642|Transcript|Zm00001d0336…	0/0	0/0	0/0	0/0	0/0	1/1	0/0	0/0	0/0	0/0	0/0	0/0	0/0	0/0	0/0	0/0	1/1	0/0	0/0	0/0	0/0	0/0	0/0	0/0	0/0	0/0	0/0	0/0	0/0	0/0	0/0	0/0	0/0	./.	0/0	0/0	0/0	0/0	0/0	1/1	1/1	0/0	0/0	0/0
1	269398272	SNP-1-269398272	T	C	AC=19;AF=0.12;AN=158;BaseQRankSum=0.674;CSQ=C|intron_variant|MODIFIER|ethylene%20receptor1-25|Zm00001d033642|Transcript|Zm00001d033642_T001|protein_coding||2/6||||||||||-1||MaizeGDB|,C|intron_variant|MODIFIER|ethylene%20receptor1-25|Zm00001d033642|Transcript|Zm00001d033642_T003|protein_coding||1/4||||||||||-1||MaizeGDB|,C|upstream_gene_variant|MODIFIER|ethylene%20receptor1-25|Zm00001d033642|Trans…	0/0	0/0	0/0	0/0	0/0	0/0	1/1	0/0	0/0	0/0	0/1	0/0	0/0	1/1	0/0	0/0	0/0	0/0	0/0	0/0	0/0	0/0	0/0	1/1	1/1	0/0	0/0	0/0	0/0	0/0	0/0	0/0	0/0	./.	0/0	0/0	0/0	0/0	0/0	0/0	0/0	0/0	0/0	1/1
1	269398279	SNP-1-269398279	A	G	AC=12;AF=0.076;AN=158;CSQ=G|intron_variant|MODIFIER|ethylene%20receptor1-25|Zm00001d033642|Transcript|Zm00001d033642_T001|protein_coding||2/6||||||||||-1||MaizeGDB|,G|intron_variant|MODIFIER|ethylene%20receptor1-25|Zm00001d033642|Transcript|Zm00001d033642_T003|protein_coding||1/4||||||||||-1||MaizeGDB|,G|upstream_gene_variant|MODIFIER|ethylene%20receptor1-25|Zm00001d033642|Transcript|Zm00001d0336…	0/0	0/0	0/0	0/0	0/0	1/1	0/0	0/0	0/0	0/0	0/0	0/0	0/0	0/0	0/0	0/0	1/1	0/0	0/0	0/0	0/0	0/0	0/0	0/0	0/0	0/0	0/0	0/0	0/0	0/0	0/0	0/0	0/0	0/0	0/0	0/0	0/0	0/0	0/0	1/1	1/1	0/0	0/0	0/0
1	269398329	SNP-1-269398329	A	G	AC=21;AF=0.131;AN=160;BaseQRankSum=1.83;CSQ=G|intron_variant|MODIFIER|ethylene%20receptor1-25|Zm00001d033642|Transcript|Zm00001d033642_T001|protein_coding||2/6||||||||||-1||MaizeGDB|,G|intron_variant|MODIFIER|ethylene%20receptor1-25|Zm00001d033642|Transcript|Zm00001d033642_T003|protein_coding||1/4||||||||||-1||MaizeGDB|,G|upstream_gene_variant|MODIFIER|ethylene%20receptor1-25|Zm00001d033642|Trans…	0/0	0/0	0/0	0/0	0/0	0/0	1/1	0/0	0/0	0/0	0/1	0/0	0/0	1/1	0/0	0/0	0/0	0/0	0/0	0/0	0/0	0/0	0/0	1/1	1/1	0/0	0/0	0/0	0/0	0/0	0/0	0/0	0/0	1/1	0/0	0/0	0/0	0/0	0/0	0/0	0/0	0/0	0/0	1/1
1	269398363	DEL-1-269398363	GT	G	AC=12;AF=0.077;AN=156;CSQ=-|intron_variant|MODIFIER|ethylene%20receptor1-25|Zm00001d033642|Transcript|Zm00001d033642_T001|protein_coding||2/6||||||||||-1||MaizeGDB|,-|intron_variant|MODIFIER|ethylene%20receptor1-25|Zm00001d033642|Transcript|Zm00001d033642_T003|protein_coding||1/4||||||||||-1||MaizeGDB|,-|upstream_gene_variant|MODIFIER|ethylene%20receptor1-25|Zm00001d033642|Transcript|Zm00001d0336…	0/0	0/0	0/0	0/0	0/0	1/1	0/0	0/0	0/0	0/0	0/0	0/0	0/0	0/0	0/0	0/0	1/1	0/0	0/0	0/0	0/0	0/0	0/0	0/0	0/0	0/0	0/0	0/0	0/0	0/0	0/0	0/0	0/0	0/0	0/0	0/0	./.	0/0	0/0	1/1	1/1	0/0	0/0	0/0
1	269398384	SNP-1-269398384	T	C	AC=12;AF=0.076;AN=158;CSQ=C|intron_variant|MODIFIER|ethylene%20receptor1-25|Zm00001d033642|Transcript|Zm00001d033642_T001|protein_coding||2/6||||||||||-1||MaizeGDB|,C|intron_variant|MODIFIER|ethylene%20receptor1-25|Zm00001d033642|Transcript|Zm00001d033642_T003|protein_coding||1/4||||||||||-1||MaizeGDB|,C|upstream_gene_variant|MODIFIER|ethylene%20receptor1-25|Zm00001d033642|Transcript|Zm00001d0336…	0/0	0/0	0/0	0/0	0/0	1/1	0/0	0/0	0/0	0/0	0/0	0/0	0/0	0/0	0/0	0/0	1/1	0/0	0/0	0/0	0/0	0/0	0/0	0/0	0/0	0/0	0/0	0/0	0/0	0/0	0/0	0/0	0/0	0/0	0/0	0/0	0/0	0/0	0/0	1/1	1/1	0/0	0/0	0/0
1	269398396	SNP-1-269398396	A	G	AC=12;AF=0.076;AN=158;CSQ=G|intron_variant|MODIFIER|ethylene%20receptor1-25|Zm00001d033642|Transcript|Zm00001d033642_T001|protein_coding||2/6||||||||||-1||MaizeGDB|,G|intron_variant|MODIFIER|ethylene%20receptor1-25|Zm00001d033642|Transcript|Zm00001d033642_T003|protein_coding||1/4||||||||||-1||MaizeGDB|,G|upstream_gene_variant|MODIFIER|ethylene%20receptor1-25|Zm00001d033642|Transcript|Zm00001d0336…	0/0	0/0	0/0	0/0	0/0	1/1	0/0	0/0	0/0	0/0	0/0	0/0	0/0	0/0	0/0	0/0	1/1	0/0	0/0	0/0	0/0	0/0	0/0	0/0	0/0	0/0	0/0	0/0	0/0	0/0	0/0	0/0	0/0	0/0	0/0	0/0	0/0	0/0	0/0	1/1	1/1	0/0	0/0	0/0
1	269398408	DEL-1-269398408	AT	A	AC=21;AF=0.131;AN=160;BaseQRankSum=-1.282;CSQ=-|intron_variant|MODIFIER|ethylene%20receptor1-25|Zm00001d033642|Transcript|Zm00001d033642_T001|protein_coding||2/6||||||||||-1||MaizeGDB|,-|intron_variant|MODIFIER|ethylene%20receptor1-25|Zm00001d033642|Transcript|Zm00001d033642_T003|protein_coding||1/4||||||||||-1||MaizeGDB|,-|upstream_gene_variant|MODIFIER|ethylene%20receptor1-25|Zm00001d033642|Tra…	0/0	0/0	0/0	0/0	0/0	0/0	1/1	0/0	0/0	0/0	0/1	0/0	0/0	1/1	0/0	0/0	0/0	0/0	0/0	0/0	0/0	0/0	0/0	1/1	1/1	0/0	0/0	0/0	0/0	0/0	0/0	0/0	0/0	1/1	0/0	0/0	0/0	0/0	0/0	0/0	0/0	0/0	0/0	1/1
1	269398462	SNP-1-269398462	G	A	AC=35;AF=0.219;AN=160;BaseQRankSum=0.21;CSQ=A|intron_variant|MODIFIER|ethylene%20receptor1-25|Zm00001d033642|Transcript|Zm00001d033642_T001|protein_coding||2/6||||||||||-1||MaizeGDB|,A|intron_variant|MODIFIER|ethylene%20receptor1-25|Zm00001d033642|Transcript|Zm00001d033642_T003|protein_coding||1/4||||||||||-1||MaizeGDB|,A|upstream_gene_variant|MODIFIER|ethylene%20receptor1-25|Zm00001d033642|Trans…	0/0	0/0	0/0	0/0	0/0	1/1	1/1	0/0	0/0	0/0	0/1	0/0	0/0	1/1	0/0	0/0	1/1	0/0	0/0	0/0	0/0	0/0	0/0	1/1	1/1	0/0	0/0	0/0	0/0	0/0	0/0	0/0	0/0	1/1	0/0	0/0	0/0	0/0	0/0	1/1	1/1	0/0	0/0	1/1
1	269398497	SNP-1-269398497	A	T	AC=33;AF=0.214;AN=154;BaseQRankSum=1.38;CSQ=T|intron_variant|MODIFIER|ethylene%20receptor1-25|Zm00001d033642|Transcript|Zm00001d033642_T001|protein_coding||2/6||||||||||-1||MaizeGDB|,T|intron_variant|MODIFIER|ethylene%20receptor1-25|Zm00001d033642|Transcript|Zm00001d033642_T003|protein_coding||1/4||||||||||-1||MaizeGDB|,T|upstream_gene_variant|MODIFIER|ethylene%20receptor1-25|Zm00001d033642|Trans…	0/0	0/0	0/0	0/0	0/0	1/1	1/1	0/0	0/0	0/0	0/1	0/0	0/0	1/1	0/0	0/0	1/1	0/0	0/0	0/0	0/0	0/0	0/0	1/1	1/1	0/0	0/0	0/0	0/0	0/0	0/0	0/0	0/0	./.	0/0	0/0	0/0	0/0	0/0	1/1	1/1	0/0	0/0	1/1
1	269398596	INS-1-269398596	C	CAG	AC=31;AF=0.199;AN=156;BaseQRankSum=0.319;CSQ=AG|intron_variant|MODIFIER|ethylene%20receptor1-25|Zm00001d033642|Transcript|Zm00001d033642_T001|protein_coding||2/6||||||||||-1||MaizeGDB|,AG|intron_variant|MODIFIER|ethylene%20receptor1-25|Zm00001d033642|Transcript|Zm00001d033642_T003|protein_coding||1/4||||||||||-1||MaizeGDB|,AG|upstream_gene_variant|MODIFIER|ethylene%20receptor1-25|Zm00001d033642|T…	0/0	0/0	0/0	0/0	0/0	1/1	1/1	0/0	0/0	0/0	0/1	0/0	0/0	1/1	0/0	0/0	1/1	0/0	0/0	0/0	0/0	0/0	0/0	1/1	1/1	0/0	0/0	0/0	0/0	0/0	0/0	0/0	0/0	./.	0/0	0/0	0/0	0/0	0/0	1/1	1/1	0/0	0/0	1/1
1	269398607	SNP-1-269398607	A	G	AC=19;AF=0.12;AN=158;BaseQRankSum=0.674;CSQ=G|intron_variant|MODIFIER|ethylene%20receptor1-25|Zm00001d033642|Transcript|Zm00001d033642_T001|protein_coding||2/6||||||||||-1||MaizeGDB|,G|intron_variant|MODIFIER|ethylene%20receptor1-25|Zm00001d033642|Transcript|Zm00001d033642_T003|protein_coding||1/4||||||||||-1||MaizeGDB|,G|upstream_gene_variant|MODIFIER|ethylene%20receptor1-25|Zm00001d033642|Trans…	0/0	0/0	0/0	0/0	0/0	0/0	1/1	0/0	0/0	0/0	0/1	0/0	0/0	1/1	0/0	0/0	0/0	0/0	0/0	0/0	0/0	0/0	0/0	1/1	1/1	0/0	0/0	0/0	0/0	0/0	0/0	0/0	0/0	./.	0/0	0/0	0/0	0/0	0/0	0/0	0/0	0/0	0/0	1/1
1	269398617	SNP-1-269398617	C	T	AC=14;AF=0.088;AN=160;CSQ=T|intron_variant|MODIFIER|ethylene%20receptor1-25|Zm00001d033642|Transcript|Zm00001d033642_T001|protein_coding||2/6||||||||||-1||MaizeGDB|,T|intron_variant|MODIFIER|ethylene%20receptor1-25|Zm00001d033642|Transcript|Zm00001d033642_T003|protein_coding||1/4||||||||||-1||MaizeGDB|,T|upstream_gene_variant|MODIFIER|ethylene%20receptor1-25|Zm00001d033642|Transcript|Zm00001d0336…	0/0	0/0	0/0	0/0	0/0	1/1	0/0	0/0	0/0	0/0	0/0	0/0	0/0	0/0	0/0	0/0	1/1	0/0	0/0	0/0	0/0	0/0	0/0	0/0	0/0	0/0	0/0	0/0	0/0	0/0	0/0	0/0	0/0	0/0	0/0	0/0	0/0	0/0	0/0	1/1	1/1	0/0	0/0	0/0
1	269398681	SNP-1-269398681	A	G	AC=35;AF=0.219;AN=160;BaseQRankSum=-1.282;CSQ=G|synonymous_variant|LOW|ethylene%20receptor1-25|Zm00001d033642|Transcript|Zm00001d033642_T001|protein_coding|2/7||||1075|894|298|V|gtT/gtC|||-1||MaizeGDB|,G|synonymous_variant|LOW|ethylene%20receptor1-25|Zm00001d033642|Transcript|Zm00001d033642_T003|protein_coding|1/5||||937|894|298|V|gtT/gtC|||-1||MaizeGDB|,G|upstream_gene_variant|MODIFIER|ethylene%…	0/0	0/0	0/0	0/0	0/0	1/1	1/1	0/0	0/0	0/0	0/1	0/0	0/0	1/1	0/0	0/0	1/1	0/0	0/0	0/0	0/0	0/0	0/0	1/1	1/1	0/0	0/0	0/0	0/0	0/0	0/0	0/0	0/0	1/1	0/0	0/0	0/0	0/0	0/0	1/1	1/1	0/0	0/0	1/1
1	269398768	SNP-1-269398768	C	T	AC=33;AF=0.212;AN=156;BaseQRankSum=-0.703;CSQ=T|synonymous_variant|LOW|ethylene%20receptor1-25|Zm00001d033642|Transcript|Zm00001d033642_T001|protein_coding|2/7||||988|807|269|S|tcG/tcA|||-1||MaizeGDB|,T|synonymous_variant|LOW|ethylene%20receptor1-25|Zm00001d033642|Transcript|Zm00001d033642_T003|protein_coding|1/5||||850|807|269|S|tcG/tcA|||-1||MaizeGDB|,T|upstream_gene_variant|MODIFIER|ethylene%2…	0/0	0/0	0/0	0/0	0/0	1/1	1/1	0/0	0/0	0/0	0/1	0/0	0/0	1/1	0/0	0/0	1/1	0/0	0/0	0/0	0/0	./.	0/0	./.	1/1	0/0	0/0	0/0	0/0	0/0	0/0	0/0	0/0	1/1	0/0	0/0	0/0	0/0	0/0	1/1	1/1	0/0	0/0	1/1
1	269399093	SNP-1-269399093	A	G	AC=47;AF=0.294;AN=160;BaseQRankSum=1.07;CSQ=G|missense_variant|MODERATE|ethylene%20receptor1-25|Zm00001d033642|Transcript|Zm00001d033642_T001|protein_coding|2/7||||663|482|161|M/T|aTg/aCg|||-1||MaizeGDB|,G|missense_variant|MODERATE|ethylene%20receptor1-25|Zm00001d033642|Transcript|Zm00001d033642_T003|protein_coding|1/5||||525|482|161|M/T|aTg/aCg|||-1||MaizeGDB|,G|upstream_gene_variant|MODIFIER|et…	1/1	0/0	0/0	1/1	0/0	1/1	1/1	0/0	0/0	0/1	0/1	0/0	1/1	1/1	0/0	0/0	1/1	0/0	0/0	0/0	0/0	0/0	0/0	1/1	1/1	0/0	0/0	0/0	0/0	0/0	0/0	0/0	0/0	1/1	0/0	0/0	0/0	0/0	0/0	1/1	1/1	0/0	1/1	1/1
1	269399425	SNP-1-269399425	C	T	AC=14;AF=0.089;AN=158;CSQ=T|synonymous_variant|LOW|ethylene%20receptor1-25|Zm00001d033642|Transcript|Zm00001d033642_T001|protein_coding|2/7||||331|150|50|P|ccG/ccA|||-1||MaizeGDB|,T|synonymous_variant|LOW|ethylene%20receptor1-25|Zm00001d033642|Transcript|Zm00001d033642_T003|protein_coding|1/5||||193|150|50|P|ccG/ccA|||-1||MaizeGDB|,T|synonymous_variant|LOW|ethylene%20receptor1-25|Zm00001d033642|T…	0/0	0/0	0/0	0/0	0/0	1/1	0/0	0/0	0/0	0/0	0/0	0/0	0/0	./.	0/0	0/0	1/1	0/0	0/0	0/0	0/0	0/0	0/0	0/0	0/0	0/0	0/0	0/0	0/0	0/0	0/0	0/0	0/0	0/0	0/0	0/0	0/0	0/0	0/0	1/1	1/1	0/0	0/0	0/0
1	269399485	SNP-1-269399485	G	T	AC=21;AF=0.131;AN=160;BaseQRankSum=-1.282;CSQ=T|synonymous_variant|LOW|ethylene%20receptor1-25|Zm00001d033642|Transcript|Zm00001d033642_T001|protein_coding|2/7||||271|90|30|L|ctC/ctA|||-1||MaizeGDB|,T|synonymous_variant|LOW|ethylene%20receptor1-25|Zm00001d033642|Transcript|Zm00001d033642_T003|protein_coding|1/5||||133|90|30|L|ctC/ctA|||-1||MaizeGDB|,T|synonymous_variant|LOW|ethylene%20receptor1-2…	0/0	0/0	0/0	0/0	0/0	0/0	1/1	0/0	0/0	0/0	0/1	0/0	0/0	1/1	0/0	0/0	0/0	0/0	0/0	0/0	0/0	0/0	0/0	1/1	1/1	0/0	0/0	0/0	0/0	0/0	0/0	0/0	0/0	1/1	0/0	0/0	0/0	0/0	0/0	0/0	0/0	0/0	0/0	1/1
1	269399512	SNP-1-269399512	C	T	AC=12;AF=0.076;AN=158;CSQ=T|synonymous_variant|LOW|ethylene%20receptor1-25|Zm00001d033642|Transcript|Zm00001d033642_T001|protein_coding|2/7||||244|63|21|Q|caG/caA|||-1||MaizeGDB|,T|synonymous_variant|LOW|ethylene%20receptor1-25|Zm00001d033642|Transcript|Zm00001d033642_T003|protein_coding|1/5||||106|63|21|Q|caG/caA|||-1||MaizeGDB|,T|synonymous_variant|LOW|ethylene%20receptor1-25|Zm00001d033642|Tra…	0/0	0/0	0/0	0/0	0/0	1/1	0/0	0/0	0/0	0/0	0/0	0/0	0/0	0/0	0/0	0/0	1/1	0/0	0/0	0/0	0/0	0/0	0/0	0/0	0/0	0/0	0/0	0/0	0/0	0/0	0/0	0/0	0/0	0/0	0/0	0/0	0/0	0/0	0/0	1/1	1/1	0/0	0/0	0/0
1	269399677	SNP-1-269399677	A	C	AC=18;AF=0.115;AN=156;CSQ=C|intron_variant|MODIFIER|ethylene%20receptor1-25|Zm00001d033642|Transcript|Zm00001d033642_T001|protein_coding||1/6||||||||||-1||MaizeGDB|,C|upstream_gene_variant|MODIFIER|ethylene%20receptor1-25|Zm00001d033642|Transcript|Zm00001d033642_T003|protein_coding|||||||||||60|-1||MaizeGDB|,C|upstream_gene_variant|MODIFIER|ethylene%20receptor1-25|Zm00001d033642|Transcript|Zm0000…	0/0	0/0	0/0	0/0	0/0	1/1	0/0	0/0	0/0	0/0	0/0	0/0	0/0	0/0	0/0	0/0	1/1	0/0	0/0	0/0	./.	0/0	0/0	0/0	0/0	0/0	0/0	0/0	0/0	0/0	0/0	0/0	0/0	1/1	0/0	0/0	0/0	0/0	0/0	1/1	1/1	0/0	1/1	0/0
1	269399712	SNP-1-269399712	G	A	AC=37;AF=0.237;AN=156;BaseQRankSum=-0.697;CSQ=A|intron_variant|MODIFIER|ethylene%20receptor1-25|Zm00001d033642|Transcript|Zm00001d033642_T001|protein_coding||1/6||||||||||-1||MaizeGDB|,A|upstream_gene_variant|MODIFIER|ethylene%20receptor1-25|Zm00001d033642|Transcript|Zm00001d033642_T003|protein_coding|||||||||||95|-1||MaizeGDB|,A|upstream_gene_variant|MODIFIER|ethylene%20receptor1-25|Zm00001d0336…	0/0	0/0	0/0	0/0	0/0	1/1	1/1	0/0	0/0	0/0	0/1	0/0	0/0	1/1	0/0	0/0	1/1	0/0	0/0	0/0	./.	0/0	0/0	1/1	1/1	0/0	0/0	0/0	0/0	0/0	0/0	0/0	0/0	1/1	0/0	0/0	0/0	0/0	0/0	1/1	1/1	0/0	1/1	1/1
1	269399802	SNP-1-269399802	A	G	AC=14;AF=0.091;AN=154;CSQ=G|intron_variant|MODIFIER|ethylene%20receptor1-25|Zm00001d033642|Transcript|Zm00001d033642_T001|protein_coding||1/6||||||||||-1||MaizeGDB|,G|upstream_gene_variant|MODIFIER|ethylene%20receptor1-25|Zm00001d033642|Transcript|Zm00001d033642_T003|protein_coding|||||||||||185|-1||MaizeGDB|,G|upstream_gene_variant|MODIFIER|ethylene%20receptor1-25|Zm00001d033642|Transcript|Zm000…	0/0	0/0	0/0	0/0	0/0	1/1	0/0	0/0	0/0	0/0	0/0	./.	0/0	0/0	0/0	0/0	1/1	0/0	0/0	0/0	0/0	0/0	0/0	0/0	0/0	0/0	0/0	0/0	0/0	0/0	0/0	0/0	0/0	1/1	0/0	0/0	0/0	0/0	0/0	./.	1/1	0/0	1/1	0/0
1	269399830	SNP-1-269399830	G	A	AC=18;AF=0.12;AN=150;CSQ=A|intron_variant|MODIFIER|ethylene%20receptor1-25|Zm00001d033642|Transcript|Zm00001d033642_T001|protein_coding||1/6||||||||||-1||MaizeGDB|,A|upstream_gene_variant|MODIFIER|ethylene%20receptor1-25|Zm00001d033642|Transcript|Zm00001d033642_T003|protein_coding|||||||||||213|-1||MaizeGDB|,A|upstream_gene_variant|MODIFIER|ethylene%20receptor1-25|Zm00001d033642|Transcript|Zm0000…	0/0	0/0	0/0	0/0	0/0	1/1	0/0	0/0	0/0	0/0	0/0	./.	0/0	0/0	0/0	0/0	1/1	0/0	0/0	0/0	0/0	0/0	./.	0/0	0/0	0/0	0/0	0/0	0/0	./.	0/0	0/0	0/0	1/1	0/0	0/0	0/0	0/0	0/0	1/1	1/1	0/0	1/1	0/0
1	269399835	SNP-1-269399835	C	A	AC=18;AF=0.113;AN=160;CSQ=A|intron_variant|MODIFIER|ethylene%20receptor1-25|Zm00001d033642|Transcript|Zm00001d033642_T001|protein_coding||1/6||||||||||-1||MaizeGDB|,A|upstream_gene_variant|MODIFIER|ethylene%20receptor1-25|Zm00001d033642|Transcript|Zm00001d033642_T003|protein_coding|||||||||||218|-1||MaizeGDB|,A|upstream_gene_variant|MODIFIER|ethylene%20receptor1-25|Zm00001d033642|Transcript|Zm000…	0/0	0/0	0/0	0/0	0/0	1/1	0/0	0/0	0/0	0/0	0/0	0/0	0/0	0/0	0/0	0/0	1/1	0/0	0/0	0/0	0/0	0/0	0/0	0/0	0/0	0/0	0/0	0/0	0/0	0/0	0/0	0/0	0/0	1/1	0/0	0/0	0/0	0/0	0/0	1/1	1/1	0/0	1/1	0/0
1	269399962	SNP-1-269399962	A	G	AC=10;AF=0.064;AN=156;BaseQRankSum=1.28;CSQ=G|intron_variant|MODIFIER|ethylene%20receptor1-25|Zm00001d033642|Transcript|Zm00001d033642_T001|protein_coding||1/6||||||||||-1||MaizeGDB|,G|upstream_gene_variant|MODIFIER|ethylene%20receptor1-25|Zm00001d033642|Transcript|Zm00001d033642_T003|protein_coding|||||||||||345|-1||MaizeGDB|,G|upstream_gene_variant|MODIFIER|ethylene%20receptor1-25|Zm00001d03364…	0/0	0/0	0/0	0/0	0/0	1/1	0/0	0/0	0/0	0/0	0/0	0/0	0/0	0/0	0/0	0/0	0/1	0/0	0/0	0/0	0/0	0/0	0/0	0/0	0/0	0/0	0/0	0/0	0/0	0/0	0/0	0/0	0/0	0/1	0/0	0/0	0/0	0/0	0/0	1/1	0/1	0/0	0/0	0/0
1	269400053	SNP-1-269400053	C	T	AC=16;AF=0.1;AN=160;BaseQRankSum=-0.674;CSQ=T|5_prime_UTR_variant|MODIFIER|ethylene%20receptor1-25|Zm00001d033642|Transcript|Zm00001d033642_T001|protein_coding|1/7||||111|||||||-1||MaizeGDB|,T|upstream_gene_variant|MODIFIER|ethylene%20receptor1-25|Zm00001d033642|Transcript|Zm00001d033642_T003|protein_coding|||||||||||436|-1||MaizeGDB|,T|upstream_gene_variant|MODIFIER|ethylene%20receptor1-25|Zm000…	0/1	0/0	0/0	0/0	0/0	0/0	0/0	0/0	0/0	0/0	0/0	0/1	0/0	0/0	0/0	0/1	0/1	0/0	0/0	0/0	0/0	0/0	0/1	0/0	0/0	0/0	0/0	0/0	0/0	0/1	0/0	0/0	0/1	0/1	0/0	0/0	0/0	0/0	0/0	0/0	0/1	0/0	0/0	0/0
1	269400062	SNP-1-269400062	G	A	AC=8;AF=0.051;AN=156;BaseQRankSum=-0.842;CSQ=A|5_prime_UTR_variant|MODIFIER|ethylene%20receptor1-25|Zm00001d033642|Transcript|Zm00001d033642_T001|protein_coding|1/7||||102|||||||-1||MaizeGDB|,A|upstream_gene_variant|MODIFIER|ethylene%20receptor1-25|Zm00001d033642|Transcript|Zm00001d033642_T003|protein_coding|||||||||||445|-1||MaizeGDB|,A|upstream_gene_variant|MODIFIER|ethylene%20receptor1-25|Zm00…	0/0	0/0	0/0	0/0	0/0	1/1	0/0	0/0	0/0	0/0	0/0	0/0	0/0	0/0	0/0	0/0	0/1	0/0	0/0	0/0	0/0	0/0	0/0	0/0	0/0	0/0	0/0	0/0	0/0	0/0	0/0	0/0	0/0	0/1	0/0	0/0	0/0	0/0	0/0	0/1	0/1	0/0	0/0	0/0
1	269400180	INS-1-269400180	G	GT	AC=18;AF=0.113;AN=160;BaseQRankSum=0.21;CSQ=T|upstream_gene_variant|MODIFIER|ethylene%20receptor1-25|Zm00001d033642|Transcript|Zm00001d033642_T001|protein_coding|||||||||||17|-1||MaizeGDB|,T|upstream_gene_variant|MODIFIER|ethylene%20receptor1-25|Zm00001d033642|Transcript|Zm00001d033642_T003|protein_coding|||||||||||563|-1||MaizeGDB|,T|upstream_gene_variant|MODIFIER|ethylene%20receptor1-25|Zm00001…	0/1	0/0	0/0	0/0	0/0	0/1	0/0	0/0	0/0	0/0	0/1	0/1	0/0	0/0	0/0	0/1	0/1	0/0	0/0	0/0	0/0	0/0	0/1	0/0	0/0	0/0	0/1	0/0	0/0	0/1	0/0	0/0	0/1	0/0	0/0	0/0	0/0	0/0	0/0	0/1	0/1	0/0	0/0	0/0
1	269400199	SNP-1-269400199	C	T	AC=46;AF=0.291;AN=158;BaseQRankSum=-1.18;CSQ=T|upstream_gene_variant|MODIFIER|ethylene%20receptor1-25|Zm00001d033642|Transcript|Zm00001d033642_T001|protein_coding|||||||||||36|-1||MaizeGDB|,T|upstream_gene_variant|MODIFIER|ethylene%20receptor1-25|Zm00001d033642|Transcript|Zm00001d033642_T003|protein_coding|||||||||||582|-1||MaizeGDB|,T|upstream_gene_variant|MODIFIER|ethylene%20receptor1-25|Zm0000…	0/1	0/0	0/0	0/0	0/0	1/1	1/1	0/0	0/0	0/1	0/1	0/1	0/0	1/1	0/0	0/1	1/1	0/0	0/0	0/0	0/0	0/0	0/1	1/1	1/1	0/0	0/1	0/0	0/0	0/1	0/0	0/0	0/1	1/1	0/0	0/0	0/0	0/0	0/0	1/1	1/1	0/0	./.	1/1
1	269400238	INS-1-269400238	G	GTTGTTA	AC=16;AF=0.1;AN=160;BaseQRankSum=0.241;CSQ=TTGTTA|upstream_gene_variant|MODIFIER|ethylene%20receptor1-25|Zm00001d033642|Transcript|Zm00001d033642_T001|protein_coding|||||||||||75|-1||MaizeGDB|,TTGTTA|upstream_gene_variant|MODIFIER|ethylene%20receptor1-25|Zm00001d033642|Transcript|Zm00001d033642_T003|protein_coding|||||||||||621|-1||MaizeGDB|,TTGTTA|upstream_gene_variant|MODIFIER|ethylene%20recept…	0/1	0/0	0/0	0/0	0/0	0/1	0/0	0/0	0/0	0/0	0/0	0/1	0/0	0/0	0/0	0/1	0/1	0/0	0/0	0/0	0/0	0/0	0/1	0/0	0/0	0/0	0/1	0/0	0/0	0/1	0/0	0/0	0/1	0/0	0/0	0/0	0/0	0/0	0/0	0/0	0/1	0/0	0/0	0/0
1	269400302	SNP-1-269400302	T	G	AC=15;AF=0.095;AN=158;BaseQRankSum=1.83;CSQ=G|upstream_gene_variant|MODIFIER|ethylene%20receptor1-25|Zm00001d033642|Transcript|Zm00001d033642_T001|protein_coding|||||||||||139|-1||MaizeGDB|,G|upstream_gene_variant|MODIFIER|ethylene%20receptor1-25|Zm00001d033642|Transcript|Zm00001d033642_T003|protein_coding|||||||||||685|-1||MaizeGDB|,G|upstream_gene_variant|MODIFIER|ethylene%20receptor1-25|Zm0000…	0/1	0/0	0/0	0/0	0/0	0/1	0/0	0/0	0/0	0/0	0/0	0/1	0/0	0/0	0/0	1/1	0/1	0/0	0/0	0/0	0/0	0/0	0/1	0/0	0/0	0/0	0/1	0/0	0/0	0/1	0/0	0/0	0/1	./.	0/0	0/0	0/0	0/0	0/0	0/0	0/1	0/0	0/0	0/0
1	269400314	DEL-1-269400314	TCTTCATGA	T	AC=43;AF=0.272;AN=158;BaseQRankSum=-0.489;CSQ=-|upstream_gene_variant|MODIFIER|ethylene%20receptor1-25|Zm00001d033642|Transcript|Zm00001d033642_T001|protein_coding|||||||||||152|-1||MaizeGDB|,-|upstream_gene_variant|MODIFIER|ethylene%20receptor1-25|Zm00001d033642|Transcript|Zm00001d033642_T003|protein_coding|||||||||||698|-1||MaizeGDB|,-|upstream_gene_variant|MODIFIER|ethylene%20receptor1-25|Zm00…	0/1	0/0	0/0	0/0	0/0	1/1	1/1	0/0	0/0	0/0	0/0	0/1	0/0	1/1	0/0	0/1	1/1	0/0	0/0	0/0	0/0	0/0	0/1	1/1	1/1	0/0	0/1	0/0	0/0	0/1	0/0	0/0	0/1	./.	0/0	0/0	0/0	0/0	0/0	1/1	0/1	0/0	1/1	1/1
1	269400558	SNP-1-269400558	C	T	AC=8;AF=0.051;AN=158;CSQ=T|upstream_gene_variant|MODIFIER|ethylene%20receptor1-25|Zm00001d033642|Transcript|Zm00001d033642_T001|protein_coding|||||||||||395|-1||MaizeGDB|,T|upstream_gene_variant|MODIFIER|ethylene%20receptor1-25|Zm00001d033642|Transcript|Zm00001d033642_T003|protein_coding|||||||||||941|-1||MaizeGDB|,T|upstream_gene_variant|MODIFIER|ethylene%20receptor1-25|Zm00001d033642|Transcript…	0/0	0/0	0/0	0/0	0/0	0/0	0/0	0/0	0/0	0/0	0/0	0/0	0/0	0/0	0/0	0/0	0/0	0/0	0/0	0/0	0/0	0/0	0/0	0/0	0/0	0/0	0/0	1/1	./.	0/0	0/0	0/0	0/0	0/0	0/0	0/0	0/0	1/1	0/0	0/0	0/0	0/0	0/0	0/0
1	269400569	SNP-1-269400569	A	C	AC=18;AF=0.114;AN=158;BaseQRankSum=0.674;CSQ=C|upstream_gene_variant|MODIFIER|ethylene%20receptor1-25|Zm00001d033642|Transcript|Zm00001d033642_T001|protein_coding|||||||||||406|-1||MaizeGDB|,C|upstream_gene_variant|MODIFIER|ethylene%20receptor1-25|Zm00001d033642|Transcript|Zm00001d033642_T003|protein_coding|||||||||||952|-1||MaizeGDB|,C|upstream_gene_variant|MODIFIER|ethylene%20receptor1-25|Zm000…	0/1	0/0	0/0	0/0	0/0	0/1	0/0	0/0	0/0	0/0	0/0	0/1	0/0	0/0	0/0	0/1	0/1	0/0	0/0	0/0	0/0	0/0	0/1	0/0	0/0	0/0	0/1	0/0	./.	0/1	0/0	0/0	0/1	1/1	0/0	0/0	0/0	0/0	0/0	0/0	0/0	0/0	1/1	0/0
1	269400582	SNP-1-269400582	T	C	AC=18;AF=0.114;AN=158;BaseQRankSum=1.35;CSQ=C|upstream_gene_variant|MODIFIER|ethylene%20receptor1-25|Zm00001d033642|Transcript|Zm00001d033642_T001|protein_coding|||||||||||419|-1||MaizeGDB|,C|upstream_gene_variant|MODIFIER|ethylene%20receptor1-25|Zm00001d033642|Transcript|Zm00001d033642_T003|protein_coding|||||||||||965|-1||MaizeGDB|,C|upstream_gene_variant|MODIFIER|ethylene%20receptor1-25|Zm0000…	0/1	0/0	0/0	0/0	0/0	0/1	0/0	0/0	0/0	0/0	0/0	0/1	0/0	0/0	0/0	0/1	0/1	0/0	0/0	0/0	0/0	0/0	0/1	0/0	0/0	0/0	0/1	0/0	./.	0/1	0/0	0/0	0/1	1/1	0/0	0/0	0/0	0/0	0/0	0/0	0/0	0/0	1/1	0/0
1	269400598	DEL-1-269400598	GATAAATACGGTTAAAACACAAAAT	G	AC=15;AF=0.094;AN=160;BaseQRankSum=0;CSQ=-|upstream_gene_variant|MODIFIER|ethylene%20receptor1-25|Zm00001d033642|Transcript|Zm00001d033642_T001|protein_coding|||||||||||436|-1||MaizeGDB|,-|upstream_gene_variant|MODIFIER|ethylene%20receptor1-25|Zm00001d033642|Transcript|Zm00001d033642_T003|protein_coding|||||||||||982|-1||MaizeGDB|,-|upstream_gene_variant|MODIFIER|ethylene%20receptor1-25|Zm00001d0…	0/1	0/0	0/0	0/0	0/0	0/1	0/0	0/0	0/0	0/0	0/0	0/1	0/0	0/0	0/0	0/1	0/1	0/0	0/0	0/0	0/0	0/0	0/1	0/0	0/0	0/0	0/1	0/0	0/0	0/1	0/0	0/0	0/1	0/0	0/0	0/0	0/0	0/0	0/0	0/0	0/1	0/0	0/0	0/0
1	269400701	SNP-1-269400701	C	T	AC=20;AF=0.13;AN=154;BaseQRankSum=0.189;CSQ=T|upstream_gene_variant|MODIFIER|ethylene%20receptor1-25|Zm00001d033642|Transcript|Zm00001d033642_T001|protein_coding|||||||||||538|-1||MaizeGDB|,T|upstream_gene_variant|MODIFIER|ethylene%20receptor1-25|Zm00001d033642|Transcript|Zm00001d033642_T003|protein_coding|||||||||||1084|-1||MaizeGDB|,T|upstream_gene_variant|MODIFIER|ethylene%20receptor1-25|Zm000…	0/0	0/0	0/0	0/0	0/0	1/1	./.	0/0	0/0	0/0	0/1	0/0	0/0	1/1	0/0	0/0	0/1	0/0	0/0	0/0	0/0	0/0	0/0	./.	1/1	0/0	0/0	0/0	0/0	0/0	0/0	0/0	0/0	0/0	0/0	0/0	0/0	0/0	0/0	./.	0/1	0/0	0/0	1/1
1	269400779	SNP-1-269400779	T	C	AC=18;AF=0.113;AN=160;BaseQRankSum=2.19;CSQ=C|upstream_gene_variant|MODIFIER|ethylene%20receptor1-25|Zm00001d033642|Transcript|Zm00001d033642_T001|protein_coding|||||||||||616|-1||MaizeGDB|,C|upstream_gene_variant|MODIFIER|ethylene%20receptor1-25|Zm00001d033642|Transcript|Zm00001d033642_T003|protein_coding|||||||||||1162|-1||MaizeGDB|,C|upstream_gene_variant|MODIFIER|ethylene%20receptor1-25|Zm000…	0/1	0/0	0/0	0/0	0/0	1/1	0/0	0/0	0/0	0/0	0/1	0/1	0/0	0/0	0/0	0/1	0/0	0/0	0/0	0/0	0/0	0/0	0/1	0/0	0/0	0/0	0/1	0/0	0/0	0/1	0/0	0/0	0/1	0/0	0/0	0/0	0/0	0/0	0/0	1/1	0/0	0/0	0/0	0/0
1	269400861	SNP-1-269400861	G	A	AC=21;AF=0.135;AN=156;BaseQRankSum=-0.674;CSQ=A|upstream_gene_variant|MODIFIER|ethylene%20receptor1-25|Zm00001d033642|Transcript|Zm00001d033642_T001|protein_coding|||||||||||698|-1||MaizeGDB|,A|upstream_gene_variant|MODIFIER|ethylene%20receptor1-25|Zm00001d033642|Transcript|Zm00001d033642_T003|protein_coding|||||||||||1244|-1||MaizeGDB|,A|upstream_gene_variant|MODIFIER|ethylene%20receptor1-25|Zm0…	0/0	0/0	0/0	0/0	0/0	0/0	1/1	0/0	0/0	0/0	0/1	0/0	0/0	1/1	0/0	0/0	0/1	0/0	0/0	0/0	0/0	0/0	0/0	1/1	1/1	0/0	0/0	0/0	0/0	0/0	0/0	0/0	0/0	0/0	0/0	0/0	0/0	0/0	0/0	0/0	0/1	0/0	0/0	1/1
1	269400906	SNP-1-269400906	T	C	AC=28;AF=0.189;AN=148;BaseQRankSum=0.674;CSQ=C|upstream_gene_variant|MODIFIER|ethylene%20receptor1-25|Zm00001d033642|Transcript|Zm00001d033642_T001|protein_coding|||||||||||743|-1||MaizeGDB|,C|upstream_gene_variant|MODIFIER|ethylene%20receptor1-25|Zm00001d033642|Transcript|Zm00001d033642_T003|protein_coding|||||||||||1289|-1||MaizeGDB|,C|upstream_gene_variant|MODIFIER|ethylene%20receptor1-25|Zm00…	0/0	0/0	0/0	0/0	0/0	1/1	1/1	0/0	0/0	0/0	0/1	0/0	0/0	1/1	0/0	0/0	1/1	0/0	0/0	0/0	0/0	0/0	0/0	1/1	1/1	0/0	0/0	0/0	0/0	0/0	0/0	0/0	0/1	./.	0/0	0/0	0/0	0/0	0/0	./.	0/1	0/0	1/1	1/1
1	269400944	SNP-1-269400944	C	T	AC=33;AF=0.217;AN=152;BaseQRankSum=-0.431;CSQ=T|upstream_gene_variant|MODIFIER|ethylene%20receptor1-25|Zm00001d033642|Transcript|Zm00001d033642_T001|protein_coding|||||||||||781|-1||MaizeGDB|,T|upstream_gene_variant|MODIFIER|ethylene%20receptor1-25|Zm00001d033642|Transcript|Zm00001d033642_T003|protein_coding|||||||||||1327|-1||MaizeGDB|,T|upstream_gene_variant|MODIFIER|ethylene%20receptor1-25|Zm0…	0/0	0/0	0/0	0/0	0/0	1/1	1/1	0/0	0/0	0/0	0/1	0/0	0/0	1/1	0/0	0/0	1/1	0/0	0/0	0/0	0/0	0/0	0/0	1/1	1/1	0/0	0/0	0/0	0/0	0/0	0/0	0/0	0/0	./.	0/0	0/0	0/0	0/0	0/0	1/1	1/1	0/0	1/1	1/1
1	269401062	SNP-1-269401062	G	A	AC=33;AF=0.226;AN=146;BaseQRankSum=0.566;CSQ=A|upstream_gene_variant|MODIFIER|ethylene%20receptor1-25|Zm00001d033642|Transcript|Zm00001d033642_T001|protein_coding|||||||||||899|-1||MaizeGDB|,A|upstream_gene_variant|MODIFIER|ethylene%20receptor1-25|Zm00001d033642|Transcript|Zm00001d033642_T003|protein_coding|||||||||||1445|-1||MaizeGDB|,A|upstream_gene_variant|MODIFIER|ethylene%20receptor1-25|Zm00…	./.	0/0	0/0	./.	0/0	./.	1/1	0/0	0/0	0/0	0/1	0/0	0/0	1/1	0/0	0/0	1/1	0/0	0/0	0/0	0/0	0/0	0/0	1/1	1/1	0/0	0/0	0/0	0/0	./.	0/0	0/0	0/0	./.	0/0	0/0	0/0	0/0	0/0	1/1	1/1	0/0	1/1	1/1
1	269401078	INS-1-269401078	T	TA	AC=11;AF=0.07;AN=158;BaseQRankSum=0.21;CSQ=A|upstream_gene_variant|MODIFIER|ethylene%20receptor1-25|Zm00001d033642|Transcript|Zm00001d033642_T001|protein_coding|||||||||||915|-1||MaizeGDB|,A|upstream_gene_variant|MODIFIER|ethylene%20receptor1-25|Zm00001d033642|Transcript|Zm00001d033642_T003|protein_coding|||||||||||1461|-1||MaizeGDB|,A|upstream_gene_variant|MODIFIER|ethylene%20receptor1-25|Zm0000…	0/0	0/0	0/0	0/0	0/0	0/0	0/0	0/0	0/0	0/0	0/0	0/0	0/0	0/0	0/0	0/0	1/1	0/0	0/0	0/0	0/0	0/0	0/0	0/0	0/0	0/0	0/0	0/0	0/0	0/0	0/0	0/0	0/0	./.	0/0	0/0	0/0	0/0	0/0	0/1	0/1	0/0	0/0	0/0
1	269401128	SNP-1-269401128	A	G	AC=44;AF=0.275;AN=160;BaseQRankSum=1.53;CSQ=G|upstream_gene_variant|MODIFIER|ethylene%20receptor1-25|Zm00001d033642|Transcript|Zm00001d033642_T001|protein_coding|||||||||||965|-1||MaizeGDB|,G|upstream_gene_variant|MODIFIER|ethylene%20receptor1-25|Zm00001d033642|Transcript|Zm00001d033642_T003|protein_coding|||||||||||1511|-1||MaizeGDB|,G|upstream_gene_variant|MODIFIER|ethylene%20receptor1-25|Zm000…	0/1	0/0	0/0	0/1	0/0	1/1	1/1	0/0	0/0	0/0	0/1	0/0	0/0	1/1	0/0	0/0	1/1	0/0	0/0	0/0	0/0	0/0	0/1	1/1	1/1	0/0	0/0	0/0	0/0	0/1	0/0	0/0	0/1	1/1	0/0	0/0	0/0	0/0	0/0	1/1	1/1	0/0	1/1	1/1
1	269401189	SNP-1-269401189	C	T	AC=15;AF=0.095;AN=158;BaseQRankSum=-1.96;CSQ=T|upstream_gene_variant|MODIFIER|ethylene%20receptor1-25|Zm00001d033642|Transcript|Zm00001d033642_T001|protein_coding|||||||||||1026|-1||MaizeGDB|,T|upstream_gene_variant|MODIFIER|ethylene%20receptor1-25|Zm00001d033642|Transcript|Zm00001d033642_T003|protein_coding|||||||||||1572|-1||MaizeGDB|,T|upstream_gene_variant|MODIFIER|ethylene%20receptor1-25|Zm0…	0/1	0/0	0/0	0/1	0/0	0/1	0/0	0/0	0/0	0/0	0/1	0/1	0/0	0/0	0/0	0/0	0/1	0/0	0/0	0/0	0/0	0/0	0/0	0/0	0/0	0/0	0/1	0/0	0/0	0/1	0/0	0/0	0/0	0/0	0/0	0/0	0/0	0/0	0/0	0/1	0/1	0/0	0/0	0/0
1	269401200	SNP-1-269401200	C	T	AC=25;AF=0.16;AN=156;BaseQRankSum=-0.637;CSQ=T|upstream_gene_variant|MODIFIER|ethylene%20receptor1-25|Zm00001d033642|Transcript|Zm00001d033642_T001|protein_coding|||||||||||1037|-1||MaizeGDB|,T|upstream_gene_variant|MODIFIER|ethylene%20receptor1-25|Zm00001d033642|Transcript|Zm00001d033642_T003|protein_coding|||||||||||1583|-1||MaizeGDB|,T|upstream_gene_variant|MODIFIER|ethylene%20receptor1-25|Zm0…	0/0	0/0	0/0	0/0	0/0	0/1	1/1	0/0	0/0	0/0	0/1	0/0	0/0	1/1	0/0	0/0	0/1	0/0	0/0	0/0	0/0	0/0	0/0	1/1	1/1	0/0	0/0	0/0	0/0	0/0	0/0	0/0	0/0	0/0	0/0	0/0	0/0	0/0	0/0	0/1	0/1	0/0	0/0	1/1
1	269401206	SNP-1-269401206	A	G	AC=43;AF=0.279;AN=154;BaseQRankSum=0.06;CSQ=G|upstream_gene_variant|MODIFIER|ethylene%20receptor1-25|Zm00001d033642|Transcript|Zm00001d033642_T001|protein_coding|||||||||||1043|-1||MaizeGDB|,G|upstream_gene_variant|MODIFIER|ethylene%20receptor1-25|Zm00001d033642|Transcript|Zm00001d033642_T003|protein_coding|||||||||||1589|-1||MaizeGDB|,G|upstream_gene_variant|MODIFIER|ethylene%20receptor1-25|Zm00…	0/1	0/0	0/0	0/1	0/0	1/1	1/1	0/0	0/0	0/0	0/1	0/1	0/0	1/1	0/0	./.	1/1	0/0	0/0	0/0	0/0	0/0	0/0	1/1	1/1	0/0	0/1	0/0	0/0	0/1	0/0	0/0	0/0	1/1	0/0	0/0	0/0	0/0	0/0	1/1	1/1	0/0	1/1	1/1
1	269401251	SNP-1-269401251	T	G	AC=15;AF=0.095;AN=158;BaseQRankSum=0.699;CSQ=G|upstream_gene_variant|MODIFIER|ethylene%20receptor1-25|Zm00001d033642|Transcript|Zm00001d033642_T001|protein_coding|||||||||||1088|-1||MaizeGDB|,G|upstream_gene_variant|MODIFIER|ethylene%20receptor1-25|Zm00001d033642|Transcript|Zm00001d033642_T003|protein_coding|||||||||||1634|-1||MaizeGDB|,G|upstream_gene_variant|MODIFIER|ethylene%20receptor1-25|Zm0…	0/1	0/0	0/0	0/1	0/0	0/1	0/0	0/0	0/0	0/0	0/1	0/1	0/0	0/0	0/0	0/0	0/1	0/0	0/0	0/0	0/0	0/0	0/0	0/0	0/0	./.	0/1	0/0	0/0	0/1	0/0	0/0	0/1	0/0	0/0	0/0	0/0	0/0	0/0	0/1	0/1	0/0	0/0	0/0
1	269401293	SNP-1-269401293	G	A	AC=44;AF=0.282;AN=156;BaseQRankSum=-1.645;CSQ=A|upstream_gene_variant|MODIFIER|ethylene%20receptor1-25|Zm00001d033642|Transcript|Zm00001d033642_T001|protein_coding|||||||||||1130|-1||MaizeGDB|,A|upstream_gene_variant|MODIFIER|ethylene%20receptor1-25|Zm00001d033642|Transcript|Zm00001d033642_T003|protein_coding|||||||||||1676|-1||MaizeGDB|,A|upstream_gene_variant|MODIFIER|ethylene%20receptor1-25|Zm…	0/1	./.	0/0	0/1	0/0	1/1	1/1	0/0	0/0	0/0	0/1	0/1	0/0	1/1	0/0	0/1	1/1	0/0	0/0	0/0	0/0	0/0	0/1	1/1	1/1	0/0	0/1	0/0	0/0	0/1	0/0	0/0	0/1	1/1	0/0	0/0	0/0	0/0	0/0	1/1	1/1	0/0	0/0	1/1
1	269401397	SNP-1-269401397	C	A	AC=46;AF=0.299;AN=154;BaseQRankSum=-1.645;CSQ=A|upstream_gene_variant|MODIFIER|ethylene%20receptor1-25|Zm00001d033642|Transcript|Zm00001d033642_T001|protein_coding|||||||||||1234|-1||MaizeGDB|,A|upstream_gene_variant|MODIFIER|ethylene%20receptor1-25|Zm00001d033642|Transcript|Zm00001d033642_T003|protein_coding|||||||||||1780|-1||MaizeGDB|,A|upstream_gene_variant|MODIFIER|ethylene%20receptor1-25|Zm…	0/1	0/0	./.	0/1	0/0	1/1	1/1	0/0	0/0	0/0	1/1	0/1	0/0	1/1	0/0	0/1	1/1	0/0	0/0	0/0	0/0	0/0	0/1	1/1	1/1	0/0	0/1	0/0	0/0	0/0	0/0	0/0	0/1	1/1	0/0	0/0	0/0	0/0	0/0	1/1	1/1	0/0	1/1	./.
1	269401469	INS-1-269401469	A	AT	AC=30;AF=0.19;AN=158;BaseQRankSum=0.648;CSQ=T|upstream_gene_variant|MODIFIER|ethylene%20receptor1-25|Zm00001d033642|Transcript|Zm00001d033642_T001|protein_coding|||||||||||1306|-1||MaizeGDB|,T|upstream_gene_variant|MODIFIER|ethylene%20receptor1-25|Zm00001d033642|Transcript|Zm00001d033642_T003|protein_coding|||||||||||1852|-1||MaizeGDB|,T|upstream_gene_variant|MODIFIER|ethylene%20receptor1-25|Zm00…	0/1	0/0	0/0	0/1	0/0	0/0	1/1	0/0	0/0	0/0	0/1	0/0	0/0	1/1	0/0	0/1	0/0	0/0	0/0	0/0	0/0	0/0	0/1	1/1	1/1	0/0	0/1	0/0	0/0	0/1	0/0	0/0	0/1	1/1	0/0	0/0	0/0	0/0	0/0	0/0	0/0	0/0	1/1	1/1
1	269401636	SNP-1-269401636	C	G	AC=41;AF=0.27;AN=152;BaseQRankSum=-0.792;CSQ=G|upstream_gene_variant|MODIFIER|ethylene%20receptor1-25|Zm00001d033642|Transcript|Zm00001d033642_T001|protein_coding|||||||||||1473|-1||MaizeGDB|;DP=369;ExcessHet=0;FS=0;InbreedingCoeff=0.4311;MLEAC=46;MLEAF=0.303;MQ=60;MQRankSum=0;QD=19.17;ReadPosRankSum=0.524;SOR=0.755	0/1	0/0	0/0	0/1	0/0	1/1	1/1	0/0	0/0	0/0	0/1	0/1	0/0	1/1	0/0	0/1	1/1	0/0	0/0	0/0	0/0	0/0	0/1	./.	1/1	0/0	0/1	0/0	0/0	0/1	0/0	0/0	0/1	1/1	0/0	0/0	0/0	0/0	0/0	1/1	1/1	0/0	./.	1/1
1	269401699	SNP-1-269401699	C	T	AC=10;AF=0.068;AN=148;CSQ=T|upstream_gene_variant|MODIFIER|ethylene%20receptor1-25|Zm00001d033642|Transcript|Zm00001d033642_T001|protein_coding|||||||||||1536|-1||MaizeGDB|;DP=331;ExcessHet=0;FS=0;InbreedingCoeff=0.5058;MLEAC=8;MLEAF=0.054;MQ=60;QD=20.02;SOR=0.793	0/0	1/1	1/1	0/0	0/0	0/0	0/0	0/0	1/1	0/0	0/0	0/0	./.	0/0	0/0	0/0	0/0	0/0	0/0	0/0	0/0	1/1	0/0	0/0	0/0	0/0	0/0	0/0	0/0	0/0	0/0	0/0	0/0	0/0	0/0	0/0	0/0	0/0	0/0	0/0	0/0	0/0	0/0	0/0
1	269401856	SNP-1-269401856	A	G	AC=23;AF=0.158;AN=146;BaseQRankSum=1.65;CSQ=G|upstream_gene_variant|MODIFIER|ethylene%20receptor1-25|Zm00001d033642|Transcript|Zm00001d033642_T001|protein_coding|||||||||||1693|-1||MaizeGDB|;DP=252;ExcessHet=0.0077;FS=1.82;InbreedingCoeff=0.1011;MLEAC=30;MLEAF=0.205;MQ=59.53;MQRankSum=0;QD=27.46;ReadPosRankSum=0;SOR=0.483	0/0	0/0	0/0	0/1	0/0	0/1	0/0	0/0	0/0	0/0	0/0	0/0	0/0	0/0	0/0	0/1	0/1	0/0	0/0	./.	0/0	0/0	0/0	./.	./.	0/0	0/1	0/0	0/0	0/1	0/0	0/0	0/1	1/1	0/0	0/0	0/0	0/0	0/0	0/1	1/1	0/0	1/1	0/0
1	269401861	SNP-1-269401861	T	C	AC=20;AF=0.137;AN=146;BaseQRankSum=0.566;CSQ=C|upstream_gene_variant|MODIFIER|ethylene%20receptor1-25|Zm00001d033642|Transcript|Zm00001d033642_T001|protein_coding|||||||||||1698|-1||MaizeGDB|;DP=249;ExcessHet=0.117;FS=3.02;InbreedingCoeff=0.0408;MLEAC=26;MLEAF=0.178;MQ=59.5;MQRankSum=0;QD=27.62;ReadPosRankSum=0;SOR=0.41	0/0	0/0	0/0	0/1	0/0	0/1	0/0	0/0	0/0	0/0	0/0	0/0	0/0	0/0	0/0	0/1	0/1	0/0	0/0	./.	0/0	0/0	0/0	./.	./.	0/0	0/1	0/0	0/0	0/1	0/0	0/0	0/1	1/1	0/0	0/0	0/0	0/0	0/0	0/1	1/1	0/0	0/0	0/0
1	269401875	DEL-1-269401875	CT	C	AC=17;AF=0.12;AN=142;BaseQRankSum=-0.566;CSQ=-|upstream_gene_variant|MODIFIER|ethylene%20receptor1-25|Zm00001d033642|Transcript|Zm00001d033642_T001|protein_coding|||||||||||1713|-1||MaizeGDB|;DP=228;ExcessHet=0.2237;FS=8.649;InbreedingCoeff=0.0535;MLEAC=22;MLEAF=0.155;MQ=59.03;MQRankSum=0;QD=27.62;ReadPosRankSum=-0.135;SOR=0.185	0/0	0/0	0/0	0/0	0/0	0/1	0/0	0/0	0/0	0/0	0/0	0/0	0/0	0/0	0/0	0/1	0/1	0/0	0/0	./.	0/0	0/0	0/0	./.	./.	0/0	0/1	0/0	0/0	0/1	0/0	0/0	0/1	0/1	0/0	0/0	./.	0/0	0/0	0/1	./.	0/0	1/1	0/0
1	269401957	SNP-1-269401957	A	G	AC=15;AF=0.11;AN=136;BaseQRankSum=0.842;CSQ=G|upstream_gene_variant|MODIFIER|ethylene%20receptor1-25|Zm00001d033642|Transcript|Zm00001d033642_T001|protein_coding|||||||||||1794|-1||MaizeGDB|;DP=220;ExcessHet=0.0101;FS=12.061;InbreedingCoeff=0.1509;MLEAC=19;MLEAF=0.14;MQ=55.34;MQRankSum=-0.842;QD=30.04;ReadPosRankSum=0;SOR=1.006	0/1	0/0	./.	./.	0/0	0/1	0/0	0/0	0/0	0/0	./.	./.	0/0	0/0	0/0	0/1	0/1	0/0	./.	0/0	0/0	0/0	0/0	0/0	./.	0/0	0/0	0/0	0/0	0/1	0/0	0/0	./.	1/1	0/0	0/0	0/0	0/0	0/0	0/1	1/1	0/0	1/1	0/0
1	269401971	SNP-1-269401971	C	T	AC=13;AF=0.09;AN=144;BaseQRankSum=-0.674;CSQ=T|upstream_gene_variant|MODIFIER|ethylene%20receptor1-25|Zm00001d033642|Transcript|Zm00001d033642_T001|protein_coding|||||||||||1808|-1||MaizeGDB|;DP=223;ExcessHet=0.4397;FS=16.995;InbreedingCoeff=0.0315;MLEAC=17;MLEAF=0.118;MQ=55.39;MQRankSum=-1.036;QD=25.53;ReadPosRankSum=0;SOR=1.829	0/1	0/0	./.	0/0	0/0	0/1	0/0	0/0	0/0	0/0	./.	0/1	0/0	0/0	0/0	0/1	0/1	0/0	0/0	0/0	0/0	0/0	0/0	0/0	./.	0/0	0/0	0/0	0/0	0/1	0/0	0/0	./.	0/0	0/0	0/0	0/0	0/0	0/0	0/1	1/1	0/0	0/0	0/0
1	269401975	SNP-1-269401975	T	C	AC=17;AF=0.12;AN=142;BaseQRankSum=0.967;CSQ=C|upstream_gene_variant|MODIFIER|ethylene%20receptor1-25|Zm00001d033642|Transcript|Zm00001d033642_T001|protein_coding|||||||||||1812|-1||MaizeGDB|;DP=229;ExcessHet=0.0306;FS=13.29;InbreedingCoeff=0.1017;MLEAC=21;MLEAF=0.148;MQ=55.68;MQRankSum=-1.068;QD=27.51;ReadPosRankSum=0;SOR=1.447	0/1	0/0	0/0	./.	0/0	0/1	0/0	0/0	0/0	0/0	./.	0/1	0/0	0/0	0/0	0/1	0/1	0/0	./.	0/0	0/0	0/0	0/0	0/0	./.	0/0	0/0	0/0	0/0	0/1	0/0	0/0	./.	1/1	0/0	0/0	0/0	0/0	0/0	0/1	1/1	0/0	1/1	0/0
1	269402002	SNP-1-269402002	C	T	AC=29;AF=0.21;AN=138;BaseQRankSum=-0.967;CSQ=T|upstream_gene_variant|MODIFIER|ethylene%20receptor1-25|Zm00001d033642|Transcript|Zm00001d033642_T001|protein_coding|||||||||||1839|-1||MaizeGDB|;DP=235;ExcessHet=0;FS=0;InbreedingCoeff=0.4714;MLEAC=34;MLEAF=0.246;MQ=56.91;MQRankSum=-0.431;QD=31.72;ReadPosRankSum=0.341;SOR=0.362	0/0	0/0	0/0	./.	0/0	1/1	1/1	0/0	0/0	0/0	./.	0/1	0/0	1/1	0/0	0/1	1/1	0/0	0/0	0/0	0/0	0/0	0/0	1/1	./.	0/0	0/0	0/0	0/0	0/1	0/0	0/0	0/0	1/1	0/0	0/0	0/0	0/0	0/0	1/1	1/1	0/0	0/0	./.
1	269402014	SNP-1-269402014	C	G	AC=11;AF=0.08;AN=138;BaseQRankSum=0;CSQ=G|upstream_gene_variant|MODIFIER|ethylene%20receptor1-25|Zm00001d033642|Transcript|Zm00001d033642_T001|protein_coding|||||||||||1851|-1||MaizeGDB|;DP=250;ExcessHet=0.0145;FS=12.992;InbreedingCoeff=0.1489;MLEAC=14;MLEAF=0.101;MQ=56.15;MQRankSum=-1.282;QD=21.63;ReadPosRankSum=-0.319;SOR=1.664	0/0	0/0	0/0	./.	0/0	0/1	0/0	0/0	0/0	0/0	./.	0/1	0/0	0/0	0/0	0/1	0/1	0/0	0/0	0/0	0/0	0/0	0/0	0/0	./.	0/0	0/0	0/0	0/0	0/1	0/0	0/0	./.	1/1	0/0	0/0	0/0	0/0	0/0	0/1	1/1	0/0	0/0	0/0
1	269402026	SNP-1-269402026	T	C	AC=16;AF=0.111;AN=144;BaseQRankSum=1.28;CSQ=C|upstream_gene_variant|MODIFIER|ethylene%20receptor1-25|Zm00001d033642|Transcript|Zm00001d033642_T001|protein_coding|||||||||||1863|-1||MaizeGDB|;DP=264;ExcessHet=0.0181;FS=10.038;InbreedingCoeff=0.1157;MLEAC=20;MLEAF=0.139;MQ=57.67;MQRankSum=-0.319;QD=19.88;ReadPosRankSum=-0.674;SOR=0.533	0/0	0/0	0/0	0/1	0/0	0/1	0/0	0/0	0/0	0/0	./.	0/1	0/0	0/0	0/0	0/1	0/1	0/0	0/0	0/0	0/0	0/0	0/0	0/0	./.	0/0	0/1	0/0	0/0	0/1	0/0	0/0	0/0	1/1	0/0	0/0	0/0	0/0	0/0	0/1	./.	0/0	1/1	0/0
1	269402050	DEL-1-269402050	GC	G	AC=18;AF=0.122;AN=148;BaseQRankSum=0.674;CSQ=-|upstream_gene_variant|MODIFIER|ethylene%20receptor1-25|Zm00001d033642|Transcript|Zm00001d033642_T001|protein_coding|||||||||||1888|-1||MaizeGDB|;DP=254;ExcessHet=0.0374;FS=17.733;InbreedingCoeff=0.0937;MLEAC=21;MLEAF=0.142;MQ=59.68;MQRankSum=0;QD=24.26;ReadPosRankSum=-0.524;SOR=0.641	0/0	0/0	0/0	0/1	0/0	0/1	0/0	0/0	0/0	0/0	./.	0/1	0/0	0/0	0/0	0/1	0/0	0/0	0/0	./.	0/0	./.	0/0	0/0	0/0	0/0	0/1	0/0	0/0	0/1	0/0	0/0	0/0	1/1	0/0	0/0	0/0	0/0	0/0	0/1	0/0	0/0	1/1	0/0
1	269402069	SNP-1-269402069	T	G	AC=18;AF=0.117;AN=154;BaseQRankSum=1.38;CSQ=G|upstream_gene_variant|MODIFIER|ethylene%20receptor1-25|Zm00001d033642|Transcript|Zm00001d033642_T001|protein_coding|||||||||||1906|-1||MaizeGDB|;DP=262;ExcessHet=0.0355;FS=22.05;InbreedingCoeff=0.0464;MLEAC=20;MLEAF=0.13;MQ=59.86;MQRankSum=0;QD=16.87;ReadPosRankSum=0;SOR=0.69	0/0	0/0	0/0	0/1	0/0	0/1	0/0	0/0	0/0	0/0	./.	0/1	0/0	0/0	0/0	0/1	0/0	0/0	0/0	0/0	0/0	0/0	0/0	0/0	0/0	0/0	0/1	./.	0/0	0/1	0/0	0/0	0/0	1/1	0/0	0/0	0/0	0/0	0/0	0/1	1/1	0/0	0/0	0/0
1	269402081	SNP-1-269402081	C	T	AC=18;AF=0.115;AN=156;BaseQRankSum=-1.111;CSQ=T|upstream_gene_variant|MODIFIER|ethylene%20receptor1-25|Zm00001d033642|Transcript|Zm00001d033642_T001|protein_coding|||||||||||1918|-1||MaizeGDB|;DP=265;ExcessHet=0.0355;FS=30.665;InbreedingCoeff=0.0171;MLEAC=20;MLEAF=0.128;MQ=59.96;MQRankSum=0;QD=16.53;ReadPosRankSum=0.189;SOR=0.766	0/0	0/0	0/0	0/1	0/0	0/1	0/0	0/0	0/0	0/0	./.	0/1	0/0	0/0	0/0	0/1	0/0	0/0	0/0	0/0	0/0	0/0	0/0	0/0	0/0	0/0	0/1	0/0	0/0	0/1	0/0	0/0	0/0	1/1	0/0	0/0	0/0	0/0	0/0	0/1	1/1	0/0	0/0	0/0
1	269402092	SNP-1-269402092	C	T	AC=17;AF=0.109;AN=156;BaseQRankSum=-0.967;CSQ=T|upstream_gene_variant|MODIFIER|ethylene%20receptor1-25|Zm00001d033642|Transcript|Zm00001d033642_T001|protein_coding|||||||||||1929|-1||MaizeGDB|;DP=261;ExcessHet=0.0208;FS=21.109;InbreedingCoeff=0.0303;MLEAC=20;MLEAF=0.128;MQ=59.96;MQRankSum=0;QD=19.47;ReadPosRankSum=0.887;SOR=0.561	0/0	0/0	0/0	0/1	0/0	0/1	0/0	0/0	0/0	0/0	./.	0/0	0/0	0/0	0/0	0/1	0/0	0/0	0/0	0/0	0/0	0/0	0/0	0/0	0/0	0/0	0/1	0/0	0/0	0/1	0/0	0/0	0/0	1/1	0/0	0/0	0/0	0/0	0/0	0/1	1/1	0/0	0/0	0/0
1	269402134	SNP-1-269402134	C	G	AC=21;AF=0.14;AN=150;BaseQRankSum=-0.842;CSQ=G|upstream_gene_variant|MODIFIER|ethylene%20receptor1-25|Zm00001d033642|Transcript|Zm00001d033642_T001|protein_coding|||||||||||1971|-1||MaizeGDB|;DP=292;ExcessHet=0;FS=13.267;InbreedingCoeff=0.3382;MLEAC=21;MLEAF=0.14;MQ=59.94;MQRankSum=0;QD=16.56;ReadPosRankSum=-1.036;SOR=2.655	0/0	0/0	./.	0/0	0/0	0/1	1/1	0/0	0/0	0/0	0/1	0/0	0/0	1/1	0/0	0/0	1/1	0/0	0/0	0/0	0/0	./.	0/0	1/1	1/1	0/0	0/0	0/0	0/0	0/0	0/0	0/0	0/0	0/0	0/0	0/0	0/0	0/0	0/0	0/1	0/1	0/0	0/0	1/1
1	269402162	DEL-1-269402162	GGGGGCA	G	AC=12;AF=0.078;AN=154;BaseQRankSum=0.674;CSQ=-|upstream_gene_variant|MODIFIER|ethylene%20receptor1-25|Zm00001d033642|Transcript|Zm00001d033642_T001|protein_coding|||||||||||2000|-1||MaizeGDB|;DP=318;ExcessHet=0.2527;FS=21.444;InbreedingCoeff=0.021;MLEAC=13;MLEAF=0.084;MQ=59.84;MQRankSum=0;QD=22.73;ReadPosRankSum=-0.272;SOR=0.393	0/0	0/0	./.	0/1	0/0	0/1	0/0	0/0	0/0	0/0	0/0	0/0	0/0	0/0	0/0	0/1	0/0	0/0	0/0	0/0	0/0	./.	0/0	0/0	0/0	0/0	0/1	0/0	0/0	0/0	0/0	0/0	0/0	1/1	0/0	0/0	0/0	0/0	0/0	0/1	0/0	0/0	0/0	0/0
1	269524134	SNP-1-269524134	A	G	AC=33;AF=0.214;AN=154;BaseQRankSum=0.319;CSQ=G|upstream_gene_variant|MODIFIER||Zm00001d033645|Transcript|Zm00001d033645_T001|protein_coding|||||||||||1974|1|||;DP=368;ExcessHet=0;FS=3.493;InbreedingCoeff=0.7295;MLEAC=32;MLEAF=0.208;MQ=59.6;MQRankSum=0;QD=27.68;ReadPosRankSum=-1.15;SOR=0.502	0/0	0/0	0/0	0/0	0/0	1/1	1/1	0/0	0/0	0/0	0/1	0/0	0/0	1/1	0/0	0/0	1/1	0/0	0/0	0/0	0/0	0/0	0/0	1/1	./.	0/0	0/0	0/0	0/0	0/0	0/0	0/0	0/0	1/1	0/0	0/0	0/0	0/0	0/0	1/1	./.	0/0	1/1	1/1
1	269524140	SNP-1-269524140	G	A	AC=29;AF=0.188;AN=154;BaseQRankSum=-1.15;CSQ=A|upstream_gene_variant|MODIFIER||Zm00001d033645|Transcript|Zm00001d033645_T001|protein_coding|||||||||||1968|1|||;DP=356;ExcessHet=0;FS=3.411;InbreedingCoeff=0.7018;MLEAC=28;MLEAF=0.182;MQ=60;MQRankSum=0;QD=27.08;ReadPosRankSum=-1.15;SOR=0.448	0/0	0/0	0/0	0/0	0/0	1/1	1/1	0/0	0/0	0/0	0/1	0/0	0/0	1/1	0/0	0/0	1/1	0/0	0/0	0/0	0/0	0/0	0/0	1/1	./.	0/0	0/0	0/0	0/0	0/0	0/0	0/0	0/0	0/0	0/0	0/0	0/0	0/0	0/0	1/1	./.	0/0	0/0	1/1
1	269524348	SNP-1-269524348	G	A	AC=33;AF=0.214;AN=154;BaseQRankSum=-1.876;CSQ=A|upstream_gene_variant|MODIFIER||Zm00001d033645|Transcript|Zm00001d033645_T001|protein_coding|||||||||||1760|1|||;DP=358;ExcessHet=0;FS=1.797;InbreedingCoeff=0.7219;MLEAC=33;MLEAF=0.214;MQ=60;MQRankSum=0;QD=21.77;ReadPosRankSum=0.525;SOR=0.659	0/0	0/0	0/0	0/0	0/0	1/1	1/1	0/0	0/0	0/0	0/1	0/0	0/0	./.	0/0	0/0	1/1	0/0	./.	0/0	0/0	0/0	0/0	1/1	1/1	0/0	0/0	0/0	0/0	0/0	0/0	0/0	0/0	1/1	0/0	0/0	0/0	0/0	0/0	1/1	1/1	0/0	0/0	1/1
1	269524626	SNP-1-269524626	G	C	AC=31;AF=0.201;AN=154;BaseQRankSum=0.682;CSQ=C|upstream_gene_variant|MODIFIER||Zm00001d033645|Transcript|Zm00001d033645_T001|protein_coding|||||||||||1482|1|||;DP=388;ExcessHet=0;FS=0;InbreedingCoeff=0.7475;MLEAC=30;MLEAF=0.195;MQ=60;MQRankSum=0;QD=22.95;ReadPosRankSum=-1.645;SOR=0.922	0/0	0/0	0/0	0/0	0/0	1/1	1/1	0/0	0/0	0/0	0/1	0/0	0/0	1/1	0/0	0/0	1/1	0/0	0/0	0/0	0/0	0/0	./.	1/1	1/1	0/0	0/0	0/0	0/0	0/0	0/0	0/0	0/0	0/0	0/0	0/0	0/0	0/0	0/0	1/1	1/1	0/0	0/0	./.
1	269524649	SNP-1-269524649	C	T	AC=8;AF=0.051;AN=158;CSQ=T|upstream_gene_variant|MODIFIER||Zm00001d033645|Transcript|Zm00001d033645_T001|protein_coding|||||||||||1459|1|||;DP=384;ExcessHet=0;FS=0;InbreedingCoeff=0.5076;MLEAC=6;MLEAF=0.038;MQ=60;QD=19.36;SOR=0.892	0/0	0/0	0/0	0/0	0/0	0/0	0/0	0/0	0/0	0/0	0/0	0/0	0/0	0/0	0/0	0/0	0/0	0/0	0/0	0/0	0/0	0/0	./.	0/0	0/0	0/0	0/0	1/1	0/0	0/0	0/0	0/0	0/0	0/0	0/0	0/0	0/0	1/1	0/0	0/0	0/0	0/0	0/0	0/0
1	269524729	SNP-1-269524729	C	T	AC=32;AF=0.2;AN=160;BaseQRankSum=-0.489;CSQ=T|upstream_gene_variant|MODIFIER||Zm00001d033645|Transcript|Zm00001d033645_T001|protein_coding|||||||||||1379|1|||;DP=389;ExcessHet=0;FS=2.047;InbreedingCoeff=0.7099;MLEAC=31;MLEAF=0.194;MQ=60;MQRankSum=0;QD=24.3;ReadPosRankSum=-0.328;SOR=0.314	0/0	0/0	0/0	0/0	0/0	1/1	1/1	0/0	0/0	0/0	0/1	0/0	0/0	1/1	0/0	0/0	1/1	0/0	0/0	0/0	0/0	0/0	0/0	1/1	1/1	0/0	0/0	0/0	0/0	0/0	0/0	0/0	0/0	0/0	0/0	0/0	0/0	0/0	0/0	1/1	1/1	0/0	0/0	1/1
1	269524855	SNP-1-269524855	G	A	AC=35;AF=0.222;AN=158;BaseQRankSum=-2.057;CSQ=A|upstream_gene_variant|MODIFIER||Zm00001d033645|Transcript|Zm00001d033645_T001|protein_coding|||||||||||1253|1|||;DP=377;ExcessHet=0;FS=0;InbreedingCoeff=0.764;MLEAC=32;MLEAF=0.203;MQ=59.8;MQRankSum=0;QD=23.99;ReadPosRankSum=0.936;SOR=0.483	0/0	0/0	0/0	0/0	0/0	1/1	1/1	0/0	0/0	0/0	0/1	0/0	0/0	1/1	0/0	0/0	1/1	0/0	0/0	0/0	0/0	0/0	0/0	1/1	1/1	0/0	0/0	0/0	0/0	0/0	0/0	0/0	0/0	0/0	0/0	0/0	0/0	0/0	0/0	1/1	1/1	0/0	1/1	1/1
1	269524884	SNP-1-269524884	T	C	AC=31;AF=0.196;AN=158;BaseQRankSum=0.566;CSQ=C|upstream_gene_variant|MODIFIER||Zm00001d033645|Transcript|Zm00001d033645_T001|protein_coding|||||||||||1224|1|||;DP=374;ExcessHet=0;FS=5.722;InbreedingCoeff=0.7241;MLEAC=30;MLEAF=0.19;MQ=60;MQRankSum=0;QD=23.13;ReadPosRankSum=0.366;SOR=0.119	0/0	0/0	0/0	0/0	0/0	1/1	1/1	0/0	0/0	0/0	0/1	0/0	0/0	1/1	0/0	0/0	1/1	0/0	0/0	0/0	0/0	0/0	0/0	1/1	1/1	0/0	0/0	0/0	0/0	0/0	0/0	0/0	0/0	0/0	0/0	0/0	0/0	0/0	0/0	1/1	1/1	0/0	0/0	1/1
1	269524989	SNP-1-269524989	T	G	AC=35;AF=0.219;AN=160;BaseQRankSum=0.792;CSQ=G|upstream_gene_variant|MODIFIER||Zm00001d033645|Transcript|Zm00001d033645_T001|protein_coding|||||||||||1119|1|||;DP=374;ExcessHet=0;FS=4.384;InbreedingCoeff=0.7176;MLEAC=32;MLEAF=0.2;MQ=57.43;MQRankSum=-0.489;QD=23.6;ReadPosRankSum=-0.489;SOR=0.176	0/0	0/0	0/0	0/0	0/0	1/1	1/1	0/0	0/0	0/0	0/1	0/0	0/0	0/1	0/0	0/0	1/1	0/0	0/0	0/0	0/0	0/0	0/0	1/1	1/1	0/0	0/0	0/0	0/0	0/0	0/0	0/0	0/0	1/1	0/0	0/0	0/0	0/0	0/0	1/1	1/1	0/0	1/1	1/1
1	269525018	SNP-1-269525018	C	G	AC=35;AF=0.219;AN=160;BaseQRankSum=0.967;CSQ=G|upstream_gene_variant|MODIFIER||Zm00001d033645|Transcript|Zm00001d033645_T001|protein_coding|||||||||||1090|1|||;DP=376;ExcessHet=0;FS=1.68;InbreedingCoeff=0.7254;MLEAC=33;MLEAF=0.206;MQ=57.58;MQRankSum=-0.431;QD=23.99;ReadPosRankSum=-0.589;SOR=0.331	0/0	0/0	0/0	0/0	0/0	1/1	1/1	0/0	0/0	0/0	0/1	0/0	0/0	0/1	0/0	0/0	1/1	0/0	0/0	0/0	0/0	0/0	0/0	1/1	1/1	0/0	0/0	0/0	0/0	0/0	0/0	0/0	0/0	1/1	0/0	0/0	0/0	0/0	0/0	1/1	1/1	0/0	1/1	1/1
1	269525037	SNP-1-269525037	C	T	AC=29;AF=0.188;AN=154;BaseQRankSum=-1.534;CSQ=T|upstream_gene_variant|MODIFIER||Zm00001d033645|Transcript|Zm00001d033645_T001|protein_coding|||||||||||1071|1|||;DP=363;ExcessHet=0;FS=0;InbreedingCoeff=0.6814;MLEAC=28;MLEAF=0.182;MQ=57.94;MQRankSum=-0.489;QD=21.71;ReadPosRankSum=-0.157;SOR=0.521	0/0	0/0	0/0	0/0	0/0	1/1	1/1	0/0	0/0	0/0	0/1	0/0	0/0	0/1	0/0	./.	1/1	0/0	0/0	0/0	0/0	0/0	0/0	1/1	1/1	0/0	0/0	0/0	./.	0/0	0/0	0/0	0/0	0/0	0/0	0/0	0/0	0/0	0/0	1/1	1/1	0/0	0/0	1/1
1	269525132	INS-1-269525132	C	CCTGCTG	AC=33;AF=0.212;AN=156;BaseQRankSum=0.566;CSQ=CTGCTG|upstream_gene_variant|MODIFIER||Zm00001d033645|Transcript|Zm00001d033645_T001|protein_coding|||||||||||975|1|||;DP=361;ExcessHet=0;FS=0;InbreedingCoeff=0.7368;MLEAC=30;MLEAF=0.192;MQ=51.48;MQRankSum=-0.921;QD=27.87;ReadPosRankSum=-0.992;SOR=0.475	0/0	0/0	./.	0/0	0/0	1/1	1/1	0/0	0/0	0/0	0/1	0/0	0/0	1/1	0/0	0/0	1/1	0/0	0/0	0/0	0/0	0/0	0/0	1/1	1/1	0/0	0/0	0/0	0/0	0/0	0/0	0/0	0/0	0/0	0/0	0/0	0/0	0/0	./.	1/1	1/1	0/0	0/0	1/1
1	269525168	SNP-1-269525168	A	G	AC=29;AF=0.186;AN=156;BaseQRankSum=0.674;CSQ=G|upstream_gene_variant|MODIFIER||Zm00001d033645|Transcript|Zm00001d033645_T001|protein_coding|||||||||||940|1|||;DP=374;ExcessHet=0;FS=0;InbreedingCoeff=0.7434;MLEAC=26;MLEAF=0.167;MQ=46.24;MQRankSum=-1.282;QD=24.2;ReadPosRankSum=0.598;SOR=0.446	0/0	0/0	0/0	0/0	0/0	1/1	1/1	0/0	0/0	0/0	0/1	0/0	0/0	1/1	0/0	0/0	1/1	0/0	0/0	0/0	0/0	0/0	0/0	1/1	./.	0/0	0/0	0/0	0/0	0/0	0/0	0/0	0/0	0/0	0/0	0/0	0/0	0/0	0/0	1/1	1/1	0/0	0/0	1/1
1	269525189	DEL-1-269525189	TTACC	T	AC=12;AF=0.077;AN=156;CSQ=-|upstream_gene_variant|MODIFIER||Zm00001d033645|Transcript|Zm00001d033645_T001|protein_coding|||||||||||915|1|||;DP=369;ExcessHet=0;FS=0;InbreedingCoeff=0.6015;MLEAC=10;MLEAF=0.064;MQ=60;QD=30.87;SOR=1.179	0/0	1/1	1/1	0/0	0/0	0/0	0/0	0/0	1/1	0/0	0/0	0/0	0/0	0/0	0/0	0/0	0/0	0/0	0/0	0/0	0/0	1/1	0/0	./.	./.	0/0	0/0	0/0	0/0	0/0	0/0	0/0	0/0	0/0	0/0	0/0	0/0	0/0	0/0	0/0	0/0	0/0	0/0	0/0
1	269525242	SNP-1-269525242	C	T	AC=24;AF=0.158;AN=152;BaseQRankSum=-1.383;CSQ=T|upstream_gene_variant|MODIFIER||Zm00001d033645|Transcript|Zm00001d033645_T001|protein_coding|||||||||||866|1|||;DP=357;ExcessHet=0;FS=0;InbreedingCoeff=0.6571;MLEAC=22;MLEAF=0.145;MQ=40.3;MQRankSum=-0.967;QD=33.33;ReadPosRankSum=-0.189;SOR=0.884	0/0	0/0	0/0	0/0	0/0	1/1	1/1	0/0	0/0	0/0	0/1	0/0	0/0	0/1	0/0	0/0	1/1	0/0	0/0	0/0	0/0	0/0	0/0	./.	./.	0/0	0/0	0/0	0/0	0/0	0/0	0/0	0/0	0/0	0/0	0/0	0/0	0/0	0/0	1/1	./.	0/0	0/0	1/1
1	269525321	DEL-1-269525321	GGAC	G	AC=24;AF=0.158;AN=152;BaseQRankSum=0.366;CSQ=-|upstream_gene_variant|MODIFIER||Zm00001d033645|Transcript|Zm00001d033645_T001|protein_coding|||||||||||784|1|||;DP=306;ExcessHet=0;FS=0;InbreedingCoeff=0.5974;MLEAC=23;MLEAF=0.151;MQ=50.97;MQRankSum=-0.712;QD=22.78;ReadPosRankSum=0.652;SOR=0.931	0/0	0/0	0/0	0/0	0/0	1/1	./.	0/0	0/0	0/0	0/1	0/0	0/0	0/1	0/0	0/0	1/1	0/0	0/0	0/0	0/0	0/0	0/0	1/1	./.	0/0	0/0	0/0	0/0	0/0	0/0	0/0	0/0	0/0	0/0	0/0	0/0	0/0	0/0	1/1	./.	0/0	0/0	1/1
1	269525392	INS-1-269525392	C	CAA	AC=29;AF=0.191;AN=152;BaseQRankSum=1.11;CSQ=AA|upstream_gene_variant|MODIFIER||Zm00001d033645|Transcript|Zm00001d033645_T001|protein_coding|||||||||||715|1|||;DP=307;ExcessHet=0;FS=0;InbreedingCoeff=0.6156;MLEAC=23;MLEAF=0.151;MQ=59.59;MQRankSum=-0.431;QD=27.25;ReadPosRankSum=0.842;SOR=0.502	0/0	0/0	0/0	0/0	0/0	1/1	1/1	0/0	0/0	0/0	0/1	0/0	0/0	0/0	0/0	0/0	1/1	0/0	0/0	0/0	0/0	0/0	0/0	1/1	./.	0/0	0/0	0/0	0/0	0/0	0/0	0/0	0/0	1/1	0/0	0/0	0/0	0/0	0/0	./.	1/1	0/0	1/1	1/1
1	269525661	SNP-1-269525661	G	T	AC=21;AF=0.148;AN=142;BaseQRankSum=0.967;CSQ=T|upstream_gene_variant|MODIFIER||Zm00001d033645|Transcript|Zm00001d033645_T001|protein_coding|||||||||||447|1|||;DP=344;ExcessHet=0;FS=3.411;InbreedingCoeff=0.6078;MLEAC=18;MLEAF=0.127;MQ=59.61;MQRankSum=0;QD=30.69;ReadPosRankSum=-0.431;SOR=2.049	0/0	0/0	0/0	0/0	0/0	1/1	1/1	0/0	0/0	0/0	0/1	0/0	0/0	1/1	0/0	0/0	./.	0/0	0/0	0/0	0/0	0/0	0/0	./.	./.	0/0	0/0	0/0	0/0	0/0	0/0	0/0	0/0	1/1	0/0	0/0	0/0	0/0	0/0	./.	1/1	0/0	./.	1/1
1	269525677	DEL-1-269525677	GCTTCA	G	AC=21;AF=0.146;AN=144;BaseQRankSum=0;CSQ=-|upstream_gene_variant|MODIFIER||Zm00001d033645|Transcript|Zm00001d033645_T001|protein_coding|||||||||||426|1|||;DP=332;ExcessHet=0;FS=3.522;InbreedingCoeff=0.5822;MLEAC=17;MLEAF=0.118;MQ=59.57;MQRankSum=0;QD=31.53;ReadPosRankSum=0.524;SOR=2.226	0/0	0/0	0/0	0/0	0/0	1/1	1/1	0/0	0/0	0/0	0/1	0/0	0/0	1/1	0/0	0/0	./.	0/0	0/0	0/0	0/0	0/0	0/0	./.	./.	0/0	0/0	0/0	0/0	0/0	0/0	0/0	0/0	1/1	0/0	0/0	0/0	0/0	0/0	./.	1/1	0/0	./.	1/1
1	269526061	INS-1-269526061	G	GA	AC=29;AF=0.193;AN=150;BaseQRankSum=0.253;CSQ=A|upstream_gene_variant|MODIFIER||Zm00001d033645|Transcript|Zm00001d033645_T001|protein_coding|||||||||||46|1|||;DP=321;ExcessHet=0;FS=0;InbreedingCoeff=0.6318;MLEAC=27;MLEAF=0.18;MQ=60;MQRankSum=0;QD=25.27;ReadPosRankSum=-0.524;SOR=0.436	1/1	0/0	0/0	1/1	0/0	0/0	1/1	0/0	0/0	0/1	1/1	0/0	1/1	1/1	0/0	0/0	0/0	0/0	./.	./.	0/0	0/0	0/0	1/1	1/1	0/0	0/0	0/0	0/0	0/0	0/0	0/0	0/0	1/1	0/0	0/0	0/0	0/0	0/0	0/0	0/0	0/0	./.	1/1
1	269526077	SNP-1-269526077	C	T	AC=32;AF=0.213;AN=150;CSQ=T|upstream_gene_variant|MODIFIER||Zm00001d033645|Transcript|Zm00001d033645_T001|protein_coding|||||||||||31|1|||;DP=321;ExcessHet=0;FS=0;InbreedingCoeff=0.6644;MLEAC=30;MLEAF=0.2;MQ=60;QD=22.99;SOR=2.001	0/0	0/0	0/0	0/0	0/0	1/1	1/1	0/0	0/0	0/0	1/1	0/0	0/0	1/1	0/0	0/0	1/1	0/0	./.	./.	0/0	0/0	0/0	1/1	1/1	0/0	0/0	0/0	0/0	0/0	0/0	0/0	0/0	0/0	0/0	0/0	0/0	0/0	0/0	1/1	1/1	0/0	./.	1/1
1	269526165	DEL-1-269526165	CCTT	C	AC=12;AF=0.078;AN=154;CSQ=-|5_prime_UTR_variant|MODIFIER||Zm00001d033645|Transcript|Zm00001d033645_T001|protein_coding|1/10||||59-61|||||||1|||;DP=293;ExcessHet=0;FS=0;InbreedingCoeff=0.4789;MLEAC=9;MLEAF=0.058;MQ=60;QD=26.22;SOR=0.793	0/0	0/0	0/0	0/0	0/0	0/0	0/0	0/0	0/0	0/0	0/0	1/1	0/0	0/0	0/0	0/0	0/0	0/0	0/0	./.	0/0	0/0	1/1	0/0	0/0	0/0	0/0	0/0	0/0	./.	0/0	0/0	1/1	0/0	0/0	0/0	0/0	0/0	0/0	0/0	0/0	0/0	1/1	0/0
1	269526216	SNP-1-269526216	C	T	AC=33;AF=0.214;AN=154;BaseQRankSum=-1.383;CSQ=T|5_prime_UTR_variant|MODIFIER||Zm00001d033645|Transcript|Zm00001d033645_T001|protein_coding|1/10||||109|||||||1|||;DP=317;ExcessHet=0;FS=0;InbreedingCoeff=0.632;MLEAC=32;MLEAF=0.208;MQ=60;MQRankSum=0;QD=24.68;ReadPosRankSum=0.674;SOR=0.814	0/0	0/0	0/0	0/0	0/0	1/1	1/1	0/0	0/0	0/0	0/1	./.	0/0	1/1	0/0	0/0	1/1	0/0	0/0	0/0	0/0	0/0	0/0	1/1	1/1	0/0	0/0	0/0	0/0	0/0	0/0	0/0	0/0	0/0	0/0	0/0	0/0	0/0	0/0	1/1	1/1	0/0	1/1	1/1
1	269526307	SNP-1-269526307	T	G	AC=64;AF=0.421;AN=152;BaseQRankSum=1.83;CSQ=G|5_prime_UTR_variant|MODIFIER||Zm00001d033645|Transcript|Zm00001d033645_T001|protein_coding|1/10||||200|||||||1|||;DP=382;ExcessHet=0;FS=0;InbreedingCoeff=0.7429;MLEAC=67;MLEAF=0.441;MQ=60;MQRankSum=0;QD=25.69;ReadPosRankSum=-0.241;SOR=0.564	1/1	1/1	1/1	1/1	1/1	0/0	0/0	0/0	1/1	0/1	0/1	1/1	1/1	0/0	0/0	1/1	0/0	1/1	0/0	1/1	0/0	1/1	1/1	0/0	0/0	1/1	1/1	1/1	./.	./.	0/0	0/0	1/1	1/1	0/0	0/0	0/0	1/1	./.	0/0	0/0	0/0	0/0	0/0
1	269526437	SNP-1-269526437	C	A	AC=11;AF=0.071;AN=154;BaseQRankSum=0;CSQ=A|intron_variant|MODIFIER||Zm00001d033645|Transcript|Zm00001d033645_T001|protein_coding||1/9||||||||||1|||;DP=319;ExcessHet=0;FS=0;InbreedingCoeff=0.4694;MLEAC=9;MLEAF=0.058;MQ=60;MQRankSum=0;QD=18.52;ReadPosRankSum=0;SOR=1.329	0/0	0/0	0/0	0/0	0/0	0/0	0/0	0/0	0/0	0/0	0/1	./.	0/0	0/0	0/0	0/0	0/0	0/0	0/0	0/0	0/0	0/0	1/1	0/0	0/0	0/0	./.	0/0	0/0	1/1	0/0	0/0	1/1	0/0	0/0	0/0	0/0	0/0	0/0	0/0	0/0	0/0	0/0	0/0
1	269526484	SNP-1-269526484	G	A	AC=11;AF=0.071;AN=156;BaseQRankSum=0.253;CSQ=A|intron_variant|MODIFIER||Zm00001d033645|Transcript|Zm00001d033645_T001|protein_coding||1/9||||||||||1|||;DP=310;ExcessHet=0;FS=0;InbreedingCoeff=0.4538;MLEAC=9;MLEAF=0.058;MQ=60;MQRankSum=0;QD=18.34;ReadPosRankSum=-1.645;SOR=0.627	0/0	0/0	0/0	0/0	0/0	0/0	0/0	0/0	./.	0/0	0/1	./.	0/0	0/0	0/0	0/0	0/0	0/0	0/0	0/0	0/0	0/0	1/1	0/0	0/0	0/0	0/0	0/0	0/0	1/1	0/0	0/0	1/1	0/0	0/0	0/0	0/0	0/0	0/0	0/0	0/0	0/0	0/0	0/0
1	269526486	SNP-1-269526486	A	G	AC=44;AF=0.282;AN=156;BaseQRankSum=1.83;CSQ=G|intron_variant|MODIFIER||Zm00001d033645|Transcript|Zm00001d033645_T001|protein_coding||1/9||||||||||1|||;DP=311;ExcessHet=0;FS=9.612;InbreedingCoeff=0.7036;MLEAC=44;MLEAF=0.282;MQ=60;MQRankSum=0;QD=24.94;ReadPosRankSum=1.28;SOR=0.371	1/1	1/1	1/1	1/1	1/1	0/0	0/0	0/0	./.	0/1	0/0	0/0	1/1	0/0	0/0	0/1	0/0	1/1	0/0	1/1	0/0	1/1	0/0	0/0	0/0	1/1	1/1	0/0	0/0	0/0	0/0	0/0	0/0	1/1	0/0	0/0	0/0	0/0	1/1	0/0	0/0	0/0	0/0	0/0
1	269526580	SNP-1-269526580	T	C	AC=16;AF=0.1;AN=160;CSQ=C|intron_variant|MODIFIER||Zm00001d033645|Transcript|Zm00001d033645_T001|protein_coding||1/9||||||||||1|||;DP=383;ExcessHet=0;FS=0;InbreedingCoeff=0.6781;MLEAC=14;MLEAF=0.088;MQ=60;QD=24.22;SOR=1.151	0/0	0/0	0/0	0/0	0/0	1/1	0/0	0/0	0/0	0/0	0/0	0/0	0/0	0/0	0/0	0/0	1/1	0/0	0/0	0/0	0/0	0/0	0/0	0/0	0/0	0/0	0/0	0/0	0/0	0/0	0/0	0/0	0/0	0/0	0/0	0/0	0/0	0/0	0/0	1/1	1/1	0/0	0/0	0/0
1	269526657	DEL-1-269526657	GT	G	AC=63;AF=0.404;AN=156;BaseQRankSum=0.18;CSQ=-|intron_variant|MODIFIER||Zm00001d033645|Transcript|Zm00001d033645_T001|protein_coding||1/9||||||||||1|||;DP=373;ExcessHet=0;FS=4.854;InbreedingCoeff=0.7595;MLEAC=63;MLEAF=0.404;MQ=60;MQRankSum=0;QD=24.49;ReadPosRankSum=0;SOR=0.404	1/1	1/1	1/1	1/1	1/1	0/0	0/0	0/0	1/1	0/1	0/1	1/1	1/1	0/0	0/0	1/1	0/0	1/1	0/0	1/1	0/0	1/1	1/1	0/0	0/0	1/1	0/1	0/0	0/0	1/1	0/0	0/0	1/1	1/1	0/0	0/0	0/0	0/0	1/1	0/0	0/0	0/0	1/1	0/0
1	269526699	SNP-1-269526699	T	C	AC=56;AF=0.359;AN=156;BaseQRankSum=1.28;CSQ=C|intron_variant|MODIFIER||Zm00001d033645|Transcript|Zm00001d033645_T001|protein_coding||1/9||||||||||1|||;DP=402;ExcessHet=0;FS=1.214;InbreedingCoeff=0.747;MLEAC=57;MLEAF=0.365;MQ=58.85;MQRankSum=1.38;QD=25.22;ReadPosRankSum=0.674;SOR=0.743	1/1	1/1	./.	1/1	1/1	0/0	0/0	0/0	1/1	0/1	0/1	1/1	./.	0/0	0/0	1/1	0/0	1/1	0/0	1/1	0/0	1/1	1/1	0/0	0/0	1/1	1/1	0/0	0/0	1/1	0/0	0/0	1/1	1/1	0/0	0/0	0/0	0/0	1/1	0/0	0/0	0/0	0/0	0/0
1	269526722	SNP-1-269526722	G	A	AC=8;AF=0.052;AN=154;BaseQRankSum=-1.593;CSQ=A|intron_variant|MODIFIER||Zm00001d033645|Transcript|Zm00001d033645_T001|protein_coding||1/9||||||||||1|||;DP=395;ExcessHet=0.8304;FS=3.586;InbreedingCoeff=0.044;MLEAC=9;MLEAF=0.058;MQ=54.71;MQRankSum=-1.645;QD=7.8;ReadPosRankSum=0.674;SOR=1.246	0/0	0/1	0/1	0/0	0/1	0/0	./.	0/0	0/1	0/0	0/0	0/0	./.	0/0	0/0	0/0	0/0	0/0	0/0	0/0	0/0	0/1	0/0	0/0	0/0	0/0	0/0	0/0	0/0	0/0	0/0	0/0	0/0	0/0	0/0	0/0	0/0	0/0	0/0	0/0	0/0	0/0	0/0	0/0
1	269526746	INS-1-269526746	T	TAAC	AC=9;AF=0.056;AN=160;BaseQRankSum=0;CSQ=AAC|intron_variant|MODIFIER||Zm00001d033645|Transcript|Zm00001d033645_T001|protein_coding||1/9||||||||||1|||;DP=395;ExcessHet=1.0463;FS=1.046;InbreedingCoeff=-0.1009;MLEAC=10;MLEAF=0.063;MQ=52.77;MQRankSum=-1.834;QD=17.23;ReadPosRankSum=0.549;SOR=0.975	0/0	0/1	0/1	0/0	0/1	0/0	0/0	0/0	0/1	0/0	0/0	0/0	0/0	0/0	0/0	0/0	0/0	0/0	0/0	0/0	0/0	0/1	0/0	0/0	0/0	0/0	0/0	0/1	0/0	0/0	0/0	0/0	0/0	0/0	0/0	0/0	0/0	0/0	0/0	0/0	0/0	0/0	0/0	0/0
1	269526759	SNP-1-269526759	T	C	AC=13;AF=0.082;AN=158;BaseQRankSum=1.58;CSQ=C|intron_variant|MODIFIER||Zm00001d033645|Transcript|Zm00001d033645_T001|protein_coding||1/9||||||||||1|||;DP=397;ExcessHet=0.3387;FS=4.364;InbreedingCoeff=0.0277;MLEAC=13;MLEAF=0.082;MQ=53.37;MQRankSum=-2.189;QD=11.21;ReadPosRankSum=0.14;SOR=0.35	0/1	0/1	0/1	0/1	0/1	0/0	0/0	0/0	0/1	0/0	0/0	0/0	0/0	0/0	0/0	0/0	0/0	0/0	0/0	0/0	0/0	0/1	0/0	0/0	0/0	0/0	0/0	0/1	0/0	0/0	0/0	0/0	0/0	0/0	0/0	0/0	0/0	0/0	0/0	0/0	0/0	0/0	0/0	0/0
1	269526771	SNP-1-269526771	T	A	AC=13;AF=0.081;AN=160;BaseQRankSum=1.72;CSQ=A|intron_variant|MODIFIER||Zm00001d033645|Transcript|Zm00001d033645_T001|protein_coding||1/9||||||||||1|||;DP=393;ExcessHet=0.3306;FS=4.218;InbreedingCoeff=-0.0093;MLEAC=13;MLEAF=0.081;MQ=53.75;MQRankSum=-2.189;QD=9.71;ReadPosRankSum=0.524;SOR=0.367	0/1	0/1	0/1	0/1	0/1	0/0	0/0	0/0	0/1	0/0	0/0	0/0	0/0	0/0	0/0	0/0	0/0	0/0	0/0	0/0	0/0	0/1	0/0	0/0	0/0	0/0	0/0	0/1	0/0	0/0	0/0	0/0	0/0	0/0	0/0	0/0	0/0	0/0	0/0	0/0	0/0	0/0	0/0	0/0
1	269526831	SNP-1-269526831	C	G	AC=60;AF=0.385;AN=156;BaseQRankSum=-0.431;CSQ=G|intron_variant|MODIFIER||Zm00001d033645|Transcript|Zm00001d033645_T001|protein_coding||1/9||||||||||1|||;DP=360;ExcessHet=0;FS=17.613;InbreedingCoeff=0.7121;MLEAC=62;MLEAF=0.397;MQ=60;MQRankSum=0;QD=32.76;ReadPosRankSum=-0.842;SOR=0.482	1/1	1/1	1/1	1/1	1/1	0/0	0/0	0/0	1/1	0/1	0/1	1/1	1/1	0/0	0/0	1/1	0/0	1/1	0/0	1/1	0/0	1/1	1/1	0/0	0/0	1/1	0/1	0/0	0/0	1/1	0/0	0/0	1/1	1/1	0/0	0/0	0/0	0/0	1/1	0/0	0/0	0/0	1/1	0/0
1	269528053	SNP-1-269528053	G	A	AC=8;AF=0.051;AN=158;CSQ=A|synonymous_variant|LOW||Zm00001d033645|Transcript|Zm00001d033645_T001|protein_coding|3/10||||1220|897|299|L|ttG/ttA|||1|||;DP=375;ExcessHet=0;FS=0;InbreedingCoeff=0.5221;MLEAC=6;MLEAF=0.038;MQ=60;QD=20.97;SOR=1.23	0/0	0/0	0/0	0/0	0/0	0/0	0/0	0/0	0/0	0/0	0/0	0/0	0/0	0/0	./.	0/0	0/0	0/0	0/0	0/0	0/0	0/0	0/0	0/0	0/0	0/0	0/0	1/1	0/0	0/0	0/0	0/0	0/0	0/0	0/0	0/0	0/0	1/1	0/0	0/0	0/0	0/0	0/0	0/0
1	269528308	SNP-1-269528308	A	T	AC=11;AF=0.071;AN=156;BaseQRankSum=-0.466;CSQ=T|intron_variant|MODIFIER||Zm00001d033645|Transcript|Zm00001d033645_T001|protein_coding||3/9||||||||||1|||;DP=366;ExcessHet=0;FS=8.569;InbreedingCoeff=0.5143;MLEAC=9;MLEAF=0.058;MQ=60;MQRankSum=0;QD=21.53;ReadPosRankSum=1.3;SOR=1.176	0/0	0/0	0/0	./.	0/0	0/0	0/0	0/0	0/0	0/0	0/1	1/1	0/0	0/0	0/0	0/0	0/0	0/0	0/0	0/0	0/0	0/0	1/1	0/0	0/0	0/0	0/0	0/0	0/0	1/1	0/0	0/0	./.	0/0	0/0	0/0	0/0	0/0	0/0	0/0	0/0	0/0	0/0	0/0
1	269528546	SNP-1-269528546	C	T	AC=17;AF=0.108;AN=158;BaseQRankSum=-0.674;CSQ=T|intron_variant|MODIFIER||Zm00001d033645|Transcript|Zm00001d033645_T001|protein_coding||3/9||||||||||1|||;DP=381;ExcessHet=0;FS=3.84;InbreedingCoeff=0.6543;MLEAC=15;MLEAF=0.095;MQ=60;MQRankSum=0;QD=21.16;ReadPosRankSum=1.38;SOR=0.884	0/0	0/0	0/0	1/1	0/0	0/0	0/0	0/0	0/0	0/0	1/1	1/1	0/0	0/0	0/0	0/0	0/0	0/0	0/0	0/0	0/0	0/0	1/1	0/0	0/0	./.	0/0	0/0	0/0	0/1	0/0	0/0	1/1	0/0	0/0	0/0	0/0	0/0	0/0	0/0	0/0	0/0	1/1	0/0
1	269528793	SNP-1-269528793	C	T	AC=14;AF=0.091;AN=154;BaseQRankSum=0.589;CSQ=T|intron_variant|MODIFIER||Zm00001d033645|Transcript|Zm00001d033645_T001|protein_coding||3/9||||||||||1|||;DP=360;ExcessHet=0;FS=0;InbreedingCoeff=0.5754;MLEAC=13;MLEAF=0.084;MQ=60;MQRankSum=0;QD=21.19;ReadPosRankSum=0.967;SOR=0.968	0/0	0/0	0/0	1/1	0/0	0/0	0/0	0/0	0/0	0/0	0/1	1/1	0/0	0/0	0/0	0/0	0/0	0/0	0/0	0/0	0/0	0/0	1/1	./.	0/0	0/0	0/0	0/0	0/0	1/1	0/0	0/0	1/1	0/0	0/0	0/0	0/0	0/0	0/0	0/0	0/0	0/0	0/0	0/0
1	269529021	SNP-1-269529021	C	A	AC=17;AF=0.108;AN=158;BaseQRankSum=1.15;CSQ=A|intron_variant|MODIFIER||Zm00001d033645|Transcript|Zm00001d033645_T001|protein_coding||3/9||||||||||1|||;DP=402;ExcessHet=0;FS=0;InbreedingCoeff=0.6308;MLEAC=16;MLEAF=0.101;MQ=60;MQRankSum=0;QD=21.98;ReadPosRankSum=-1.15;SOR=0.368	0/0	0/0	0/0	1/1	0/0	0/0	0/0	0/0	0/0	0/0	0/1	1/1	./.	0/0	0/0	0/0	0/0	0/0	0/0	0/0	0/0	0/0	1/1	0/0	0/0	0/0	0/0	0/0	0/0	1/1	0/0	0/0	1/1	0/0	0/0	0/0	0/0	0/0	0/0	0/0	0/0	0/0	1/1	0/0
1	269529157	SNP-1-269529157	A	T	AC=14;AF=0.091;AN=154;BaseQRankSum=1.65;CSQ=T|intron_variant|MODIFIER||Zm00001d033645|Transcript|Zm00001d033645_T001|protein_coding||3/9||||||||||1|||;DP=345;ExcessHet=0;FS=2.684;InbreedingCoeff=0.4708;MLEAC=14;MLEAF=0.091;MQ=60;MQRankSum=0;QD=20.56;ReadPosRankSum=0;SOR=0.172	0/0	0/0	0/0	1/1	0/0	0/0	0/0	0/0	0/0	0/0	0/1	1/1	0/0	0/0	0/0	0/0	0/0	0/0	0/0	0/0	0/0	0/0	1/1	0/0	0/0	0/0	0/0	0/0	0/0	1/1	0/0	0/0	0/1	0/0	0/0	0/0	0/0	0/0	0/0	0/0	0/0	0/0	1/1	0/0
1	269529568	SNP-1-269529568	T	A	AC=16;AF=0.1;AN=160;BaseQRankSum=0.741;CSQ=A|intron_variant|MODIFIER||Zm00001d033645|Transcript|Zm00001d033645_T001|protein_coding||4/9||||||||||1|||;DP=414;ExcessHet=0;FS=4.028;InbreedingCoeff=0.5552;MLEAC=13;MLEAF=0.081;MQ=60;MQRankSum=0;QD=18.73;ReadPosRankSum=1.28;SOR=0.689	0/0	0/0	0/0	1/1	0/0	0/0	0/0	0/0	0/0	0/0	0/1	1/1	0/0	0/0	0/0	0/0	0/0	0/0	0/0	0/0	0/0	0/0	1/1	0/0	0/0	0/0	0/0	0/0	0/0	1/1	0/0	0/0	1/1	0/0	0/0	0/0	0/0	0/0	0/0	0/0	0/0	0/0	0/1	0/0
1	269529879	SNP-1-269529879	C	T	AC=11;AF=0.07;AN=158;BaseQRankSum=-1.036;CSQ=T|intron_variant|MODIFIER||Zm00001d033645|Transcript|Zm00001d033645_T001|protein_coding||4/9||||||||||1|||;DP=479;ExcessHet=1.6431;FS=9.91;InbreedingCoeff=-0.0818;MLEAC=12;MLEAF=0.076;MQ=48.41;MQRankSum=-1.981;QD=12.34;ReadPosRankSum=-0.431;SOR=1.097	0/0	0/0	0/0	0/0	0/0	0/1	0/0	0/0	0/0	0/0	0/0	0/0	0/0	0/0	0/0	0/0	0/1	0/0	0/0	0/0	0/0	0/0	0/0	0/0	0/0	0/0	0/0	0/0	0/0	0/0	0/0	0/0	0/0	0/0	0/0	0/0	0/0	0/0	0/0	0/1	0/1	0/0	0/0	0/0
1	269529888	SNP-1-269529888	C	T	AC=11;AF=0.07;AN=158;BaseQRankSum=-1.15;CSQ=T|intron_variant|MODIFIER||Zm00001d033645|Transcript|Zm00001d033645_T001|protein_coding||4/9||||||||||1|||;DP=468;ExcessHet=1.6431;FS=10.692;InbreedingCoeff=-0.0873;MLEAC=12;MLEAF=0.076;MQ=49.28;MQRankSum=-1.981;QD=12.79;ReadPosRankSum=0;SOR=1.296	0/0	0/0	0/0	0/0	0/0	0/1	0/0	0/0	0/0	0/0	0/0	0/0	0/0	0/0	0/0	0/0	0/1	0/0	0/0	0/0	0/0	0/0	0/0	0/0	0/0	0/0	0/0	0/0	0/0	0/0	0/0	0/0	0/0	0/0	0/0	0/0	0/0	./.	0/0	0/1	0/1	0/0	0/0	0/0
1	269529894	SNP-1-269529894	G	A	AC=11;AF=0.069;AN=160;BaseQRankSum=-1.429;CSQ=A|intron_variant|MODIFIER||Zm00001d033645|Transcript|Zm00001d033645_T001|protein_coding||4/9||||||||||1|||;DP=460;ExcessHet=1.6208;FS=9.549;InbreedingCoeff=-0.1218;MLEAC=12;MLEAF=0.075;MQ=49.57;MQRankSum=-1.834;QD=14.33;ReadPosRankSum=0.792;SOR=1.254	0/0	0/0	0/0	0/0	0/0	0/1	0/0	0/0	0/0	0/0	0/0	0/0	0/0	0/0	0/0	0/0	0/1	0/0	0/0	0/0	0/0	0/0	0/0	0/0	0/0	0/0	0/0	0/0	0/0	0/0	0/0	0/0	0/0	0/0	0/0	0/0	0/0	0/0	0/0	0/1	0/1	0/0	0/0	0/0
1	269530029	INS-1-269530029	A	AT	AC=17;AF=0.106;AN=160;BaseQRankSum=0.674;CSQ=T|intron_variant|MODIFIER||Zm00001d033645|Transcript|Zm00001d033645_T001|protein_coding||4/9||||||||||1|||;DP=399;ExcessHet=0;FS=0;InbreedingCoeff=0.6117;MLEAC=16;MLEAF=0.1;MQ=59.94;MQRankSum=0;QD=24.54;ReadPosRankSum=0;SOR=0.733	0/0	0/0	0/0	1/1	0/0	0/0	0/0	0/0	0/0	0/0	0/1	1/1	0/0	0/0	0/0	0/0	0/0	0/0	0/0	0/0	0/0	0/0	1/1	0/0	0/0	0/0	0/0	0/0	0/0	1/1	0/0	0/0	1/1	1/1	0/0	0/0	0/0	0/0	0/0	0/0	0/0	0/0	0/0	0/0
1	269530144	INS-1-269530144	T	TC	AC=14;AF=0.089;AN=158;BaseQRankSum=-0.431;CSQ=C|frameshift_variant|HIGH||Zm00001d033645|Transcript|Zm00001d033645_T001|protein_coding|5/10||||1623-1624|1300-1301|434|S/SX|tcc/tCcc|||1|||;DP=478;ExcessHet=2.739;FS=20.717;InbreedingCoeff=-0.0964;MLEAC=15;MLEAF=0.095;MQ=46.32;MQRankSum=0;QD=19.22;ReadPosRankSum=0.792;SOR=2.409	0/0	0/0	0/1	0/0	0/0	0/0	0/1	0/0	0/0	0/0	0/1	0/0	0/1	0/0	0/0	0/0	0/1	0/0	0/0	0/0	0/0	0/0	./.	0/0	0/0	0/0	0/0	0/0	0/1	0/0	0/1	0/0	0/0	0/0	0/1	0/1	0/0	0/0	0/0	0/0	0/1	0/0	0/0	0/1
1	269530174	SNP-1-269530174	C	A	AC=14;AF=0.09;AN=156;BaseQRankSum=-1.15;CSQ=A|missense_variant|MODERATE||Zm00001d033645|Transcript|Zm00001d033645_T001|protein_coding|5/10||||1653|1330|444|L/I|Ctt/Att|||1|||;DP=485;ExcessHet=2.8172;FS=30.417;InbreedingCoeff=-0.067;MLEAC=12;MLEAF=0.077;MQ=45.45;MQRankSum=0;QD=5.42;ReadPosRankSum=0.674;SOR=2.922	0/1	0/0	0/1	0/0	0/0	0/0	0/1	0/0	0/0	0/0	0/1	0/0	0/1	0/0	0/0	0/0	0/1	0/0	0/0	0/0	0/0	0/0	0/0	0/0	./.	0/0	0/0	0/0	0/0	0/0	0/1	0/0	0/0	0/0	0/0	0/0	0/0	0/0	0/0	0/0	0/1	0/0	0/0	0/1
1	269530717	SNP-1-269530717	C	T	AC=10;AF=0.063;AN=160;BaseQRankSum=0;CSQ=T|missense_variant|MODERATE||Zm00001d033645|Transcript|Zm00001d033645_T001|protein_coding|7/10||||1888|1565|522|T/I|aCt/aTt|||1|||;DP=439;ExcessHet=1.4329;FS=4.354;InbreedingCoeff=-0.1144;MLEAC=8;MLEAF=0.05;MQ=41.53;MQRankSum=-1.282;QD=7.53;ReadPosRankSum=-0.524;SOR=1.63	0/0	0/0	0/0	0/0	0/0	0/0	0/0	0/0	0/0	0/1	0/0	0/0	0/0	0/0	0/0	0/0	0/0	0/0	0/0	0/0	0/1	0/0	0/0	0/1	0/0	0/1	0/0	0/0	0/0	0/0	0/1	0/0	0/0	0/0	0/0	0/1	0/0	0/0	0/0	0/1	0/0	0/0	0/0	0/0
1	269530735	SNP-1-269530735	G	A	AC=12;AF=0.075;AN=160;BaseQRankSum=0;CSQ=A|missense_variant|MODERATE||Zm00001d033645|Transcript|Zm00001d033645_T001|protein_coding|7/10||||1906|1583|528|R/H|cGt/cAt|||1|||;DP=468;ExcessHet=2.166;FS=5.46;InbreedingCoeff=-0.1246;MLEAC=9;MLEAF=0.056;MQ=40.09;MQRankSum=-1.15;QD=8.03;ReadPosRankSum=0;SOR=1.554	0/0	0/0	0/0	0/0	0/0	0/0	0/0	0/0	0/0	0/1	0/0	0/0	0/0	0/0	0/0	0/0	0/0	0/0	0/0	0/0	0/1	0/0	0/0	0/1	0/0	0/1	0/0	0/0	0/0	0/0	0/1	0/0	0/0	0/0	0/1	0/1	0/0	0/0	0/0	0/1	0/0	0/0	0/0	0/0
1	269531178	SNP-1-269531178	T	C	AC=16;AF=0.101;AN=158;CSQ=C|intron_variant|MODIFIER||Zm00001d033645|Transcript|Zm00001d033645_T001|protein_coding||7/9||||||||||1|||;DP=363;ExcessHet=0;FS=0;InbreedingCoeff=0.5871;MLEAC=12;MLEAF=0.076;MQ=60;QD=22.48;SOR=1.863	0/0	0/0	0/0	1/1	0/0	0/0	0/0	0/0	0/0	0/0	./.	1/1	0/0	0/0	0/0	0/0	0/0	0/0	0/0	0/0	0/0	0/0	1/1	0/0	0/0	0/0	0/0	0/0	0/0	1/1	0/0	0/0	1/1	0/0	0/0	0/0	0/0	0/0	0/0	0/0	0/0	0/0	1/1	0/0
1	269531323	SNP-1-269531323	G	A	AC=8;AF=0.053;AN=150;CSQ=A|intron_variant|MODIFIER||Zm00001d033645|Transcript|Zm00001d033645_T001|protein_coding||7/9||||||||||1|||;DP=355;ExcessHet=0;FS=0;InbreedingCoeff=0.5358;MLEAC=7;MLEAF=0.047;MQ=60;QD=20.68;SOR=1.23	./.	0/0	0/0	0/0	0/0	0/0	1/1	0/0	0/0	0/0	0/0	0/0	0/0	0/0	0/0	0/0	0/0	0/0	0/0	0/0	0/0	0/0	0/0	0/0	0/0	./.	0/0	0/0	0/0	./.	0/0	0/0	0/0	0/0	0/0	0/0	0/0	0/0	0/0	0/0	0/0	0/0	0/0	0/0
1	269531571	INS-1-269531571	T	TACCCA	AC=18;AF=0.115;AN=156;CSQ=ACCCA|intron_variant|MODIFIER||Zm00001d033645|Transcript|Zm00001d033645_T001|protein_coding||8/9||||||||||1|||;DP=376;ExcessHet=0;FS=0;InbreedingCoeff=0.6908;MLEAC=16;MLEAF=0.103;MQ=60;QD=30.92;SOR=0.941	0/0	0/0	0/0	1/1	0/0	0/0	0/0	./.	0/0	0/0	0/0	1/1	0/0	0/0	0/0	0/0	0/0	0/0	0/0	0/0	0/0	0/0	1/1	0/0	0/0	0/0	0/0	0/0	0/0	1/1	0/0	0/0	1/1	1/1	0/0	0/0	0/0	0/0	0/0	0/0	0/0	0/0	1/1	0/0
1	269531999	SNP-1-269531999	T	C	AC=16;AF=0.104;AN=154;BaseQRankSum=1.5;CSQ=C|intron_variant|MODIFIER||Zm00001d033645|Transcript|Zm00001d033645_T001|protein_coding||8/9||||||||||1|||;DP=370;ExcessHet=0;FS=0;InbreedingCoeff=0.56;MLEAC=15;MLEAF=0.097;MQ=60;MQRankSum=0;QD=21.23;ReadPosRankSum=0.842;SOR=0.741	0/0	0/0	0/0	1/1	0/0	0/0	0/0	0/0	0/0	0/0	./.	1/1	0/0	0/0	0/0	0/0	0/0	0/0	0/0	0/0	./.	0/0	1/1	0/0	0/0	0/0	0/0	0/0	0/0	1/1	0/0	0/1	1/1	0/0	0/0	0/0	0/0	0/0	0/0	0/0	0/0	0/0	0/1	0/0
1	269532920	SNP-1-269532920	C	T	AC=112;AF=0.709;AN=158;BaseQRankSum=1.16;CSQ=T|3_prime_UTR_variant|MODIFIER||Zm00001d033645|Transcript|Zm00001d033645_T001|protein_coding|10/10||||2663|||||||1|||;DP=410;ExcessHet=0;FS=0;InbreedingCoeff=0.8304;MLEAC=117;MLEAF=0.741;MQ=60;MQRankSum=0;QD=26.88;ReadPosRankSum=-0.475;SOR=0.258	1/1	1/1	1/1	1/1	1/1	1/1	1/1	0/0	1/1	1/1	1/1	1/1	1/1	1/1	0/0	1/1	1/1	1/1	0/0	1/1	0/0	1/1	1/1	1/1	1/1	1/1	1/1	1/1	0/0	1/1	0/0	0/0	1/1	1/1	0/0	0/0	0/0	1/1	1/1	1/1	1/1	0/0	1/1	1/1
1	269551626	SNP-1-269551626	G	A	AC=16;AF=0.101;AN=158;CSQ=A|3_prime_UTR_variant|MODIFIER||Zm00001d033646|Transcript|Zm00001d033646_T001|protein_coding|11/11||||1633|||||||-1|||,A|3_prime_UTR_variant|MODIFIER||Zm00001d033646|Transcript|Zm00001d033646_T002|protein_coding|10/10||||1496|||||||-1|||,A|3_prime_UTR_variant|MODIFIER||Zm00001d033646|Transcript|Zm00001d033646_T003|protein_coding|10/10||||1742|||||||-1|||,A|3_prime_UTR_va…	0/0	0/0	0/0	1/1	0/0	0/0	0/0	0/0	0/0	0/0	0/0	1/1	0/0	0/0	0/0	0/0	0/0	0/0	0/0	0/0	0/0	0/0	1/1	0/0	0/0	0/0	0/0	0/0	0/0	1/1	0/0	./.	1/1	0/0	0/0	0/0	0/0	0/0	0/0	0/0	0/0	0/0	1/1	0/0
1	269552393	SNP-1-269552393	G	T	AC=14;AF=0.093;AN=150;CSQ=T|intron_variant|MODIFIER||Zm00001d033646|Transcript|Zm00001d033646_T001|protein_coding||10/10||||||||||-1|||,T|intron_variant|MODIFIER||Zm00001d033646|Transcript|Zm00001d033646_T002|protein_coding||9/9||||||||||-1|||,T|intron_variant|MODIFIER||Zm00001d033646|Transcript|Zm00001d033646_T003|protein_coding||9/9||||||||||-1|||,T|intron_variant|MODIFIER||Zm00001d033646|Trans…	0/0	0/0	0/0	0/0	0/0	0/0	0/0	0/0	0/0	0/0	0/0	0/0	0/0	0/0	./.	0/0	0/0	1/1	0/0	1/1	0/0	0/0	0/0	0/0	0/0	./.	1/1	0/0	0/0	0/0	0/0	0/0	0/0	0/0	0/0	0/0	0/0	0/0	1/1	0/0	0/0	./.	0/0	0/0
1	269552686	SNP-1-269552686	T	G	AC=18;AF=0.114;AN=158;CSQ=G|intron_variant|MODIFIER||Zm00001d033646|Transcript|Zm00001d033646_T001|protein_coding||10/10||||||||||-1|||,G|intron_variant|MODIFIER||Zm00001d033646|Transcript|Zm00001d033646_T002|protein_coding||9/9||||||||||-1|||,G|intron_variant|MODIFIER||Zm00001d033646|Transcript|Zm00001d033646_T003|protein_coding||9/9||||||||||-1|||,G|intron_variant|MODIFIER||Zm00001d033646|Trans…	0/0	0/0	0/0	0/0	0/0	0/0	0/0	0/0	0/0	0/0	0/0	0/0	0/0	0/0	0/0	0/0	0/0	1/1	0/0	1/1	0/0	0/0	0/0	0/0	0/0	1/1	1/1	0/0	0/0	0/0	0/0	0/0	0/0	0/0	0/0	0/0	0/0	0/0	1/1	0/0	0/0	0/0	0/0	0/0
1	269553629	SNP-1-269553629	G	T	AC=13;AF=0.083;AN=156;BaseQRankSum=-1.645;CSQ=T|intron_variant|MODIFIER||Zm00001d033646|Transcript|Zm00001d033646_T001|protein_coding||7/10||||||||||-1|||,T|intron_variant|MODIFIER||Zm00001d033646|Transcript|Zm00001d033646_T002|protein_coding||7/9||||||||||-1|||,T|intron_variant|MODIFIER||Zm00001d033646|Transcript|Zm00001d033646_T003|protein_coding||7/9||||||||||-1|||,T|intron_variant|MODIFIER||Z…	0/0	0/0	0/0	0/0	0/0	0/0	0/0	0/0	0/0	0/0	0/1	1/1	0/0	./.	0/0	0/0	0/0	0/0	0/0	0/0	0/0	0/0	1/1	0/0	0/0	0/0	0/0	0/0	0/0	1/1	0/0	0/0	1/1	0/0	0/0	0/0	0/0	0/0	0/0	0/0	0/0	0/0	0/0	0/0
1	269553872	SNP-1-269553872	C	T	AC=15;AF=0.096;AN=156;BaseQRankSum=0.226;CSQ=T|intron_variant|MODIFIER||Zm00001d033646|Transcript|Zm00001d033646_T001|protein_coding||6/10||||||||||-1|||,T|intron_variant|MODIFIER||Zm00001d033646|Transcript|Zm00001d033646_T002|protein_coding||6/9||||||||||-1|||,T|intron_variant|MODIFIER||Zm00001d033646|Transcript|Zm00001d033646_T003|protein_coding||6/9||||||||||-1|||,T|intron_variant|MODIFIER||Zm…	0/0	0/0	0/0	1/1	0/0	0/0	0/0	0/0	0/0	1/1	0/1	1/1	0/0	0/0	0/0	0/0	0/0	0/0	0/0	0/0	0/0	0/0	1/1	0/0	0/0	0/0	0/0	0/0	0/0	1/1	0/0	0/0	1/1	0/0	0/0	0/0	0/0	0/0	0/0	0/0	0/0	0/0	0/0	0/0
1	269554063	SNP-1-269554063	T	A	AC=15;AF=0.095;AN=158;BaseQRankSum=0.524;CSQ=A|intron_variant|MODIFIER||Zm00001d033646|Transcript|Zm00001d033646_T001|protein_coding||6/10||||||||||-1|||,A|intron_variant|MODIFIER||Zm00001d033646|Transcript|Zm00001d033646_T002|protein_coding||6/9||||||||||-1|||,A|intron_variant|MODIFIER||Zm00001d033646|Transcript|Zm00001d033646_T003|protein_coding||6/9||||||||||-1|||,A|intron_variant|MODIFIER||Zm…	0/0	0/0	0/0	1/1	0/0	0/0	0/0	0/0	0/0	0/0	0/1	1/1	0/0	0/0	0/0	0/0	0/0	0/0	0/0	0/0	0/0	0/0	1/1	0/0	0/0	0/0	0/0	0/0	0/0	1/1	0/0	0/0	1/1	0/0	0/0	0/0	0/0	0/0	0/0	0/0	0/0	0/0	0/0	0/0
1	269554239	SNP-1-269554239	C	T	AC=15;AF=0.094;AN=160;BaseQRankSum=-1.645;CSQ=T|intron_variant|MODIFIER||Zm00001d033646|Transcript|Zm00001d033646_T001|protein_coding||6/10||||||||||-1|||,T|intron_variant|MODIFIER||Zm00001d033646|Transcript|Zm00001d033646_T002|protein_coding||6/9||||||||||-1|||,T|intron_variant|MODIFIER||Zm00001d033646|Transcript|Zm00001d033646_T003|protein_coding||6/9||||||||||-1|||,T|intron_variant|MODIFIER||Z…	0/0	0/0	0/0	1/1	0/0	0/0	0/0	0/0	0/0	0/1	0/1	1/1	0/0	0/0	0/0	0/0	0/0	0/0	0/0	0/0	0/0	0/0	1/1	0/0	0/0	0/0	0/0	0/0	0/0	0/1	0/0	0/0	1/1	0/0	0/0	0/0	0/0	0/0	0/0	0/0	0/0	0/0	0/0	0/0
1	269554596	SNP-1-269554596	C	T	AC=16;AF=0.1;AN=160;BaseQRankSum=-0.385;CSQ=T|intron_variant|MODIFIER||Zm00001d033646|Transcript|Zm00001d033646_T001|protein_coding||5/10||||||||||-1|||,T|intron_variant|MODIFIER||Zm00001d033646|Transcript|Zm00001d033646_T002|protein_coding||5/9||||||||||-1|||,T|intron_variant|MODIFIER||Zm00001d033646|Transcript|Zm00001d033646_T003|protein_coding||5/9||||||||||-1|||,T|intron_variant|MODIFIER||Zm0…	0/0	0/0	0/0	1/1	0/0	0/0	0/0	0/0	0/0	0/1	0/1	1/1	0/0	0/0	0/0	0/0	0/0	0/0	0/0	0/0	0/0	0/0	1/1	0/0	0/0	0/0	0/0	0/0	0/0	1/1	0/0	0/0	1/1	0/0	0/0	0/0	0/0	0/0	0/0	0/0	0/0	0/0	0/0	0/0
1	269555001	SNP-1-269555001	A	T	AC=15;AF=0.095;AN=158;BaseQRankSum=-0.524;CSQ=T|intron_variant|MODIFIER||Zm00001d033646|Transcript|Zm00001d033646_T001|protein_coding||5/10||||||||||-1|||,T|intron_variant|MODIFIER||Zm00001d033646|Transcript|Zm00001d033646_T002|protein_coding||5/9||||||||||-1|||,T|intron_variant|MODIFIER||Zm00001d033646|Transcript|Zm00001d033646_T003|protein_coding||5/9||||||||||-1|||,T|intron_variant|MODIFIER||Z…	0/0	0/0	0/0	./.	0/0	0/0	0/0	0/0	0/0	0/0	0/1	1/1	0/0	0/0	0/0	0/0	0/0	0/0	0/0	0/0	0/0	0/0	1/1	0/0	0/0	0/0	0/0	0/0	0/0	1/1	0/0	0/0	1/1	0/0	0/0	0/0	0/0	0/0	0/0	0/0	0/0	0/0	1/1	0/0
1	269555256	SNP-1-269555256	A	C	AC=12;AF=0.078;AN=154;BaseQRankSum=1.83;CSQ=C|intron_variant|MODIFIER||Zm00001d033646|Transcript|Zm00001d033646_T001|protein_coding||4/10||||||||||-1|||,C|intron_variant|MODIFIER||Zm00001d033646|Transcript|Zm00001d033646_T002|protein_coding||4/9||||||||||-1|||,C|intron_variant|MODIFIER||Zm00001d033646|Transcript|Zm00001d033646_T003|protein_coding||4/9||||||||||-1|||,C|intron_variant|MODIFIER||Zm0…	0/0	0/0	0/0	1/1	0/0	0/0	0/0	0/0	0/0	0/1	0/1	1/1	0/0	0/0	0/0	0/0	0/0	0/0	0/0	0/0	0/0	0/0	./.	0/0	0/0	0/0	0/0	0/0	0/0	1/1	0/0	0/0	1/1	0/0	0/0	0/0	0/0	0/0	0/0	0/0	0/0	0/0	0/0	0/0
1	269555845	SNP-1-269555845	C	A	AC=10;AF=0.067;AN=150;BaseQRankSum=-1.15;CSQ=A|intron_variant|MODIFIER||Zm00001d033646|Transcript|Zm00001d033646_T001|protein_coding||1/10||||||||||-1|||,A|intron_variant|MODIFIER||Zm00001d033646|Transcript|Zm00001d033646_T002|protein_coding||1/9||||||||||-1|||,A|intron_variant|MODIFIER||Zm00001d033646|Transcript|Zm00001d033646_T003|protein_coding||1/9||||||||||-1|||,A|intron_variant|MODIFIER||Zm…	0/0	0/0	0/0	0/0	0/0	./.	0/0	0/0	0/0	0/0	0/1	1/1	0/0	0/0	0/0	0/0	0/0	0/0	./.	0/0	0/0	0/0	0/1	0/0	0/0	0/0	0/0	0/0	0/0	1/1	0/0	0/0	1/1	0/0	0/0	0/0	0/0	0/0	0/0	0/0	0/0	0/0	0/0	0/0
1	269555896	SNP-1-269555896	G	A	AC=10;AF=0.064;AN=156;CSQ=A|synonymous_variant|LOW||Zm00001d033646|Transcript|Zm00001d033646_T001|protein_coding|1/11||||169|72|24|R|cgC/cgT|||-1|||,A|synonymous_variant|LOW||Zm00001d033646|Transcript|Zm00001d033646_T002|protein_coding|1/10||||169|72|24|R|cgC/cgT|||-1|||,A|synonymous_variant|LOW||Zm00001d033646|Transcript|Zm00001d033646_T003|protein_coding|1/10||||169|72|24|R|cgC/cgT|||-1|||,A|sy…	0/0	0/0	0/0	0/0	0/0	0/0	0/0	0/0	0/0	0/0	0/0	1/1	0/0	0/0	0/0	0/0	0/0	0/0	0/0	0/0	0/0	0/0	1/1	0/0	0/0	0/0	0/0	0/0	0/0	./.	0/0	0/0	1/1	0/0	0/0	0/0	0/0	0/0	0/0	0/0	0/0	0/0	0/0	0/0
1	269556066	INS-1-269556066	G	GTA	AC=14;AF=0.089;AN=158;CSQ=TA|upstream_gene_variant|MODIFIER||Zm00001d033646|Transcript|Zm00001d033646_T001|protein_coding|||||||||||2|-1|||,TA|upstream_gene_variant|MODIFIER||Zm00001d033646|Transcript|Zm00001d033646_T002|protein_coding|||||||||||2|-1|||,TA|upstream_gene_variant|MODIFIER||Zm00001d033646|Transcript|Zm00001d033646_T003|protein_coding|||||||||||2|-1|||,TA|upstream_gene_variant|MODIFI…	0/0	0/0	0/0	0/0	0/0	0/0	0/0	0/0	0/0	0/0	0/0	1/1	0/0	0/0	0/0	0/0	0/0	0/0	0/0	0/0	0/0	0/0	1/1	0/0	0/0	0/0	0/0	0/0	0/0	1/1	0/0	0/0	1/1	0/0	0/0	0/0	0/0	0/0	0/0	0/0	0/0	0/0	1/1	0/0
1	269556092	SNP-1-269556092	C	G	AC=15;AF=0.096;AN=156;BaseQRankSum=0;CSQ=G|upstream_gene_variant|MODIFIER||Zm00001d033646|Transcript|Zm00001d033646_T001|protein_coding|||||||||||28|-1|||,G|upstream_gene_variant|MODIFIER||Zm00001d033646|Transcript|Zm00001d033646_T002|protein_coding|||||||||||28|-1|||,G|upstream_gene_variant|MODIFIER||Zm00001d033646|Transcript|Zm00001d033646_T003|protein_coding|||||||||||28|-1|||,G|upstream_gene_…	0/0	0/0	0/0	0/0	0/0	0/0	0/0	0/0	0/0	./.	0/1	1/1	0/0	0/0	0/0	0/0	0/0	0/0	0/0	0/0	0/0	0/0	1/1	0/0	0/0	0/0	0/0	0/0	0/0	1/1	0/0	0/0	1/1	0/0	0/0	0/0	0/0	0/0	0/0	0/0	0/0	0/0	1/1	0/0
1	269556194	INS-1-269556194	A	AGCAAAGT	AC=12;AF=0.078;AN=154;BaseQRankSum=1.28;CSQ=GCAAAGT|upstream_gene_variant|MODIFIER||Zm00001d033646|Transcript|Zm00001d033646_T001|protein_coding|||||||||||130|-1|||,GCAAAGT|upstream_gene_variant|MODIFIER||Zm00001d033646|Transcript|Zm00001d033646_T002|protein_coding|||||||||||130|-1|||,GCAAAGT|upstream_gene_variant|MODIFIER||Zm00001d033646|Transcript|Zm00001d033646_T003|protein_coding|||||||||||13…	0/0	0/0	0/0	0/0	0/0	0/0	0/0	0/0	0/0	0/0	0/1	1/1	0/0	0/0	0/0	0/0	0/0	0/0	0/0	0/0	0/0	0/0	1/1	0/0	0/0	0/0	0/0	0/0	0/0	1/1	./.	0/0	1/1	0/0	0/0	0/0	0/0	0/0	0/0	0/0	0/0	0/0	./.	0/0
1	269556208	SNP-1-269556208	T	C	AC=12;AF=0.078;AN=154;BaseQRankSum=1.28;CSQ=C|upstream_gene_variant|MODIFIER||Zm00001d033646|Transcript|Zm00001d033646_T001|protein_coding|||||||||||144|-1|||,C|upstream_gene_variant|MODIFIER||Zm00001d033646|Transcript|Zm00001d033646_T002|protein_coding|||||||||||144|-1|||,C|upstream_gene_variant|MODIFIER||Zm00001d033646|Transcript|Zm00001d033646_T003|protein_coding|||||||||||144|-1|||,C|upstream…	0/0	0/0	0/0	0/0	0/0	0/0	0/0	0/0	0/0	0/0	0/1	1/1	0/0	0/0	0/0	0/0	0/0	0/0	0/0	0/0	0/0	0/0	1/1	0/0	0/0	0/0	0/0	0/0	0/0	1/1	./.	0/0	1/1	0/0	0/0	0/0	0/0	0/0	0/0	0/0	0/0	0/0	./.	0/0
1	269556238	SNP-1-269556238	C	T	AC=12;AF=0.075;AN=160;BaseQRankSum=1.65;CSQ=T|upstream_gene_variant|MODIFIER||Zm00001d033646|Transcript|Zm00001d033646_T001|protein_coding|||||||||||174|-1|||,T|upstream_gene_variant|MODIFIER||Zm00001d033646|Transcript|Zm00001d033646_T002|protein_coding|||||||||||174|-1|||,T|upstream_gene_variant|MODIFIER||Zm00001d033646|Transcript|Zm00001d033646_T003|protein_coding|||||||||||174|-1|||,T|upstream…	0/0	0/0	0/0	0/0	0/0	0/0	0/0	0/0	0/0	0/0	0/1	1/1	0/0	0/0	0/0	0/0	0/0	0/0	0/0	0/0	0/0	0/0	1/1	0/0	0/0	0/0	0/0	0/0	0/0	1/1	0/0	0/0	1/1	0/0	0/0	0/0	0/0	0/0	0/0	0/0	0/0	0/0	0/0	0/0
1	269556311	INS-1-269556311	G	GTCAGAGTC	AC=12;AF=0.075;AN=160;BaseQRankSum=-0.674;CSQ=TCAGAGTC|upstream_gene_variant|MODIFIER||Zm00001d033646|Transcript|Zm00001d033646_T001|protein_coding|||||||||||247|-1|||,TCAGAGTC|upstream_gene_variant|MODIFIER||Zm00001d033646|Transcript|Zm00001d033646_T002|protein_coding|||||||||||247|-1|||,TCAGAGTC|upstream_gene_variant|MODIFIER||Zm00001d033646|Transcript|Zm00001d033646_T003|protein_coding||||||||…	0/0	0/0	0/0	0/0	0/0	0/0	0/0	0/0	0/0	0/0	0/1	1/1	0/0	0/0	0/0	0/0	0/0	0/0	0/0	0/0	0/0	0/0	1/1	0/0	0/0	0/0	0/0	0/0	0/0	1/1	0/0	0/0	1/1	0/0	0/0	0/0	0/0	0/0	0/0	0/0	0/0	0/0	0/0	0/0
1	269556354	INS-1-269556354	T	TC	AC=13;AF=0.082;AN=158;BaseQRankSum=-0.135;CSQ=C|upstream_gene_variant|MODIFIER||Zm00001d033646|Transcript|Zm00001d033646_T001|protein_coding|||||||||||290|-1|||,C|upstream_gene_variant|MODIFIER||Zm00001d033646|Transcript|Zm00001d033646_T002|protein_coding|||||||||||290|-1|||,C|upstream_gene_variant|MODIFIER||Zm00001d033646|Transcript|Zm00001d033646_T003|protein_coding|||||||||||290|-1|||,C|upstre…	0/0	0/0	0/0	0/0	0/0	0/0	0/0	0/0	0/0	0/0	0/1	1/1	0/0	0/0	0/0	0/0	0/0	0/0	0/0	0/0	0/0	0/0	1/1	0/0	0/0	0/0	0/0	0/0	0/0	./.	0/0	0/0	1/1	0/0	0/0	0/0	0/0	0/0	0/0	0/0	0/0	0/0	1/1	0/0
1	269556402	DEL-1-269556402	TGGCGGCGGC	T	AC=11;AF=0.071;AN=156;BaseQRankSum=0.447;CSQ=-|upstream_gene_variant|MODIFIER||Zm00001d033646|Transcript|Zm00001d033646_T001|protein_coding|||||||||||339|-1|||,-|upstream_gene_variant|MODIFIER||Zm00001d033646|Transcript|Zm00001d033646_T002|protein_coding|||||||||||339|-1|||,-|upstream_gene_variant|MODIFIER||Zm00001d033646|Transcript|Zm00001d033646_T003|protein_coding|||||||||||339|-1|||,-|upstrea…	0/0	0/0	0/0	0/0	0/0	0/0	0/0	0/0	0/0	0/0	0/1	1/1	0/0	0/0	0/0	0/0	0/0	0/0	0/0	0/0	0/0	0/0	1/1	0/0	0/0	0/0	0/0	0/0	0/0	./.	0/0	0/0	./.	0/0	0/0	0/0	0/0	0/0	0/0	0/0	0/0	0/0	1/1	0/0
1	269556451	DEL-1-269556451	AGAG	A	AC=11;AF=0.071;AN=156;BaseQRankSum=0.921;CSQ=-|upstream_gene_variant|MODIFIER||Zm00001d033646|Transcript|Zm00001d033646_T001|protein_coding|||||||||||388|-1|||,-|upstream_gene_variant|MODIFIER||Zm00001d033646|Transcript|Zm00001d033646_T002|protein_coding|||||||||||388|-1|||,-|upstream_gene_variant|MODIFIER||Zm00001d033646|Transcript|Zm00001d033646_T003|protein_coding|||||||||||388|-1|||,-|upstrea…	0/0	0/0	0/0	0/0	0/0	0/0	0/0	0/0	0/0	0/0	0/1	1/1	0/0	0/0	0/0	0/0	0/0	0/0	0/0	0/0	0/0	0/0	1/1	0/0	0/0	0/0	0/0	0/0	0/0	1/1	0/0	0/0	./.	0/0	0/0	0/0	0/0	0/0	0/0	0/0	0/0	0/0	./.	0/0
1	269556568	SNP-1-269556568	G	C	AC=16;AF=0.101;AN=158;CSQ=C|upstream_gene_variant|MODIFIER||Zm00001d033646|Transcript|Zm00001d033646_T001|protein_coding|||||||||||504|-1|||,C|upstream_gene_variant|MODIFIER||Zm00001d033646|Transcript|Zm00001d033646_T002|protein_coding|||||||||||504|-1|||,C|upstream_gene_variant|MODIFIER||Zm00001d033646|Transcript|Zm00001d033646_T003|protein_coding|||||||||||504|-1|||,C|upstream_gene_variant|MODI…	0/0	0/0	0/0	0/0	./.	0/0	0/0	0/0	0/0	0/0	1/1	1/1	0/0	0/0	0/0	0/0	0/0	0/0	0/0	0/0	0/0	0/0	1/1	0/0	0/0	0/0	0/0	0/0	0/0	1/1	0/0	0/0	1/1	0/0	0/0	0/0	0/0	0/0	0/0	0/0	0/0	0/0	1/1	0/0
1	269556697	SNP-1-269556697	C	G	AC=13;AF=0.083;AN=156;BaseQRankSum=1.35;CSQ=G|upstream_gene_variant|MODIFIER||Zm00001d033646|Transcript|Zm00001d033646_T001|protein_coding|||||||||||633|-1|||,G|upstream_gene_variant|MODIFIER||Zm00001d033646|Transcript|Zm00001d033646_T002|protein_coding|||||||||||633|-1|||,G|upstream_gene_variant|MODIFIER||Zm00001d033646|Transcript|Zm00001d033646_T003|protein_coding|||||||||||633|-1|||,G|upstream…	0/0	0/0	./.	0/0	0/0	0/0	0/0	0/0	0/0	0/0	0/1	1/1	0/0	0/0	0/0	0/0	0/0	0/0	0/0	0/0	0/0	0/0	1/1	0/0	0/0	0/0	0/0	0/0	0/0	1/1	./.	0/0	1/1	0/0	0/0	0/0	0/0	0/0	0/0	0/0	0/0	0/0	0/0	0/0
1	269556716	SNP-1-269556716	G	A	AC=13;AF=0.082;AN=158;BaseQRankSum=-1.237;CSQ=A|upstream_gene_variant|MODIFIER||Zm00001d033646|Transcript|Zm00001d033646_T001|protein_coding|||||||||||652|-1|||,A|upstream_gene_variant|MODIFIER||Zm00001d033646|Transcript|Zm00001d033646_T002|protein_coding|||||||||||652|-1|||,A|upstream_gene_variant|MODIFIER||Zm00001d033646|Transcript|Zm00001d033646_T003|protein_coding|||||||||||652|-1|||,A|upstre…	0/0	0/0	./.	0/0	0/0	0/0	0/0	0/0	0/0	0/0	0/1	1/1	0/0	0/0	0/0	0/0	0/0	0/0	0/0	0/0	0/0	0/0	1/1	0/0	0/0	0/0	0/0	0/0	0/0	1/1	0/0	0/0	1/1	0/0	0/0	0/0	0/0	0/0	0/0	0/0	0/0	0/0	0/0	0/0
1	269556773	SNP-1-269556773	C	G	AC=14;AF=0.09;AN=156;BaseQRankSum=2.66;CSQ=G|upstream_gene_variant|MODIFIER||Zm00001d033646|Transcript|Zm00001d033646_T001|protein_coding|||||||||||709|-1|||,G|upstream_gene_variant|MODIFIER||Zm00001d033646|Transcript|Zm00001d033646_T002|protein_coding|||||||||||709|-1|||,G|upstream_gene_variant|MODIFIER||Zm00001d033646|Transcript|Zm00001d033646_T003|protein_coding|||||||||||709|-1|||,G|upstream_…	./.	0/0	0/0	0/0	0/0	0/0	0/0	0/0	0/0	0/0	0/1	1/1	0/0	0/0	0/0	0/0	0/0	0/0	0/0	0/0	0/0	0/0	1/1	0/0	0/0	0/0	0/0	0/0	0/0	1/1	0/0	0/1	1/1	./.	0/0	0/0	0/0	0/0	0/0	0/0	0/0	0/0	0/0	0/0
1	269556802	SNP-1-269556802	G	A	AC=14;AF=0.089;AN=158;BaseQRankSum=-0.674;CSQ=A|upstream_gene_variant|MODIFIER||Zm00001d033646|Transcript|Zm00001d033646_T001|protein_coding|||||||||||738|-1|||,A|upstream_gene_variant|MODIFIER||Zm00001d033646|Transcript|Zm00001d033646_T002|protein_coding|||||||||||738|-1|||,A|upstream_gene_variant|MODIFIER||Zm00001d033646|Transcript|Zm00001d033646_T003|protein_coding|||||||||||738|-1|||,A|upstre…	0/0	0/0	0/0	0/0	0/0	0/0	0/0	0/0	0/0	0/0	0/1	1/1	0/0	0/0	0/0	0/0	0/0	0/0	0/0	0/0	0/0	0/0	1/1	0/0	0/0	0/0	0/0	0/0	0/0	1/1	0/0	0/1	1/1	0/0	0/0	0/0	0/0	0/0	0/0	0/0	0/0	0/0	0/0	0/0
1	269556887	INS-1-269556887	G	GC	AC=12;AF=0.077;AN=156;CSQ=C|upstream_gene_variant|MODIFIER||Zm00001d033646|Transcript|Zm00001d033646_T001|protein_coding|||||||||||823|-1|||,C|upstream_gene_variant|MODIFIER||Zm00001d033646|Transcript|Zm00001d033646_T002|protein_coding|||||||||||823|-1|||,C|upstream_gene_variant|MODIFIER||Zm00001d033646|Transcript|Zm00001d033646_T003|protein_coding|||||||||||823|-1|||,C|upstream_gene_variant|MODI…	0/0	0/0	0/0	0/0	0/0	0/0	0/0	0/0	0/0	0/0	0/0	1/1	0/0	0/0	0/0	0/0	0/0	0/0	0/0	0/0	0/0	0/0	1/1	0/0	0/0	0/0	0/0	0/0	./.	1/1	0/0	0/0	1/1	0/0	0/0	0/0	0/0	0/0	0/0	0/0	0/0	0/0	./.	0/0
1	269557060	SNP-1-269557060	C	A	AC=12;AF=0.086;AN=140;CSQ=A|upstream_gene_variant|MODIFIER||Zm00001d033646|Transcript|Zm00001d033646_T001|protein_coding|||||||||||996|-1|||,A|upstream_gene_variant|MODIFIER||Zm00001d033646|Transcript|Zm00001d033646_T002|protein_coding|||||||||||996|-1|||,A|upstream_gene_variant|MODIFIER||Zm00001d033646|Transcript|Zm00001d033646_T003|protein_coding|||||||||||996|-1|||,A|upstream_gene_variant|MODI…	0/0	1/1	1/1	0/0	./.	0/0	0/0	0/0	1/1	0/0	0/0	./.	0/0	0/0	0/0	0/0	0/0	0/0	0/0	0/0	0/0	1/1	./.	0/0	0/0	0/0	0/0	0/0	0/0	./.	0/0	0/0	./.	./.	0/0	0/0	0/0	0/0	0/0	0/0	0/0	0/0	./.	0/0
1	269557410	SNP-1-269557410	A	G	AC=11;AF=0.071;AN=156;BaseQRankSum=0.842;CSQ=G|upstream_gene_variant|MODIFIER||Zm00001d033646|Transcript|Zm00001d033646_T001|protein_coding|||||||||||1346|-1|||,G|upstream_gene_variant|MODIFIER||Zm00001d033646|Transcript|Zm00001d033646_T002|protein_coding|||||||||||1346|-1|||,G|upstream_gene_variant|MODIFIER||Zm00001d033646|Transcript|Zm00001d033646_T003|protein_coding|||||||||||1346|-1|||,G|upst…	0/0	0/0	0/0	0/0	0/0	0/0	0/0	0/0	0/0	0/0	0/1	./.	0/0	0/0	0/0	0/0	0/0	0/0	0/0	0/0	0/0	0/0	1/1	0/0	0/0	0/0	0/0	0/0	0/0	1/1	0/0	0/0	1/1	0/0	0/0	0/0	0/0	0/0	0/0	0/0	0/0	0/0	0/0	0/0
1	269557416	SNP-1-269557416	T	A	AC=11;AF=0.071;AN=156;BaseQRankSum=-0.967;CSQ=A|upstream_gene_variant|MODIFIER||Zm00001d033646|Transcript|Zm00001d033646_T001|protein_coding|||||||||||1352|-1|||,A|upstream_gene_variant|MODIFIER||Zm00001d033646|Transcript|Zm00001d033646_T002|protein_coding|||||||||||1352|-1|||,A|upstream_gene_variant|MODIFIER||Zm00001d033646|Transcript|Zm00001d033646_T003|protein_coding|||||||||||1352|-1|||,A|ups…	0/0	0/0	0/0	0/0	0/0	0/0	0/0	0/0	0/0	0/0	0/1	./.	0/0	0/0	0/0	0/0	0/0	0/0	0/0	0/0	0/0	0/0	1/1	0/0	0/0	0/0	0/0	0/0	0/0	1/1	0/0	0/0	1/1	0/0	0/0	0/0	0/0	0/0	0/0	0/0	0/0	0/0	0/0	0/0
1	269557469	SNP-1-269557469	T	A	AC=15;AF=0.094;AN=160;BaseQRankSum=-0.967;CSQ=A|upstream_gene_variant|MODIFIER||Zm00001d033646|Transcript|Zm00001d033646_T001|protein_coding|||||||||||1405|-1|||,A|upstream_gene_variant|MODIFIER||Zm00001d033646|Transcript|Zm00001d033646_T002|protein_coding|||||||||||1405|-1|||,A|upstream_gene_variant|MODIFIER||Zm00001d033646|Transcript|Zm00001d033646_T003|protein_coding|||||||||||1405|-1|||,A|ups…	0/0	0/0	0/0	0/0	0/0	0/0	0/0	0/0	0/0	0/0	0/1	1/1	0/0	0/0	0/0	0/0	0/0	0/0	0/0	0/0	0/0	0/0	1/1	0/0	0/0	0/0	0/0	0/0	0/0	1/1	0/0	0/0	1/1	0/0	0/0	0/0	0/0	0/0	0/0	0/0	0/0	0/0	1/1	0/0
1	269557492	SNP-1-269557492	G	A	AC=13;AF=0.081;AN=160;BaseQRankSum=-0.431;CSQ=A|upstream_gene_variant|MODIFIER||Zm00001d033646|Transcript|Zm00001d033646_T001|protein_coding|||||||||||1428|-1|||,A|upstream_gene_variant|MODIFIER||Zm00001d033646|Transcript|Zm00001d033646_T002|protein_coding|||||||||||1428|-1|||,A|upstream_gene_variant|MODIFIER||Zm00001d033646|Transcript|Zm00001d033646_T003|protein_coding|||||||||||1428|-1|||,A|ups…	0/0	0/0	0/0	0/0	0/0	0/0	0/0	0/0	0/0	0/0	0/1	1/1	0/0	0/0	0/0	0/0	0/0	0/0	0/0	0/0	0/0	0/0	1/1	0/0	0/0	0/0	0/0	0/0	0/0	1/1	0/0	0/0	1/1	0/0	0/0	0/0	0/0	0/0	0/0	0/0	0/0	0/0	0/0	0/0
1	269557565	DEL-1-269557565	ATGCTAAT	A	AC=15;AF=0.095;AN=158;BaseQRankSum=1.38;CSQ=-|upstream_gene_variant|MODIFIER||Zm00001d033646|Transcript|Zm00001d033646_T001|protein_coding|||||||||||1502|-1|||,-|upstream_gene_variant|MODIFIER||Zm00001d033646|Transcript|Zm00001d033646_T002|protein_coding|||||||||||1502|-1|||,-|upstream_gene_variant|MODIFIER||Zm00001d033646|Transcript|Zm00001d033646_T003|protein_coding|||||||||||1502|-1|||,-|upstr…	0/0	0/0	0/0	0/0	0/0	0/0	0/0	0/0	0/0	0/0	0/0	1/1	0/0	0/0	0/0	0/0	0/0	0/0	0/0	0/0	0/0	0/0	1/1	0/0	0/0	0/0	0/0	0/0	0/0	1/1	0/0	0/1	1/1	0/0	0/0	./.	0/0	0/0	0/0	0/0	0/0	0/0	1/1	0/0
1	269557598	INS-1-269557598	A	AC	AC=14;AF=0.089;AN=158;BaseQRankSum=-0.967;CSQ=C|upstream_gene_variant|MODIFIER||Zm00001d033646|Transcript|Zm00001d033646_T001|protein_coding|||||||||||1534|-1|||,C|upstream_gene_variant|MODIFIER||Zm00001d033646|Transcript|Zm00001d033646_T002|protein_coding|||||||||||1534|-1|||,C|upstream_gene_variant|MODIFIER||Zm00001d033646|Transcript|Zm00001d033646_T003|protein_coding|||||||||||1534|-1|||,C|ups…	0/0	0/0	0/0	0/0	0/0	0/0	0/0	0/0	0/0	0/0	0/1	1/1	0/0	0/0	0/0	0/0	0/0	0/0	0/0	0/0	0/0	0/0	1/1	0/0	0/0	0/0	0/0	0/0	0/0	1/1	0/0	0/1	1/1	0/0	0/0	0/0	0/0	0/0	0/0	0/0	0/0	0/0	0/0	0/0
1	269557623	SNP-1-269557623	A	G	AC=15;AF=0.094;AN=160;BaseQRankSum=-0.18;CSQ=G|upstream_gene_variant|MODIFIER||Zm00001d033646|Transcript|Zm00001d033646_T001|protein_coding|||||||||||1559|-1|||,G|upstream_gene_variant|MODIFIER||Zm00001d033646|Transcript|Zm00001d033646_T002|protein_coding|||||||||||1559|-1|||,G|upstream_gene_variant|MODIFIER||Zm00001d033646|Transcript|Zm00001d033646_T003|protein_coding|||||||||||1559|-1|||,G|upst…	0/0	0/0	0/0	0/0	0/0	0/0	0/0	0/0	0/0	0/0	0/0	1/1	0/0	0/0	0/0	0/0	0/0	0/0	0/0	0/0	0/0	0/0	1/1	0/0	0/0	0/0	0/0	0/0	0/0	1/1	0/0	0/1	1/1	0/0	0/0	0/0	0/0	0/0	0/0	0/0	0/0	0/0	1/1	0/0
1	269557635	SNP-1-269557635	C	T	AC=14;AF=0.089;AN=158;BaseQRankSum=0;CSQ=T|upstream_gene_variant|MODIFIER||Zm00001d033646|Transcript|Zm00001d033646_T001|protein_coding|||||||||||1571|-1|||,T|upstream_gene_variant|MODIFIER||Zm00001d033646|Transcript|Zm00001d033646_T002|protein_coding|||||||||||1571|-1|||,T|upstream_gene_variant|MODIFIER||Zm00001d033646|Transcript|Zm00001d033646_T003|protein_coding|||||||||||1571|-1|||,T|upstream…	0/0	0/0	0/0	0/0	0/0	0/0	0/0	0/0	0/0	0/0	0/1	1/1	0/0	0/0	0/0	0/0	0/0	0/0	0/0	0/0	0/0	0/0	1/1	0/0	0/0	0/0	0/0	0/0	0/0	1/1	0/0	0/1	1/1	0/0	0/0	0/0	0/0	0/0	0/0	0/0	0/0	0/0	0/0	0/0
1	269557696	SNP-1-269557696	T	G	AC=25;AF=0.158;AN=158;BaseQRankSum=2.1;CSQ=G|upstream_gene_variant|MODIFIER||Zm00001d033646|Transcript|Zm00001d033646_T001|protein_coding|||||||||||1632|-1|||,G|upstream_gene_variant|MODIFIER||Zm00001d033646|Transcript|Zm00001d033646_T002|protein_coding|||||||||||1632|-1|||,G|upstream_gene_variant|MODIFIER||Zm00001d033646|Transcript|Zm00001d033646_T003|protein_coding|||||||||||1632|-1|||,G|upstre…	0/0	0/0	0/0	0/1	0/0	0/0	0/0	0/0	0/0	0/1	0/1	1/1	0/1	0/0	0/0	0/1	0/0	0/0	0/0	./.	0/0	0/0	1/1	0/0	0/1	0/0	0/0	0/0	0/0	1/1	0/0	0/0	1/1	0/1	0/0	0/0	0/0	0/1	0/0	0/0	0/0	0/0	0/1	0/0
1	269557714	SNP-1-269557714	A	G	AC=28;AF=0.175;AN=160;BaseQRankSum=0;CSQ=G|upstream_gene_variant|MODIFIER||Zm00001d033646|Transcript|Zm00001d033646_T001|protein_coding|||||||||||1650|-1|||,G|upstream_gene_variant|MODIFIER||Zm00001d033646|Transcript|Zm00001d033646_T002|protein_coding|||||||||||1650|-1|||,G|upstream_gene_variant|MODIFIER||Zm00001d033646|Transcript|Zm00001d033646_T003|protein_coding|||||||||||1650|-1|||,G|upstream…	0/0	0/0	0/0	0/1	0/0	0/0	0/0	0/0	0/0	0/1	0/1	1/1	0/1	0/0	0/0	0/1	0/0	0/0	0/0	0/0	0/0	0/0	1/1	0/0	0/1	0/0	0/0	0/0	0/0	1/1	0/0	0/1	1/1	0/1	0/0	0/0	0/0	0/1	0/0	0/0	0/0	0/0	0/1	0/0
1	269557728	SNP-1-269557728	T	C	AC=16;AF=0.103;AN=156;BaseQRankSum=0.18;CSQ=C|upstream_gene_variant|MODIFIER||Zm00001d033646|Transcript|Zm00001d033646_T001|protein_coding|||||||||||1664|-1|||,C|upstream_gene_variant|MODIFIER||Zm00001d033646|Transcript|Zm00001d033646_T002|protein_coding|||||||||||1664|-1|||,C|upstream_gene_variant|MODIFIER||Zm00001d033646|Transcript|Zm00001d033646_T003|protein_coding|||||||||||1664|-1|||,C|upstr…	0/0	0/0	0/0	0/1	0/0	0/0	0/0	0/0	0/0	0/1	0/1	./.	0/1	0/0	0/0	0/1	0/0	0/0	0/0	0/0	0/0	0/0	0/1	./.	0/0	0/0	0/0	0/0	0/0	1/1	0/0	0/0	1/1	0/0	0/0	0/0	0/0	0/1	0/0	0/0	0/0	0/0	0/0	0/0
1	269557745	SNP-1-269557745	A	G	AC=25;AF=0.158;AN=158;BaseQRankSum=0.319;CSQ=G|upstream_gene_variant|MODIFIER||Zm00001d033646|Transcript|Zm00001d033646_T001|protein_coding|||||||||||1681|-1|||,G|upstream_gene_variant|MODIFIER||Zm00001d033646|Transcript|Zm00001d033646_T002|protein_coding|||||||||||1681|-1|||,G|upstream_gene_variant|MODIFIER||Zm00001d033646|Transcript|Zm00001d033646_T003|protein_coding|||||||||||1681|-1|||,G|upst…	0/0	0/0	0/0	0/1	0/0	0/0	0/0	0/0	0/0	0/1	0/1	./.	0/1	0/0	0/0	0/1	0/0	0/0	0/0	0/0	0/0	0/0	1/1	0/0	0/1	0/0	0/0	0/0	0/0	1/1	0/0	0/1	1/1	0/1	0/0	0/0	0/0	0/1	0/0	0/0	0/0	0/0	0/1	0/0
1	269557843	SNP-1-269557843	A	G	AC=21;AF=0.133;AN=158;BaseQRankSum=1.24;CSQ=G|upstream_gene_variant|MODIFIER||Zm00001d033646|Transcript|Zm00001d033646_T001|protein_coding|||||||||||1779|-1|||,G|upstream_gene_variant|MODIFIER||Zm00001d033646|Transcript|Zm00001d033646_T002|protein_coding|||||||||||1779|-1|||,G|upstream_gene_variant|MODIFIER||Zm00001d033646|Transcript|Zm00001d033646_T003|protein_coding|||||||||||1779|-1|||,G|upstr…	0/0	0/0	0/0	0/1	0/0	0/0	0/0	0/0	0/0	0/0	0/1	./.	0/0	0/0	0/0	0/0	0/0	0/0	0/0	0/0	0/0	0/0	1/1	0/0	0/0	0/0	0/0	0/0	0/0	1/1	0/0	0/1	1/1	0/0	0/0	0/0	0/0	0/0	0/0	0/0	0/0	0/0	0/0	0/0
1	269557979	SNP-1-269557979	C	G	AC=12;AF=0.075;AN=160;BaseQRankSum=-0.689;CSQ=G|upstream_gene_variant|MODIFIER||Zm00001d033646|Transcript|Zm00001d033646_T001|protein_coding|||||||||||1915|-1|||,G|upstream_gene_variant|MODIFIER||Zm00001d033646|Transcript|Zm00001d033646_T002|protein_coding|||||||||||1915|-1|||,G|upstream_gene_variant|MODIFIER||Zm00001d033646|Transcript|Zm00001d033646_T003|protein_coding|||||||||||1915|-1|||,G|ups…	0/0	0/0	0/0	0/0	0/0	0/0	0/0	0/0	0/0	0/1	0/1	1/1	0/0	0/0	0/0	0/0	0/0	0/0	0/0	0/0	0/0	0/0	0/1	0/0	0/0	0/0	0/0	0/0	0/0	1/1	0/0	0/0	1/1	0/0	0/0	0/0	0/0	0/0	0/0	0/0	0/0	0/0	0/0	0/0
1	269558035	SNP-1-269558035	G	A	AC=12;AF=0.078;AN=154;BaseQRankSum=-0.842;CSQ=A|upstream_gene_variant|MODIFIER||Zm00001d033646|Transcript|Zm00001d033646_T001|protein_coding|||||||||||1971|-1|||,A|upstream_gene_variant|MODIFIER||Zm00001d033646|Transcript|Zm00001d033646_T002|protein_coding|||||||||||1971|-1|||,A|upstream_gene_variant|MODIFIER||Zm00001d033646|Transcript|Zm00001d033646_T003|protein_coding|||||||||||1971|-1|||,A|ups…	0/0	0/0	0/0	0/0	0/0	0/0	0/0	0/0	0/0	0/1	0/1	1/1	0/0	0/0	0/0	0/0	0/0	0/0	0/0	0/0	0/0	0/0	./.	0/0	0/0	./.	0/0	0/0	0/0	1/1	0/0	0/0	1/1	0/0	0/0	0/0	0/0	0/0	0/0	0/0	0/0	0/0	0/0	0/0
1	300082146	SNP-1-300082146	G	A	AC=17;AF=0.109;AN=156;BaseQRankSum=-1.682;CSQ=A|upstream_gene_variant|MODIFIER||Zm00001d034690|Transcript|Zm00001d034690_T001|protein_coding|||||||||||1241|1|||;DP=889;ExcessHet=1.0283;FS=3.001;InbreedingCoeff=0.0151;MLEAC=18;MLEAF=0.115;MQ=60;MQRankSum=0;QD=4.86;ReadPosRankSum=0;SOR=0.804	0/0	0/0	0/0	0/1	0/0	0/0	0/0	0/0	0/1	0/0	0/1	0/1	0/0	0/0	0/0	0/0	0/0	0/0	0/1	0/0	0/0	0/1	0/0	0/0	0/0	0/0	0/0	0/0	0/0	0/0	0/1	0/1	0/0	0/1	0/0	0/0	0/1	0/0	0/0	0/0	0/0	0/0	0/0	0/0
1	300082525	SNP-1-300082525	C	A	AC=16;AF=0.103;AN=156;BaseQRankSum=-3.068;CSQ=A|upstream_gene_variant|MODIFIER||Zm00001d034690|Transcript|Zm00001d034690_T001|protein_coding|||||||||||862|1|||;DP=866;ExcessHet=0.8111;FS=0;InbreedingCoeff=0.0236;MLEAC=17;MLEAF=0.109;MQ=60;MQRankSum=0;QD=6.82;ReadPosRankSum=-0.283;SOR=0.668	0/0	0/0	0/0	0/1	0/0	0/0	0/0	0/0	0/1	0/0	0/1	0/1	0/0	0/0	0/0	0/0	0/0	0/0	0/1	0/0	0/0	0/1	0/0	0/0	0/0	0/0	0/0	0/0	0/0	0/0	0/1	0/1	0/1	0/0	0/0	0/0	0/0	0/0	0/0	0/0	0/0	0/0	0/0	0/0
1	300082700	SNP-1-300082700	A	G	AC=10;AF=0.064;AN=156;BaseQRankSum=-0.18;CSQ=G|upstream_gene_variant|MODIFIER||Zm00001d034690|Transcript|Zm00001d034690_T001|protein_coding|||||||||||687|1|||;DP=876;ExcessHet=1.3534;FS=2.125;InbreedingCoeff=0.0388;MLEAC=9;MLEAF=0.058;MQ=60;MQRankSum=0;QD=2.85;ReadPosRankSum=0.624;SOR=0.506	0/0	0/0	0/0	0/0	0/0	0/0	0/0	0/0	0/0	0/0	0/1	0/1	0/0	0/0	0/0	0/0	0/0	0/0	0/0	0/0	0/0	0/0	0/0	0/0	0/0	0/0	0/1	0/0	0/0	0/0	0/0	0/0	0/1	0/1	0/0	0/0	0/1	0/0	0/0	0/0	0/0	0/0	0/0	0/0
2	16706824	SNP-2-16706824	C	G	AC=37;AF=0.24;AN=154;BaseQRankSum=-0.967;CSQ=G|upstream_gene_variant|MODIFIER||Zm00001d002610|Transcript|Zm00001d002610_T001|protein_coding|||||||||||1744|1|||;DP=345;ExcessHet=0;FS=0;InbreedingCoeff=0.6418;MLEAC=29;MLEAF=0.188;MQ=57.21;MQRankSum=0;QD=34.41;ReadPosRankSum=0;SOR=1.697	./.	1/1	1/1	1/1	0/0	0/0	0/0	0/0	1/1	0/0	0/0	0/0	0/0	0/0	0/0	0/0	0/0	0/0	0/0	0/0	0/0	1/1	1/1	0/0	0/0	0/0	0/0	0/1	1/1	0/0	0/0	0/0	1/1	0/0	0/0	0/0	0/0	1/1	0/0	0/0	0/0	./.	0/0	0/0
2	16706955	SNP-2-16706955	A	G	AC=53;AF=0.335;AN=158;BaseQRankSum=-0.842;CSQ=G|upstream_gene_variant|MODIFIER||Zm00001d002610|Transcript|Zm00001d002610_T001|protein_coding|||||||||||1613|1|||;DP=361;ExcessHet=0;FS=0;InbreedingCoeff=0.7247;MLEAC=48;MLEAF=0.304;MQ=58.2;MQRankSum=0;QD=31.09;ReadPosRankSum=0.524;SOR=0.9	1/1	1/1	1/1	1/1	1/1	0/0	0/0	0/0	1/1	0/0	0/1	0/0	0/0	0/0	0/0	1/1	0/0	0/0	0/0	0/0	0/0	1/1	1/1	0/0	0/0	0/0	0/0	0/0	1/1	0/0	0/0	0/0	1/1	0/0	0/0	0/0	0/0	1/1	0/0	0/0	0/0	1/1	0/0	0/0
2	16706966	SNP-2-16706966	T	C	AC=10;AF=0.063;AN=158;CSQ=C|upstream_gene_variant|MODIFIER||Zm00001d002610|Transcript|Zm00001d002610_T001|protein_coding|||||||||||1602|1|||;DP=330;ExcessHet=0;FS=0;InbreedingCoeff=0.4857;MLEAC=9;MLEAF=0.057;MQ=52.79;QD=21.81;SOR=0.826	0/0	0/0	0/0	0/0	1/1	0/0	0/0	0/0	0/0	0/0	0/0	0/0	0/0	0/0	0/0	1/1	0/0	0/0	0/0	0/0	0/0	0/0	0/0	0/0	0/0	0/0	./.	0/0	0/0	0/0	0/0	0/0	0/0	0/0	0/0	0/0	0/0	0/0	0/0	0/0	0/0	0/0	0/0	0/0
2	16706997	SNP-2-16706997	C	G	AC=10;AF=0.063;AN=160;CSQ=G|upstream_gene_variant|MODIFIER||Zm00001d002610|Transcript|Zm00001d002610_T001|protein_coding|||||||||||1571|1|||;DP=349;ExcessHet=0;FS=0;InbreedingCoeff=0.4531;MLEAC=9;MLEAF=0.056;MQ=57.77;QD=32.89;SOR=0.997	0/0	0/0	0/0	0/0	1/1	0/0	0/0	0/0	0/0	0/0	0/0	0/0	0/0	0/0	0/0	1/1	0/0	0/0	0/0	0/0	0/0	0/0	0/0	0/0	0/0	0/0	0/0	0/0	0/0	0/0	0/0	0/0	0/0	0/0	0/0	0/0	0/0	0/0	0/0	0/0	0/0	0/0	0/0	0/0
2	16707011	SNP-2-16707011	G	A	AC=10;AF=0.066;AN=152;CSQ=A|upstream_gene_variant|MODIFIER||Zm00001d002610|Transcript|Zm00001d002610_T001|protein_coding|||||||||||1557|1|||;DP=343;ExcessHet=0;FS=0;InbreedingCoeff=0.472;MLEAC=9;MLEAF=0.059;MQ=58.7;QD=31.73;SOR=0.941	0/0	0/0	0/0	0/0	1/1	0/0	0/0	0/0	0/0	0/0	0/0	0/0	0/0	0/0	0/0	1/1	0/0	0/0	0/0	0/0	0/0	0/0	0/0	0/0	0/0	./.	0/0	0/0	0/0	0/0	0/0	0/0	0/0	0/0	0/0	0/0	0/0	0/0	0/0	0/0	0/0	./.	0/0	0/0
2	16707036	INS-2-16707036	C	CGCTCACGAGTTTAGAA	AC=41;AF=0.27;AN=152;BaseQRankSum=0.431;CSQ=GCTCACGAGTTTAGAA|upstream_gene_variant|MODIFIER||Zm00001d002610|Transcript|Zm00001d002610_T001|protein_coding|||||||||||1531|1|||;DP=380;ExcessHet=0;FS=9.405;InbreedingCoeff=0.6916;MLEAC=37;MLEAF=0.243;MQ=59.97;MQRankSum=0;QD=26.29;ReadPosRankSum=-1.15;SOR=1.084	1/1	1/1	1/1	1/1	0/0	0/0	0/0	0/0	./.	0/0	0/1	0/0	0/0	0/0	0/0	0/0	0/0	0/0	0/0	0/0	0/0	1/1	1/1	0/0	0/0	./.	0/0	0/1	1/1	0/0	0/0	0/0	1/1	0/1	0/0	0/0	0/0	1/1	0/0	0/0	0/0	1/1	./.	0/0
2	16707057	SNP-2-16707057	T	C	AC=10;AF=0.067;AN=150;CSQ=C|upstream_gene_variant|MODIFIER||Zm00001d002610|Transcript|Zm00001d002610_T001|protein_coding|||||||||||1511|1|||;DP=372;ExcessHet=0;FS=0;InbreedingCoeff=0.5914;MLEAC=9;MLEAF=0.06;MQ=59.44;QD=21.35;SOR=0.693	0/0	0/0	0/0	0/0	1/1	0/0	0/0	0/0	./.	0/0	0/0	0/0	0/0	0/0	0/0	1/1	0/0	0/0	0/0	0/0	0/0	0/0	0/0	0/0	0/0	./.	0/0	0/0	0/0	0/0	0/0	./.	0/0	0/0	0/0	0/0	0/0	0/0	./.	0/0	0/0	0/0	0/0	0/0
2	16707165	INS-2-16707165	A	ATGTCTAG	AC=8;AF=0.052;AN=154;CSQ=TGTCTAG|upstream_gene_variant|MODIFIER||Zm00001d002610|Transcript|Zm00001d002610_T001|protein_coding|||||||||||1402|1|||;DP=345;ExcessHet=0;FS=0;InbreedingCoeff=0.4327;MLEAC=5;MLEAF=0.032;MQ=43.6;QD=31.68;SOR=2.494	0/0	0/0	0/0	0/0	1/1	0/0	0/0	0/0	0/0	0/0	0/0	0/0	0/0	0/0	0/0	1/1	0/0	0/0	0/0	0/0	0/0	0/0	0/0	0/0	0/0	0/0	0/0	0/0	0/0	0/0	0/0	0/0	0/0	0/0	0/0	0/0	0/0	0/0	0/0	0/0	0/0	0/0	0/0	0/0
2	16707184	DEL-2-16707184	AATCCTGTTCGG	A	AC=41;AF=0.285;AN=144;BaseQRankSum=0;CSQ=-|upstream_gene_variant|MODIFIER||Zm00001d002610|Transcript|Zm00001d002610_T001|protein_coding|||||||||||1373|1|||;DP=351;ExcessHet=0;FS=4.027;InbreedingCoeff=0.6702;MLEAC=42;MLEAF=0.292;MQ=60;MQRankSum=0;QD=29.92;ReadPosRankSum=0;SOR=0.265	1/1	1/1	1/1	./.	./.	0/0	0/0	0/0	1/1	0/0	0/1	0/0	0/0	0/0	0/0	0/0	0/0	0/0	0/0	0/0	0/0	1/1	1/1	0/0	./.	0/0	0/0	0/1	1/1	0/0	0/0	0/0	1/1	0/1	0/0	0/0	0/0	1/1	0/0	0/0	0/0	./.	0/0	0/0
2	16707213	SNP-2-16707213	T	A	AC=43;AF=0.283;AN=152;BaseQRankSum=1.15;CSQ=A|upstream_gene_variant|MODIFIER||Zm00001d002610|Transcript|Zm00001d002610_T001|protein_coding|||||||||||1355|1|||;DP=334;ExcessHet=0;FS=9.214;InbreedingCoeff=0.6676;MLEAC=42;MLEAF=0.276;MQ=60;MQRankSum=0;QD=23.73;ReadPosRankSum=-0.319;SOR=0.057	1/1	1/1	1/1	./.	0/0	0/0	0/0	0/0	1/1	0/0	0/1	0/0	0/0	0/0	0/0	0/0	0/0	0/0	0/0	0/0	0/0	1/1	1/1	0/0	0/0	0/0	0/0	0/1	1/1	0/0	0/0	0/0	1/1	0/1	0/0	0/0	0/0	1/1	0/0	0/0	0/0	1/1	0/0	0/0
2	16707335	SNP-2-16707335	C	T	AC=45;AF=0.313;AN=144;BaseQRankSum=-1.383;CSQ=T|upstream_gene_variant|MODIFIER||Zm00001d002610|Transcript|Zm00001d002610_T001|protein_coding|||||||||||1233|1|||;DP=361;ExcessHet=0;FS=0;InbreedingCoeff=0.69;MLEAC=47;MLEAF=0.326;MQ=60;MQRankSum=0;QD=32.89;ReadPosRankSum=-0.21;SOR=0.51	1/1	1/1	1/1	1/1	./.	0/0	0/0	0/0	1/1	0/0	0/1	0/0	0/0	0/0	0/0	./.	0/0	0/0	0/0	0/0	0/0	1/1	1/1	0/0	0/0	0/0	0/0	0/1	1/1	0/0	0/0	0/0	1/1	0/1	0/0	0/0	0/0	1/1	./.	0/0	0/0	1/1	0/0	0/0
2	16707341	SNP-2-16707341	T	A	AC=45;AF=0.313;AN=144;BaseQRankSum=-1.465;CSQ=A|upstream_gene_variant|MODIFIER||Zm00001d002610|Transcript|Zm00001d002610_T001|protein_coding|||||||||||1227|1|||;DP=363;ExcessHet=0;FS=0;InbreedingCoeff=0.6986;MLEAC=47;MLEAF=0.326;MQ=60;MQRankSum=0;QD=35.28;ReadPosRankSum=-0.674;SOR=0.51	1/1	1/1	1/1	1/1	./.	0/0	0/0	0/0	1/1	0/0	0/1	0/0	0/0	0/0	0/0	./.	0/0	0/0	0/0	0/0	0/0	1/1	1/1	0/0	0/0	0/0	0/0	0/1	1/1	0/0	0/0	0/0	1/1	0/1	0/0	0/0	0/0	1/1	./.	0/0	0/0	1/1	0/0	0/0
2	16707365	SNP-2-16707365	A	C	AC=46;AF=0.315;AN=146;BaseQRankSum=0.084;CSQ=C|upstream_gene_variant|MODIFIER||Zm00001d002610|Transcript|Zm00001d002610_T001|protein_coding|||||||||||1203|1|||;DP=369;ExcessHet=0;FS=2.068;InbreedingCoeff=0.7265;MLEAC=48;MLEAF=0.329;MQ=60;MQRankSum=0;QD=31.74;ReadPosRankSum=-1.282;SOR=0.23	1/1	1/1	1/1	1/1	./.	0/0	0/0	0/0	1/1	0/0	0/1	0/0	0/0	0/0	0/0	./.	0/0	0/0	0/0	0/0	0/0	1/1	1/1	0/0	0/0	0/0	0/0	1/1	1/1	0/0	0/0	0/0	1/1	0/1	0/0	0/0	0/0	1/1	0/0	0/0	0/0	1/1	0/0	0/0
2	16707374	SNP-2-16707374	G	A	AC=46;AF=0.319;AN=144;BaseQRankSum=-0.431;CSQ=A|upstream_gene_variant|MODIFIER||Zm00001d002610|Transcript|Zm00001d002610_T001|protein_coding|||||||||||1194|1|||;DP=367;ExcessHet=0;FS=2.068;InbreedingCoeff=0.7229;MLEAC=49;MLEAF=0.34;MQ=60;MQRankSum=0;QD=32.26;ReadPosRankSum=-1.161;SOR=0.244	1/1	1/1	1/1	1/1	./.	0/0	0/0	0/0	1/1	0/0	0/1	0/0	0/0	0/0	0/0	./.	0/0	0/0	0/0	0/0	0/0	1/1	1/1	0/0	0/0	0/0	0/0	1/1	1/1	0/0	0/0	./.	1/1	0/1	0/0	0/0	0/0	1/1	0/0	0/0	0/0	1/1	0/0	0/0
2	16707419	SNP-2-16707419	T	G	AC=47;AF=0.318;AN=148;BaseQRankSum=0.253;CSQ=G|upstream_gene_variant|MODIFIER||Zm00001d002610|Transcript|Zm00001d002610_T001|protein_coding|||||||||||1149|1|||;DP=357;ExcessHet=0;FS=0;InbreedingCoeff=0.6867;MLEAC=50;MLEAF=0.338;MQ=60;MQRankSum=0;QD=28.78;ReadPosRankSum=0.66;SOR=0.719	1/1	1/1	1/1	1/1	./.	0/0	0/0	0/0	1/1	0/1	0/1	0/0	0/0	0/0	0/0	0/0	0/0	0/0	0/0	0/0	0/0	1/1	1/1	0/0	0/0	0/0	0/0	1/1	1/1	0/0	0/0	./.	1/1	0/1	0/0	0/0	0/0	1/1	0/0	0/0	0/0	1/1	0/0	0/0
2	16707423	SNP-2-16707423	T	C	AC=46;AF=0.315;AN=146;BaseQRankSum=0.557;CSQ=C|upstream_gene_variant|MODIFIER||Zm00001d002610|Transcript|Zm00001d002610_T001|protein_coding|||||||||||1145|1|||;DP=357;ExcessHet=0;FS=0;InbreedingCoeff=0.6688;MLEAC=48;MLEAF=0.329;MQ=60;MQRankSum=0;QD=26.11;ReadPosRankSum=1.04;SOR=0.682	1/1	1/1	1/1	1/1	./.	0/0	0/0	0/0	1/1	0/1	0/1	0/0	0/0	0/0	0/0	0/0	0/0	0/0	0/0	0/0	0/0	1/1	1/1	0/0	0/0	0/0	0/0	0/1	1/1	0/0	0/0	./.	1/1	0/1	0/0	0/0	0/0	1/1	0/0	0/0	0/0	1/1	0/0	0/0
2	16707435	SNP-2-16707435	T	C	AC=46;AF=0.324;AN=142;BaseQRankSum=1.65;CSQ=C|upstream_gene_variant|MODIFIER||Zm00001d002610|Transcript|Zm00001d002610_T001|protein_coding|||||||||||1133|1|||;DP=358;ExcessHet=0;FS=1.139;InbreedingCoeff=0.6749;MLEAC=49;MLEAF=0.345;MQ=60;MQRankSum=0;QD=36.12;ReadPosRankSum=0.967;SOR=0.569	1/1	1/1	1/1	1/1	./.	0/0	0/0	0/0	1/1	0/1	0/1	0/0	0/0	0/0	0/0	./.	0/0	0/0	0/0	0/0	0/0	1/1	1/1	0/0	0/0	0/0	0/0	0/1	1/1	0/0	0/0	./.	1/1	0/1	0/0	0/0	0/0	1/1	0/0	0/0	0/0	1/1	0/0	0/0
2	16707460	SNP-2-16707460	C	T	AC=77;AF=0.52;AN=148;BaseQRankSum=0;CSQ=T|upstream_gene_variant|MODIFIER||Zm00001d002610|Transcript|Zm00001d002610_T001|protein_coding|||||||||||1108|1|||;DP=366;ExcessHet=0;FS=0;InbreedingCoeff=0.7295;MLEAC=86;MLEAF=0.581;MQ=60;MQRankSum=0;QD=25.65;ReadPosRankSum=0;SOR=0.627	0/0	0/0	0/0	0/0	0/0	1/1	1/1	0/1	0/0	0/1	0/0	1/1	0/0	./.	1/1	0/0	1/1	1/1	1/1	1/1	1/1	./.	0/0	1/1	1/1	./.	1/1	0/1	0/0	1/1	1/1	0/0	0/0	0/0	1/1	1/1	1/1	0/0	1/1	1/1	1/1	0/0	1/1	1/1
2	16707493	SNP-2-16707493	C	A	AC=50;AF=0.329;AN=152;BaseQRankSum=-1.18;CSQ=A|upstream_gene_variant|MODIFIER||Zm00001d002610|Transcript|Zm00001d002610_T001|protein_coding|||||||||||1075|1|||;DP=369;ExcessHet=0;FS=13.107;InbreedingCoeff=0.6967;MLEAC=52;MLEAF=0.342;MQ=60;MQRankSum=0;QD=30.94;ReadPosRankSum=0.712;SOR=0.039	1/1	1/1	1/1	1/1	./.	0/0	0/0	0/0	1/1	0/0	1/1	0/0	0/0	0/0	0/0	./.	0/0	0/0	0/0	0/0	0/0	1/1	1/1	0/0	0/0	0/0	0/0	0/1	1/1	0/0	0/0	0/0	1/1	0/1	0/0	0/0	0/0	1/1	0/0	0/0	0/0	1/1	0/0	0/0
2	16707556	DEL-2-16707556	AAGT	A	AC=43;AF=0.276;AN=156;BaseQRankSum=-0.842;CSQ=-|upstream_gene_variant|MODIFIER||Zm00001d002610|Transcript|Zm00001d002610_T001|protein_coding|||||||||||1009|1|||;DP=348;ExcessHet=0;FS=10.394;InbreedingCoeff=0.6975;MLEAC=42;MLEAF=0.269;MQ=60;MQRankSum=0;QD=27.75;ReadPosRankSum=-0.524;SOR=0.47	1/1	1/1	1/1	1/1	0/0	0/0	0/0	0/0	1/1	0/0	0/1	0/0	0/0	0/0	0/0	0/0	0/0	0/0	0/0	0/0	0/0	1/1	1/1	0/0	0/0	0/0	0/0	0/1	1/1	0/0	0/0	0/0	1/1	0/1	0/0	0/0	0/0	1/1	0/0	0/0	0/0	./.	0/0	0/0
2	16707670	SNP-2-16707670	C	T	AC=45;AF=0.304;AN=148;BaseQRankSum=-0.524;CSQ=T|upstream_gene_variant|MODIFIER||Zm00001d002610|Transcript|Zm00001d002610_T001|protein_coding|||||||||||898|1|||;DP=323;ExcessHet=0;FS=0;InbreedingCoeff=0.6556;MLEAC=47;MLEAF=0.318;MQ=60;MQRankSum=0;QD=27.49;ReadPosRankSum=-0.524;SOR=0.772	1/1	1/1	1/1	1/1	./.	0/0	0/0	0/0	1/1	0/0	0/1	0/0	0/0	0/0	0/0	0/0	0/0	0/0	0/0	0/0	0/0	1/1	1/1	0/0	0/0	0/0	0/0	1/1	1/1	0/0	0/0	0/1	1/1	0/1	0/0	0/0	0/0	1/1	0/0	0/0	0/0	1/1	0/0	0/0
2	16707672	SNP-2-16707672	G	A	AC=45;AF=0.308;AN=146;BaseQRankSum=-1.645;CSQ=A|upstream_gene_variant|MODIFIER||Zm00001d002610|Transcript|Zm00001d002610_T001|protein_coding|||||||||||896|1|||;DP=322;ExcessHet=0;FS=0;InbreedingCoeff=0.6545;MLEAC=48;MLEAF=0.329;MQ=60;MQRankSum=0;QD=30.25;ReadPosRankSum=-0.524;SOR=0.772	1/1	1/1	1/1	1/1	./.	0/0	0/0	0/0	1/1	0/0	0/1	0/0	0/0	0/0	0/0	./.	0/0	0/0	0/0	0/0	0/0	1/1	1/1	0/0	0/0	0/0	0/0	1/1	1/1	0/0	0/0	0/1	1/1	0/1	0/0	0/0	0/0	1/1	0/0	0/0	0/0	1/1	0/0	0/0
2	16707690	SNP-2-16707690	T	G	AC=47;AF=0.318;AN=148;BaseQRankSum=0;CSQ=G|upstream_gene_variant|MODIFIER||Zm00001d002610|Transcript|Zm00001d002610_T001|protein_coding|||||||||||878|1|||;DP=329;ExcessHet=0;FS=0;InbreedingCoeff=0.6764;MLEAC=48;MLEAF=0.324;MQ=60;MQRankSum=0;QD=24.51;ReadPosRankSum=0;SOR=0.931	1/1	1/1	1/1	1/1	./.	0/0	0/0	0/0	1/1	0/0	0/1	0/0	0/0	0/0	0/0	./.	0/0	0/0	0/0	0/0	0/0	1/1	1/1	0/0	0/0	0/0	0/0	1/1	1/1	0/0	0/0	0/1	1/1	0/1	0/0	0/0	0/0	1/1	0/0	0/0	0/0	1/1	0/0	0/0
2	16707701	SNP-2-16707701	A	G	AC=41;AF=0.273;AN=150;BaseQRankSum=-0.253;CSQ=G|upstream_gene_variant|MODIFIER||Zm00001d002610|Transcript|Zm00001d002610_T001|protein_coding|||||||||||867|1|||;DP=336;ExcessHet=0;FS=0;InbreedingCoeff=0.6535;MLEAC=40;MLEAF=0.267;MQ=60;MQRankSum=0;QD=23.14;ReadPosRankSum=0.524;SOR=0.776	1/1	1/1	1/1	1/1	./.	0/0	0/0	0/0	1/1	0/0	0/1	0/0	0/0	0/0	0/0	./.	0/0	0/0	0/0	0/0	0/0	1/1	1/1	0/0	0/0	0/0	0/0	1/1	1/1	0/0	0/0	0/1	1/1	0/1	0/0	0/0	0/0	1/1	0/0	0/0	0/0	0/0	0/0	0/0
2	16707796	INS-2-16707796	T	TA	AC=26;AF=0.171;AN=152;BaseQRankSum=0;CSQ=A|upstream_gene_variant|MODIFIER||Zm00001d002610|Transcript|Zm00001d002610_T001|protein_coding|||||||||||771|1|||;DP=355;ExcessHet=0;FS=0;InbreedingCoeff=0.6216;MLEAC=22;MLEAF=0.145;MQ=60;MQRankSum=0;QD=34.15;ReadPosRankSum=1.28;SOR=0.61	0/0	./.	1/1	1/1	0/0	0/0	0/0	0/0	1/1	0/0	0/1	0/0	0/0	0/0	0/0	0/0	0/0	0/0	0/0	0/0	0/0	1/1	0/0	0/0	0/0	0/0	0/0	0/1	0/0	0/0	0/0	0/0	0/0	0/0	0/0	0/0	0/0	1/1	0/0	0/0	0/0	0/0	0/0	0/0
2	16707907	INS-2-16707907	G	GACTTATTGGCTCGAAC	AC=36;AF=0.261;AN=138;CSQ=ACTTATTGGCTCGAAC|upstream_gene_variant|MODIFIER||Zm00001d002610|Transcript|Zm00001d002610_T001|protein_coding|||||||||||660|1|||;DP=336;ExcessHet=0;FS=0;InbreedingCoeff=0.6901;MLEAC=36;MLEAF=0.261;MQ=59.8;QD=31.79;SOR=0.693	1/1	1/1	1/1	1/1	0/0	0/0	0/0	0/0	1/1	0/0	0/0	0/0	0/0	0/0	0/0	0/0	0/0	0/0	./.	0/0	0/0	1/1	./.	0/0	0/0	0/0	0/0	./.	1/1	0/0	0/0	./.	./.	0/0	0/0	0/0	0/0	1/1	0/0	0/0	0/0	1/1	0/0	0/0
2	16707935	SNP-2-16707935	A	G	AC=34;AF=0.246;AN=138;CSQ=G|upstream_gene_variant|MODIFIER||Zm00001d002610|Transcript|Zm00001d002610_T001|protein_coding|||||||||||633|1|||;DP=346;ExcessHet=0;FS=0;InbreedingCoeff=0.6421;MLEAC=34;MLEAF=0.246;MQ=59.8;QD=30.04;SOR=1.85	1/1	1/1	1/1	1/1	0/0	0/0	0/0	0/0	1/1	0/0	0/0	0/0	0/0	0/0	0/0	0/0	0/0	0/0	0/0	0/0	0/0	1/1	./.	0/0	0/0	0/0	0/0	./.	1/1	0/0	0/0	./.	./.	./.	0/0	0/0	0/0	1/1	0/0	0/0	0/0	1/1	0/0	0/0
2	16707969	SNP-2-16707969	G	C	AC=42;AF=0.284;AN=148;CSQ=C|upstream_gene_variant|MODIFIER||Zm00001d002610|Transcript|Zm00001d002610_T001|protein_coding|||||||||||599|1|||;DP=341;ExcessHet=0;FS=18.716;InbreedingCoeff=0.6715;MLEAC=39;MLEAF=0.264;MQ=57.78;QD=31.98;SOR=1.173	1/1	1/1	1/1	1/1	1/1	0/0	0/0	0/0	1/1	0/0	0/0	0/0	0/0	0/0	0/0	1/1	0/0	0/0	0/0	0/0	0/0	1/1	./.	0/0	0/0	0/0	0/0	0/0	1/1	0/0	0/0	0/0	./.	0/0	0/0	0/0	0/0	1/1	0/0	0/0	0/0	1/1	0/0	0/0
2	16708384	DEL-2-16708384	TG	T	AC=29;AF=0.201;AN=144;BaseQRankSum=0.674;CSQ=-|upstream_gene_variant|MODIFIER||Zm00001d002610|Transcript|Zm00001d002610_T001|protein_coding|||||||||||183|1|||;DP=306;ExcessHet=0;FS=10.132;InbreedingCoeff=0.589;MLEAC=23;MLEAF=0.16;MQ=60;MQRankSum=0;QD=32.32;ReadPosRankSum=1.15;SOR=3.036	./.	1/1	1/1	1/1	0/0	0/0	0/0	0/0	1/1	0/1	0/0	0/0	0/0	0/0	0/0	0/0	0/0	0/0	0/0	0/0	0/0	1/1	./.	0/0	0/0	0/0	0/0	0/0	1/1	0/0	0/0	0/0	1/1	0/0	0/0	0/0	0/0	./.	0/0	0/0	0/0	./.	0/0	0/0
2	16708399	SNP-2-16708399	C	G	AC=79;AF=0.572;AN=138;BaseQRankSum=-1.282;CSQ=G|upstream_gene_variant|MODIFIER||Zm00001d002610|Transcript|Zm00001d002610_T001|protein_coding|||||||||||169|1|||;DP=292;ExcessHet=0;FS=0;InbreedingCoeff=0.612;MLEAC=98;MLEAF=0.71;MQ=59.89;MQRankSum=0;QD=25.23;ReadPosRankSum=0.319;SOR=0.693	0/0	0/0	0/0	0/0	./.	1/1	1/1	0/1	0/0	0/0	1/1	1/1	0/0	0/1	1/1	./.	1/1	1/1	1/1	1/1	1/1	0/0	./.	1/1	1/1	1/1	./.	0/1	0/0	1/1	1/1	1/1	0/0	0/0	1/1	1/1	1/1	./.	1/1	./.	1/1	0/0	1/1	1/1
2	16708433	INS-2-16708433	C	CGGCCAGAAAAT	AC=75;AF=0.528;AN=142;BaseQRankSum=0.566;CSQ=GGCCAGAAAAT|upstream_gene_variant|MODIFIER||Zm00001d002610|Transcript|Zm00001d002610_T001|protein_coding|||||||||||134|1|||;DP=316;ExcessHet=0;FS=0;InbreedingCoeff=0.6603;MLEAC=90;MLEAF=0.634;MQ=59.86;MQRankSum=0;QD=29.96;ReadPosRankSum=-0.524;SOR=0.795	0/0	0/0	0/0	0/0	0/0	1/1	1/1	0/1	0/0	0/0	1/1	1/1	0/0	0/1	1/1	./.	1/1	1/1	1/1	1/1	1/1	0/0	0/0	1/1	1/1	1/1	./.	0/1	0/0	1/1	1/1	1/1	0/0	0/0	1/1	1/1	1/1	0/0	1/1	./.	1/1	0/0	1/1	1/1
2	16708498	INS-2-16708498	C	CG	AC=80;AF=0.556;AN=144;BaseQRankSum=0.842;CSQ=G|upstream_gene_variant|MODIFIER||Zm00001d002610|Transcript|Zm00001d002610_T001|protein_coding|||||||||||69|1|||;DP=290;ExcessHet=0;FS=2.287;InbreedingCoeff=0.678;MLEAC=91;MLEAF=0.632;MQ=59.84;MQRankSum=0;QD=30.09;ReadPosRankSum=0.524;SOR=0.429	0/0	0/0	0/0	0/0	1/1	1/1	1/1	1/1	0/0	0/0	1/1	1/1	0/0	./.	1/1	1/1	1/1	1/1	1/1	1/1	1/1	0/0	0/0	1/1	1/1	1/1	./.	0/1	0/0	./.	1/1	1/1	0/0	0/0	1/1	1/1	1/1	0/0	1/1	./.	1/1	0/0	1/1	1/1
2	16708511	DEL-2-16708511	GACTTC	G	AC=80;AF=0.563;AN=142;BaseQRankSum=0.431;CSQ=-|upstream_gene_variant|MODIFIER||Zm00001d002610|Transcript|Zm00001d002610_T001|protein_coding|||||||||||52|1|||;DP=300;ExcessHet=0;FS=2.251;InbreedingCoeff=0.6768;MLEAC=93;MLEAF=0.655;MQ=59.85;MQRankSum=0;QD=27.91;ReadPosRankSum=1.28;SOR=0.544	0/0	0/0	0/0	0/0	1/1	1/1	1/1	1/1	0/0	0/0	1/1	1/1	0/0	./.	1/1	1/1	1/1	1/1	1/1	1/1	1/1	0/0	0/0	1/1	1/1	1/1	./.	0/1	0/0	./.	1/1	1/1	0/0	0/0	1/1	1/1	1/1	0/0	1/1	./.	1/1	0/0	1/1	1/1
2	16708537	DEL-2-16708537	TCCAGAA	T	AC=39;AF=0.279;AN=140;BaseQRankSum=-0.524;CSQ=-|upstream_gene_variant|MODIFIER||Zm00001d002610|Transcript|Zm00001d002610_T001|protein_coding|||||||||||25|1|||;DP=298;ExcessHet=0;FS=2.204;InbreedingCoeff=0.6589;MLEAC=38;MLEAF=0.271;MQ=59.91;MQRankSum=0;QD=29.46;ReadPosRankSum=0;SOR=0.503	1/1	1/1	./.	./.	0/0	0/0	0/0	0/0	1/1	0/0	0/0	0/0	0/0	./.	0/0	0/0	0/0	0/0	0/0	0/0	0/0	1/1	1/1	0/0	0/0	0/0	0/0	0/1	1/1	./.	0/0	0/0	1/1	./.	0/0	0/0	0/0	1/1	0/0	./.	0/0	1/1	0/0	0/0
2	16708594	SNP-2-16708594	C	T	AC=94;AF=0.61;AN=154;BaseQRankSum=-0.967;CSQ=T|5_prime_UTR_variant|MODIFIER||Zm00001d002610|Transcript|Zm00001d002610_T001|protein_coding|1/4||||27|||||||1|||;DP=334;ExcessHet=0;FS=0;InbreedingCoeff=0.7294;MLEAC=101;MLEAF=0.656;MQ=60;MQRankSum=0;QD=26.81;ReadPosRankSum=1.01;SOR=0.473	0/0	0/0	0/0	0/0	1/1	1/1	1/1	1/1	0/0	0/1	1/1	1/1	0/0	1/1	1/1	1/1	1/1	./.	1/1	1/1	1/1	0/0	0/0	1/1	1/1	1/1	1/1	0/1	0/0	1/1	1/1	1/1	0/0	./.	1/1	1/1	1/1	0/0	1/1	1/1	1/1	0/0	1/1	1/1
2	16708611	SNP-2-16708611	C	A	AC=40;AF=0.256;AN=156;BaseQRankSum=-0.967;CSQ=A|missense_variant|MODERATE||Zm00001d002610|Transcript|Zm00001d002610_T001|protein_coding|1/4||||44|16|6|L/I|Ctc/Atc|||1|||;DP=332;ExcessHet=0;FS=0;InbreedingCoeff=0.6712;MLEAC=37;MLEAF=0.237;MQ=60;MQRankSum=0;QD=26.91;ReadPosRankSum=0.598;SOR=1.061	1/1	1/1	1/1	1/1	0/0	0/0	0/0	0/0	1/1	0/0	0/0	0/0	0/0	0/0	0/0	0/0	0/0	0/0	0/0	0/0	0/0	1/1	1/1	0/0	0/0	0/0	0/0	0/1	1/1	0/0	0/0	0/0	1/1	0/0	0/0	0/0	0/0	1/1	0/0	0/0	0/0	1/1	0/0	0/0
2	16708626	SNP-2-16708626	T	C	AC=41;AF=0.266;AN=154;BaseQRankSum=0.674;CSQ=C|missense_variant|MODERATE||Zm00001d002610|Transcript|Zm00001d002610_T001|protein_coding|1/4||||59|31|11|F/L|Ttc/Ctc|||1|||;DP=333;ExcessHet=0;FS=0;InbreedingCoeff=0.6602;MLEAC=40;MLEAF=0.26;MQ=60;MQRankSum=0;QD=29.49;ReadPosRankSum=0.598;SOR=0.646	1/1	1/1	1/1	1/1	0/0	0/0	0/0	0/0	1/1	0/0	0/1	0/0	0/0	0/0	0/0	0/0	0/0	0/0	0/0	0/0	0/0	1/1	1/1	0/0	0/0	./.	0/0	0/1	1/1	0/0	0/0	0/0	1/1	0/0	0/0	0/0	0/0	1/1	0/0	0/0	0/0	1/1	0/0	0/0
2	16708696	SNP-2-16708696	G	A	AC=43;AF=0.279;AN=154;BaseQRankSum=-0.674;CSQ=A|missense_variant|MODERATE||Zm00001d002610|Transcript|Zm00001d002610_T001|protein_coding|1/4||||129|101|34|R/Q|cGg/cAg|||1|||;DP=304;ExcessHet=0;FS=2.881;InbreedingCoeff=0.6348;MLEAC=42;MLEAF=0.273;MQ=60;MQRankSum=0;QD=22.5;ReadPosRankSum=0.524;SOR=0.508	1/1	1/1	1/1	./.	0/0	0/0	0/0	0/0	1/1	0/1	1/1	0/0	0/0	0/0	0/0	0/0	0/0	0/0	0/0	0/0	0/0	1/1	1/1	0/0	0/0	0/0	0/0	0/1	1/1	0/0	0/0	0/0	1/1	0/0	0/0	0/0	0/0	1/1	./.	0/0	0/0	1/1	0/0	0/0
2	16708709	SNP-2-16708709	A	G	AC=81;AF=0.587;AN=138;BaseQRankSum=1.15;CSQ=G|synonymous_variant|LOW||Zm00001d002610|Transcript|Zm00001d002610_T001|protein_coding|1/4||||142|114|38|P|ccA/ccG|||1|||;DP=315;ExcessHet=0;FS=0;InbreedingCoeff=0.6784;MLEAC=96;MLEAF=0.696;MQ=60;MQRankSum=0;QD=26.37;ReadPosRankSum=-1.15;SOR=0.738	0/0	0/0	0/0	./.	1/1	1/1	1/1	1/1	./.	0/1	0/0	1/1	0/0	1/1	1/1	1/1	./.	./.	1/1	./.	1/1	0/0	0/0	1/1	1/1	./.	1/1	0/1	0/0	./.	1/1	1/1	0/0	0/1	1/1	1/1	1/1	0/0	./.	1/1	./.	0/0	1/1	1/1
2	16709096	SNP-2-16709096	G	A	AC=76;AF=0.528;AN=144;BaseQRankSum=-1.645;CSQ=A|synonymous_variant|LOW||Zm00001d002610|Transcript|Zm00001d002610_T001|protein_coding|1/4||||529|501|167|L|ctG/ctA|||1|||;DP=291;ExcessHet=0;FS=5.069;InbreedingCoeff=0.6619;MLEAC=85;MLEAF=0.59;MQ=60;MQRankSum=0;QD=25.15;ReadPosRankSum=0;SOR=0.361	0/0	./.	0/0	0/0	0/0	./.	1/1	./.	0/0	0/1	0/1	1/1	0/0	1/1	1/1	1/1	1/1	./.	1/1	1/1	1/1	0/0	0/0	1/1	./.	1/1	1/1	0/1	0/0	1/1	1/1	1/1	0/0	0/1	1/1	1/1	1/1	0/0	./.	1/1	./.	0/0	./.	1/1
2	16709161	SNP-2-16709161	A	G	AC=85;AF=0.552;AN=154;BaseQRankSum=0.967;CSQ=G|missense_variant|MODERATE||Zm00001d002610|Transcript|Zm00001d002610_T001|protein_coding|1/4||||594|566|189|N/S|aAc/aGc|||1|||;DP=317;ExcessHet=0;FS=0;InbreedingCoeff=0.6718;MLEAC=90;MLEAF=0.584;MQ=60;MQRankSum=0;QD=27.3;ReadPosRankSum=0.967;SOR=0.716	0/0	0/0	0/0	0/0	1/1	1/1	1/1	0/1	0/0	0/0	0/1	1/1	0/0	1/1	1/1	1/1	1/1	1/1	1/1	1/1	1/1	0/0	0/0	1/1	./.	1/1	1/1	0/1	0/0	./.	1/1	1/1	0/0	0/1	1/1	1/1	1/1	0/0	1/1	1/1	1/1	0/0	1/1	1/1
2	16709354	SNP-2-16709354	C	T	AC=86;AF=0.538;AN=160;BaseQRankSum=-0.524;CSQ=T|synonymous_variant|LOW||Zm00001d002610|Transcript|Zm00001d002610_T001|protein_coding|1/4||||787|759|253|D|gaC/gaT|||1|||;DP=376;ExcessHet=0;FS=0;InbreedingCoeff=0.7784;MLEAC=90;MLEAF=0.563;MQ=59.93;MQRankSum=0;QD=25.72;ReadPosRankSum=-1.282;SOR=0.433	0/0	0/0	0/0	0/0	0/0	1/1	1/1	0/1	0/0	0/0	0/0	1/1	0/0	1/1	1/1	0/0	1/1	1/1	1/1	1/1	1/1	0/0	0/0	1/1	1/1	1/1	1/1	0/1	0/0	1/1	1/1	1/1	0/0	0/0	1/1	1/1	1/1	0/0	1/1	1/1	1/1	0/0	1/1	1/1
2	16709401	SNP-2-16709401	C	A	AC=81;AF=0.54;AN=150;BaseQRankSum=-1.15;CSQ=A|splice_region_variant&intron_variant|LOW||Zm00001d002610|Transcript|Zm00001d002610_T001|protein_coding||1/3||||||||||1|||;DP=370;ExcessHet=0;FS=3.197;InbreedingCoeff=0.7307;MLEAC=87;MLEAF=0.58;MQ=58.74;MQRankSum=-0.489;QD=31.07;ReadPosRankSum=0.319;SOR=0.582	0/0	0/0	0/0	0/0	0/0	1/1	1/1	0/1	0/0	0/1	./.	1/1	0/0	1/1	./.	0/0	1/1	1/1	1/1	1/1	1/1	0/0	0/0	1/1	1/1	1/1	1/1	0/1	0/0	1/1	1/1	1/1	0/0	1/1	1/1	1/1	1/1	0/0	./.	1/1	1/1	0/0	1/1	1/1
2	16709416	INS-2-16709416	C	CTCCGTAG	AC=87;AF=0.572;AN=152;BaseQRankSum=0;CSQ=TCCGTAG|intron_variant|MODIFIER||Zm00001d002610|Transcript|Zm00001d002610_T001|protein_coding||1/3||||||||||1|||;DP=377;ExcessHet=0;FS=3.097;InbreedingCoeff=0.7364;MLEAC=94;MLEAF=0.618;MQ=58.72;MQRankSum=-0.566;QD=26.07;ReadPosRankSum=0.792;SOR=0.492	0/0	0/0	0/0	0/0	1/1	1/1	1/1	0/1	0/0	0/1	./.	1/1	0/0	1/1	0/0	1/1	1/1	1/1	1/1	1/1	1/1	0/0	0/0	1/1	1/1	1/1	1/1	0/1	0/0	1/1	1/1	1/1	0/0	1/1	1/1	1/1	1/1	0/0	./.	1/1	1/1	0/0	1/1	1/1
2	16709435	INS-2-16709435	A	AGTGCAGACGGGAC	AC=87;AF=0.565;AN=154;BaseQRankSum=-0.674;CSQ=GTGCAGACGGGAC|intron_variant|MODIFIER||Zm00001d002610|Transcript|Zm00001d002610_T001|protein_coding||1/3||||||||||1|||;DP=382;ExcessHet=0;FS=1.301;InbreedingCoeff=0.7435;MLEAC=93;MLEAF=0.604;MQ=58.74;MQRankSum=-0.431;QD=32.16;ReadPosRankSum=-0.18;SOR=0.623	0/0	0/0	0/0	0/0	1/1	1/1	1/1	0/1	0/0	0/1	0/0	1/1	0/0	1/1	0/0	1/1	1/1	1/1	1/1	1/1	1/1	0/0	0/0	1/1	1/1	1/1	1/1	0/1	0/0	1/1	1/1	1/1	0/0	1/1	1/1	1/1	1/1	0/0	./.	1/1	1/1	0/0	1/1	1/1
2	16709477	DEL-2-16709477	AT	A	AC=89;AF=0.593;AN=150;BaseQRankSum=-0.674;CSQ=-|splice_polypyrimidine_tract_variant&intron_variant|LOW||Zm00001d002610|Transcript|Zm00001d002610_T001|protein_coding||1/3||||||||||1|||;DP=347;ExcessHet=0;FS=1.339;InbreedingCoeff=0.7152;MLEAC=96;MLEAF=0.64;MQ=58.61;MQRankSum=0;QD=28.29;ReadPosRankSum=-0.674;SOR=0.692	0/0	0/0	0/0	0/0	1/1	1/1	1/1	1/1	0/0	0/1	0/1	1/1	0/0	1/1	./.	1/1	1/1	1/1	1/1	1/1	1/1	0/0	0/0	1/1	1/1	1/1	1/1	0/1	0/0	1/1	1/1	1/1	0/0	1/1	1/1	1/1	1/1	0/0	./.	1/1	1/1	0/0	1/1	1/1
2	16709651	SNP-2-16709651	A	G	AC=27;AF=0.18;AN=150;BaseQRankSum=0.431;CSQ=G|missense_variant|MODERATE||Zm00001d002610|Transcript|Zm00001d002610_T001|protein_coding|2/4||||987|959|320|K/R|aAg/aGg|||1|||;DP=342;ExcessHet=0;FS=0;InbreedingCoeff=0.6583;MLEAC=24;MLEAF=0.16;MQ=59.8;MQRankSum=-0.431;QD=24.16;ReadPosRankSum=0;SOR=0.304	1/1	0/0	0/0	0/0	1/1	0/0	0/0	./.	0/0	0/0	./.	0/0	./.	0/0	0/0	1/1	0/0	0/0	0/0	0/0	0/0	0/0	1/1	0/0	0/0	0/0	0/0	0/0	1/1	./.	0/0	0/0	1/1	0/1	0/0	0/0	0/0	0/0	0/0	0/0	0/0	0/0	0/0	0/0
2	16709708	DEL-2-16709708	ACGG	A	AC=14;AF=0.088;AN=160;CSQ=-|inframe_deletion|MODERATE||Zm00001d002610|Transcript|Zm00001d002610_T001|protein_coding|2/4||||1045-1047|1017-1019|339-340|DG/D|gaCGGc/gac|||1|||;DP=341;ExcessHet=0;FS=0;InbreedingCoeff=0.5884;MLEAC=12;MLEAF=0.075;MQ=60;QD=28.85;SOR=0.984	0/0	0/0	0/0	0/0	1/1	0/0	0/0	0/0	0/0	0/0	0/0	0/0	0/0	0/0	0/0	1/1	0/0	0/0	0/0	0/0	0/0	0/0	0/0	0/0	0/0	0/0	0/0	0/0	0/0	0/0	0/0	0/0	0/0	0/0	0/0	0/0	0/0	0/0	0/0	0/0	0/0	0/0	0/0	0/0
2	16709835	INS-2-16709835	C	CTA	AC=79;AF=0.534;AN=148;BaseQRankSum=0.366;CSQ=TA|splice_region_variant&intron_variant|LOW||Zm00001d002610|Transcript|Zm00001d002610_T001|protein_coding||2/3||||||||||1|||;DP=349;ExcessHet=0;FS=0;InbreedingCoeff=0.7162;MLEAC=88;MLEAF=0.595;MQ=60;MQRankSum=0;QD=30.32;ReadPosRankSum=0;SOR=0.497	./.	0/0	0/0	0/0	0/0	1/1	1/1	1/1	0/0	0/0	./.	1/1	0/0	1/1	./.	0/0	1/1	1/1	1/1	1/1	1/1	0/0	0/0	1/1	1/1	1/1	1/1	0/1	0/0	1/1	1/1	0/1	0/0	0/1	1/1	1/1	1/1	0/0	1/1	1/1	1/1	0/0	1/1	1/1
2	16709899	SNP-2-16709899	C	T	AC=128;AF=0.889;AN=144;CSQ=T|intron_variant|MODIFIER||Zm00001d002610|Transcript|Zm00001d002610_T001|protein_coding||2/3||||||||||1|||;DP=365;ExcessHet=0;FS=0;InbreedingCoeff=0.6564;MLEAC=142;MLEAF=0.986;MQ=60;QD=29.55;SOR=0.7	0/0	1/1	1/1	1/1	0/0	1/1	1/1	1/1	1/1	1/1	1/1	./.	1/1	1/1	./.	1/1	1/1	./.	1/1	./.	1/1	1/1	1/1	1/1	1/1	1/1	1/1	1/1	./.	1/1	1/1	1/1	1/1	1/1	1/1	1/1	1/1	1/1	1/1	1/1	1/1	1/1	1/1	1/1
2	16710075	SNP-2-16710075	G	A	AC=12;AF=0.078;AN=154;BaseQRankSum=-0.431;CSQ=A|synonymous_variant|LOW||Zm00001d002610|Transcript|Zm00001d002610_T001|protein_coding|3/4||||1282|1254|418|A|gcG/gcA|||1|||;DP=343;ExcessHet=0;FS=14.589;InbreedingCoeff=0.4621;MLEAC=12;MLEAF=0.078;MQ=60;MQRankSum=0;QD=18.28;ReadPosRankSum=1.65;SOR=0.878	1/1	0/0	0/0	0/0	0/0	0/0	0/0	0/0	0/0	0/0	0/0	./.	0/0	0/0	./.	0/0	0/0	0/0	0/0	0/0	0/0	0/0	1/1	0/0	0/0	0/0	0/0	0/0	1/1	0/0	0/0	0/1	1/1	0/1	0/0	0/0	0/0	0/0	0/0	0/0	0/0	0/0	0/0	0/0
2	16710099	SNP-2-16710099	G	C	AC=77;AF=0.52;AN=148;BaseQRankSum=-0.18;CSQ=C|missense_variant|MODERATE||Zm00001d002610|Transcript|Zm00001d002610_T001|protein_coding|3/4||||1306|1278|426|E/D|gaG/gaC|||1|||;DP=365;ExcessHet=0;FS=3.029;InbreedingCoeff=0.7156;MLEAC=84;MLEAF=0.568;MQ=60;MQRankSum=0;QD=26.52;ReadPosRankSum=-0.21;SOR=0.298	0/0	0/0	0/0	0/0	0/0	1/1	1/1	1/1	0/0	1/1	./.	1/1	0/1	0/1	./.	0/0	1/1	./.	./.	0/1	1/1	0/0	0/0	1/1	1/1	1/1	1/1	0/1	0/0	1/1	1/1	0/1	0/0	0/0	1/1	1/1	1/1	0/0	1/1	1/1	1/1	0/0	1/1	1/1
2	16710148	SNP-2-16710148	T	C	AC=72;AF=0.493;AN=146;BaseQRankSum=-0.674;CSQ=C|missense_variant|MODERATE||Zm00001d002610|Transcript|Zm00001d002610_T001|protein_coding|3/4||||1355|1327|443|F/L|Ttc/Ctc|||1|||;DP=350;ExcessHet=0;FS=1.35;InbreedingCoeff=0.6936;MLEAC=78;MLEAF=0.534;MQ=60;MQRankSum=0;QD=26.5;ReadPosRankSum=0.319;SOR=0.383	0/0	0/0	0/0	0/0	0/0	1/1	1/1	0/1	0/0	./.	0/0	1/1	0/0	0/1	./.	0/0	1/1	./.	./.	1/1	1/1	0/0	0/0	1/1	1/1	1/1	1/1	0/1	0/0	1/1	1/1	1/1	0/0	0/1	1/1	1/1	1/1	0/0	1/1	1/1	1/1	0/0	1/1	1/1
2	16710175	INS-2-16710175	G	GTTCGA	AC=97;AF=0.647;AN=150;BaseQRankSum=-0.842;CSQ=TTCGA|intron_variant|MODIFIER||Zm00001d002610|Transcript|Zm00001d002610_T001|protein_coding||3/3||||||||||1|||;DP=387;ExcessHet=0;FS=2.397;InbreedingCoeff=0.7584;MLEAC=107;MLEAF=0.713;MQ=60;MQRankSum=0;QD=32.72;ReadPosRankSum=1.65;SOR=0.459	1/1	0/0	0/0	0/0	0/0	1/1	1/1	1/1	0/0	1/1	0/0	1/1	./.	1/1	1/1	0/0	./.	./.	1/1	1/1	1/1	0/0	1/1	1/1	1/1	1/1	1/1	0/1	1/1	1/1	1/1	1/1	1/1	1/1	1/1	1/1	1/1	0/0	1/1	1/1	1/1	0/0	1/1	1/1
2	16710232	SNP-2-16710232	C	A	AC=89;AF=0.571;AN=156;BaseQRankSum=0;CSQ=A|intron_variant|MODIFIER||Zm00001d002610|Transcript|Zm00001d002610_T001|protein_coding||3/3||||||||||1|||;DP=377;ExcessHet=0;FS=1.363;InbreedingCoeff=0.7474;MLEAC=93;MLEAF=0.596;MQ=60;MQRankSum=0;QD=26.52;ReadPosRankSum=1.03;SOR=0.484	0/0	0/0	./.	0/0	0/0	1/1	1/1	1/1	0/0	1/1	0/1	1/1	1/1	1/1	1/1	0/0	1/1	1/1	1/1	1/1	1/1	0/0	0/0	1/1	1/1	1/1	1/1	0/0	0/0	1/1	1/1	0/1	0/0	0/1	1/1	1/1	1/1	0/0	1/1	1/1	./.	0/0	1/1	1/1
2	16710249	SNP-2-16710249	C	G	AC=11;AF=0.07;AN=158;BaseQRankSum=2.37;CSQ=G|splice_region_variant&splice_polypyrimidine_tract_variant&intron_variant|LOW||Zm00001d002610|Transcript|Zm00001d002610_T001|protein_coding||3/3||||||||||1|||;DP=360;ExcessHet=0;FS=7.574;InbreedingCoeff=0.485;MLEAC=10;MLEAF=0.063;MQ=60;MQRankSum=0;QD=18.69;ReadPosRankSum=-0.992;SOR=0.626	1/1	0/0	0/0	0/0	0/0	0/0	0/0	0/0	0/0	0/0	0/0	0/0	0/0	0/0	0/0	0/0	0/0	0/0	0/0	0/0	0/0	0/0	1/1	0/0	0/0	0/0	0/0	0/0	1/1	0/0	0/0	0/0	1/1	0/1	0/0	0/0	0/0	0/0	0/0	0/0	0/0	0/0	0/0	0/0
2	16710295	SNP-2-16710295	G	A	AC=88;AF=0.579;AN=152;BaseQRankSum=-0.967;CSQ=A|synonymous_variant|LOW||Zm00001d002610|Transcript|Zm00001d002610_T001|protein_coding|4/4||||1411|1383|461|R|agG/agA|||1|||;DP=362;ExcessHet=0;FS=1.6;InbreedingCoeff=0.7186;MLEAC=94;MLEAF=0.618;MQ=60;MQRankSum=0;QD=26.14;ReadPosRankSum=-0.21;SOR=1.071	0/0	0/0	0/0	0/0	0/0	1/1	1/1	1/1	./.	1/1	0/1	1/1	0/1	1/1	1/1	0/0	1/1	1/1	1/1	1/1	1/1	0/0	0/0	1/1	1/1	1/1	1/1	0/0	0/0	1/1	1/1	0/1	0/0	0/1	1/1	1/1	1/1	0/0	1/1	1/1	1/1	./.	1/1	1/1
2	16710328	SNP-2-16710328	C	T	AC=10;AF=0.063;AN=158;CSQ=T|synonymous_variant|LOW||Zm00001d002610|Transcript|Zm00001d002610_T001|protein_coding|4/4||||1444|1416|472|Y|taC/taT|||1|||;DP=335;ExcessHet=0;FS=0;InbreedingCoeff=0.4812;MLEAC=9;MLEAF=0.057;MQ=60;QD=22.18;SOR=1.136	1/1	0/0	0/0	0/0	0/0	0/0	0/0	0/0	0/0	0/0	0/0	0/0	0/0	0/0	0/0	0/0	0/0	0/0	0/0	0/0	0/0	0/0	1/1	0/0	0/0	0/0	0/0	0/0	1/1	0/0	0/0	0/0	1/1	0/0	0/0	0/0	0/0	0/0	0/0	0/0	0/0	./.	0/0	0/0
2	16710358	SNP-2-16710358	C	G	AC=8;AF=0.051;AN=156;CSQ=G|missense_variant|MODERATE||Zm00001d002610|Transcript|Zm00001d002610_T001|protein_coding|4/4||||1474|1446|482|N/K|aaC/aaG|||1|||;DP=364;ExcessHet=0;FS=0;InbreedingCoeff=0.4964;MLEAC=6;MLEAF=0.038;MQ=60;QD=22.98;SOR=2.419	./.	0/0	0/0	0/0	0/0	0/0	0/0	0/0	0/0	0/0	0/0	0/0	0/0	0/0	0/0	0/0	0/0	0/0	0/0	0/0	0/0	0/0	1/1	0/0	0/0	0/0	0/0	0/0	1/1	0/0	0/0	0/0	1/1	./.	0/0	0/0	0/0	0/0	0/0	0/0	0/0	0/0	0/0	0/0
2	16710458	INS-2-16710458	C	CA	AC=140;AF=0.897;AN=156;CSQ=A|3_prime_UTR_variant|MODIFIER||Zm00001d002610|Transcript|Zm00001d002610_T001|protein_coding|4/4||||1574-1575|||||||1|||;DP=360;ExcessHet=0;FS=0;InbreedingCoeff=0.6141;MLEAC=145;MLEAF=0.929;MQ=59.91;QD=31.05;SOR=0.882	1/1	1/1	1/1	1/1	0/0	1/1	1/1	1/1	1/1	0/0	1/1	1/1	0/0	1/1	1/1	1/1	1/1	1/1	1/1	1/1	1/1	1/1	1/1	1/1	1/1	1/1	1/1	1/1	1/1	1/1	1/1	1/1	1/1	1/1	1/1	1/1	1/1	1/1	1/1	1/1	1/1	1/1	./.	1/1
2	16710485	INS-2-16710485	A	AGTGT	AC=11;AF=0.071;AN=156;BaseQRankSum=-0.253;CSQ=GTGT|3_prime_UTR_variant|MODIFIER||Zm00001d002610|Transcript|Zm00001d002610_T001|protein_coding|4/4||||1601-1602|||||||1|||;DP=332;ExcessHet=0;FS=0;InbreedingCoeff=0.4528;MLEAC=8;MLEAF=0.051;MQ=58.62;MQRankSum=0;QD=29.62;ReadPosRankSum=1.28;SOR=0.693	1/1	0/0	0/0	0/0	0/0	0/0	0/0	0/0	0/0	0/0	0/0	0/0	0/0	0/0	0/0	0/0	0/0	0/0	0/0	0/0	0/0	0/0	1/1	0/0	0/0	0/0	0/0	0/0	1/1	0/0	0/0	0/1	1/1	0/0	0/0	0/0	0/0	0/0	0/0	0/0	0/0	0/0	0/0	0/0
2	16710525	SNP-2-16710525	C	G	AC=9;AF=0.058;AN=154;BaseQRankSum=0.842;CSQ=G|3_prime_UTR_variant|MODIFIER||Zm00001d002610|Transcript|Zm00001d002610_T001|protein_coding|4/4||||1641|||||||1|||;DP=259;ExcessHet=0;FS=0;InbreedingCoeff=0.3334;MLEAC=6;MLEAF=0.039;MQ=58.34;MQRankSum=0;QD=23.82;ReadPosRankSum=-0.524;SOR=0.368	1/1	0/0	0/0	0/0	0/0	0/0	0/0	0/0	0/0	0/0	0/0	0/0	0/0	0/0	0/0	0/0	0/0	0/0	0/0	0/0	0/0	0/0	./.	0/0	0/0	0/0	0/0	0/0	1/1	0/0	0/0	0/1	1/1	0/0	0/0	0/0	0/0	0/0	0/0	0/0	0/0	0/0	0/0	0/0
6	126141759	SNP-6-126141759	T	C	AC=23;AF=0.147;AN=156;BaseQRankSum=0.967;CSQ=C|3_prime_UTR_variant|MODIFIER||Zm00001d037465|Transcript|Zm00001d037465_T001|protein_coding|11/11||||4220|||||||-1|||,C|3_prime_UTR_variant|MODIFIER||Zm00001d037465|Transcript|Zm00001d037465_T002|protein_coding|11/11||||4815|||||||-1|||,C|3_prime_UTR_variant|MODIFIER||Zm00001d037465|Transcript|Zm00001d037465_T003|protein_coding|10/10||||4917|||||||-1|…	1/1	0/0	0/0	1/1	0/0	0/0	0/0	0/0	0/0	0/1	0/0	0/0	0/0	0/0	0/0	0/0	0/0	0/0	0/0	1/1	0/0	0/0	0/0	0/0	0/0	0/0	0/0	0/0	1/1	0/0	0/0	0/0	0/0	0/0	0/0	0/0	0/0	0/0	0/0	0/0	0/0	0/0	0/0	0/0
6	126141862	INS-6-126141862	G	GA	AC=22;AF=0.145;AN=152;CSQ=A|3_prime_UTR_variant|MODIFIER||Zm00001d037465|Transcript|Zm00001d037465_T001|protein_coding|11/11||||4116-4117|||||||-1|||,A|3_prime_UTR_variant|MODIFIER||Zm00001d037465|Transcript|Zm00001d037465_T002|protein_coding|11/11||||4711-4712|||||||-1|||,A|3_prime_UTR_variant|MODIFIER||Zm00001d037465|Transcript|Zm00001d037465_T003|protein_coding|10/10||||4813-4814|||||||-1|||,A…	1/1	0/0	0/0	./.	0/0	0/0	0/0	0/0	0/0	./.	0/0	0/0	0/0	0/0	0/0	0/0	0/0	./.	0/0	0/0	0/0	0/0	0/0	0/0	0/0	0/0	0/0	0/0	1/1	0/0	0/0	0/0	0/0	1/1	0/0	0/0	0/0	0/0	0/0	0/0	./.	0/0	0/0	0/0
6	126141905	SNP-6-126141905	G	A	AC=24;AF=0.154;AN=156;CSQ=A|3_prime_UTR_variant|MODIFIER||Zm00001d037465|Transcript|Zm00001d037465_T001|protein_coding|11/11||||4074|||||||-1|||,A|3_prime_UTR_variant|MODIFIER||Zm00001d037465|Transcript|Zm00001d037465_T002|protein_coding|11/11||||4669|||||||-1|||,A|3_prime_UTR_variant|MODIFIER||Zm00001d037465|Transcript|Zm00001d037465_T003|protein_coding|10/10||||4771|||||||-1|||,A|3_prime_UTR_va…	1/1	0/0	0/0	./.	0/0	0/0	0/0	0/0	0/0	0/0	0/0	0/0	0/0	0/0	0/0	0/0	0/0	0/0	0/0	1/1	0/0	0/0	0/0	0/0	0/0	0/0	0/0	0/0	1/1	0/0	0/0	0/0	0/0	1/1	0/0	0/0	0/0	0/0	0/0	0/0	0/0	0/0	0/0	./.
6	126142455	SNP-6-126142455	G	T	AC=18;AF=0.12;AN=150;CSQ=T|3_prime_UTR_variant|MODIFIER||Zm00001d037465|Transcript|Zm00001d037465_T001|protein_coding|11/11||||3524|||||||-1|||,T|synonymous_variant|LOW||Zm00001d037465|Transcript|Zm00001d037465_T002|protein_coding|11/11||||4119|3258|1086|L|ctC/ctA|||-1|||,T|synonymous_variant|LOW||Zm00001d037465|Transcript|Zm00001d037465_T003|protein_coding|10/10||||4221|3360|1120|L|ctC/ctA|||-1|…	1/1	0/0	0/0	0/0	0/0	0/0	0/0	0/0	0/0	./.	0/0	0/0	0/0	0/0	0/0	0/0	0/0	0/0	0/0	0/0	0/0	0/0	0/0	0/0	0/0	0/0	0/0	0/0	./.	0/0	0/0	0/0	0/0	./.	0/0	0/0	0/0	0/0	0/0	0/0	0/0	0/0	0/0	./.
6	126142608	SNP-6-126142608	G	A	AC=132;AF=0.835;AN=158;CSQ=A|3_prime_UTR_variant|MODIFIER||Zm00001d037465|Transcript|Zm00001d037465_T001|protein_coding|11/11||||3371|||||||-1|||,A|synonymous_variant|LOW||Zm00001d037465|Transcript|Zm00001d037465_T002|protein_coding|11/11||||3966|3105|1035|D|gaC/gaT|||-1|||,A|synonymous_variant|LOW||Zm00001d037465|Transcript|Zm00001d037465_T003|protein_coding|10/10||||4068|3207|1069|D|gaC/gaT|||-…	1/1	1/1	1/1	0/0	1/1	1/1	0/0	1/1	1/1	1/1	1/1	./.	1/1	1/1	1/1	1/1	1/1	1/1	1/1	1/1	0/0	1/1	1/1	0/0	0/0	0/0	1/1	1/1	1/1	1/1	1/1	1/1	1/1	1/1	1/1	1/1	1/1	1/1	1/1	1/1	1/1	1/1	1/1	0/0
6	126142642	SNP-6-126142642	A	G	AC=101;AF=0.647;AN=156;BaseQRankSum=0.842;CSQ=G|3_prime_UTR_variant|MODIFIER||Zm00001d037465|Transcript|Zm00001d037465_T001|protein_coding|11/11||||3337|||||||-1|||,G|missense_variant|MODERATE||Zm00001d037465|Transcript|Zm00001d037465_T002|protein_coding|11/11||||3932|3071|1024|I/T|aTc/aCc|||-1|||,G|missense_variant|MODERATE||Zm00001d037465|Transcript|Zm00001d037465_T003|protein_coding|10/10||||4…	0/0	1/1	1/1	0/0	1/1	1/1	0/0	1/1	1/1	./.	1/1	./.	1/1	1/1	1/1	1/1	1/1	1/1	1/1	0/0	0/0	1/1	1/1	0/0	0/0	0/0	1/1	1/1	0/0	0/0	1/1	1/1	0/0	0/0	1/1	1/1	1/1	1/1	1/1	1/1	1/1	1/1	1/1	0/0
6	126142655	SNP-6-126142655	A	C	AC=21;AF=0.136;AN=154;BaseQRankSum=-1.282;CSQ=C|3_prime_UTR_variant|MODIFIER||Zm00001d037465|Transcript|Zm00001d037465_T001|protein_coding|11/11||||3324|||||||-1|||,C|missense_variant|MODERATE||Zm00001d037465|Transcript|Zm00001d037465_T002|protein_coding|11/11||||3919|3058|1020|F/V|Ttt/Gtt|||-1|||,C|missense_variant|MODERATE||Zm00001d037465|Transcript|Zm00001d037465_T003|protein_coding|10/10||||4…	1/1	0/0	0/0	0/0	0/0	0/0	0/0	0/0	0/0	./.	0/0	0/0	0/0	0/0	0/0	0/0	0/0	0/0	0/0	0/0	0/0	0/0	0/0	0/0	0/0	./.	0/0	0/0	1/1	0/0	0/0	0/0	0/0	0/1	0/0	0/0	0/0	0/0	0/0	0/0	0/0	0/0	0/0	0/0
6	126142776	SNP-6-126142776	A	G	AC=118;AF=0.819;AN=144;CSQ=G|intron_variant|MODIFIER||Zm00001d037465|Transcript|Zm00001d037465_T001|protein_coding||10/10||||||||||-1|||,G|intron_variant|MODIFIER||Zm00001d037465|Transcript|Zm00001d037465_T002|protein_coding||10/10||||||||||-1|||,G|intron_variant|MODIFIER||Zm00001d037465|Transcript|Zm00001d037465_T003|protein_coding||9/9||||||||||-1|||,G|intron_variant|MODIFIER||Zm00001d037465|Tr…	1/1	1/1	1/1	0/0	1/1	1/1	0/0	1/1	1/1	1/1	1/1	1/1	1/1	./.	./.	1/1	1/1	1/1	1/1	./.	0/0	1/1	1/1	0/0	0/0	0/0	1/1	1/1	1/1	1/1	1/1	1/1	1/1	1/1	1/1	1/1	1/1	1/1	1/1	1/1	1/1	1/1	1/1	0/0
6	126143279	SNP-6-126143279	T	G	AC=120;AF=0.833;AN=144;CSQ=G|3_prime_UTR_variant|MODIFIER||Zm00001d037465|Transcript|Zm00001d037465_T001|protein_coding|10/11||||3143|||||||-1|||,G|synonymous_variant|LOW||Zm00001d037465|Transcript|Zm00001d037465_T002|protein_coding|10/11||||3738|2877|959|L|ctA/ctC|||-1|||,G|synonymous_variant|LOW||Zm00001d037465|Transcript|Zm00001d037465_T003|protein_coding|9/10||||3840|2979|993|L|ctA/ctC|||-1||…	1/1	1/1	./.	0/0	1/1	1/1	./.	1/1	1/1	1/1	1/1	./.	./.	1/1	1/1	1/1	1/1	1/1	1/1	1/1	0/0	./.	1/1	0/0	0/0	0/0	1/1	1/1	1/1	1/1	1/1	1/1	1/1	1/1	1/1	1/1	1/1	1/1	1/1	1/1	1/1	1/1	1/1	0/0
6	126143336	SNP-6-126143336	G	A	AC=122;AF=0.824;AN=148;CSQ=A|3_prime_UTR_variant|MODIFIER||Zm00001d037465|Transcript|Zm00001d037465_T001|protein_coding|10/11||||3086|||||||-1|||,A|synonymous_variant|LOW||Zm00001d037465|Transcript|Zm00001d037465_T002|protein_coding|10/11||||3681|2820|940|Y|taC/taT|||-1|||,A|synonymous_variant|LOW||Zm00001d037465|Transcript|Zm00001d037465_T003|protein_coding|9/10||||3783|2922|974|Y|taC/taT|||-1||…	1/1	1/1	1/1	0/0	./.	1/1	0/0	1/1	1/1	1/1	1/1	1/1	1/1	1/1	1/1	./.	1/1	1/1	1/1	./.	0/0	./.	1/1	0/0	0/0	0/0	1/1	1/1	1/1	1/1	1/1	1/1	1/1	1/1	1/1	1/1	1/1	1/1	1/1	1/1	1/1	1/1	1/1	0/0
6	126143434	SNP-6-126143434	C	T	AC=21;AF=0.138;AN=152;BaseQRankSum=-0.842;CSQ=T|intron_variant|MODIFIER||Zm00001d037465|Transcript|Zm00001d037465_T001|protein_coding||9/10||||||||||-1|||,T|intron_variant|MODIFIER||Zm00001d037465|Transcript|Zm00001d037465_T002|protein_coding||9/10||||||||||-1|||,T|intron_variant|MODIFIER||Zm00001d037465|Transcript|Zm00001d037465_T003|protein_coding||8/9||||||||||-1|||,T|intron_variant|MODIFIER||…	1/1	0/0	0/0	0/0	0/0	0/0	0/0	0/0	0/0	0/1	0/0	0/0	0/0	0/0	0/0	0/0	0/0	0/0	0/0	./.	0/0	0/0	0/0	0/0	0/0	0/0	0/0	0/0	1/1	0/0	0/0	0/0	./.	0/0	0/0	0/0	0/0	0/0	0/0	0/0	0/0	0/0	0/0	0/0
6	126143484	SNP-6-126143484	A	C	AC=101;AF=0.664;AN=152;BaseQRankSum=0.967;CSQ=C|intron_variant|MODIFIER||Zm00001d037465|Transcript|Zm00001d037465_T001|protein_coding||9/10||||||||||-1|||,C|intron_variant|MODIFIER||Zm00001d037465|Transcript|Zm00001d037465_T002|protein_coding||9/10||||||||||-1|||,C|intron_variant|MODIFIER||Zm00001d037465|Transcript|Zm00001d037465_T003|protein_coding||8/9||||||||||-1|||,C|intron_variant|MODIFIER||…	0/0	1/1	1/1	0/0	1/1	1/1	0/0	1/1	1/1	0/1	1/1	1/1	1/1	1/1	1/1	1/1	1/1	1/1	1/1	./.	0/0	1/1	1/1	0/0	0/0	0/0	1/1	1/1	0/0	0/0	1/1	1/1	0/0	0/0	1/1	1/1	1/1	1/1	1/1	1/1	1/1	1/1	1/1	0/0
6	126143508	SNP-6-126143508	T	C	AC=24;AF=0.156;AN=154;CSQ=C|intron_variant|MODIFIER||Zm00001d037465|Transcript|Zm00001d037465_T001|protein_coding||9/10||||||||||-1|||,C|intron_variant|MODIFIER||Zm00001d037465|Transcript|Zm00001d037465_T002|protein_coding||9/10||||||||||-1|||,C|intron_variant|MODIFIER||Zm00001d037465|Transcript|Zm00001d037465_T003|protein_coding||8/9||||||||||-1|||,C|intron_variant|MODIFIER||Zm00001d037465|Trans…	1/1	0/0	0/0	0/0	0/0	0/0	0/0	0/0	0/0	0/0	0/0	0/0	0/0	0/0	0/0	0/0	0/0	0/0	0/0	./.	0/0	0/0	0/0	0/0	0/0	0/0	0/0	0/0	1/1	1/1	0/0	0/0	./.	1/1	0/0	0/0	0/0	0/0	0/0	0/0	0/0	0/0	0/0	0/0
6	126145740	INS-6-126145740	C	CTCGATCCTA	AC=18;AF=0.127;AN=142;CSQ=TCGATCCTA|intron_variant|MODIFIER||Zm00001d037465|Transcript|Zm00001d037465_T001|protein_coding||9/10||||||||||-1|||,TCGATCCTA|intron_variant|MODIFIER||Zm00001d037465|Transcript|Zm00001d037465_T002|protein_coding||9/10||||||||||-1|||,TCGATCCTA|intron_variant|MODIFIER||Zm00001d037465|Transcript|Zm00001d037465_T003|protein_coding||8/9||||||||||-1|||,TCGATCCTA|intron_varian…	1/1	0/0	0/0	0/0	0/0	0/0	./.	0/0	0/0	0/0	0/0	0/0	0/0	0/0	0/0	0/0	0/0	0/0	0/0	./.	0/0	0/0	0/0	0/0	0/0	0/0	0/0	./.	./.	./.	0/0	0/0	1/1	1/1	./.	0/0	0/0	0/0	0/0	0/0	0/0	0/0	0/0	0/0
6	126145753	SNP-6-126145753	C	T	AC=14;AF=0.099;AN=142;CSQ=T|intron_variant|MODIFIER||Zm00001d037465|Transcript|Zm00001d037465_T001|protein_coding||9/10||||||||||-1|||,T|intron_variant|MODIFIER||Zm00001d037465|Transcript|Zm00001d037465_T002|protein_coding||9/10||||||||||-1|||,T|intron_variant|MODIFIER||Zm00001d037465|Transcript|Zm00001d037465_T003|protein_coding||8/9||||||||||-1|||,T|intron_variant|MODIFIER||Zm00001d037465|Trans…	1/1	0/0	0/0	0/0	0/0	0/0	./.	0/0	0/0	0/0	0/0	0/0	0/0	0/0	0/0	0/0	0/0	0/0	0/0	./.	0/0	0/0	0/0	0/0	0/0	0/0	0/0	./.	./.	./.	0/0	0/0	0/0	./.	./.	0/0	0/0	0/0	0/0	0/0	0/0	0/0	0/0	0/0
6	126145780	SNP-6-126145780	T	A	AC=122;AF=0.824;AN=148;CSQ=A|intron_variant|MODIFIER||Zm00001d037465|Transcript|Zm00001d037465_T001|protein_coding||9/10||||||||||-1|||,A|intron_variant|MODIFIER||Zm00001d037465|Transcript|Zm00001d037465_T002|protein_coding||9/10||||||||||-1|||,A|intron_variant|MODIFIER||Zm00001d037465|Transcript|Zm00001d037465_T003|protein_coding||8/9||||||||||-1|||,A|intron_variant|MODIFIER||Zm00001d037465|Tran…	1/1	1/1	1/1	0/0	1/1	1/1	0/0	1/1	1/1	1/1	./.	1/1	1/1	1/1	1/1	./.	1/1	1/1	1/1	./.	0/0	1/1	1/1	0/0	0/0	0/0	1/1	1/1	./.	1/1	1/1	1/1	1/1	1/1	1/1	1/1	1/1	1/1	1/1	1/1	1/1	1/1	1/1	0/0
6	126145792	SNP-6-126145792	C	T	AC=122;AF=0.824;AN=148;CSQ=T|intron_variant|MODIFIER||Zm00001d037465|Transcript|Zm00001d037465_T001|protein_coding||9/10||||||||||-1|||,T|intron_variant|MODIFIER||Zm00001d037465|Transcript|Zm00001d037465_T002|protein_coding||9/10||||||||||-1|||,T|intron_variant|MODIFIER||Zm00001d037465|Transcript|Zm00001d037465_T003|protein_coding||8/9||||||||||-1|||,T|intron_variant|MODIFIER||Zm00001d037465|Tran…	1/1	1/1	1/1	0/0	1/1	1/1	0/0	1/1	1/1	1/1	./.	1/1	1/1	1/1	1/1	./.	1/1	1/1	1/1	./.	0/0	1/1	1/1	0/0	0/0	0/0	1/1	1/1	./.	1/1	1/1	1/1	1/1	1/1	1/1	1/1	1/1	1/1	1/1	1/1	1/1	1/1	1/1	0/0
6	126145801	SNP-6-126145801	C	T	AC=54;AF=0.351;AN=154;CSQ=T|intron_variant|MODIFIER||Zm00001d037465|Transcript|Zm00001d037465_T001|protein_coding||9/10||||||||||-1|||,T|intron_variant|MODIFIER||Zm00001d037465|Transcript|Zm00001d037465_T002|protein_coding||9/10||||||||||-1|||,T|intron_variant|MODIFIER||Zm00001d037465|Transcript|Zm00001d037465_T003|protein_coding||8/9||||||||||-1|||,T|intron_variant|MODIFIER||Zm00001d037465|Trans…	0/0	0/0	0/0	0/0	0/0	1/1	0/0	0/0	0/0	0/0	./.	1/1	1/1	0/0	0/0	0/0	1/1	0/0	1/1	./.	0/0	0/0	1/1	./.	0/0	0/0	0/0	0/0	0/0	0/0	1/1	1/1	0/0	0/0	1/1	1/1	1/1	1/1	0/0	1/1	1/1	0/0	0/0	0/0
6	126146036	SNP-6-126146036	A	C	AC=104;AF=0.658;AN=158;CSQ=C|intron_variant|MODIFIER||Zm00001d037465|Transcript|Zm00001d037465_T001|protein_coding||9/10||||||||||-1|||,C|intron_variant|MODIFIER||Zm00001d037465|Transcript|Zm00001d037465_T002|protein_coding||9/10||||||||||-1|||,C|intron_variant|MODIFIER||Zm00001d037465|Transcript|Zm00001d037465_T003|protein_coding||8/9||||||||||-1|||,C|intron_variant|MODIFIER||Zm00001d037465|Tran…	0/0	1/1	1/1	0/0	1/1	1/1	0/0	1/1	1/1	1/1	1/1	1/1	1/1	1/1	1/1	1/1	1/1	1/1	1/1	0/0	0/0	1/1	1/1	0/0	0/0	0/0	1/1	1/1	0/0	0/0	1/1	1/1	0/0	0/0	1/1	1/1	1/1	1/1	1/1	1/1	1/1	1/1	1/1	0/0
6	126146037	SNP-6-126146037	T	A	AC=132;AF=0.835;AN=158;CSQ=A|intron_variant|MODIFIER||Zm00001d037465|Transcript|Zm00001d037465_T001|protein_coding||9/10||||||||||-1|||,A|intron_variant|MODIFIER||Zm00001d037465|Transcript|Zm00001d037465_T002|protein_coding||9/10||||||||||-1|||,A|intron_variant|MODIFIER||Zm00001d037465|Transcript|Zm00001d037465_T003|protein_coding||8/9||||||||||-1|||,A|intron_variant|MODIFIER||Zm00001d037465|Tran…	1/1	1/1	1/1	0/0	1/1	1/1	0/0	1/1	1/1	1/1	1/1	1/1	1/1	1/1	1/1	1/1	1/1	1/1	1/1	1/1	0/0	1/1	1/1	0/0	0/0	0/0	1/1	1/1	1/1	1/1	1/1	1/1	1/1	1/1	1/1	1/1	1/1	1/1	1/1	1/1	1/1	1/1	1/1	0/0
6	126146068	SNP-6-126146068	C	T	AC=130;AF=0.844;AN=154;CSQ=T|intron_variant|MODIFIER||Zm00001d037465|Transcript|Zm00001d037465_T001|protein_coding||9/10||||||||||-1|||,T|intron_variant|MODIFIER||Zm00001d037465|Transcript|Zm00001d037465_T002|protein_coding||9/10||||||||||-1|||,T|intron_variant|MODIFIER||Zm00001d037465|Transcript|Zm00001d037465_T003|protein_coding||8/9||||||||||-1|||,T|intron_variant|MODIFIER||Zm00001d037465|Tran…	1/1	1/1	1/1	0/0	1/1	1/1	0/0	1/1	1/1	1/1	1/1	1/1	./.	1/1	1/1	1/1	1/1	1/1	1/1	1/1	0/0	1/1	1/1	0/0	0/0	0/0	1/1	1/1	1/1	1/1	1/1	1/1	1/1	1/1	1/1	1/1	1/1	1/1	1/1	1/1	1/1	1/1	1/1	./.
6	126146072	SNP-6-126146072	T	C	AC=28;AF=0.177;AN=158;CSQ=C|intron_variant|MODIFIER||Zm00001d037465|Transcript|Zm00001d037465_T001|protein_coding||9/10||||||||||-1|||,C|intron_variant|MODIFIER||Zm00001d037465|Transcript|Zm00001d037465_T002|protein_coding||9/10||||||||||-1|||,C|intron_variant|MODIFIER||Zm00001d037465|Transcript|Zm00001d037465_T003|protein_coding||8/9||||||||||-1|||,C|intron_variant|MODIFIER||Zm00001d037465|Trans…	0/0	1/1	1/1	0/0	1/1	0/0	0/0	1/1	1/1	1/1	0/0	0/0	0/0	0/0	1/1	1/1	0/0	0/0	0/0	0/0	0/0	1/1	0/0	0/0	0/0	0/0	0/0	1/1	0/0	0/0	0/0	0/0	0/0	0/0	0/0	0/0	0/0	0/0	0/0	0/0	0/0	1/1	0/0	./.
6	126146085	SNP-6-126146085	C	T	AC=104;AF=0.667;AN=156;CSQ=T|intron_variant|MODIFIER||Zm00001d037465|Transcript|Zm00001d037465_T001|protein_coding||9/10||||||||||-1|||,T|intron_variant|MODIFIER||Zm00001d037465|Transcript|Zm00001d037465_T002|protein_coding||9/10||||||||||-1|||,T|intron_variant|MODIFIER||Zm00001d037465|Transcript|Zm00001d037465_T003|protein_coding||8/9||||||||||-1|||,T|intron_variant|MODIFIER||Zm00001d037465|Tran…	0/0	1/1	1/1	0/0	1/1	1/1	0/0	1/1	1/1	1/1	1/1	1/1	./.	1/1	1/1	1/1	1/1	1/1	1/1	0/0	0/0	1/1	1/1	0/0	0/0	0/0	1/1	1/1	0/0	0/0	1/1	1/1	0/0	0/0	1/1	1/1	1/1	1/1	1/1	1/1	1/1	1/1	1/1	./.
6	126146250	DEL-6-126146250	AAAG	A	AC=102;AF=0.646;AN=158;CSQ=-|intron_variant|MODIFIER||Zm00001d037465|Transcript|Zm00001d037465_T001|protein_coding||8/10||||||||||-1|||,-|intron_variant|MODIFIER||Zm00001d037465|Transcript|Zm00001d037465_T002|protein_coding||8/10||||||||||-1|||,-|intron_variant|MODIFIER||Zm00001d037465|Transcript|Zm00001d037465_T003|protein_coding||7/9||||||||||-1|||,-|intron_variant|MODIFIER||Zm00001d037465|Tran…	0/0	1/1	1/1	0/0	1/1	1/1	0/0	1/1	1/1	1/1	1/1	1/1	1/1	1/1	1/1	1/1	1/1	1/1	1/1	0/0	0/0	1/1	1/1	0/0	0/0	0/0	1/1	1/1	0/0	0/0	1/1	1/1	0/0	0/0	1/1	1/1	1/1	1/1	1/1	1/1	1/1	1/1	1/1	0/0
6	126146445	DEL-6-126146445	GT	G	AC=124;AF=0.827;AN=150;CSQ=-|intron_variant|MODIFIER||Zm00001d037465|Transcript|Zm00001d037465_T001|protein_coding||7/10||||||||||-1|||,-|intron_variant|MODIFIER||Zm00001d037465|Transcript|Zm00001d037465_T002|protein_coding||7/10||||||||||-1|||,-|intron_variant|MODIFIER||Zm00001d037465|Transcript|Zm00001d037465_T003|protein_coding||6/9||||||||||-1|||,-|intron_variant|MODIFIER||Zm00001d037465|Tran…	1/1	1/1	./.	0/0	1/1	1/1	0/0	1/1	./.	1/1	1/1	1/1	1/1	1/1	1/1	1/1	1/1	1/1	1/1	1/1	0/0	./.	1/1	0/0	0/0	0/0	1/1	1/1	1/1	1/1	1/1	1/1	1/1	1/1	1/1	1/1	1/1	1/1	1/1	1/1	1/1	1/1	1/1	0/0
6	126146480	INS-6-126146480	G	GA	AC=132;AF=0.846;AN=156;CSQ=A|intron_variant|MODIFIER||Zm00001d037465|Transcript|Zm00001d037465_T001|protein_coding||7/10||||||||||-1|||,A|intron_variant|MODIFIER||Zm00001d037465|Transcript|Zm00001d037465_T002|protein_coding||7/10||||||||||-1|||,A|intron_variant|MODIFIER||Zm00001d037465|Transcript|Zm00001d037465_T003|protein_coding||6/9||||||||||-1|||,A|intron_variant|MODIFIER||Zm00001d037465|Tran…	1/1	1/1	1/1	0/0	1/1	1/1	0/0	1/1	1/1	1/1	1/1	./.	1/1	1/1	1/1	1/1	1/1	1/1	1/1	1/1	0/0	1/1	1/1	0/0	0/0	0/0	1/1	1/1	1/1	1/1	1/1	1/1	1/1	1/1	1/1	1/1	1/1	1/1	1/1	1/1	1/1	1/1	1/1	0/0
6	126146741	SNP-6-126146741	C	T	AC=132;AF=0.835;AN=158;CSQ=T|missense_variant&splice_region_variant|MODERATE||Zm00001d037465|Transcript|Zm00001d037465_T001|protein_coding|7/11||||2589|2335|779|A/T|Gca/Aca|||-1|||,T|missense_variant&splice_region_variant|MODERATE||Zm00001d037465|Transcript|Zm00001d037465_T002|protein_coding|7/11||||3190|2329|777|A/T|Gca/Aca|||-1|||,T|missense_variant&splice_region_variant|MODERATE||Zm00001d03746…	1/1	1/1	1/1	0/0	1/1	1/1	0/0	1/1	1/1	1/1	1/1	1/1	1/1	1/1	1/1	1/1	1/1	1/1	1/1	1/1	0/0	1/1	1/1	0/0	0/0	0/0	1/1	1/1	1/1	1/1	1/1	1/1	1/1	1/1	1/1	1/1	1/1	1/1	1/1	1/1	1/1	./.	1/1	0/0
6	126146837	SNP-6-126146837	G	A	AC=128;AF=0.831;AN=154;CSQ=A|intron_variant|MODIFIER||Zm00001d037465|Transcript|Zm00001d037465_T001|protein_coding||6/10||||||||||-1|||,A|intron_variant|MODIFIER||Zm00001d037465|Transcript|Zm00001d037465_T002|protein_coding||6/10||||||||||-1|||,A|intron_variant|MODIFIER||Zm00001d037465|Transcript|Zm00001d037465_T003|protein_coding||5/9||||||||||-1|||,A|intron_variant|MODIFIER||Zm00001d037465|Tran…	1/1	1/1	1/1	0/0	1/1	1/1	0/0	1/1	1/1	1/1	1/1	1/1	1/1	1/1	1/1	1/1	1/1	1/1	1/1	1/1	0/0	1/1	1/1	0/0	0/0	0/0	1/1	1/1	1/1	1/1	1/1	1/1	./.	1/1	1/1	1/1	1/1	1/1	1/1	1/1	./.	1/1	1/1	0/0
6	126146866	SNP-6-126146866	A	G	AC=98;AF=0.628;AN=156;BaseQRankSum=1.07;CSQ=G|intron_variant|MODIFIER||Zm00001d037465|Transcript|Zm00001d037465_T001|protein_coding||6/10||||||||||-1|||,G|intron_variant|MODIFIER||Zm00001d037465|Transcript|Zm00001d037465_T002|protein_coding||6/10||||||||||-1|||,G|intron_variant|MODIFIER||Zm00001d037465|Transcript|Zm00001d037465_T003|protein_coding||5/9||||||||||-1|||,G|intron_variant|MODIFIER||Zm…	0/0	1/1	1/1	0/0	1/1	1/1	0/0	1/1	1/1	0/1	1/1	1/1	1/1	1/1	1/1	1/1	0/1	1/1	1/1	0/0	0/0	1/1	1/1	0/0	0/0	0/0	1/1	1/1	0/0	0/0	1/1	1/1	0/0	0/0	1/1	1/1	1/1	1/1	1/1	1/1	./.	./.	0/1	0/0
6	126146903	SNP-6-126146903	T	G	AC=21;AF=0.131;AN=160;BaseQRankSum=0.611;CSQ=G|intron_variant|MODIFIER||Zm00001d037465|Transcript|Zm00001d037465_T001|protein_coding||6/10||||||||||-1|||,G|intron_variant|MODIFIER||Zm00001d037465|Transcript|Zm00001d037465_T002|protein_coding||6/10||||||||||-1|||,G|intron_variant|MODIFIER||Zm00001d037465|Transcript|Zm00001d037465_T003|protein_coding||5/9||||||||||-1|||,G|intron_variant|MODIFIER||Z…	1/1	0/0	0/0	0/0	0/0	0/0	0/0	0/0	0/0	0/1	0/0	0/0	0/0	0/0	0/0	0/0	0/0	0/0	0/0	0/0	0/0	0/0	0/0	0/0	0/0	0/0	0/0	0/0	1/1	0/0	0/0	0/0	0/0	0/0	0/0	0/0	0/0	0/0	0/0	0/0	0/0	0/0	0/0	0/0
6	126146932	SNP-6-126146932	A	C	AC=19;AF=0.122;AN=156;BaseQRankSum=0.398;CSQ=C|intron_variant|MODIFIER||Zm00001d037465|Transcript|Zm00001d037465_T001|protein_coding||6/10||||||||||-1|||,C|intron_variant|MODIFIER||Zm00001d037465|Transcript|Zm00001d037465_T002|protein_coding||6/10||||||||||-1|||,C|intron_variant|MODIFIER||Zm00001d037465|Transcript|Zm00001d037465_T003|protein_coding||5/9||||||||||-1|||,C|intron_variant|MODIFIER||Z…	1/1	0/0	0/0	0/0	0/0	0/0	0/0	0/0	0/0	0/1	0/0	0/0	0/0	0/0	0/0	0/0	0/0	0/0	0/0	0/0	0/0	0/0	0/0	0/0	0/0	0/0	0/0	0/0	1/1	0/0	0/0	0/0	0/0	0/0	0/0	0/0	0/0	0/0	0/0	0/0	0/0	0/0	0/0	0/0
6	126146967	SNP-6-126146967	A	G	AC=25;AF=0.16;AN=156;BaseQRankSum=2.2;CSQ=G|intron_variant|MODIFIER||Zm00001d037465|Transcript|Zm00001d037465_T001|protein_coding||6/10||||||||||-1|||,G|intron_variant|MODIFIER||Zm00001d037465|Transcript|Zm00001d037465_T002|protein_coding||6/10||||||||||-1|||,G|intron_variant|MODIFIER||Zm00001d037465|Transcript|Zm00001d037465_T003|protein_coding||5/9||||||||||-1|||,G|intron_variant|MODIFIER||Zm00…	1/1	0/0	0/0	0/0	0/0	0/0	0/0	0/0	0/0	0/1	0/0	0/0	0/0	0/0	0/0	0/0	0/0	0/0	0/0	./.	0/0	0/0	0/0	0/0	0/0	0/0	0/0	0/0	1/1	1/1	0/0	0/0	1/1	1/1	0/0	0/0	0/0	0/0	0/0	0/0	0/0	0/0	0/0	0/0
6	126146969	SNP-6-126146969	G	A	AC=100;AF=0.658;AN=152;BaseQRankSum=-1.645;CSQ=A|intron_variant|MODIFIER||Zm00001d037465|Transcript|Zm00001d037465_T001|protein_coding||6/10||||||||||-1|||,A|intron_variant|MODIFIER||Zm00001d037465|Transcript|Zm00001d037465_T002|protein_coding||6/10||||||||||-1|||,A|intron_variant|MODIFIER||Zm00001d037465|Transcript|Zm00001d037465_T003|protein_coding||5/9||||||||||-1|||,A|intron_variant|MODIFIER|…	0/0	1/1	1/1	0/0	1/1	1/1	0/0	1/1	1/1	0/1	1/1	1/1	1/1	1/1	1/1	1/1	1/1	1/1	1/1	./.	0/0	1/1	1/1	0/0	0/0	0/0	1/1	1/1	0/0	0/0	1/1	1/1	0/0	0/0	1/1	1/1	1/1	1/1	1/1	1/1	1/1	./.	1/1	0/0
6	126146988	SNP-6-126146988	C	T	AC=27;AF=0.171;AN=158;BaseQRankSum=-1.465;CSQ=T|intron_variant|MODIFIER||Zm00001d037465|Transcript|Zm00001d037465_T001|protein_coding||6/10||||||||||-1|||,T|intron_variant|MODIFIER||Zm00001d037465|Transcript|Zm00001d037465_T002|protein_coding||6/10||||||||||-1|||,T|intron_variant|MODIFIER||Zm00001d037465|Transcript|Zm00001d037465_T003|protein_coding||5/9||||||||||-1|||,T|intron_variant|MODIFIER||…	1/1	0/0	0/0	0/0	0/0	0/0	0/0	0/0	0/0	0/1	0/0	0/0	0/0	0/0	0/0	0/0	0/0	0/0	0/0	1/1	0/0	0/0	0/0	0/0	0/0	0/0	0/0	0/0	1/1	1/1	0/0	0/0	1/1	1/1	0/0	0/0	0/0	0/0	0/0	0/0	0/0	0/0	0/0	0/0
6	126147043	SNP-6-126147043	G	A	AC=124;AF=0.838;AN=148;CSQ=A|missense_variant|MODERATE||Zm00001d037465|Transcript|Zm00001d037465_T001|protein_coding|6/11||||2575|2321|774|P/L|cCa/cTa|||-1|||,A|missense_variant|MODERATE||Zm00001d037465|Transcript|Zm00001d037465_T002|protein_coding|6/11||||3176|2315|772|P/L|cCa/cTa|||-1|||,A|missense_variant|MODERATE||Zm00001d037465|Transcript|Zm00001d037465_T003|protein_coding|5/10||||3278|2417|…	1/1	1/1	1/1	./.	1/1	1/1	0/0	1/1	1/1	1/1	1/1	1/1	1/1	1/1	1/1	1/1	1/1	1/1	1/1	1/1	0/0	1/1	./.	0/0	0/0	0/0	1/1	1/1	1/1	1/1	1/1	1/1	1/1	1/1	1/1	1/1	1/1	1/1	1/1	1/1	1/1	./.	1/1	0/0
6	126147051	SNP-6-126147051	A	G	AC=8;AF=0.051;AN=158;CSQ=G|synonymous_variant|LOW||Zm00001d037465|Transcript|Zm00001d037465_T001|protein_coding|6/11||||2567|2313|771|G|ggT/ggC|||-1|||,G|synonymous_variant|LOW||Zm00001d037465|Transcript|Zm00001d037465_T002|protein_coding|6/11||||3168|2307|769|G|ggT/ggC|||-1|||,G|synonymous_variant|LOW||Zm00001d037465|Transcript|Zm00001d037465_T003|protein_coding|5/10||||3270|2409|803|G|ggT/ggC||…	0/0	0/0	0/0	./.	0/0	0/0	0/0	0/0	0/0	0/0	0/0	0/0	0/0	0/0	0/0	0/0	0/0	0/0	0/0	1/1	0/0	0/0	0/0	0/0	0/0	0/0	0/0	0/0	0/0	1/1	0/0	0/0	1/1	1/1	0/0	0/0	0/0	0/0	0/0	0/0	0/0	0/0	0/0	0/0
6	126147111	SNP-6-126147111	G	C	AC=27;AF=0.173;AN=156;BaseQRankSum=0.887;CSQ=C|synonymous_variant|LOW||Zm00001d037465|Transcript|Zm00001d037465_T001|protein_coding|6/11||||2507|2253|751|G|ggC/ggG|||-1|||,C|synonymous_variant|LOW||Zm00001d037465|Transcript|Zm00001d037465_T002|protein_coding|6/11||||3108|2247|749|G|ggC/ggG|||-1|||,C|synonymous_variant|LOW||Zm00001d037465|Transcript|Zm00001d037465_T003|protein_coding|5/10||||3210|…	1/1	0/0	0/0	0/0	0/0	0/0	0/0	0/0	0/0	0/1	0/0	0/0	0/0	0/0	0/0	0/0	0/0	0/0	0/0	1/1	0/0	0/0	0/0	0/0	0/0	0/0	0/0	0/0	1/1	1/1	0/0	0/0	./.	1/1	0/0	0/0	0/0	0/0	0/0	0/0	0/0	0/0	0/0	0/0
6	126147189	INS-6-126147189	C	CA	AC=17;AF=0.109;AN=156;BaseQRankSum=-0.431;CSQ=A|intron_variant|MODIFIER||Zm00001d037465|Transcript|Zm00001d037465_T001|protein_coding||5/10||||||||||-1|||,A|intron_variant|MODIFIER||Zm00001d037465|Transcript|Zm00001d037465_T002|protein_coding||5/10||||||||||-1|||,A|intron_variant|MODIFIER||Zm00001d037465|Transcript|Zm00001d037465_T003|protein_coding||4/9||||||||||-1|||,A|intron_variant|MODIFIER||…	1/1	0/0	0/0	0/0	0/0	0/0	0/0	0/0	0/0	0/1	0/0	0/0	0/0	0/0	0/0	0/0	0/0	0/0	0/0	0/0	0/0	0/0	0/0	0/0	0/0	0/0	0/0	0/0	1/1	0/0	0/0	0/0	0/0	0/0	0/0	0/0	0/0	0/0	0/0	0/0	0/0	0/0	0/0	0/0
6	126147201	SNP-6-126147201	A	C	AC=102;AF=0.646;AN=158;BaseQRankSum=2.37;CSQ=C|intron_variant|MODIFIER||Zm00001d037465|Transcript|Zm00001d037465_T001|protein_coding||5/10||||||||||-1|||,C|intron_variant|MODIFIER||Zm00001d037465|Transcript|Zm00001d037465_T002|protein_coding||5/10||||||||||-1|||,C|intron_variant|MODIFIER||Zm00001d037465|Transcript|Zm00001d037465_T003|protein_coding||4/9||||||||||-1|||,C|intron_variant|MODIFIER||Z…	0/0	1/1	./.	0/0	1/1	1/1	0/0	0/1	1/1	0/1	1/1	1/1	1/1	1/1	1/1	1/1	1/1	1/1	1/1	0/0	0/0	1/1	1/1	0/0	0/0	0/0	1/1	1/1	0/0	0/0	1/1	1/1	0/0	0/0	1/1	1/1	1/1	1/1	1/1	1/1	1/1	1/1	1/1	0/0
6	126147224	SNP-6-126147224	A	T	AC=126;AF=0.829;AN=152;CSQ=T|splice_donor_region_variant&intron_variant|LOW||Zm00001d037465|Transcript|Zm00001d037465_T001|protein_coding||5/10||||||||||-1|||,T|splice_donor_region_variant&intron_variant|LOW||Zm00001d037465|Transcript|Zm00001d037465_T002|protein_coding||5/10||||||||||-1|||,T|splice_donor_region_variant&intron_variant|LOW||Zm00001d037465|Transcript|Zm00001d037465_T003|protein_codi…	1/1	1/1	./.	0/0	1/1	1/1	0/0	1/1	1/1	1/1	1/1	1/1	1/1	1/1	1/1	1/1	1/1	1/1	1/1	1/1	0/0	1/1	./.	0/0	0/0	0/0	1/1	./.	1/1	1/1	1/1	1/1	1/1	1/1	1/1	1/1	1/1	1/1	1/1	1/1	1/1	1/1	1/1	0/0
6	126147425	SNP-6-126147425	A	G	AC=129;AF=0.827;AN=156;BaseQRankSum=1.28;CSQ=G|synonymous_variant|LOW||Zm00001d037465|Transcript|Zm00001d037465_T001|protein_coding|4/11||||2381|2127|709|L|ctT/ctC|||-1|||,G|synonymous_variant|LOW||Zm00001d037465|Transcript|Zm00001d037465_T002|protein_coding|4/11||||2982|2121|707|L|ctT/ctC|||-1|||,G|synonymous_variant|LOW||Zm00001d037465|Transcript|Zm00001d037465_T003|protein_coding|3/10||||3084|…	1/1	1/1	1/1	0/0	1/1	1/1	0/0	1/1	1/1	1/1	1/1	1/1	1/1	1/1	0/1	1/1	1/1	1/1	1/1	1/1	0/0	1/1	1/1	0/0	0/0	0/0	1/1	./.	1/1	1/1	1/1	1/1	1/1	1/1	1/1	1/1	1/1	1/1	1/1	1/1	1/1	1/1	1/1	0/0
6	126147666	SNP-6-126147666	A	T	AC=127;AF=0.836;AN=152;BaseQRankSum=0.431;CSQ=T|missense_variant|MODERATE||Zm00001d037465|Transcript|Zm00001d037465_T001|protein_coding|4/11||||2140|1886|629|I/N|aTt/aAt|||-1|||,T|missense_variant|MODERATE||Zm00001d037465|Transcript|Zm00001d037465_T002|protein_coding|4/11||||2741|1880|627|I/N|aTt/aAt|||-1|||,T|missense_variant|MODERATE||Zm00001d037465|Transcript|Zm00001d037465_T003|protein_coding…	1/1	1/1	./.	0/0	1/1	1/1	0/0	1/1	1/1	1/1	1/1	1/1	1/1	1/1	0/1	1/1	1/1	1/1	1/1	1/1	0/0	1/1	1/1	0/0	0/0	0/0	1/1	./.	1/1	1/1	1/1	1/1	1/1	1/1	1/1	1/1	1/1	1/1	1/1	1/1	1/1	1/1	1/1	0/0
6	126147911	SNP-6-126147911	C	G	AC=132;AF=0.835;AN=158;CSQ=G|missense_variant&splice_region_variant|MODERATE||Zm00001d037465|Transcript|Zm00001d037465_T001|protein_coding|3/11||||1997|1743|581|R/S|agG/agC|||-1|||,G|splice_region_variant&splice_polypyrimidine_tract_variant&intron_variant|LOW||Zm00001d037465|Transcript|Zm00001d037465_T002|protein_coding||2/10||||||||||-1|||,G|splice_region_variant&splice_polypyrimidine_tract_vari…	1/1	1/1	1/1	0/0	1/1	1/1	0/0	1/1	1/1	1/1	1/1	1/1	1/1	1/1	1/1	1/1	1/1	1/1	1/1	1/1	0/0	1/1	1/1	0/0	0/0	0/0	1/1	1/1	1/1	1/1	1/1	1/1	1/1	1/1	1/1	1/1	1/1	1/1	1/1	1/1	./.	1/1	1/1	0/0
6	126147930	SNP-6-126147930	A	G	AC=130;AF=0.833;AN=156;CSQ=G|intron_variant|MODIFIER||Zm00001d037465|Transcript|Zm00001d037465_T001|protein_coding||2/10||||||||||-1|||,G|intron_variant|MODIFIER||Zm00001d037465|Transcript|Zm00001d037465_T002|protein_coding||2/10||||||||||-1|||,G|intron_variant|MODIFIER||Zm00001d037465|Transcript|Zm00001d037465_T003|protein_coding||2/9||||||||||-1|||,G|intron_variant|MODIFIER||Zm00001d037465|Tran…	1/1	1/1	./.	0/0	1/1	1/1	0/0	1/1	1/1	1/1	1/1	1/1	1/1	1/1	1/1	1/1	1/1	1/1	1/1	1/1	0/0	1/1	1/1	0/0	0/0	0/0	1/1	1/1	1/1	1/1	1/1	1/1	1/1	1/1	1/1	1/1	1/1	1/1	1/1	1/1	./.	1/1	1/1	0/0
6	126148235	SNP-6-126148235	T	G	AC=128;AF=0.821;AN=156;CSQ=G|missense_variant|MODERATE||Zm00001d037465|Transcript|Zm00001d037465_T001|protein_coding|2/11||||1760|1506|502|K/N|aaA/aaC|||-1|||,G|missense_variant|MODERATE||Zm00001d037465|Transcript|Zm00001d037465_T002|protein_coding|2/11||||2367|1506|502|K/N|aaA/aaC|||-1|||,G|missense_variant|MODERATE||Zm00001d037465|Transcript|Zm00001d037465_T003|protein_coding|2/10||||2367|1506|…	1/1	1/1	./.	0/0	1/1	1/1	0/0	1/1	1/1	1/1	1/1	1/1	1/1	1/1	1/1	1/1	1/1	1/1	1/1	1/1	0/0	1/1	1/1	0/0	0/0	0/0	1/1	1/1	1/1	1/1	1/1	1/1	1/1	1/1	1/1	1/1	1/1	1/1	1/1	1/1	1/1	1/1	1/1	0/0
6	126148238	SNP-6-126148238	C	T	AC=128;AF=0.831;AN=154;CSQ=T|synonymous_variant|LOW||Zm00001d037465|Transcript|Zm00001d037465_T001|protein_coding|2/11||||1757|1503|501|G|ggG/ggA|||-1|||,T|synonymous_variant|LOW||Zm00001d037465|Transcript|Zm00001d037465_T002|protein_coding|2/11||||2364|1503|501|G|ggG/ggA|||-1|||,T|synonymous_variant|LOW||Zm00001d037465|Transcript|Zm00001d037465_T003|protein_coding|2/10||||2364|1503|501|G|ggG/ggA…	1/1	1/1	./.	0/0	1/1	1/1	0/0	1/1	1/1	1/1	1/1	1/1	1/1	1/1	1/1	1/1	1/1	1/1	1/1	1/1	0/0	1/1	1/1	0/0	0/0	0/0	1/1	1/1	1/1	1/1	1/1	1/1	1/1	1/1	1/1	1/1	1/1	1/1	1/1	1/1	1/1	1/1	1/1	0/0
6	126148254	SNP-6-126148254	T	G	AC=128;AF=0.831;AN=154;CSQ=G|missense_variant|MODERATE||Zm00001d037465|Transcript|Zm00001d037465_T001|protein_coding|2/11||||1741|1487|496|Q/P|cAa/cCa|||-1|||,G|missense_variant|MODERATE||Zm00001d037465|Transcript|Zm00001d037465_T002|protein_coding|2/11||||2348|1487|496|Q/P|cAa/cCa|||-1|||,G|missense_variant|MODERATE||Zm00001d037465|Transcript|Zm00001d037465_T003|protein_coding|2/10||||2348|1487|…	1/1	1/1	./.	0/0	1/1	1/1	0/0	1/1	1/1	1/1	1/1	1/1	1/1	1/1	1/1	1/1	1/1	1/1	1/1	1/1	0/0	1/1	1/1	0/0	0/0	0/0	1/1	1/1	./.	1/1	1/1	1/1	1/1	1/1	1/1	1/1	1/1	1/1	1/1	1/1	1/1	1/1	1/1	0/0
6	126148283	SNP-6-126148283	G	A	AC=21;AF=0.131;AN=160;BaseQRankSum=-0.674;CSQ=A|synonymous_variant|LOW||Zm00001d037465|Transcript|Zm00001d037465_T001|protein_coding|2/11||||1712|1458|486|P|ccC/ccT|||-1|||,A|synonymous_variant|LOW||Zm00001d037465|Transcript|Zm00001d037465_T002|protein_coding|2/11||||2319|1458|486|P|ccC/ccT|||-1|||,A|synonymous_variant|LOW||Zm00001d037465|Transcript|Zm00001d037465_T003|protein_coding|2/10||||2319…	1/1	0/0	0/0	0/0	0/0	0/0	0/0	0/0	0/0	0/1	0/0	0/0	0/0	0/0	0/0	0/0	0/0	0/0	0/0	0/0	0/0	0/0	0/0	0/0	0/0	0/0	0/0	0/0	1/1	0/0	0/0	0/0	0/0	0/1	0/0	0/0	0/0	0/0	0/0	0/0	0/0	0/0	0/0	0/0
6	126148307	SNP-6-126148307	T	A	AC=128;AF=0.831;AN=154;CSQ=A|missense_variant|MODERATE||Zm00001d037465|Transcript|Zm00001d037465_T001|protein_coding|2/11||||1688|1434|478|K/N|aaA/aaT|||-1|||,A|missense_variant|MODERATE||Zm00001d037465|Transcript|Zm00001d037465_T002|protein_coding|2/11||||2295|1434|478|K/N|aaA/aaT|||-1|||,A|missense_variant|MODERATE||Zm00001d037465|Transcript|Zm00001d037465_T003|protein_coding|2/10||||2295|1434|…	1/1	1/1	./.	0/0	1/1	1/1	0/0	1/1	1/1	1/1	1/1	1/1	1/1	1/1	1/1	1/1	1/1	1/1	1/1	1/1	0/0	1/1	1/1	0/0	0/0	0/0	1/1	1/1	1/1	1/1	1/1	1/1	1/1	1/1	1/1	1/1	1/1	1/1	1/1	1/1	1/1	1/1	1/1	0/0
6	126148855	SNP-6-126148855	C	T	AC=132;AF=0.835;AN=158;CSQ=T|missense_variant|MODERATE||Zm00001d037465|Transcript|Zm00001d037465_T001|protein_coding|2/11||||1140|886|296|V/I|Gtt/Att|||-1|||,T|missense_variant|MODERATE||Zm00001d037465|Transcript|Zm00001d037465_T002|protein_coding|2/11||||1747|886|296|V/I|Gtt/Att|||-1|||,T|missense_variant|MODERATE||Zm00001d037465|Transcript|Zm00001d037465_T003|protein_coding|2/10||||1747|886|296…	1/1	1/1	1/1	0/0	1/1	1/1	0/0	1/1	1/1	1/1	1/1	1/1	1/1	1/1	1/1	1/1	1/1	1/1	1/1	1/1	0/0	1/1	1/1	0/0	0/0	0/0	1/1	1/1	1/1	1/1	1/1	1/1	1/1	1/1	1/1	1/1	1/1	1/1	1/1	1/1	1/1	1/1	1/1	0/0
6	126149092	SNP-6-126149092	T	A	AC=99;AF=0.635;AN=156;BaseQRankSum=0.967;CSQ=A|missense_variant|MODERATE||Zm00001d037465|Transcript|Zm00001d037465_T001|protein_coding|2/11||||903|649|217|I/L|Ata/Tta|||-1|||,A|missense_variant|MODERATE||Zm00001d037465|Transcript|Zm00001d037465_T002|protein_coding|2/11||||1510|649|217|I/L|Ata/Tta|||-1|||,A|missense_variant|MODERATE||Zm00001d037465|Transcript|Zm00001d037465_T003|protein_coding|2/1…	0/0	1/1	./.	0/0	1/1	1/1	0/0	0/1	1/1	0/1	1/1	1/1	1/1	1/1	1/1	1/1	1/1	1/1	1/1	0/0	0/0	1/1	1/1	0/0	0/0	0/0	1/1	1/1	0/0	0/0	1/1	1/1	0/0	0/0	1/1	1/1	1/1	1/1	./.	1/1	1/1	1/1	1/1	0/0
6	126149119	SNP-6-126149119	T	C	AC=132;AF=0.835;AN=158;CSQ=C|missense_variant|MODERATE||Zm00001d037465|Transcript|Zm00001d037465_T001|protein_coding|2/11||||876|622|208|K/E|Aag/Gag|||-1|||,C|missense_variant|MODERATE||Zm00001d037465|Transcript|Zm00001d037465_T002|protein_coding|2/11||||1483|622|208|K/E|Aag/Gag|||-1|||,C|missense_variant|MODERATE||Zm00001d037465|Transcript|Zm00001d037465_T003|protein_coding|2/10||||1483|622|208|…	1/1	1/1	1/1	0/0	1/1	1/1	0/0	1/1	1/1	1/1	1/1	1/1	1/1	1/1	1/1	1/1	1/1	1/1	1/1	1/1	0/0	1/1	1/1	0/0	0/0	0/0	1/1	1/1	1/1	1/1	1/1	1/1	1/1	1/1	1/1	1/1	1/1	1/1	1/1	1/1	1/1	1/1	1/1	0/0
6	126149323	SNP-6-126149323	T	A	AC=93;AF=0.612;AN=152;BaseQRankSum=0.319;CSQ=A|missense_variant|MODERATE||Zm00001d037465|Transcript|Zm00001d037465_T001|protein_coding|2/11||||672|418|140|I/L|Ata/Tta|||-1|||,A|missense_variant|MODERATE||Zm00001d037465|Transcript|Zm00001d037465_T002|protein_coding|2/11||||1279|418|140|I/L|Ata/Tta|||-1|||,A|missense_variant|MODERATE||Zm00001d037465|Transcript|Zm00001d037465_T003|protein_coding|2/1…	0/0	1/1	./.	0/0	1/1	1/1	0/0	0/1	1/1	0/1	1/1	./.	1/1	1/1	1/1	1/1	1/1	1/1	1/1	0/0	0/0	1/1	1/1	0/0	0/0	0/0	1/1	1/1	0/0	0/0	1/1	0/0	0/0	0/0	1/1	./.	1/1	1/1	./.	1/1	1/1	1/1	1/1	0/0
6	126149365	SNP-6-126149365	A	G	AC=126;AF=0.829;AN=152;CSQ=G|intron_variant|MODIFIER||Zm00001d037465|Transcript|Zm00001d037465_T001|protein_coding||1/10||||||||||-1|||,G|intron_variant|MODIFIER||Zm00001d037465|Transcript|Zm00001d037465_T002|protein_coding||1/10||||||||||-1|||,G|intron_variant|MODIFIER||Zm00001d037465|Transcript|Zm00001d037465_T003|protein_coding||1/9||||||||||-1|||,G|intron_variant|MODIFIER||Zm00001d037465|Tran…	1/1	1/1	./.	0/0	1/1	1/1	0/0	1/1	1/1	1/1	1/1	1/1	1/1	1/1	1/1	1/1	1/1	1/1	1/1	1/1	0/0	1/1	1/1	0/0	0/0	0/0	1/1	1/1	1/1	1/1	1/1	1/1	1/1	1/1	1/1	1/1	1/1	1/1	1/1	1/1	./.	1/1	1/1	0/0
6	126149404	DEL-6-126149404	TA	T	AC=126;AF=0.84;AN=150;CSQ=-|intron_variant|MODIFIER||Zm00001d037465|Transcript|Zm00001d037465_T001|protein_coding||1/10||||||||||-1|||,-|intron_variant|MODIFIER||Zm00001d037465|Transcript|Zm00001d037465_T002|protein_coding||1/10||||||||||-1|||,-|intron_variant|MODIFIER||Zm00001d037465|Transcript|Zm00001d037465_T003|protein_coding||1/9||||||||||-1|||,-|intron_variant|MODIFIER||Zm00001d037465|Trans…	1/1	1/1	1/1	0/0	1/1	1/1	0/0	1/1	1/1	1/1	1/1	1/1	1/1	1/1	1/1	./.	1/1	1/1	1/1	1/1	0/0	1/1	1/1	0/0	0/0	0/0	1/1	1/1	1/1	1/1	1/1	1/1	1/1	1/1	1/1	1/1	1/1	1/1	1/1	1/1	1/1	1/1	1/1	0/0
6	126149512	SNP-6-126149512	C	T	AC=18;AF=0.117;AN=154;CSQ=T|intron_variant|MODIFIER||Zm00001d037465|Transcript|Zm00001d037465_T001|protein_coding||1/10||||||||||-1|||,T|intron_variant|MODIFIER||Zm00001d037465|Transcript|Zm00001d037465_T002|protein_coding||1/10||||||||||-1|||,T|intron_variant|MODIFIER||Zm00001d037465|Transcript|Zm00001d037465_T003|protein_coding||1/9||||||||||-1|||,T|intron_variant|MODIFIER||Zm00001d037465|Trans…	0/0	0/0	0/0	0/0	0/0	0/0	0/0	0/0	0/0	0/0	0/0	0/0	0/0	1/1	0/0	0/0	0/0	1/1	0/0	0/0	0/0	0/0	0/0	0/0	0/0	0/0	1/1	0/0	0/0	0/0	0/0	0/0	0/0	0/0	0/0	0/0	0/0	0/0	./.	0/0	0/0	0/0	0/0	0/0
6	126149561	SNP-6-126149561	A	G	AC=124;AF=0.827;AN=150;CSQ=G|intron_variant|MODIFIER||Zm00001d037465|Transcript|Zm00001d037465_T001|protein_coding||1/10||||||||||-1|||,G|intron_variant|MODIFIER||Zm00001d037465|Transcript|Zm00001d037465_T002|protein_coding||1/10||||||||||-1|||,G|intron_variant|MODIFIER||Zm00001d037465|Transcript|Zm00001d037465_T003|protein_coding||1/9||||||||||-1|||,G|intron_variant|MODIFIER||Zm00001d037465|Tran…	1/1	1/1	1/1	0/0	1/1	1/1	0/0	1/1	1/1	1/1	./.	1/1	1/1	1/1	1/1	1/1	1/1	1/1	1/1	1/1	0/0	1/1	1/1	0/0	0/0	0/0	1/1	1/1	1/1	1/1	1/1	1/1	1/1	1/1	1/1	./.	1/1	1/1	./.	1/1	1/1	./.	1/1	0/0
6	126149608	SNP-6-126149608	A	C	AC=89;AF=0.618;AN=144;BaseQRankSum=-0.842;CSQ=C|intron_variant|MODIFIER||Zm00001d037465|Transcript|Zm00001d037465_T001|protein_coding||1/10||||||||||-1|||,C|intron_variant|MODIFIER||Zm00001d037465|Transcript|Zm00001d037465_T002|protein_coding||1/10||||||||||-1|||,C|intron_variant|MODIFIER||Zm00001d037465|Transcript|Zm00001d037465_T003|protein_coding||1/9||||||||||-1|||,C|intron_variant|MODIFIER||…	0/0	1/1	1/1	0/0	1/1	1/1	0/0	1/1	./.	0/1	./.	1/1	1/1	./.	1/1	1/1	1/1	1/1	1/1	0/0	0/0	1/1	1/1	0/0	0/0	0/0	1/1	1/1	0/0	0/0	1/1	1/1	0/0	0/0	1/1	./.	1/1	1/1	./.	1/1	1/1	./.	1/1	0/0
6	126149627	SNP-6-126149627	A	G	AC=110;AF=0.775;AN=142;CSQ=G|intron_variant|MODIFIER||Zm00001d037465|Transcript|Zm00001d037465_T001|protein_coding||1/10||||||||||-1|||,G|intron_variant|MODIFIER||Zm00001d037465|Transcript|Zm00001d037465_T002|protein_coding||1/10||||||||||-1|||,G|intron_variant|MODIFIER||Zm00001d037465|Transcript|Zm00001d037465_T003|protein_coding||1/9||||||||||-1|||,G|intron_variant|MODIFIER||Zm00001d037465|Tran…	1/1	1/1	1/1	0/0	1/1	1/1	0/0	1/1	./.	1/1	./.	1/1	1/1	./.	1/1	1/1	1/1	1/1	./.	0/0	0/0	1/1	1/1	0/0	0/0	0/0	1/1	1/1	1/1	0/0	1/1	1/1	0/0	./.	1/1	./.	1/1	1/1	./.	1/1	1/1	./.	1/1	0/0
6	126149641	DEL-6-126149641	CCTTGCCA	C	AC=86;AF=0.581;AN=148;BaseQRankSum=0;CSQ=-|intron_variant|MODIFIER||Zm00001d037465|Transcript|Zm00001d037465_T001|protein_coding||1/10||||||||||-1|||,-|intron_variant|MODIFIER||Zm00001d037465|Transcript|Zm00001d037465_T002|protein_coding||1/10||||||||||-1|||,-|intron_variant|MODIFIER||Zm00001d037465|Transcript|Zm00001d037465_T003|protein_coding||1/9||||||||||-1|||,-|intron_variant|MODIFIER||Zm000…	0/0	1/1	1/1	0/0	1/1	1/1	0/0	0/1	./.	0/1	0/0	1/1	1/1	./.	1/1	1/1	1/1	1/1	./.	0/0	0/0	1/1	1/1	0/0	0/0	0/0	1/1	1/1	0/0	0/0	1/1	1/1	0/0	0/0	1/1	0/0	1/1	1/1	0/0	1/1	1/1	./.	1/1	0/0
6	126149678	SNP-6-126149678	A	G	AC=128;AF=0.831;AN=154;CSQ=G|intron_variant|MODIFIER||Zm00001d037465|Transcript|Zm00001d037465_T001|protein_coding||1/10||||||||||-1|||,G|intron_variant|MODIFIER||Zm00001d037465|Transcript|Zm00001d037465_T002|protein_coding||1/10||||||||||-1|||,G|intron_variant|MODIFIER||Zm00001d037465|Transcript|Zm00001d037465_T003|protein_coding||1/9||||||||||-1|||,G|intron_variant|MODIFIER||Zm00001d037465|Tran…	1/1	1/1	1/1	0/0	1/1	1/1	0/0	1/1	1/1	1/1	1/1	1/1	1/1	1/1	1/1	1/1	1/1	1/1	1/1	1/1	0/0	1/1	1/1	0/0	0/0	0/0	1/1	1/1	1/1	1/1	1/1	./.	1/1	1/1	1/1	1/1	1/1	1/1	1/1	1/1	./.	1/1	1/1	0/0
6	126149725	SNP-6-126149725	C	T	AC=95;AF=0.66;AN=144;BaseQRankSum=0;CSQ=T|intron_variant|MODIFIER||Zm00001d037465|Transcript|Zm00001d037465_T001|protein_coding||1/10||||||||||-1|||,T|intron_variant|MODIFIER||Zm00001d037465|Transcript|Zm00001d037465_T002|protein_coding||1/10||||||||||-1|||,T|intron_variant|MODIFIER||Zm00001d037465|Transcript|Zm00001d037465_T003|protein_coding||1/9||||||||||-1|||,T|intron_variant|MODIFIER||Zm0000…	0/0	1/1	1/1	0/0	1/1	1/1	0/0	0/1	1/1	./.	1/1	1/1	1/1	1/1	1/1	1/1	1/1	1/1	1/1	0/0	0/0	1/1	./.	0/0	0/0	0/0	1/1	1/1	./.	0/0	1/1	./.	0/0	0/0	1/1	1/1	1/1	1/1	1/1	1/1	./.	1/1	1/1	0/0
6	126149777	SNP-6-126149777	C	T	AC=98;AF=0.731;AN=134;CSQ=T|intron_variant|MODIFIER||Zm00001d037465|Transcript|Zm00001d037465_T001|protein_coding||1/10||||||||||-1|||,T|intron_variant|MODIFIER||Zm00001d037465|Transcript|Zm00001d037465_T002|protein_coding||1/10||||||||||-1|||,T|intron_variant|MODIFIER||Zm00001d037465|Transcript|Zm00001d037465_T003|protein_coding||1/9||||||||||-1|||,T|intron_variant|MODIFIER||Zm00001d037465|Trans…	./.	1/1	1/1	0/0	1/1	1/1	0/0	1/1	1/1	./.	1/1	1/1	1/1	1/1	1/1	1/1	1/1	1/1	1/1	./.	0/0	1/1	1/1	0/0	0/0	0/0	1/1	1/1	0/0	./.	1/1	./.	./.	./.	1/1	1/1	1/1	1/1	1/1	1/1	1/1	1/1	1/1	0/0
6	126149785	SNP-6-126149785	C	T	AC=98;AF=0.731;AN=134;CSQ=T|intron_variant|MODIFIER||Zm00001d037465|Transcript|Zm00001d037465_T001|protein_coding||1/10||||||||||-1|||,T|intron_variant|MODIFIER||Zm00001d037465|Transcript|Zm00001d037465_T002|protein_coding||1/10||||||||||-1|||,T|intron_variant|MODIFIER||Zm00001d037465|Transcript|Zm00001d037465_T003|protein_coding||1/9||||||||||-1|||,T|intron_variant|MODIFIER||Zm00001d037465|Trans…	./.	1/1	1/1	0/0	1/1	1/1	0/0	1/1	1/1	./.	1/1	1/1	1/1	1/1	1/1	1/1	1/1	1/1	1/1	./.	0/0	1/1	1/1	0/0	0/0	0/0	1/1	1/1	0/0	./.	1/1	./.	./.	./.	1/1	1/1	1/1	1/1	1/1	1/1	1/1	1/1	1/1	0/0
6	126149791	SNP-6-126149791	C	T	AC=106;AF=0.803;AN=132;CSQ=T|intron_variant|MODIFIER||Zm00001d037465|Transcript|Zm00001d037465_T001|protein_coding||1/10||||||||||-1|||,T|intron_variant|MODIFIER||Zm00001d037465|Transcript|Zm00001d037465_T002|protein_coding||1/10||||||||||-1|||,T|intron_variant|MODIFIER||Zm00001d037465|Transcript|Zm00001d037465_T003|protein_coding||1/9||||||||||-1|||,T|intron_variant|MODIFIER||Zm00001d037465|Tran…	./.	1/1	1/1	0/0	1/1	1/1	0/0	1/1	1/1	./.	1/1	1/1	1/1	1/1	1/1	1/1	1/1	1/1	1/1	1/1	0/0	1/1	1/1	0/0	0/0	0/0	1/1	1/1	./.	./.	1/1	./.	./.	./.	1/1	1/1	1/1	1/1	1/1	1/1	1/1	1/1	1/1	0/0
6	126149858	SNP-6-126149858	G	A	AC=120;AF=0.822;AN=146;CSQ=A|intron_variant|MODIFIER||Zm00001d037465|Transcript|Zm00001d037465_T001|protein_coding||1/10||||||||||-1|||,A|intron_variant|MODIFIER||Zm00001d037465|Transcript|Zm00001d037465_T002|protein_coding||1/10||||||||||-1|||,A|intron_variant|MODIFIER||Zm00001d037465|Transcript|Zm00001d037465_T003|protein_coding||1/9||||||||||-1|||,A|intron_variant|MODIFIER||Zm00001d037465|Tran…	./.	1/1	1/1	0/0	1/1	1/1	0/0	1/1	1/1	./.	1/1	1/1	1/1	1/1	1/1	1/1	1/1	1/1	1/1	1/1	0/0	1/1	1/1	0/0	0/0	0/0	1/1	1/1	1/1	./.	1/1	1/1	1/1	./.	1/1	1/1	1/1	1/1	1/1	1/1	1/1	1/1	1/1	0/0
6	126149871	SNP-6-126149871	G	A	AC=122;AF=0.836;AN=146;CSQ=A|intron_variant|MODIFIER||Zm00001d037465|Transcript|Zm00001d037465_T001|protein_coding||1/10||||||||||-1|||,A|intron_variant|MODIFIER||Zm00001d037465|Transcript|Zm00001d037465_T002|protein_coding||1/10||||||||||-1|||,A|intron_variant|MODIFIER||Zm00001d037465|Transcript|Zm00001d037465_T003|protein_coding||1/9||||||||||-1|||,A|intron_variant|MODIFIER||Zm00001d037465|Tran…	./.	1/1	1/1	0/0	1/1	1/1	0/0	1/1	1/1	./.	1/1	1/1	1/1	1/1	1/1	1/1	1/1	1/1	1/1	1/1	0/0	1/1	1/1	0/0	0/0	0/0	1/1	1/1	1/1	./.	1/1	1/1	1/1	./.	1/1	1/1	1/1	1/1	1/1	1/1	1/1	1/1	1/1	0/0
6	126149927	SNP-6-126149927	A	G	AC=94;AF=0.644;AN=146;CSQ=G|intron_variant|MODIFIER||Zm00001d037465|Transcript|Zm00001d037465_T001|protein_coding||1/10||||||||||-1|||,G|intron_variant|MODIFIER||Zm00001d037465|Transcript|Zm00001d037465_T002|protein_coding||1/10||||||||||-1|||,G|intron_variant|MODIFIER||Zm00001d037465|Transcript|Zm00001d037465_T003|protein_coding||1/9||||||||||-1|||,G|intron_variant|MODIFIER||Zm00001d037465|Trans…	./.	1/1	./.	0/0	1/1	1/1	0/0	1/1	1/1	0/0	1/1	1/1	./.	1/1	1/1	1/1	./.	1/1	1/1	0/0	0/0	1/1	1/1	0/0	0/0	0/0	1/1	1/1	0/0	0/0	1/1	1/1	0/0	0/0	1/1	1/1	1/1	1/1	./.	1/1	1/1	1/1	1/1	0/0
6	126149934	SNP-6-126149934	A	G	AC=116;AF=0.817;AN=142;CSQ=G|intron_variant|MODIFIER||Zm00001d037465|Transcript|Zm00001d037465_T001|protein_coding||1/10||||||||||-1|||,G|intron_variant|MODIFIER||Zm00001d037465|Transcript|Zm00001d037465_T002|protein_coding||1/10||||||||||-1|||,G|intron_variant|MODIFIER||Zm00001d037465|Transcript|Zm00001d037465_T003|protein_coding||1/9||||||||||-1|||,G|intron_variant|MODIFIER||Zm00001d037465|Tran…	./.	1/1	./.	0/0	1/1	1/1	0/0	1/1	1/1	1/1	1/1	1/1	./.	1/1	1/1	1/1	./.	1/1	1/1	./.	0/0	1/1	1/1	0/0	0/0	0/0	1/1	1/1	1/1	1/1	1/1	1/1	1/1	./.	1/1	1/1	1/1	1/1	./.	1/1	1/1	1/1	1/1	0/0
6	126149941	SNP-6-126149941	T	A	AC=116;AF=0.817;AN=142;CSQ=A|intron_variant|MODIFIER||Zm00001d037465|Transcript|Zm00001d037465_T001|protein_coding||1/10||||||||||-1|||,A|intron_variant|MODIFIER||Zm00001d037465|Transcript|Zm00001d037465_T002|protein_coding||1/10||||||||||-1|||,A|intron_variant|MODIFIER||Zm00001d037465|Transcript|Zm00001d037465_T003|protein_coding||1/9||||||||||-1|||,A|intron_variant|MODIFIER||Zm00001d037465|Tran…	./.	1/1	./.	0/0	1/1	1/1	0/0	1/1	1/1	1/1	1/1	1/1	./.	1/1	1/1	1/1	./.	1/1	1/1	./.	0/0	1/1	1/1	0/0	0/0	0/0	1/1	1/1	1/1	1/1	1/1	1/1	1/1	./.	1/1	1/1	1/1	1/1	./.	1/1	1/1	1/1	1/1	0/0
6	126149950	SNP-6-126149950	C	T	AC=20;AF=0.128;AN=156;CSQ=T|intron_variant|MODIFIER||Zm00001d037465|Transcript|Zm00001d037465_T001|protein_coding||1/10||||||||||-1|||,T|intron_variant|MODIFIER||Zm00001d037465|Transcript|Zm00001d037465_T002|protein_coding||1/10||||||||||-1|||,T|intron_variant|MODIFIER||Zm00001d037465|Transcript|Zm00001d037465_T003|protein_coding||1/9||||||||||-1|||,T|intron_variant|MODIFIER||Zm00001d037465|Trans…	./.	0/0	0/0	0/0	0/0	0/0	0/0	0/0	0/0	1/1	0/0	0/0	0/0	0/0	0/0	0/0	./.	0/0	0/0	0/0	0/0	0/0	0/0	0/0	0/0	0/0	0/0	0/0	1/1	0/0	0/0	0/0	0/0	0/0	0/0	0/0	0/0	0/0	0/0	0/0	0/0	0/0	0/0	0/0
6	126149999	SNP-6-126149999	A	C	AC=26;AF=0.167;AN=156;CSQ=C|intron_variant|MODIFIER||Zm00001d037465|Transcript|Zm00001d037465_T001|protein_coding||1/10||||||||||-1|||,C|intron_variant|MODIFIER||Zm00001d037465|Transcript|Zm00001d037465_T002|protein_coding||1/10||||||||||-1|||,C|intron_variant|MODIFIER||Zm00001d037465|Transcript|Zm00001d037465_T003|protein_coding||1/9||||||||||-1|||,C|intron_variant|MODIFIER||Zm00001d037465|Trans…	./.	0/0	0/0	0/0	0/0	0/0	0/0	0/0	0/0	1/1	0/0	0/0	0/0	0/0	0/0	0/0	0/0	0/0	0/0	./.	0/0	0/0	0/0	0/0	0/0	0/0	0/0	0/0	1/1	1/1	0/0	0/0	1/1	1/1	0/0	0/0	0/0	0/0	0/0	0/0	0/0	0/0	0/0	0/0
6	126150081	SNP-6-126150081	G	C	AC=124;AF=0.827;AN=150;CSQ=C|intron_variant|MODIFIER||Zm00001d037465|Transcript|Zm00001d037465_T001|protein_coding||1/10||||||||||-1|||,C|intron_variant|MODIFIER||Zm00001d037465|Transcript|Zm00001d037465_T002|protein_coding||1/10||||||||||-1|||,C|intron_variant|MODIFIER||Zm00001d037465|Transcript|Zm00001d037465_T003|protein_coding||1/9||||||||||-1|||,C|intron_variant|MODIFIER||Zm00001d037465|Tran…	1/1	1/1	1/1	0/0	1/1	1/1	0/0	1/1	1/1	1/1	1/1	1/1	./.	1/1	1/1	1/1	1/1	1/1	1/1	1/1	0/0	1/1	1/1	0/0	0/0	0/0	1/1	1/1	1/1	./.	1/1	1/1	1/1	./.	1/1	1/1	1/1	1/1	1/1	1/1	1/1	1/1	1/1	0/0
6	126150105	SNP-6-126150105	C	T	AC=18;AF=0.118;AN=152;CSQ=T|intron_variant|MODIFIER||Zm00001d037465|Transcript|Zm00001d037465_T001|protein_coding||1/10||||||||||-1|||,T|intron_variant|MODIFIER||Zm00001d037465|Transcript|Zm00001d037465_T002|protein_coding||1/10||||||||||-1|||,T|intron_variant|MODIFIER||Zm00001d037465|Transcript|Zm00001d037465_T003|protein_coding||1/9||||||||||-1|||,T|intron_variant|MODIFIER||Zm00001d037465|Trans…	1/1	0/0	0/0	0/0	0/0	0/0	0/0	0/0	0/0	1/1	0/0	0/0	0/0	0/0	0/0	0/0	0/0	0/0	0/0	0/0	0/0	0/0	0/0	0/0	0/0	0/0	0/0	0/0	1/1	0/0	0/0	0/0	0/0	./.	0/0	0/0	0/0	0/0	0/0	0/0	0/0	0/0	0/0	0/0
6	126150142	SNP-6-126150142	A	C	AC=52;AF=0.333;AN=156;BaseQRankSum=1.47;CSQ=C|intron_variant|MODIFIER||Zm00001d037465|Transcript|Zm00001d037465_T001|protein_coding||1/10||||||||||-1|||,C|intron_variant|MODIFIER||Zm00001d037465|Transcript|Zm00001d037465_T002|protein_coding||1/10||||||||||-1|||,C|intron_variant|MODIFIER||Zm00001d037465|Transcript|Zm00001d037465_T003|protein_coding||1/9||||||||||-1|||,C|intron_variant|MODIFIER||Zm…	0/0	0/0	0/0	0/0	0/0	1/1	0/0	0/0	0/0	0/0	1/1	1/1	./.	0/0	0/0	0/0	1/1	0/0	1/1	0/0	0/0	0/0	1/1	0/0	0/0	0/0	0/0	0/0	0/0	0/0	1/1	1/1	0/0	0/0	1/1	1/1	1/1	1/1	0/0	1/1	1/1	0/0	0/0	0/0
6	126150191	DEL-6-126150191	TAA	T	AC=20;AF=0.127;AN=158;CSQ=-|intron_variant|MODIFIER||Zm00001d037465|Transcript|Zm00001d037465_T001|protein_coding||1/10||||||||||-1|||,-|intron_variant|MODIFIER||Zm00001d037465|Transcript|Zm00001d037465_T002|protein_coding||1/10||||||||||-1|||,-|intron_variant|MODIFIER||Zm00001d037465|Transcript|Zm00001d037465_T003|protein_coding||1/9||||||||||-1|||,-|intron_variant|MODIFIER||Zm00001d037465|Trans…	0/0	0/0	0/0	0/0	0/0	0/0	0/0	0/0	0/0	0/0	0/0	0/0	0/0	1/1	0/0	./.	0/0	1/1	0/0	0/0	0/0	0/0	0/0	0/0	0/0	0/0	1/1	0/0	0/0	0/0	0/0	0/0	0/0	0/0	0/0	0/0	0/0	0/0	1/1	0/0	0/0	0/0	0/0	0/0
6	126150204	SNP-6-126150204	T	A	AC=28;AF=0.182;AN=154;CSQ=A|intron_variant|MODIFIER||Zm00001d037465|Transcript|Zm00001d037465_T001|protein_coding||1/10||||||||||-1|||,A|intron_variant|MODIFIER||Zm00001d037465|Transcript|Zm00001d037465_T002|protein_coding||1/10||||||||||-1|||,A|intron_variant|MODIFIER||Zm00001d037465|Transcript|Zm00001d037465_T003|protein_coding||1/9||||||||||-1|||,A|intron_variant|MODIFIER||Zm00001d037465|Trans…	./.	0/0	0/0	0/0	0/0	0/0	0/0	0/0	0/0	1/1	0/0	0/0	0/0	0/0	0/0	./.	./.	0/0	0/0	1/1	0/0	0/0	0/0	0/0	0/0	0/0	0/0	0/0	1/1	1/1	0/0	0/0	1/1	1/1	0/0	0/0	0/0	0/0	0/0	0/0	0/0	0/0	0/0	0/0
6	126150228	DEL-6-126150228	AG	A	AC=94;AF=0.627;AN=150;CSQ=-|intron_variant|MODIFIER||Zm00001d037465|Transcript|Zm00001d037465_T001|protein_coding||1/10||||||||||-1|||,-|intron_variant|MODIFIER||Zm00001d037465|Transcript|Zm00001d037465_T002|protein_coding||1/10||||||||||-1|||,-|intron_variant|MODIFIER||Zm00001d037465|Transcript|Zm00001d037465_T003|protein_coding||1/9||||||||||-1|||,-|intron_variant|MODIFIER||Zm00001d037465|Trans…	0/0	1/1	1/1	0/0	1/1	1/1	0/0	1/1	1/1	0/0	1/1	1/1	1/1	1/1	1/1	./.	./.	1/1	1/1	0/0	0/0	1/1	1/1	0/0	0/0	0/0	1/1	1/1	0/0	0/0	1/1	1/1	0/0	0/0	1/1	1/1	1/1	1/1	1/1	1/1	1/1	./.	1/1	0/0
6	126150244	SNP-6-126150244	C	A	AC=94;AF=0.627;AN=150;CSQ=A|intron_variant|MODIFIER||Zm00001d037465|Transcript|Zm00001d037465_T001|protein_coding||1/10||||||||||-1|||,A|intron_variant|MODIFIER||Zm00001d037465|Transcript|Zm00001d037465_T002|protein_coding||1/10||||||||||-1|||,A|intron_variant|MODIFIER||Zm00001d037465|Transcript|Zm00001d037465_T003|protein_coding||1/9||||||||||-1|||,A|intron_variant|MODIFIER||Zm00001d037465|Trans…	0/0	1/1	1/1	0/0	1/1	1/1	0/0	1/1	1/1	0/0	1/1	1/1	1/1	1/1	1/1	./.	./.	1/1	1/1	0/0	0/0	1/1	1/1	0/0	0/0	0/0	1/1	1/1	0/0	0/0	1/1	1/1	0/0	0/0	1/1	1/1	1/1	1/1	1/1	1/1	1/1	./.	1/1	0/0
6	126150256	SNP-6-126150256	A	G	AC=124;AF=0.827;AN=150;CSQ=G|intron_variant|MODIFIER||Zm00001d037465|Transcript|Zm00001d037465_T001|protein_coding||1/10||||||||||-1|||,G|intron_variant|MODIFIER||Zm00001d037465|Transcript|Zm00001d037465_T002|protein_coding||1/10||||||||||-1|||,G|intron_variant|MODIFIER||Zm00001d037465|Transcript|Zm00001d037465_T003|protein_coding||1/9||||||||||-1|||,G|intron_variant|MODIFIER||Zm00001d037465|Tran…	1/1	1/1	1/1	0/0	1/1	1/1	0/0	1/1	1/1	1/1	1/1	1/1	1/1	1/1	1/1	./.	./.	1/1	1/1	1/1	0/0	1/1	1/1	0/0	0/0	0/0	1/1	1/1	1/1	1/1	1/1	1/1	1/1	1/1	1/1	1/1	1/1	1/1	1/1	1/1	1/1	./.	1/1	0/0
6	126150269	SNP-6-126150269	G	A	AC=8;AF=0.05;AN=160;CSQ=A|intron_variant|MODIFIER||Zm00001d037465|Transcript|Zm00001d037465_T001|protein_coding||1/10||||||||||-1|||,A|intron_variant|MODIFIER||Zm00001d037465|Transcript|Zm00001d037465_T002|protein_coding||1/10||||||||||-1|||,A|intron_variant|MODIFIER||Zm00001d037465|Transcript|Zm00001d037465_T003|protein_coding||1/9||||||||||-1|||,A|intron_variant|MODIFIER||Zm00001d037465|Transcr…	0/0	0/0	0/0	0/0	0/0	0/0	0/0	0/0	0/0	0/0	0/0	0/0	0/0	0/0	0/0	0/0	0/0	0/0	0/0	1/1	0/0	0/0	0/0	0/0	0/0	0/0	0/0	0/0	0/0	1/1	0/0	0/0	1/1	1/1	0/0	0/0	0/0	0/0	0/0	0/0	0/0	0/0	0/0	0/0
6	126150271	SNP-6-126150271	C	T	AC=124;AF=0.827;AN=150;CSQ=T|intron_variant|MODIFIER||Zm00001d037465|Transcript|Zm00001d037465_T001|protein_coding||1/10||||||||||-1|||,T|intron_variant|MODIFIER||Zm00001d037465|Transcript|Zm00001d037465_T002|protein_coding||1/10||||||||||-1|||,T|intron_variant|MODIFIER||Zm00001d037465|Transcript|Zm00001d037465_T003|protein_coding||1/9||||||||||-1|||,T|intron_variant|MODIFIER||Zm00001d037465|Tran…	1/1	1/1	1/1	0/0	1/1	1/1	0/0	1/1	1/1	1/1	1/1	1/1	1/1	1/1	1/1	./.	./.	1/1	1/1	1/1	0/0	1/1	1/1	0/0	0/0	0/0	1/1	1/1	1/1	1/1	1/1	1/1	1/1	1/1	1/1	1/1	1/1	1/1	1/1	1/1	1/1	./.	1/1	0/0
6	126150282	SNP-6-126150282	A	G	AC=94;AF=0.627;AN=150;CSQ=G|intron_variant|MODIFIER||Zm00001d037465|Transcript|Zm00001d037465_T001|protein_coding||1/10||||||||||-1|||,G|intron_variant|MODIFIER||Zm00001d037465|Transcript|Zm00001d037465_T002|protein_coding||1/10||||||||||-1|||,G|intron_variant|MODIFIER||Zm00001d037465|Transcript|Zm00001d037465_T003|protein_coding||1/9||||||||||-1|||,G|intron_variant|MODIFIER||Zm00001d037465|Trans…	0/0	1/1	1/1	0/0	1/1	1/1	0/0	1/1	1/1	0/0	1/1	1/1	1/1	1/1	1/1	./.	./.	1/1	1/1	0/0	0/0	1/1	1/1	0/0	0/0	0/0	1/1	1/1	0/0	0/0	1/1	1/1	0/0	0/0	1/1	1/1	1/1	1/1	1/1	1/1	1/1	./.	1/1	0/0
6	126150283	SNP-6-126150283	C	T	AC=50;AF=0.325;AN=154;CSQ=T|intron_variant|MODIFIER||Zm00001d037465|Transcript|Zm00001d037465_T001|protein_coding||1/10||||||||||-1|||,T|intron_variant|MODIFIER||Zm00001d037465|Transcript|Zm00001d037465_T002|protein_coding||1/10||||||||||-1|||,T|intron_variant|MODIFIER||Zm00001d037465|Transcript|Zm00001d037465_T003|protein_coding||1/9||||||||||-1|||,T|intron_variant|MODIFIER||Zm00001d037465|Trans…	0/0	0/0	0/0	0/0	0/0	1/1	0/0	0/0	0/0	0/0	1/1	1/1	1/1	0/0	0/0	0/0	./.	0/0	1/1	0/0	0/0	0/0	1/1	0/0	0/0	0/0	0/0	0/0	0/0	0/0	1/1	1/1	0/0	0/0	1/1	1/1	1/1	1/1	0/0	1/1	1/1	0/0	0/0	0/0
6	126150294	SNP-6-126150294	A	C	AC=30;AF=0.19;AN=158;CSQ=C|intron_variant|MODIFIER||Zm00001d037465|Transcript|Zm00001d037465_T001|protein_coding||1/10||||||||||-1|||,C|intron_variant|MODIFIER||Zm00001d037465|Transcript|Zm00001d037465_T002|protein_coding||1/10||||||||||-1|||,C|intron_variant|MODIFIER||Zm00001d037465|Transcript|Zm00001d037465_T003|protein_coding||1/9||||||||||-1|||,C|intron_variant|MODIFIER||Zm00001d037465|Transc…	1/1	0/0	0/0	0/0	0/0	0/0	0/0	0/0	0/0	1/1	0/0	0/0	0/0	0/0	0/0	0/0	0/0	0/0	0/0	1/1	0/0	0/0	0/0	0/0	0/0	0/0	0/0	0/0	1/1	1/1	0/0	0/0	1/1	1/1	0/0	0/0	0/0	0/0	0/0	0/0	0/0	0/0	0/0	0/0
6	126150337	SNP-6-126150337	G	A	AC=23;AF=0.146;AN=158;BaseQRankSum=-0.674;CSQ=A|intron_variant|MODIFIER||Zm00001d037465|Transcript|Zm00001d037465_T001|protein_coding||1/10||||||||||-1|||,A|intron_variant|MODIFIER||Zm00001d037465|Transcript|Zm00001d037465_T002|protein_coding||1/10||||||||||-1|||,A|intron_variant|MODIFIER||Zm00001d037465|Transcript|Zm00001d037465_T003|protein_coding||1/9||||||||||-1|||,A|intron_variant|MODIFIER||…	1/1	0/0	0/0	0/0	0/0	0/0	0/0	0/0	0/0	1/1	0/0	0/0	0/0	0/0	0/0	0/0	0/0	0/0	0/0	0/0	0/0	0/0	0/0	0/0	0/0	0/0	0/0	0/0	1/1	0/0	0/0	0/0	0/0	0/1	0/0	0/0	0/0	0/0	0/0	0/0	0/0	0/0	0/0	0/0
6	126150377	DEL-6-126150377	ATAATATAGC	A	AC=122;AF=0.824;AN=148;CSQ=-|intron_variant|MODIFIER||Zm00001d037465|Transcript|Zm00001d037465_T001|protein_coding||1/10||||||||||-1|||,-|intron_variant|MODIFIER||Zm00001d037465|Transcript|Zm00001d037465_T002|protein_coding||1/10||||||||||-1|||,-|intron_variant|MODIFIER||Zm00001d037465|Transcript|Zm00001d037465_T003|protein_coding||1/9||||||||||-1|||,-|intron_variant|MODIFIER||Zm00001d037465|Tran…	1/1	1/1	./.	0/0	1/1	1/1	0/0	./.	1/1	1/1	1/1	1/1	1/1	1/1	1/1	1/1	1/1	1/1	1/1	1/1	0/0	1/1	1/1	0/0	0/0	0/0	1/1	1/1	1/1	1/1	1/1	1/1	1/1	1/1	1/1	1/1	1/1	1/1	1/1	1/1	1/1	./.	1/1	0/0
6	126150441	DEL-6-126150441	GAATGTACAGTATATTATTTCTCCA	G	AC=122;AF=0.803;AN=152;CSQ=-|intron_variant|MODIFIER||Zm00001d037465|Transcript|Zm00001d037465_T001|protein_coding||1/10||||||||||-1|||,-|intron_variant|MODIFIER||Zm00001d037465|Transcript|Zm00001d037465_T002|protein_coding||1/10||||||||||-1|||,-|intron_variant|MODIFIER||Zm00001d037465|Transcript|Zm00001d037465_T003|protein_coding||1/9||||||||||-1|||,-|intron_variant|MODIFIER||Zm00001d037465|Tran…	1/1	1/1	0/0	0/0	1/1	1/1	0/0	1/1	1/1	1/1	1/1	1/1	1/1	1/1	1/1	1/1	1/1	1/1	1/1	1/1	0/0	./.	1/1	0/0	0/0	0/0	1/1	1/1	1/1	1/1	1/1	1/1	1/1	1/1	1/1	1/1	1/1	1/1	1/1	1/1	1/1	1/1	1/1	0/0
6	126150650	SNP-6-126150650	T	C	AC=128;AF=0.842;AN=152;CSQ=C|intron_variant|MODIFIER||Zm00001d037465|Transcript|Zm00001d037465_T001|protein_coding||1/10||||||||||-1|||,C|intron_variant|MODIFIER||Zm00001d037465|Transcript|Zm00001d037465_T002|protein_coding||1/10||||||||||-1|||,C|intron_variant|MODIFIER||Zm00001d037465|Transcript|Zm00001d037465_T003|protein_coding||1/9||||||||||-1|||,C|intron_variant|MODIFIER||Zm00001d037465|Tran…	1/1	1/1	./.	0/0	1/1	1/1	0/0	1/1	1/1	1/1	1/1	1/1	1/1	1/1	1/1	1/1	./.	1/1	1/1	1/1	0/0	1/1	1/1	0/0	./.	0/0	1/1	1/1	1/1	1/1	1/1	1/1	1/1	1/1	1/1	1/1	1/1	1/1	1/1	1/1	1/1	1/1	1/1	0/0
6	126150813	SNP-6-126150813	G	A	AC=102;AF=0.654;AN=156;BaseQRankSum=0;CSQ=A|synonymous_variant|LOW||Zm00001d037465|Transcript|Zm00001d037465_T001|protein_coding|1/11||||539|285|95|A|gcC/gcT|||-1|||,A|synonymous_variant|LOW||Zm00001d037465|Transcript|Zm00001d037465_T002|protein_coding|1/11||||1146|285|95|A|gcC/gcT|||-1|||,A|synonymous_variant|LOW||Zm00001d037465|Transcript|Zm00001d037465_T003|protein_coding|1/10||||1146|285|95|A…	0/0	1/1	1/1	0/0	1/1	1/1	0/0	0/1	1/1	0/1	1/1	1/1	1/1	1/1	1/1	1/1	1/1	./.	1/1	0/0	0/0	1/1	1/1	0/0	0/0	0/0	1/1	1/1	0/0	0/0	1/1	1/1	0/0	0/0	1/1	1/1	1/1	1/1	1/1	1/1	1/1	1/1	1/1	0/0
6	126150966	SNP-6-126150966	A	G	AC=97;AF=0.638;AN=152;BaseQRankSum=0.566;CSQ=G|synonymous_variant|LOW||Zm00001d037465|Transcript|Zm00001d037465_T001|protein_coding|1/11||||386|132|44|N|aaT/aaC|||-1|||,G|synonymous_variant|LOW||Zm00001d037465|Transcript|Zm00001d037465_T002|protein_coding|1/11||||993|132|44|N|aaT/aaC|||-1|||,G|synonymous_variant|LOW||Zm00001d037465|Transcript|Zm00001d037465_T003|protein_coding|1/10||||993|132|44|…	0/0	1/1	1/1	0/0	1/1	1/1	0/0	1/1	1/1	0/1	1/1	1/1	1/1	./.	1/1	1/1	1/1	1/1	1/1	0/0	0/0	1/1	1/1	0/0	0/0	0/0	1/1	1/1	0/0	0/0	1/1	./.	0/0	0/0	1/1	1/1	1/1	1/1	1/1	1/1	1/1	1/1	1/1	0/0
6	126150999	SNP-6-126150999	C	T	AC=27;AF=0.171;AN=158;BaseQRankSum=-2.253;CSQ=T|synonymous_variant|LOW||Zm00001d037465|Transcript|Zm00001d037465_T001|protein_coding|1/11||||353|99|33|G|ggG/ggA|||-1|||,T|synonymous_variant|LOW||Zm00001d037465|Transcript|Zm00001d037465_T002|protein_coding|1/11||||960|99|33|G|ggG/ggA|||-1|||,T|synonymous_variant|LOW||Zm00001d037465|Transcript|Zm00001d037465_T003|protein_coding|1/10||||960|99|33|G|…	1/1	0/0	0/0	0/0	0/0	0/0	0/0	0/0	0/0	0/1	0/0	0/0	0/0	0/0	0/0	0/0	0/0	0/0	0/0	./.	0/0	0/0	0/0	0/0	0/0	0/0	0/0	0/0	1/1	1/1	0/0	0/0	1/1	1/1	0/0	0/0	0/0	0/0	0/0	0/0	0/0	0/0	0/0	0/0
6	126151017	SNP-6-126151017	A	G	AC=102;AF=0.654;AN=156;BaseQRankSum=0;CSQ=G|synonymous_variant|LOW||Zm00001d037465|Transcript|Zm00001d037465_T001|protein_coding|1/11||||335|81|27|D|gaT/gaC|||-1|||,G|synonymous_variant|LOW||Zm00001d037465|Transcript|Zm00001d037465_T002|protein_coding|1/11||||942|81|27|D|gaT/gaC|||-1|||,G|synonymous_variant|LOW||Zm00001d037465|Transcript|Zm00001d037465_T003|protein_coding|1/10||||942|81|27|D|gaT/…	0/0	1/1	1/1	0/0	1/1	1/1	0/0	1/1	1/1	0/1	1/1	1/1	1/1	1/1	1/1	1/1	1/1	1/1	1/1	0/0	0/0	1/1	1/1	0/0	0/0	0/0	1/1	1/1	0/0	0/0	1/1	1/1	0/0	0/0	1/1	1/1	1/1	1/1	1/1	1/1	1/1	1/1	./.	0/0
6	126151031	SNP-6-126151031	C	T	AC=130;AF=0.855;AN=152;CSQ=T|missense_variant|MODERATE||Zm00001d037465|Transcript|Zm00001d037465_T001|protein_coding|1/11||||321|67|23|G/R|Ggg/Agg|||-1|||,T|missense_variant|MODERATE||Zm00001d037465|Transcript|Zm00001d037465_T002|protein_coding|1/11||||928|67|23|G/R|Ggg/Agg|||-1|||,T|missense_variant|MODERATE||Zm00001d037465|Transcript|Zm00001d037465_T003|protein_coding|1/10||||928|67|23|G/R|Ggg/…	1/1	1/1	1/1	0/0	1/1	1/1	0/0	1/1	1/1	1/1	1/1	1/1	1/1	1/1	1/1	1/1	1/1	1/1	1/1	./.	0/0	1/1	1/1	0/0	./.	0/0	1/1	1/1	1/1	1/1	1/1	1/1	1/1	1/1	1/1	1/1	1/1	1/1	1/1	1/1	1/1	1/1	./.	0/0
6	126151143	INS-6-126151143	G	GC	AC=23;AF=0.151;AN=152;BaseQRankSum=0;CSQ=C|5_prime_UTR_variant|MODIFIER||Zm00001d037465|Transcript|Zm00001d037465_T001|protein_coding|1/11||||208-209|||||||-1|||,C|5_prime_UTR_variant|MODIFIER||Zm00001d037465|Transcript|Zm00001d037465_T002|protein_coding|1/11||||815-816|||||||-1|||,C|5_prime_UTR_variant|MODIFIER||Zm00001d037465|Transcript|Zm00001d037465_T003|protein_coding|1/10||||815-816|||||||-…	1/1	0/0	0/0	0/0	0/0	0/0	0/0	0/0	0/0	0/1	0/0	0/0	0/0	0/0	0/0	0/0	0/0	0/0	0/0	./.	0/0	0/0	0/0	0/0	0/0	0/0	0/0	0/0	1/1	1/1	0/0	0/0	1/1	1/1	0/0	0/0	0/0	0/0	0/0	./.	0/0	0/0	0/0	0/0
6	126151162	SNP-6-126151162	G	A	AC=55;AF=0.357;AN=154;BaseQRankSum=-1.15;CSQ=A|5_prime_UTR_variant|MODIFIER||Zm00001d037465|Transcript|Zm00001d037465_T001|protein_coding|1/11||||190|||||||-1|||,A|5_prime_UTR_variant|MODIFIER||Zm00001d037465|Transcript|Zm00001d037465_T002|protein_coding|1/11||||797|||||||-1|||,A|5_prime_UTR_variant|MODIFIER||Zm00001d037465|Transcript|Zm00001d037465_T003|protein_coding|1/10||||797|||||||-1|||,A|5…	0/0	0/0	0/0	0/0	0/0	1/1	0/0	0/0	0/0	0/1	1/1	1/1	1/1	0/0	0/0	0/0	1/1	0/0	1/1	./.	0/0	0/0	1/1	0/0	0/0	0/0	0/0	0/0	0/0	0/0	1/1	1/1	0/0	0/0	1/1	1/1	1/1	1/1	0/0	./.	1/1	0/0	0/0	0/0
6	126151232	DEL-6-126151232	CA	C	AC=21;AF=0.14;AN=150;BaseQRankSum=-1.465;CSQ=-|5_prime_UTR_variant|MODIFIER||Zm00001d037465|Transcript|Zm00001d037465_T001|protein_coding|1/11||||119|||||||-1|||,-|5_prime_UTR_variant|MODIFIER||Zm00001d037465|Transcript|Zm00001d037465_T002|protein_coding|1/11||||726|||||||-1|||,-|5_prime_UTR_variant|MODIFIER||Zm00001d037465|Transcript|Zm00001d037465_T003|protein_coding|1/10||||726|||||||-1|||,-|5…	0/0	1/1	1/1	0/0	1/1	0/0	0/0	0/1	1/1	0/0	0/0	0/0	0/0	0/0	1/1	1/1	0/0	0/0	0/0	./.	0/0	1/1	0/0	0/0	0/0	./.	0/0	1/1	0/0	0/0	0/0	0/0	0/0	0/0	0/0	0/0	0/0	0/0	0/0	0/0	0/0	./.	0/0	0/0
6	126151267	SNP-6-126151267	T	C	AC=128;AF=0.842;AN=152;CSQ=C|5_prime_UTR_variant|MODIFIER||Zm00001d037465|Transcript|Zm00001d037465_T001|protein_coding|1/11||||85|||||||-1|||,C|5_prime_UTR_variant|MODIFIER||Zm00001d037465|Transcript|Zm00001d037465_T002|protein_coding|1/11||||692|||||||-1|||,C|5_prime_UTR_variant|MODIFIER||Zm00001d037465|Transcript|Zm00001d037465_T003|protein_coding|1/10||||692|||||||-1|||,C|5_prime_UTR_variant|…	1/1	1/1	1/1	0/0	1/1	1/1	0/0	1/1	1/1	1/1	1/1	1/1	1/1	1/1	1/1	1/1	1/1	1/1	1/1	./.	0/0	1/1	1/1	0/0	0/0	./.	1/1	1/1	1/1	1/1	1/1	1/1	1/1	1/1	1/1	1/1	1/1	1/1	1/1	1/1	1/1	./.	./.	0/0
6	126151274	SNP-6-126151274	G	A	AC=28;AF=0.179;AN=156;BaseQRankSum=0.589;CSQ=A|5_prime_UTR_variant|MODIFIER||Zm00001d037465|Transcript|Zm00001d037465_T001|protein_coding|1/11||||78|||||||-1|||,A|5_prime_UTR_variant|MODIFIER||Zm00001d037465|Transcript|Zm00001d037465_T002|protein_coding|1/11||||685|||||||-1|||,A|5_prime_UTR_variant|MODIFIER||Zm00001d037465|Transcript|Zm00001d037465_T003|protein_coding|1/10||||685|||||||-1|||,A|5_…	1/1	0/0	0/0	0/0	0/0	0/0	0/0	0/1	0/0	0/1	0/0	0/0	0/0	0/0	0/0	0/0	0/0	0/0	0/0	./.	0/0	0/0	0/0	0/0	0/0	./.	0/0	0/0	1/1	1/1	0/0	0/0	1/1	1/1	0/0	0/0	0/0	0/0	0/0	0/0	0/0	0/0	0/0	0/0
6	126151323	SNP-6-126151323	T	C	AC=19;AF=0.12;AN=158;BaseQRankSum=1.92;CSQ=C|5_prime_UTR_variant|MODIFIER||Zm00001d037465|Transcript|Zm00001d037465_T001|protein_coding|1/11||||29|||||||-1|||,C|5_prime_UTR_variant|MODIFIER||Zm00001d037465|Transcript|Zm00001d037465_T002|protein_coding|1/11||||636|||||||-1|||,C|5_prime_UTR_variant|MODIFIER||Zm00001d037465|Transcript|Zm00001d037465_T003|protein_coding|1/10||||636|||||||-1|||,C|5_pr…	./.	0/0	0/0	0/0	0/0	0/0	0/0	0/1	0/0	0/0	0/0	0/0	0/0	0/0	0/0	0/0	0/0	0/0	0/0	0/0	0/0	0/0	0/0	0/0	0/0	0/0	0/0	0/0	1/1	0/0	0/0	0/0	0/0	0/0	0/0	0/0	0/0	0/0	0/0	0/0	0/0	0/0	0/0	0/0
6	126151462	SNP-6-126151462	C	T	AC=18;AF=0.115;AN=156;CSQ=T|upstream_gene_variant|MODIFIER||Zm00001d037465|Transcript|Zm00001d037465_T001|protein_coding|||||||||||111|-1|||,T|5_prime_UTR_variant|MODIFIER||Zm00001d037465|Transcript|Zm00001d037465_T002|protein_coding|1/11||||497|||||||-1|||,T|5_prime_UTR_variant|MODIFIER||Zm00001d037465|Transcript|Zm00001d037465_T003|protein_coding|1/10||||497|||||||-1|||,T|5_prime_UTR_variant|MO…	1/1	0/0	0/0	0/0	0/0	0/0	0/0	0/0	0/0	./.	0/0	0/0	0/0	0/0	0/0	0/0	0/0	0/0	0/0	0/0	0/0	0/0	0/0	0/0	0/0	0/0	0/0	0/0	1/1	0/0	0/0	0/0	0/0	0/0	0/0	0/0	0/0	0/0	0/0	0/0	0/0	0/0	0/0	0/0
6	126151535	SNP-6-126151535	C	G	AC=118;AF=0.819;AN=144;BaseQRankSum=0.674;CSQ=G|upstream_gene_variant|MODIFIER||Zm00001d037465|Transcript|Zm00001d037465_T001|protein_coding|||||||||||184|-1|||,G|5_prime_UTR_variant|MODIFIER||Zm00001d037465|Transcript|Zm00001d037465_T002|protein_coding|1/11||||424|||||||-1|||,G|5_prime_UTR_variant|MODIFIER||Zm00001d037465|Transcript|Zm00001d037465_T003|protein_coding|1/10||||424|||||||-1|||,G|5_…	1/1	1/1	1/1	0/0	1/1	1/1	0/0	1/1	1/1	1/1	1/1	1/1	1/1	1/1	./.	1/1	1/1	1/1	1/1	./.	0/0	1/1	1/1	0/0	0/0	0/0	1/1	1/1	./.	1/1	1/1	1/1	1/1	1/1	1/1	1/1	1/1	1/1	1/1	1/1	1/1	1/1	1/1	0/0
6	126151638	SNP-6-126151638	C	G	AC=120;AF=0.833;AN=144;CSQ=G|upstream_gene_variant|MODIFIER||Zm00001d037465|Transcript|Zm00001d037465_T001|protein_coding|||||||||||287|-1|||,G|5_prime_UTR_variant|MODIFIER||Zm00001d037465|Transcript|Zm00001d037465_T002|protein_coding|1/11||||321|||||||-1|||,G|5_prime_UTR_variant|MODIFIER||Zm00001d037465|Transcript|Zm00001d037465_T003|protein_coding|1/10||||321|||||||-1|||,G|5_prime_UTR_variant|M…	1/1	1/1	1/1	0/0	1/1	1/1	0/0	1/1	1/1	1/1	./.	1/1	1/1	1/1	./.	1/1	1/1	./.	1/1	1/1	0/0	1/1	1/1	0/0	0/0	0/0	1/1	1/1	1/1	1/1	1/1	1/1	./.	1/1	1/1	1/1	1/1	1/1	1/1	1/1	1/1	1/1	1/1	0/0
6	126151688	SNP-6-126151688	C	T	AC=102;AF=0.689;AN=148;BaseQRankSum=-0.253;CSQ=T|upstream_gene_variant|MODIFIER||Zm00001d037465|Transcript|Zm00001d037465_T001|protein_coding|||||||||||337|-1|||,T|5_prime_UTR_variant|MODIFIER||Zm00001d037465|Transcript|Zm00001d037465_T002|protein_coding|1/11||||271|||||||-1|||,T|5_prime_UTR_variant|MODIFIER||Zm00001d037465|Transcript|Zm00001d037465_T003|protein_coding|1/10||||271|||||||-1|||,T|5…	0/0	1/1	1/1	0/0	1/1	1/1	0/0	1/1	1/1	0/1	./.	1/1	1/1	1/1	./.	1/1	1/1	1/1	1/1	1/1	0/0	1/1	1/1	0/0	0/0	0/0	1/1	1/1	0/0	1/1	1/1	1/1	1/1	1/1	1/1	1/1	1/1	1/1	1/1	1/1	./.	1/1	1/1	0/0
6	126151721	SNP-6-126151721	C	G	AC=118;AF=0.831;AN=142;CSQ=G|upstream_gene_variant|MODIFIER||Zm00001d037465|Transcript|Zm00001d037465_T001|protein_coding|||||||||||370|-1|||,G|5_prime_UTR_variant|MODIFIER||Zm00001d037465|Transcript|Zm00001d037465_T002|protein_coding|1/11||||238|||||||-1|||,G|5_prime_UTR_variant|MODIFIER||Zm00001d037465|Transcript|Zm00001d037465_T003|protein_coding|1/10||||238|||||||-1|||,G|5_prime_UTR_variant|M…	./.	1/1	1/1	0/0	1/1	1/1	0/0	1/1	1/1	1/1	./.	1/1	1/1	1/1	./.	1/1	1/1	1/1	1/1	1/1	0/0	1/1	1/1	0/0	0/0	0/0	1/1	1/1	1/1	./.	1/1	1/1	1/1	1/1	1/1	1/1	1/1	1/1	1/1	1/1	./.	1/1	1/1	0/0
6	126151744	SNP-6-126151744	T	G	AC=98;AF=0.671;AN=146;BaseQRankSum=-0.21;CSQ=G|upstream_gene_variant|MODIFIER||Zm00001d037465|Transcript|Zm00001d037465_T001|protein_coding|||||||||||393|-1|||,G|5_prime_UTR_variant|MODIFIER||Zm00001d037465|Transcript|Zm00001d037465_T002|protein_coding|1/11||||215|||||||-1|||,G|5_prime_UTR_variant|MODIFIER||Zm00001d037465|Transcript|Zm00001d037465_T003|protein_coding|1/10||||215|||||||-1|||,G|5_p…	0/0	1/1	./.	0/0	1/1	1/1	0/0	1/1	1/1	0/1	1/1	1/1	1/1	1/1	./.	1/1	1/1	1/1	1/1	1/1	0/0	1/1	./.	0/0	0/0	0/0	1/1	1/1	0/0	./.	1/1	1/1	1/1	1/1	1/1	1/1	1/1	1/1	1/1	1/1	./.	1/1	1/1	0/0
6	126151841	SNP-6-126151841	A	C	AC=122;AF=0.824;AN=148;CSQ=C|upstream_gene_variant|MODIFIER||Zm00001d037465|Transcript|Zm00001d037465_T001|protein_coding|||||||||||490|-1|||,C|5_prime_UTR_variant|MODIFIER||Zm00001d037465|Transcript|Zm00001d037465_T002|protein_coding|1/11||||118|||||||-1|||,C|5_prime_UTR_variant|MODIFIER||Zm00001d037465|Transcript|Zm00001d037465_T003|protein_coding|1/10||||118|||||||-1|||,C|5_prime_UTR_variant|M…	1/1	1/1	1/1	0/0	1/1	1/1	0/0	1/1	1/1	1/1	1/1	1/1	1/1	1/1	1/1	1/1	1/1	1/1	1/1	1/1	0/0	1/1	1/1	0/0	0/0	0/0	1/1	./.	1/1	./.	1/1	1/1	1/1	1/1	1/1	1/1	1/1	1/1	1/1	1/1	1/1	1/1	1/1	0/0
6	126151859	DEL-6-126151859	CGA	C	AC=19;AF=0.122;AN=156;BaseQRankSum=0.126;CSQ=-|upstream_gene_variant|MODIFIER||Zm00001d037465|Transcript|Zm00001d037465_T001|protein_coding|||||||||||509|-1|||,-|5_prime_UTR_variant|MODIFIER||Zm00001d037465|Transcript|Zm00001d037465_T002|protein_coding|1/11||||98-99|||||||-1|||,-|5_prime_UTR_variant|MODIFIER||Zm00001d037465|Transcript|Zm00001d037465_T003|protein_coding|1/10||||98-99|||||||-1|||,-…	1/1	0/0	0/0	0/0	0/0	0/0	0/0	0/0	0/0	0/0	0/0	0/0	0/0	0/0	0/0	0/0	0/0	0/0	0/0	0/0	0/0	0/0	0/0	0/0	0/0	0/0	0/0	0/0	1/1	./.	0/0	0/0	0/0	0/0	0/0	0/0	0/0	0/0	0/0	0/0	0/0	0/0	0/0	0/0
6	126151890	INS-6-126151890	T	TGA	AC=19;AF=0.122;AN=156;BaseQRankSum=0;CSQ=GA|upstream_gene_variant|MODIFIER||Zm00001d037465|Transcript|Zm00001d037465_T001|protein_coding|||||||||||539|-1|||,GA|5_prime_UTR_variant|MODIFIER||Zm00001d037465|Transcript|Zm00001d037465_T002|protein_coding|1/11||||68-69|||||||-1|||,GA|5_prime_UTR_variant|MODIFIER||Zm00001d037465|Transcript|Zm00001d037465_T003|protein_coding|1/10||||68-69|||||||-1|||,GA…	1/1	0/0	0/0	0/0	0/0	0/0	0/0	0/0	0/0	0/0	0/0	0/0	0/0	0/0	0/0	0/0	0/0	0/0	0/0	0/0	0/0	0/0	0/0	0/0	0/0	0/0	0/0	0/0	1/1	./.	0/0	0/0	0/0	0/0	0/0	0/0	0/0	0/0	0/0	0/0	0/0	0/0	0/0	0/0
6	126151988	INS-6-126151988	A	AT	AC=22;AF=0.143;AN=154;BaseQRankSum=-0.674;CSQ=T|upstream_gene_variant|MODIFIER||Zm00001d037465|Transcript|Zm00001d037465_T001|protein_coding|||||||||||637|-1|||,T|upstream_gene_variant|MODIFIER||Zm00001d037465|Transcript|Zm00001d037465_T002|protein_coding|||||||||||30|-1|||,T|upstream_gene_variant|MODIFIER||Zm00001d037465|Transcript|Zm00001d037465_T003|protein_coding|||||||||||30|-1|||,T|upstream…	1/1	0/0	0/0	0/0	0/0	0/0	0/0	0/0	0/0	0/1	0/0	0/0	0/0	0/0	0/0	0/0	0/0	0/0	0/0	./.	0/0	0/0	0/0	0/0	0/0	0/0	0/0	0/0	1/1	0/0	0/0	0/0	0/0	0/1	./.	0/0	0/0	0/0	0/0	0/0	0/0	0/0	0/0	0/0
6	126152002	DEL-6-126152002	GC	G	AC=100;AF=0.667;AN=150;BaseQRankSum=0.967;CSQ=-|upstream_gene_variant|MODIFIER||Zm00001d037465|Transcript|Zm00001d037465_T001|protein_coding|||||||||||652|-1|||,-|upstream_gene_variant|MODIFIER||Zm00001d037465|Transcript|Zm00001d037465_T002|protein_coding|||||||||||45|-1|||,-|upstream_gene_variant|MODIFIER||Zm00001d037465|Transcript|Zm00001d037465_T003|protein_coding|||||||||||45|-1|||,-|upstream…	0/0	1/1	1/1	0/0	1/1	1/1	0/0	1/1	1/1	0/0	1/1	1/1	1/1	1/1	1/1	1/1	1/1	1/1	1/1	./.	0/0	1/1	1/1	0/0	0/0	0/0	1/1	1/1	0/0	1/1	1/1	1/1	1/1	0/1	./.	1/1	1/1	1/1	1/1	1/1	1/1	1/1	1/1	0/0
6	126152038	SNP-6-126152038	T	C	AC=53;AF=0.34;AN=156;BaseQRankSum=-0.842;CSQ=C|upstream_gene_variant|MODIFIER||Zm00001d037465|Transcript|Zm00001d037465_T001|protein_coding|||||||||||687|-1|||,C|upstream_gene_variant|MODIFIER||Zm00001d037465|Transcript|Zm00001d037465_T002|protein_coding|||||||||||80|-1|||,C|upstream_gene_variant|MODIFIER||Zm00001d037465|Transcript|Zm00001d037465_T003|protein_coding|||||||||||80|-1|||,C|upstream_…	0/0	0/0	0/0	0/0	0/0	1/1	0/0	0/0	0/0	0/0	1/1	1/1	1/1	0/0	0/0	0/0	1/1	0/0	1/1	0/0	0/0	0/0	1/1	0/0	0/0	0/0	0/0	0/0	0/0	0/0	1/1	1/1	0/0	0/0	1/1	1/1	1/1	1/1	0/0	1/1	1/1	0/0	0/0	0/0
6	126152100	INS-6-126152100	C	CTT	AC=99;AF=0.688;AN=144;BaseQRankSum=-0.431;CSQ=TT|upstream_gene_variant|MODIFIER||Zm00001d037465|Transcript|Zm00001d037465_T001|protein_coding|||||||||||749|-1|||,TT|upstream_gene_variant|MODIFIER||Zm00001d037465|Transcript|Zm00001d037465_T002|protein_coding|||||||||||142|-1|||,TT|upstream_gene_variant|MODIFIER||Zm00001d037465|Transcript|Zm00001d037465_T003|protein_coding|||||||||||142|-1|||,TT|up…	0/0	1/1	1/1	0/0	1/1	1/1	0/0	1/1	1/1	0/1	1/1	1/1	1/1	./.	1/1	1/1	1/1	1/1	1/1	./.	0/0	1/1	1/1	0/0	0/0	0/0	1/1	1/1	0/0	1/1	1/1	1/1	1/1	1/1	1/1	./.	1/1	1/1	1/1	1/1	1/1	1/1	1/1	./.
6	126152137	SNP-6-126152137	G	A	AC=21;AF=0.14;AN=150;BaseQRankSum=-1.834;CSQ=A|upstream_gene_variant|MODIFIER||Zm00001d037465|Transcript|Zm00001d037465_T001|protein_coding|||||||||||786|-1|||,A|upstream_gene_variant|MODIFIER||Zm00001d037465|Transcript|Zm00001d037465_T002|protein_coding|||||||||||179|-1|||,A|upstream_gene_variant|MODIFIER||Zm00001d037465|Transcript|Zm00001d037465_T003|protein_coding|||||||||||179|-1|||,A|upstrea…	1/1	0/0	0/0	0/0	0/0	0/0	0/0	0/0	0/0	0/1	0/0	0/0	0/0	./.	0/0	0/0	0/0	0/0	0/0	0/0	0/0	0/0	0/0	0/0	0/0	0/0	0/0	0/0	1/1	0/0	0/0	0/0	0/0	0/0	0/0	0/0	0/0	./.	0/0	0/0	0/0	0/0	0/0	0/0
6	126152147	SNP-6-126152147	C	T	AC=112;AF=0.824;AN=136;CSQ=T|upstream_gene_variant|MODIFIER||Zm00001d037465|Transcript|Zm00001d037465_T001|protein_coding|||||||||||796|-1|||,T|upstream_gene_variant|MODIFIER||Zm00001d037465|Transcript|Zm00001d037465_T002|protein_coding|||||||||||189|-1|||,T|upstream_gene_variant|MODIFIER||Zm00001d037465|Transcript|Zm00001d037465_T003|protein_coding|||||||||||189|-1|||,T|upstream_gene_variant|MOD…	1/1	1/1	1/1	0/0	1/1	1/1	0/0	1/1	1/1	1/1	1/1	1/1	1/1	./.	1/1	1/1	1/1	1/1	1/1	./.	0/0	1/1	1/1	0/0	0/0	0/0	1/1	1/1	1/1	1/1	1/1	1/1	1/1	1/1	./.	./.	1/1	./.	1/1	1/1	1/1	1/1	1/1	0/0
6	126152156	SNP-6-126152156	G	A	AC=21;AF=0.135;AN=156;BaseQRankSum=-1.068;CSQ=A|upstream_gene_variant|MODIFIER||Zm00001d037465|Transcript|Zm00001d037465_T001|protein_coding|||||||||||805|-1|||,A|upstream_gene_variant|MODIFIER||Zm00001d037465|Transcript|Zm00001d037465_T002|protein_coding|||||||||||198|-1|||,A|upstream_gene_variant|MODIFIER||Zm00001d037465|Transcript|Zm00001d037465_T003|protein_coding|||||||||||198|-1|||,A|upstre…	1/1	0/0	0/0	0/0	0/0	0/0	0/0	0/0	0/0	0/1	0/0	0/0	0/0	0/0	0/0	0/0	0/0	0/0	0/0	0/0	0/0	0/0	0/0	0/0	0/0	0/0	0/0	0/0	1/1	0/0	0/0	0/0	0/0	0/0	0/0	0/0	0/0	0/0	0/0	0/0	0/0	0/0	0/0	0/0
6	126152175	DEL-6-126152175	CT	C	AC=116;AF=0.829;AN=140;CSQ=-|upstream_gene_variant|MODIFIER||Zm00001d037465|Transcript|Zm00001d037465_T001|protein_coding|||||||||||825|-1|||,-|upstream_gene_variant|MODIFIER||Zm00001d037465|Transcript|Zm00001d037465_T002|protein_coding|||||||||||218|-1|||,-|upstream_gene_variant|MODIFIER||Zm00001d037465|Transcript|Zm00001d037465_T003|protein_coding|||||||||||218|-1|||,-|upstream_gene_variant|MOD…	1/1	1/1	1/1	0/0	1/1	1/1	0/0	1/1	1/1	1/1	1/1	1/1	1/1	1/1	1/1	1/1	1/1	1/1	1/1	./.	0/0	1/1	1/1	0/0	0/0	0/0	1/1	1/1	1/1	1/1	1/1	1/1	1/1	1/1	./.	./.	1/1	./.	1/1	1/1	1/1	1/1	1/1	0/0
6	126152191	SNP-6-126152191	T	A	AC=45;AF=0.313;AN=144;BaseQRankSum=1.58;CSQ=A|upstream_gene_variant|MODIFIER||Zm00001d037465|Transcript|Zm00001d037465_T001|protein_coding|||||||||||840|-1|||,A|upstream_gene_variant|MODIFIER||Zm00001d037465|Transcript|Zm00001d037465_T002|protein_coding|||||||||||233|-1|||,A|upstream_gene_variant|MODIFIER||Zm00001d037465|Transcript|Zm00001d037465_T003|protein_coding|||||||||||233|-1|||,A|upstream…	0/0	0/0	0/0	0/0	0/0	1/1	0/0	0/0	0/0	0/1	1/1	1/1	1/1	0/0	0/0	0/0	1/1	0/0	1/1	./.	0/0	0/0	1/1	0/0	0/0	0/0	0/0	0/0	0/0	0/0	1/1	1/1	0/0	0/0	./.	./.	1/1	./.	0/0	1/1	1/1	0/0	0/0	0/0
6	126152195	SNP-6-126152195	T	C	AC=22;AF=0.139;AN=158;BaseQRankSum=1.28;CSQ=C|upstream_gene_variant|MODIFIER||Zm00001d037465|Transcript|Zm00001d037465_T001|protein_coding|||||||||||844|-1|||,C|upstream_gene_variant|MODIFIER||Zm00001d037465|Transcript|Zm00001d037465_T002|protein_coding|||||||||||237|-1|||,C|upstream_gene_variant|MODIFIER||Zm00001d037465|Transcript|Zm00001d037465_T003|protein_coding|||||||||||237|-1|||,C|upstream…	1/1	0/0	0/0	0/0	0/0	0/0	0/0	0/1	0/0	0/1	0/0	0/0	0/0	0/0	0/0	0/0	0/0	0/0	0/0	0/0	0/0	0/0	0/0	0/0	0/0	0/0	0/0	0/0	1/1	0/0	0/0	0/0	0/0	0/0	0/0	0/0	0/0	0/0	0/0	0/0	0/0	0/0	0/0	0/0
6	126152206	SNP-6-126152206	T	C	AC=104;AF=0.813;AN=128;CSQ=C|upstream_gene_variant|MODIFIER||Zm00001d037465|Transcript|Zm00001d037465_T001|protein_coding|||||||||||855|-1|||,C|upstream_gene_variant|MODIFIER||Zm00001d037465|Transcript|Zm00001d037465_T002|protein_coding|||||||||||248|-1|||,C|upstream_gene_variant|MODIFIER||Zm00001d037465|Transcript|Zm00001d037465_T003|protein_coding|||||||||||248|-1|||,C|upstream_gene_variant|MOD…	1/1	1/1	1/1	0/0	1/1	1/1	0/0	1/1	1/1	1/1	1/1	1/1	1/1	1/1	1/1	1/1	1/1	./.	1/1	./.	0/0	1/1	1/1	0/0	0/0	0/0	1/1	./.	./.	1/1	1/1	1/1	1/1	1/1	./.	./.	1/1	./.	1/1	1/1	1/1	1/1	1/1	0/0
6	126152217	SNP-6-126152217	C	T	AC=16;AF=0.107;AN=150;BaseQRankSum=0;CSQ=T|upstream_gene_variant|MODIFIER||Zm00001d037465|Transcript|Zm00001d037465_T001|protein_coding|||||||||||866|-1|||,T|upstream_gene_variant|MODIFIER||Zm00001d037465|Transcript|Zm00001d037465_T002|protein_coding|||||||||||259|-1|||,T|upstream_gene_variant|MODIFIER||Zm00001d037465|Transcript|Zm00001d037465_T003|protein_coding|||||||||||259|-1|||,T|upstream_ge…	1/1	0/0	0/0	0/0	0/0	0/0	0/0	0/1	0/0	0/1	0/0	0/0	0/0	0/0	0/0	0/0	0/0	0/0	0/0	./.	0/0	0/0	0/0	0/0	0/0	0/0	0/0	0/0	./.	0/0	0/0	0/0	0/0	0/0	0/0	0/0	0/0	0/0	0/0	0/0	0/0	0/0	0/0	0/0
6	126152271	INS-6-126152271	C	CAT	AC=64;AF=0.427;AN=150;CSQ=AT|upstream_gene_variant|MODIFIER||Zm00001d037465|Transcript|Zm00001d037465_T001|protein_coding|||||||||||920|-1|||,AT|upstream_gene_variant|MODIFIER||Zm00001d037465|Transcript|Zm00001d037465_T002|protein_coding|||||||||||313|-1|||,AT|upstream_gene_variant|MODIFIER||Zm00001d037465|Transcript|Zm00001d037465_T003|protein_coding|||||||||||313|-1|||,AT|upstream_gene_variant|…	1/1	0/0	1/1	0/0	1/1	0/0	0/0	1/1	0/0	1/1	0/0	0/0	0/0	1/1	1/1	1/1	0/0	0/0	0/0	1/1	0/0	1/1	1/1	0/0	0/0	0/0	1/1	0/0	0/0	1/1	0/0	0/0	1/1	1/1	0/0	./.	0/0	0/0	1/1	./.	1/1	0/0	1/1	0/0
6	126152301	SNP-6-126152301	C	T	AC=11;AF=0.075;AN=146;BaseQRankSum=-0.842;CSQ=T|upstream_gene_variant|MODIFIER||Zm00001d037465|Transcript|Zm00001d037465_T001|protein_coding|||||||||||950|-1|||,T|upstream_gene_variant|MODIFIER||Zm00001d037465|Transcript|Zm00001d037465_T002|protein_coding|||||||||||343|-1|||,T|upstream_gene_variant|MODIFIER||Zm00001d037465|Transcript|Zm00001d037465_T003|protein_coding|||||||||||343|-1|||,T|upstre…	1/1	0/0	0/0	0/0	0/0	0/0	0/0	0/0	0/0	1/1	0/0	0/0	0/0	0/0	0/0	0/0	0/0	0/0	0/0	0/0	0/0	0/0	0/0	0/0	0/0	0/0	0/0	0/0	./.	0/0	0/0	0/0	0/0	0/1	0/0	0/0	0/0	0/0	0/0	0/0	0/0	0/0	0/0	0/0
6	126152396	DEL-6-126152396	TTAGG	T	AC=122;AF=0.836;AN=146;CSQ=-|upstream_gene_variant|MODIFIER||Zm00001d037465|Transcript|Zm00001d037465_T001|protein_coding|||||||||||1046|-1|||,-|upstream_gene_variant|MODIFIER||Zm00001d037465|Transcript|Zm00001d037465_T002|protein_coding|||||||||||439|-1|||,-|upstream_gene_variant|MODIFIER||Zm00001d037465|Transcript|Zm00001d037465_T003|protein_coding|||||||||||439|-1|||,-|upstream_gene_variant|MO…	1/1	./.	1/1	0/0	1/1	1/1	0/0	1/1	1/1	1/1	1/1	1/1	1/1	1/1	./.	1/1	1/1	1/1	1/1	1/1	0/0	1/1	1/1	0/0	0/0	./.	1/1	1/1	1/1	1/1	./.	1/1	1/1	1/1	1/1	1/1	1/1	./.	1/1	1/1	./.	1/1	1/1	0/0
6	126152419	SNP-6-126152419	A	T	AC=124;AF=0.838;AN=148;CSQ=T|upstream_gene_variant|MODIFIER||Zm00001d037465|Transcript|Zm00001d037465_T001|protein_coding|||||||||||1068|-1|||,T|upstream_gene_variant|MODIFIER||Zm00001d037465|Transcript|Zm00001d037465_T002|protein_coding|||||||||||461|-1|||,T|upstream_gene_variant|MODIFIER||Zm00001d037465|Transcript|Zm00001d037465_T003|protein_coding|||||||||||461|-1|||,T|upstream_gene_variant|MO…	1/1	./.	1/1	0/0	1/1	1/1	0/0	1/1	1/1	1/1	1/1	1/1	1/1	1/1	./.	1/1	1/1	1/1	1/1	1/1	0/0	1/1	1/1	0/0	0/0	./.	1/1	1/1	1/1	1/1	./.	1/1	1/1	1/1	1/1	1/1	1/1	1/1	1/1	1/1	./.	1/1	1/1	0/0
6	126152505	SNP-6-126152505	G	A	AC=20;AF=0.127;AN=158;BaseQRankSum=0.967;CSQ=A|upstream_gene_variant|MODIFIER||Zm00001d037465|Transcript|Zm00001d037465_T001|protein_coding|||||||||||1154|-1|||,A|upstream_gene_variant|MODIFIER||Zm00001d037465|Transcript|Zm00001d037465_T002|protein_coding|||||||||||547|-1|||,A|upstream_gene_variant|MODIFIER||Zm00001d037465|Transcript|Zm00001d037465_T003|protein_coding|||||||||||547|-1|||,A|upstre…	1/1	0/0	0/0	0/0	0/0	0/0	0/0	0/0	0/0	0/1	0/0	0/0	0/0	./.	0/0	0/0	0/0	0/0	0/0	0/0	0/0	0/0	0/0	0/0	0/0	0/0	0/0	0/0	0/1	0/0	0/0	0/0	0/0	0/0	0/0	0/0	0/0	0/0	0/0	0/0	0/0	0/0	0/0	0/0
6	126152508	SNP-6-126152508	T	A	AC=20;AF=0.127;AN=158;BaseQRankSum=0.447;CSQ=A|upstream_gene_variant|MODIFIER||Zm00001d037465|Transcript|Zm00001d037465_T001|protein_coding|||||||||||1157|-1|||,A|upstream_gene_variant|MODIFIER||Zm00001d037465|Transcript|Zm00001d037465_T002|protein_coding|||||||||||550|-1|||,A|upstream_gene_variant|MODIFIER||Zm00001d037465|Transcript|Zm00001d037465_T003|protein_coding|||||||||||550|-1|||,A|upstre…	1/1	0/0	0/0	0/0	0/0	0/0	0/0	0/0	0/0	0/1	0/0	0/0	0/0	./.	0/0	0/0	0/0	0/0	0/0	0/0	0/0	0/0	0/0	0/0	0/0	0/0	0/0	0/0	0/1	0/0	0/0	0/0	0/0	0/0	0/0	0/0	0/0	0/0	0/0	0/0	0/0	0/0	0/0	0/0
6	126152519	SNP-6-126152519	T	G	AC=20;AF=0.125;AN=160;BaseQRankSum=2.1;CSQ=G|upstream_gene_variant|MODIFIER||Zm00001d037465|Transcript|Zm00001d037465_T001|protein_coding|||||||||||1168|-1|||,G|upstream_gene_variant|MODIFIER||Zm00001d037465|Transcript|Zm00001d037465_T002|protein_coding|||||||||||561|-1|||,G|upstream_gene_variant|MODIFIER||Zm00001d037465|Transcript|Zm00001d037465_T003|protein_coding|||||||||||561|-1|||,G|upstream…	1/1	0/0	0/0	0/0	0/0	0/0	0/0	0/0	0/0	0/1	0/0	0/0	0/0	0/0	0/0	0/0	0/0	0/0	0/0	0/0	0/0	0/0	0/0	0/0	0/0	0/0	0/0	0/0	0/1	0/0	0/0	0/0	0/0	0/0	0/0	0/0	0/0	0/0	0/0	0/0	0/0	0/0	0/0	0/0
6	126152547	SNP-6-126152547	T	C	AC=130;AF=0.833;AN=156;CSQ=C|upstream_gene_variant|MODIFIER||Zm00001d037465|Transcript|Zm00001d037465_T001|protein_coding|||||||||||1196|-1|||,C|upstream_gene_variant|MODIFIER||Zm00001d037465|Transcript|Zm00001d037465_T002|protein_coding|||||||||||589|-1|||,C|upstream_gene_variant|MODIFIER||Zm00001d037465|Transcript|Zm00001d037465_T003|protein_coding|||||||||||589|-1|||,C|upstream_gene_variant|MO…	1/1	./.	1/1	0/0	1/1	1/1	0/0	1/1	1/1	1/1	1/1	1/1	1/1	1/1	1/1	1/1	1/1	1/1	1/1	1/1	0/0	1/1	1/1	0/0	0/0	0/0	./.	1/1	1/1	1/1	1/1	1/1	1/1	1/1	1/1	1/1	1/1	1/1	1/1	1/1	1/1	1/1	1/1	0/0
6	126152568	SNP-6-126152568	T	C	AC=108;AF=0.692;AN=156;BaseQRankSum=2.26;CSQ=C|upstream_gene_variant|MODIFIER||Zm00001d037465|Transcript|Zm00001d037465_T001|protein_coding|||||||||||1217|-1|||,C|upstream_gene_variant|MODIFIER||Zm00001d037465|Transcript|Zm00001d037465_T002|protein_coding|||||||||||610|-1|||,C|upstream_gene_variant|MODIFIER||Zm00001d037465|Transcript|Zm00001d037465_T003|protein_coding|||||||||||610|-1|||,C|upstre…	0/0	./.	1/1	0/0	1/1	1/1	0/0	0/1	1/1	0/1	1/1	1/1	1/1	1/1	1/1	1/1	1/1	1/1	1/1	1/1	0/0	1/1	1/1	0/0	0/0	0/0	./.	1/1	0/0	1/1	1/1	1/1	1/1	1/1	1/1	1/1	1/1	1/1	1/1	1/1	1/1	1/1	1/1	0/0
6	126152569	SNP-6-126152569	T	C	AC=130;AF=0.833;AN=156;CSQ=C|upstream_gene_variant|MODIFIER||Zm00001d037465|Transcript|Zm00001d037465_T001|protein_coding|||||||||||1218|-1|||,C|upstream_gene_variant|MODIFIER||Zm00001d037465|Transcript|Zm00001d037465_T002|protein_coding|||||||||||611|-1|||,C|upstream_gene_variant|MODIFIER||Zm00001d037465|Transcript|Zm00001d037465_T003|protein_coding|||||||||||611|-1|||,C|upstream_gene_variant|MO…	1/1	./.	1/1	0/0	1/1	1/1	0/0	1/1	1/1	1/1	1/1	1/1	1/1	1/1	1/1	1/1	1/1	1/1	1/1	1/1	0/0	1/1	1/1	0/0	0/0	0/0	./.	1/1	1/1	1/1	1/1	1/1	1/1	1/1	1/1	1/1	1/1	1/1	1/1	1/1	1/1	1/1	1/1	0/0
6	126152595	SNP-6-126152595	G	A	AC=22;AF=0.138;AN=160;BaseQRankSum=-0.732;CSQ=A|upstream_gene_variant|MODIFIER||Zm00001d037465|Transcript|Zm00001d037465_T001|protein_coding|||||||||||1244|-1|||,A|upstream_gene_variant|MODIFIER||Zm00001d037465|Transcript|Zm00001d037465_T002|protein_coding|||||||||||637|-1|||,A|upstream_gene_variant|MODIFIER||Zm00001d037465|Transcript|Zm00001d037465_T003|protein_coding|||||||||||637|-1|||,A|upstr…	1/1	0/0	0/0	0/0	0/0	0/0	0/0	0/1	0/0	0/1	0/0	0/0	0/0	0/0	0/0	0/0	0/0	0/0	0/0	0/0	0/0	0/0	0/0	0/0	0/0	0/0	0/0	0/0	1/1	0/0	0/0	0/0	0/0	0/0	0/0	0/0	0/0	0/0	0/0	0/0	0/0	0/0	0/0	0/0
6	126152607	INS-6-126152607	G	GTTGAACTTAGT	AC=22;AF=0.138;AN=160;BaseQRankSum=0;CSQ=TTGAACTTAGT|upstream_gene_variant|MODIFIER||Zm00001d037465|Transcript|Zm00001d037465_T001|protein_coding|||||||||||1256|-1|||,TTGAACTTAGT|upstream_gene_variant|MODIFIER||Zm00001d037465|Transcript|Zm00001d037465_T002|protein_coding|||||||||||649|-1|||,TTGAACTTAGT|upstream_gene_variant|MODIFIER||Zm00001d037465|Transcript|Zm00001d037465_T003|protein_coding|||…	1/1	0/0	0/0	0/0	0/0	0/0	0/0	0/1	0/0	0/1	0/0	0/0	0/0	0/0	0/0	0/0	0/0	0/0	0/0	0/0	0/0	0/0	0/0	0/0	0/0	0/0	0/0	0/0	1/1	0/0	0/0	0/0	0/0	0/0	0/0	0/0	0/0	0/0	0/0	0/0	0/0	0/0	0/0	0/0
6	126152635	SNP-6-126152635	T	C	AC=104;AF=0.684;AN=152;BaseQRankSum=0.842;CSQ=C|upstream_gene_variant|MODIFIER||Zm00001d037465|Transcript|Zm00001d037465_T001|protein_coding|||||||||||1284|-1|||,C|upstream_gene_variant|MODIFIER||Zm00001d037465|Transcript|Zm00001d037465_T002|protein_coding|||||||||||677|-1|||,C|upstream_gene_variant|MODIFIER||Zm00001d037465|Transcript|Zm00001d037465_T003|protein_coding|||||||||||677|-1|||,C|upstr…	0/0	1/1	./.	0/0	1/1	1/1	0/0	0/1	1/1	0/1	1/1	1/1	1/1	1/1	1/1	1/1	1/1	./.	1/1	1/1	0/0	1/1	1/1	0/0	0/0	0/0	1/1	1/1	0/0	1/1	1/1	1/1	1/1	1/1	1/1	1/1	1/1	1/1	1/1	1/1	1/1	1/1	1/1	0/0
6	126152658	SNP-6-126152658	T	C	AC=120;AF=0.822;AN=146;CSQ=C|upstream_gene_variant|MODIFIER||Zm00001d037465|Transcript|Zm00001d037465_T001|protein_coding|||||||||||1307|-1|||,C|upstream_gene_variant|MODIFIER||Zm00001d037465|Transcript|Zm00001d037465_T002|protein_coding|||||||||||700|-1|||,C|upstream_gene_variant|MODIFIER||Zm00001d037465|Transcript|Zm00001d037465_T003|protein_coding|||||||||||700|-1|||,C|upstream_gene_variant|MO…	1/1	1/1	./.	0/0	1/1	1/1	0/0	1/1	1/1	1/1	1/1	1/1	1/1	1/1	1/1	1/1	1/1	./.	1/1	1/1	0/0	./.	1/1	0/0	0/0	0/0	1/1	1/1	1/1	1/1	1/1	1/1	1/1	1/1	1/1	1/1	1/1	1/1	1/1	1/1	./.	1/1	1/1	0/0
6	126152659	SNP-6-126152659	C	T	AC=120;AF=0.822;AN=146;CSQ=T|upstream_gene_variant|MODIFIER||Zm00001d037465|Transcript|Zm00001d037465_T001|protein_coding|||||||||||1308|-1|||,T|upstream_gene_variant|MODIFIER||Zm00001d037465|Transcript|Zm00001d037465_T002|protein_coding|||||||||||701|-1|||,T|upstream_gene_variant|MODIFIER||Zm00001d037465|Transcript|Zm00001d037465_T003|protein_coding|||||||||||701|-1|||,T|upstream_gene_variant|MO…	1/1	1/1	./.	0/0	1/1	1/1	0/0	1/1	1/1	1/1	1/1	1/1	1/1	1/1	1/1	1/1	1/1	./.	1/1	1/1	0/0	./.	1/1	0/0	0/0	0/0	1/1	1/1	1/1	1/1	1/1	1/1	1/1	1/1	1/1	1/1	1/1	1/1	1/1	1/1	./.	1/1	1/1	0/0
6	126152668	SNP-6-126152668	C	A	AC=21;AF=0.135;AN=156;BaseQRankSum=0;CSQ=A|upstream_gene_variant|MODIFIER||Zm00001d037465|Transcript|Zm00001d037465_T001|protein_coding|||||||||||1317|-1|||,A|upstream_gene_variant|MODIFIER||Zm00001d037465|Transcript|Zm00001d037465_T002|protein_coding|||||||||||710|-1|||,A|upstream_gene_variant|MODIFIER||Zm00001d037465|Transcript|Zm00001d037465_T003|protein_coding|||||||||||710|-1|||,A|upstream_g…	1/1	0/0	0/0	0/0	0/0	0/0	0/0	0/1	0/0	0/1	0/0	0/0	0/0	0/0	0/0	0/0	0/0	0/0	0/0	0/0	0/0	0/0	0/0	0/0	0/0	0/0	0/0	0/0	1/1	0/0	0/0	0/0	0/0	0/1	0/0	0/0	0/0	0/0	0/0	0/0	0/0	0/0	0/0	0/0
6	126152704	SNP-6-126152704	A	G	AC=54;AF=0.346;AN=156;CSQ=G|upstream_gene_variant|MODIFIER||Zm00001d037465|Transcript|Zm00001d037465_T001|protein_coding|||||||||||1353|-1|||,G|upstream_gene_variant|MODIFIER||Zm00001d037465|Transcript|Zm00001d037465_T002|protein_coding|||||||||||746|-1|||,G|upstream_gene_variant|MODIFIER||Zm00001d037465|Transcript|Zm00001d037465_T003|protein_coding|||||||||||746|-1|||,G|upstream_gene_variant|MOD…	0/0	0/0	0/0	0/0	0/0	1/1	0/0	0/0	0/0	./.	1/1	1/1	1/1	0/0	0/0	0/0	1/1	0/0	1/1	0/0	0/0	0/0	1/1	0/0	0/0	0/0	0/0	0/0	0/0	0/0	1/1	1/1	0/0	0/0	1/1	1/1	1/1	1/1	0/0	1/1	1/1	0/0	0/0	0/0
6	126152712	SNP-6-126152712	C	T	AC=130;AF=0.833;AN=156;CSQ=T|upstream_gene_variant|MODIFIER||Zm00001d037465|Transcript|Zm00001d037465_T001|protein_coding|||||||||||1361|-1|||,T|upstream_gene_variant|MODIFIER||Zm00001d037465|Transcript|Zm00001d037465_T002|protein_coding|||||||||||754|-1|||,T|upstream_gene_variant|MODIFIER||Zm00001d037465|Transcript|Zm00001d037465_T003|protein_coding|||||||||||754|-1|||,T|upstream_gene_variant|MO…	1/1	1/1	1/1	0/0	1/1	1/1	0/0	1/1	1/1	1/1	1/1	1/1	1/1	1/1	1/1	./.	1/1	1/1	1/1	1/1	0/0	1/1	1/1	0/0	0/0	0/0	1/1	1/1	1/1	1/1	1/1	1/1	1/1	1/1	1/1	1/1	1/1	1/1	1/1	1/1	1/1	1/1	1/1	0/0
6	126152735	SNP-6-126152735	C	T	AC=107;AF=0.686;AN=156;BaseQRankSum=0.842;CSQ=T|upstream_gene_variant|MODIFIER||Zm00001d037465|Transcript|Zm00001d037465_T001|protein_coding|||||||||||1384|-1|||,T|upstream_gene_variant|MODIFIER||Zm00001d037465|Transcript|Zm00001d037465_T002|protein_coding|||||||||||777|-1|||,T|upstream_gene_variant|MODIFIER||Zm00001d037465|Transcript|Zm00001d037465_T003|protein_coding|||||||||||777|-1|||,T|upstr…	0/0	1/1	1/1	0/0	1/1	1/1	0/0	1/1	1/1	0/0	1/1	1/1	1/1	1/1	1/1	./.	1/1	1/1	1/1	1/1	0/0	1/1	1/1	0/0	0/0	0/0	1/1	1/1	0/0	1/1	1/1	1/1	1/1	0/1	1/1	1/1	1/1	1/1	1/1	1/1	1/1	1/1	1/1	0/0
6	126152755	SNP-6-126152755	G	A	AC=105;AF=0.665;AN=158;CSQ=A|upstream_gene_variant|MODIFIER||Zm00001d037465|Transcript|Zm00001d037465_T001|protein_coding|||||||||||1404|-1|||,A|upstream_gene_variant|MODIFIER||Zm00001d037465|Transcript|Zm00001d037465_T002|protein_coding|||||||||||797|-1|||,A|upstream_gene_variant|MODIFIER||Zm00001d037465|Transcript|Zm00001d037465_T003|protein_coding|||||||||||797|-1|||,A|upstream_gene_variant|MO…	0/0	1/1	1/1	0/0	1/1	1/1	0/0	1/1	1/1	0/0	1/1	1/1	1/1	1/1	1/1	./.	1/1	1/1	1/1	1/1	0/0	1/1	1/1	0/0	0/0	0/0	1/1	1/1	0/0	1/1	0/0	1/1	1/1	0/1	1/1	1/1	1/1	1/1	1/1	1/1	1/1	1/1	1/1	0/0
6	126152784	INS-6-126152784	A	AT	AC=17;AF=0.109;AN=156;BaseQRankSum=0;CSQ=T|upstream_gene_variant|MODIFIER||Zm00001d037465|Transcript|Zm00001d037465_T001|protein_coding|||||||||||1433|-1|||,T|upstream_gene_variant|MODIFIER||Zm00001d037465|Transcript|Zm00001d037465_T002|protein_coding|||||||||||826|-1|||,T|upstream_gene_variant|MODIFIER||Zm00001d037465|Transcript|Zm00001d037465_T003|protein_coding|||||||||||826|-1|||,T|upstream_g…	1/1	0/0	0/0	0/0	0/0	0/0	0/0	0/0	0/0	0/1	0/0	0/0	0/0	0/0	0/0	0/0	0/0	0/0	0/0	0/0	0/0	0/0	0/0	0/0	0/0	0/0	0/0	0/0	1/1	0/0	0/0	0/0	0/0	0/0	0/0	0/0	0/0	0/0	0/0	0/0	0/0	0/0	0/0	0/0
6	126152812	DEL-6-126152812	GA	G	AC=17;AF=0.11;AN=154;BaseQRankSum=0;CSQ=-|upstream_gene_variant|MODIFIER||Zm00001d037465|Transcript|Zm00001d037465_T001|protein_coding|||||||||||1462|-1|||,-|upstream_gene_variant|MODIFIER||Zm00001d037465|Transcript|Zm00001d037465_T002|protein_coding|||||||||||855|-1|||,-|upstream_gene_variant|MODIFIER||Zm00001d037465|Transcript|Zm00001d037465_T003|protein_coding|||||||||||855|-1|||,-|upstream_ge…	1/1	0/0	0/0	0/0	0/0	0/0	0/0	0/0	0/0	0/1	0/0	0/0	0/0	0/0	0/0	0/0	0/0	./.	0/0	0/0	0/0	0/0	0/0	0/0	0/0	0/0	0/0	0/0	1/1	0/0	0/0	0/0	0/0	0/0	0/0	0/0	0/0	0/0	0/0	0/0	0/0	0/0	0/0	0/0
6	126152825	SNP-6-126152825	T	G	AC=121;AF=0.818;AN=148;BaseQRankSum=0.674;CSQ=G|upstream_gene_variant|MODIFIER||Zm00001d037465|Transcript|Zm00001d037465_T001|protein_coding|||||||||||1474|-1|||,G|upstream_gene_variant|MODIFIER||Zm00001d037465|Transcript|Zm00001d037465_T002|protein_coding|||||||||||867|-1|||,G|upstream_gene_variant|MODIFIER||Zm00001d037465|Transcript|Zm00001d037465_T003|protein_coding|||||||||||867|-1|||,G|upstr…	1/1	1/1	1/1	0/0	1/1	1/1	0/0	1/1	1/1	1/1	1/1	1/1	./.	1/1	1/1	1/1	1/1	./.	1/1	1/1	0/0	1/1	1/1	0/0	0/0	0/0	1/1	1/1	1/1	1/1	1/1	1/1	1/1	0/1	1/1	1/1	1/1	1/1	1/1	1/1	1/1	1/1	1/1	0/0
6	126152844	SNP-6-126152844	T	C	AC=124;AF=0.827;AN=150;CSQ=C|upstream_gene_variant|MODIFIER||Zm00001d037465|Transcript|Zm00001d037465_T001|protein_coding|||||||||||1493|-1|||,C|upstream_gene_variant|MODIFIER||Zm00001d037465|Transcript|Zm00001d037465_T002|protein_coding|||||||||||886|-1|||,C|upstream_gene_variant|MODIFIER||Zm00001d037465|Transcript|Zm00001d037465_T003|protein_coding|||||||||||886|-1|||,C|upstream_gene_variant|MO…	1/1	1/1	1/1	0/0	1/1	1/1	0/0	1/1	1/1	1/1	1/1	1/1	./.	1/1	1/1	1/1	1/1	./.	1/1	1/1	0/0	1/1	1/1	0/0	0/0	0/0	1/1	1/1	1/1	1/1	1/1	1/1	1/1	1/1	1/1	1/1	1/1	1/1	1/1	1/1	1/1	1/1	1/1	0/0
6	126152857	SNP-6-126152857	A	G	AC=128;AF=0.831;AN=154;CSQ=G|upstream_gene_variant|MODIFIER||Zm00001d037465|Transcript|Zm00001d037465_T001|protein_coding|||||||||||1506|-1|||,G|upstream_gene_variant|MODIFIER||Zm00001d037465|Transcript|Zm00001d037465_T002|protein_coding|||||||||||899|-1|||,G|upstream_gene_variant|MODIFIER||Zm00001d037465|Transcript|Zm00001d037465_T003|protein_coding|||||||||||899|-1|||,G|upstream_gene_variant|MO…	1/1	1/1	1/1	0/0	1/1	1/1	0/0	1/1	1/1	1/1	1/1	1/1	1/1	1/1	1/1	1/1	1/1	1/1	1/1	1/1	0/0	1/1	1/1	0/0	0/0	0/0	1/1	1/1	1/1	1/1	1/1	1/1	1/1	1/1	1/1	1/1	1/1	1/1	1/1	1/1	1/1	1/1	1/1	0/0
6	126152877	SNP-6-126152877	T	C	AC=126;AF=0.829;AN=152;CSQ=C|upstream_gene_variant|MODIFIER||Zm00001d037465|Transcript|Zm00001d037465_T001|protein_coding|||||||||||1526|-1|||,C|upstream_gene_variant|MODIFIER||Zm00001d037465|Transcript|Zm00001d037465_T002|protein_coding|||||||||||919|-1|||,C|upstream_gene_variant|MODIFIER||Zm00001d037465|Transcript|Zm00001d037465_T003|protein_coding|||||||||||919|-1|||,C|upstream_gene_variant|MO…	1/1	1/1	1/1	0/0	1/1	1/1	0/0	1/1	1/1	1/1	1/1	1/1	1/1	1/1	1/1	1/1	1/1	1/1	1/1	1/1	0/0	1/1	1/1	0/0	0/0	0/0	1/1	1/1	1/1	1/1	1/1	1/1	1/1	1/1	1/1	1/1	1/1	1/1	1/1	1/1	1/1	1/1	1/1	0/0
6	126152884	SNP-6-126152884	C	G	AC=126;AF=0.829;AN=152;CSQ=G|upstream_gene_variant|MODIFIER||Zm00001d037465|Transcript|Zm00001d037465_T001|protein_coding|||||||||||1533|-1|||,G|upstream_gene_variant|MODIFIER||Zm00001d037465|Transcript|Zm00001d037465_T002|protein_coding|||||||||||926|-1|||,G|upstream_gene_variant|MODIFIER||Zm00001d037465|Transcript|Zm00001d037465_T003|protein_coding|||||||||||926|-1|||,G|upstream_gene_variant|MO…	1/1	1/1	1/1	0/0	1/1	1/1	0/0	1/1	1/1	1/1	1/1	1/1	1/1	1/1	1/1	1/1	1/1	1/1	1/1	1/1	0/0	1/1	1/1	0/0	0/0	0/0	1/1	1/1	1/1	1/1	1/1	1/1	1/1	1/1	1/1	1/1	1/1	1/1	1/1	1/1	1/1	1/1	1/1	0/0
6	126152896	SNP-6-126152896	T	A	AC=124;AF=0.827;AN=150;CSQ=A|upstream_gene_variant|MODIFIER||Zm00001d037465|Transcript|Zm00001d037465_T001|protein_coding|||||||||||1545|-1|||,A|upstream_gene_variant|MODIFIER||Zm00001d037465|Transcript|Zm00001d037465_T002|protein_coding|||||||||||938|-1|||,A|upstream_gene_variant|MODIFIER||Zm00001d037465|Transcript|Zm00001d037465_T003|protein_coding|||||||||||938|-1|||,A|upstream_gene_variant|MO…	./.	1/1	1/1	0/0	1/1	1/1	0/0	1/1	1/1	1/1	1/1	1/1	1/1	1/1	1/1	1/1	1/1	1/1	1/1	1/1	0/0	1/1	1/1	0/0	0/0	0/0	1/1	1/1	1/1	1/1	1/1	1/1	1/1	1/1	1/1	1/1	1/1	1/1	1/1	1/1	1/1	1/1	1/1	0/0
6	126152904	SNP-6-126152904	G	A	AC=124;AF=0.827;AN=150;CSQ=A|upstream_gene_variant|MODIFIER||Zm00001d037465|Transcript|Zm00001d037465_T001|protein_coding|||||||||||1553|-1|||,A|upstream_gene_variant|MODIFIER||Zm00001d037465|Transcript|Zm00001d037465_T002|protein_coding|||||||||||946|-1|||,A|upstream_gene_variant|MODIFIER||Zm00001d037465|Transcript|Zm00001d037465_T003|protein_coding|||||||||||946|-1|||,A|upstream_gene_variant|MO…	./.	1/1	1/1	0/0	1/1	1/1	0/0	1/1	1/1	1/1	1/1	1/1	1/1	1/1	1/1	1/1	1/1	1/1	1/1	1/1	0/0	1/1	1/1	0/0	0/0	0/0	1/1	1/1	1/1	1/1	1/1	1/1	1/1	1/1	1/1	1/1	1/1	1/1	1/1	1/1	1/1	1/1	1/1	0/0
6	126152917	SNP-6-126152917	A	G	AC=110;AF=0.775;AN=142;CSQ=G|upstream_gene_variant|MODIFIER||Zm00001d037465|Transcript|Zm00001d037465_T001|protein_coding|||||||||||1566|-1|||,G|upstream_gene_variant|MODIFIER||Zm00001d037465|Transcript|Zm00001d037465_T002|protein_coding|||||||||||959|-1|||,G|upstream_gene_variant|MODIFIER||Zm00001d037465|Transcript|Zm00001d037465_T003|protein_coding|||||||||||959|-1|||,G|upstream_gene_variant|MO…	./.	1/1	1/1	0/0	1/1	1/1	0/0	1/1	1/1	./.	1/1	1/1	1/1	1/1	1/1	1/1	1/1	1/1	1/1	1/1	0/0	1/1	1/1	0/0	0/0	0/0	1/1	1/1	0/0	1/1	1/1	1/1	1/1	1/1	1/1	1/1	1/1	1/1	1/1	1/1	1/1	1/1	1/1	0/0
6	126152968	SNP-6-126152968	A	G	AC=116;AF=0.817;AN=142;CSQ=G|upstream_gene_variant|MODIFIER||Zm00001d037465|Transcript|Zm00001d037465_T001|protein_coding|||||||||||1617|-1|||,G|upstream_gene_variant|MODIFIER||Zm00001d037465|Transcript|Zm00001d037465_T002|protein_coding|||||||||||1010|-1|||,G|upstream_gene_variant|MODIFIER||Zm00001d037465|Transcript|Zm00001d037465_T003|protein_coding|||||||||||1010|-1|||,G|upstream_gene_variant|…	1/1	1/1	1/1	0/0	1/1	1/1	0/0	1/1	./.	./.	1/1	1/1	1/1	1/1	1/1	1/1	1/1	1/1	1/1	1/1	0/0	1/1	1/1	0/0	0/0	0/0	1/1	1/1	./.	1/1	1/1	1/1	1/1	1/1	1/1	1/1	1/1	1/1	1/1	1/1	1/1	1/1	1/1	0/0
6	126152978	SNP-6-126152978	G	A	AC=110;AF=0.753;AN=146;CSQ=A|upstream_gene_variant|MODIFIER||Zm00001d037465|Transcript|Zm00001d037465_T001|protein_coding|||||||||||1627|-1|||,A|upstream_gene_variant|MODIFIER||Zm00001d037465|Transcript|Zm00001d037465_T002|protein_coding|||||||||||1020|-1|||,A|upstream_gene_variant|MODIFIER||Zm00001d037465|Transcript|Zm00001d037465_T003|protein_coding|||||||||||1020|-1|||,A|upstream_gene_variant|…	0/0	1/1	1/1	0/0	1/1	1/1	0/0	1/1	./.	./.	1/1	1/1	1/1	1/1	1/1	1/1	1/1	1/1	1/1	1/1	0/0	1/1	1/1	0/0	0/0	0/0	1/1	1/1	./.	1/1	1/1	1/1	1/1	1/1	1/1	1/1	1/1	1/1	1/1	1/1	1/1	1/1	1/1	0/0
6	126152994	SNP-6-126152994	A	G	AC=124;AF=0.827;AN=150;CSQ=G|upstream_gene_variant|MODIFIER||Zm00001d037465|Transcript|Zm00001d037465_T001|protein_coding|||||||||||1643|-1|||,G|upstream_gene_variant|MODIFIER||Zm00001d037465|Transcript|Zm00001d037465_T002|protein_coding|||||||||||1036|-1|||,G|upstream_gene_variant|MODIFIER||Zm00001d037465|Transcript|Zm00001d037465_T003|protein_coding|||||||||||1036|-1|||,G|upstream_gene_variant|…	1/1	1/1	1/1	0/0	1/1	1/1	0/0	1/1	./.	./.	1/1	1/1	1/1	1/1	1/1	1/1	1/1	1/1	1/1	1/1	0/0	1/1	1/1	0/0	0/0	0/0	1/1	1/1	1/1	1/1	1/1	1/1	1/1	1/1	1/1	1/1	1/1	1/1	1/1	1/1	1/1	1/1	1/1	0/0
6	126153005	SNP-6-126153005	T	C	AC=122;AF=0.836;AN=146;CSQ=C|upstream_gene_variant|MODIFIER||Zm00001d037465|Transcript|Zm00001d037465_T001|protein_coding|||||||||||1654|-1|||,C|upstream_gene_variant|MODIFIER||Zm00001d037465|Transcript|Zm00001d037465_T002|protein_coding|||||||||||1047|-1|||,C|upstream_gene_variant|MODIFIER||Zm00001d037465|Transcript|Zm00001d037465_T003|protein_coding|||||||||||1047|-1|||,C|upstream_gene_variant|…	1/1	1/1	1/1	0/0	1/1	1/1	0/0	1/1	./.	./.	1/1	1/1	1/1	1/1	1/1	1/1	1/1	./.	1/1	1/1	0/0	1/1	1/1	0/0	./.	0/0	1/1	1/1	1/1	1/1	1/1	1/1	1/1	1/1	1/1	1/1	1/1	1/1	1/1	1/1	1/1	1/1	1/1	0/0
6	126153031	SNP-6-126153031	A	G	AC=105;AF=0.709;AN=148;BaseQRankSum=0.674;CSQ=G|upstream_gene_variant|MODIFIER||Zm00001d037465|Transcript|Zm00001d037465_T001|protein_coding|||||||||||1680|-1|||,G|upstream_gene_variant|MODIFIER||Zm00001d037465|Transcript|Zm00001d037465_T002|protein_coding|||||||||||1073|-1|||,G|upstream_gene_variant|MODIFIER||Zm00001d037465|Transcript|Zm00001d037465_T003|protein_coding|||||||||||1073|-1|||,G|ups…	0/0	1/1	1/1	0/0	1/1	1/1	0/0	1/1	./.	0/1	1/1	1/1	1/1	1/1	1/1	1/1	1/1	./.	1/1	1/1	0/0	1/1	1/1	0/0	0/0	0/0	1/1	1/1	0/0	1/1	1/1	1/1	1/1	1/1	1/1	1/1	1/1	1/1	1/1	1/1	1/1	1/1	1/1	0/0
6	126153039	SNP-6-126153039	G	A	AC=51;AF=0.34;AN=150;BaseQRankSum=-1.282;CSQ=A|upstream_gene_variant|MODIFIER||Zm00001d037465|Transcript|Zm00001d037465_T001|protein_coding|||||||||||1688|-1|||,A|upstream_gene_variant|MODIFIER||Zm00001d037465|Transcript|Zm00001d037465_T002|protein_coding|||||||||||1081|-1|||,A|upstream_gene_variant|MODIFIER||Zm00001d037465|Transcript|Zm00001d037465_T003|protein_coding|||||||||||1081|-1|||,A|upst…	0/0	0/0	0/0	0/0	0/0	1/1	0/0	0/0	0/0	0/0	1/1	1/1	1/1	0/0	0/0	0/0	1/1	./.	1/1	0/0	0/0	0/0	1/1	0/0	0/0	0/0	0/0	0/0	0/0	0/0	1/1	0/1	0/0	0/0	1/1	1/1	1/1	1/1	0/0	1/1	1/1	0/0	0/0	0/0
6	126153097	DEL-6-126153097	TG	T	AC=17;AF=0.109;AN=156;BaseQRankSum=0;CSQ=-|upstream_gene_variant|MODIFIER||Zm00001d037465|Transcript|Zm00001d037465_T001|protein_coding|||||||||||1747|-1|||,-|upstream_gene_variant|MODIFIER||Zm00001d037465|Transcript|Zm00001d037465_T002|protein_coding|||||||||||1140|-1|||,-|upstream_gene_variant|MODIFIER||Zm00001d037465|Transcript|Zm00001d037465_T003|protein_coding|||||||||||1140|-1|||,-|upstream…	1/1	0/0	0/0	0/0	0/0	0/0	0/0	0/0	0/0	0/1	0/0	0/0	0/0	0/0	0/0	0/0	0/0	0/0	0/0	0/0	0/0	0/0	0/0	0/0	0/0	0/0	0/0	0/0	1/1	0/0	0/0	0/0	0/0	0/0	0/0	0/0	0/0	0/0	0/0	0/0	0/0	0/0	0/0	0/0
6	126153117	INS-6-126153117	C	CA	AC=123;AF=0.82;AN=150;BaseQRankSum=0;CSQ=A|upstream_gene_variant|MODIFIER||Zm00001d037465|Transcript|Zm00001d037465_T001|protein_coding|||||||||||1766|-1|||,A|upstream_gene_variant|MODIFIER||Zm00001d037465|Transcript|Zm00001d037465_T002|protein_coding|||||||||||1159|-1|||,A|upstream_gene_variant|MODIFIER||Zm00001d037465|Transcript|Zm00001d037465_T003|protein_coding|||||||||||1159|-1|||,A|upstream…	1/1	1/1	1/1	0/0	1/1	1/1	0/0	1/1	./.	1/1	1/1	1/1	1/1	1/1	1/1	1/1	1/1	1/1	1/1	1/1	0/0	1/1	1/1	0/0	0/0	0/0	1/1	1/1	1/1	1/1	1/1	1/1	1/1	1/1	1/1	1/1	1/1	1/1	./.	1/1	1/1	1/1	1/1	0/0
6	126153128	SNP-6-126153128	G	T	AC=123;AF=0.82;AN=150;BaseQRankSum=-1.593;CSQ=T|upstream_gene_variant|MODIFIER||Zm00001d037465|Transcript|Zm00001d037465_T001|protein_coding|||||||||||1777|-1|||,T|upstream_gene_variant|MODIFIER||Zm00001d037465|Transcript|Zm00001d037465_T002|protein_coding|||||||||||1170|-1|||,T|upstream_gene_variant|MODIFIER||Zm00001d037465|Transcript|Zm00001d037465_T003|protein_coding|||||||||||1170|-1|||,T|ups…	1/1	1/1	1/1	0/0	1/1	1/1	0/0	1/1	./.	1/1	1/1	1/1	1/1	1/1	1/1	1/1	1/1	1/1	1/1	1/1	0/0	1/1	1/1	0/0	0/0	0/0	1/1	1/1	1/1	1/1	1/1	1/1	1/1	1/1	1/1	1/1	1/1	1/1	./.	1/1	1/1	1/1	1/1	0/0
6	126153177	SNP-6-126153177	A	G	AC=103;AF=0.687;AN=150;BaseQRankSum=0.887;CSQ=G|upstream_gene_variant|MODIFIER||Zm00001d037465|Transcript|Zm00001d037465_T001|protein_coding|||||||||||1826|-1|||,G|upstream_gene_variant|MODIFIER||Zm00001d037465|Transcript|Zm00001d037465_T002|protein_coding|||||||||||1219|-1|||,G|upstream_gene_variant|MODIFIER||Zm00001d037465|Transcript|Zm00001d037465_T003|protein_coding|||||||||||1219|-1|||,G|ups…	0/0	1/1	1/1	0/0	1/1	1/1	0/0	1/1	1/1	./.	1/1	1/1	1/1	1/1	1/1	1/1	1/1	1/1	1/1	1/1	0/0	1/1	1/1	0/0	0/0	0/0	1/1	1/1	0/0	./.	1/1	1/1	1/1	1/1	1/1	1/1	1/1	1/1	./.	1/1	1/1	1/1	1/1	0/0
6	126153227	SNP-6-126153227	C	T	AC=124;AF=0.838;AN=148;CSQ=T|upstream_gene_variant|MODIFIER||Zm00001d037465|Transcript|Zm00001d037465_T001|protein_coding|||||||||||1876|-1|||,T|upstream_gene_variant|MODIFIER||Zm00001d037465|Transcript|Zm00001d037465_T002|protein_coding|||||||||||1269|-1|||,T|upstream_gene_variant|MODIFIER||Zm00001d037465|Transcript|Zm00001d037465_T003|protein_coding|||||||||||1269|-1|||,T|upstream_gene_variant|…	1/1	1/1	1/1	0/0	1/1	1/1	0/0	1/1	1/1	1/1	1/1	1/1	1/1	1/1	1/1	1/1	1/1	1/1	1/1	1/1	0/0	1/1	./.	0/0	0/0	0/0	1/1	1/1	./.	1/1	1/1	1/1	1/1	./.	1/1	1/1	1/1	1/1	1/1	1/1	1/1	./.	1/1	0/0
6	126153242	SNP-6-126153242	T	G	AC=20;AF=0.13;AN=154;CSQ=G|upstream_gene_variant|MODIFIER||Zm00001d037465|Transcript|Zm00001d037465_T001|protein_coding|||||||||||1891|-1|||,G|upstream_gene_variant|MODIFIER||Zm00001d037465|Transcript|Zm00001d037465_T002|protein_coding|||||||||||1284|-1|||,G|upstream_gene_variant|MODIFIER||Zm00001d037465|Transcript|Zm00001d037465_T003|protein_coding|||||||||||1284|-1|||,G|upstream_gene_variant|MO…	0/0	0/0	0/0	0/0	0/0	0/0	0/0	0/0	0/0	0/0	0/0	0/0	0/0	1/1	0/0	0/0	0/0	1/1	0/0	0/0	0/0	0/0	0/0	0/0	0/0	0/0	1/1	0/0	./.	0/0	0/0	0/0	0/0	0/0	0/0	0/0	0/0	0/0	1/1	0/0	0/0	0/0	0/0	0/0
6	126153269	SNP-6-126153269	G	T	AC=18;AF=0.12;AN=150;CSQ=T|upstream_gene_variant|MODIFIER||Zm00001d037465|Transcript|Zm00001d037465_T001|protein_coding|||||||||||1918|-1|||,T|upstream_gene_variant|MODIFIER||Zm00001d037465|Transcript|Zm00001d037465_T002|protein_coding|||||||||||1311|-1|||,T|upstream_gene_variant|MODIFIER||Zm00001d037465|Transcript|Zm00001d037465_T003|protein_coding|||||||||||1311|-1|||,T|upstream_gene_variant|MO…	1/1	0/0	0/0	0/0	0/0	0/0	0/0	0/0	0/0	1/1	0/0	0/0	0/0	0/0	0/0	0/0	0/0	0/0	0/0	0/0	0/0	0/0	0/0	0/0	0/0	0/0	0/0	0/0	./.	0/0	0/0	0/0	0/0	0/0	0/0	0/0	0/0	0/0	0/0	0/0	0/0	0/0	0/0	0/0
6	126153280	SNP-6-126153280	A	G	AC=120;AF=0.822;AN=146;CSQ=G|upstream_gene_variant|MODIFIER||Zm00001d037465|Transcript|Zm00001d037465_T001|protein_coding|||||||||||1929|-1|||,G|upstream_gene_variant|MODIFIER||Zm00001d037465|Transcript|Zm00001d037465_T002|protein_coding|||||||||||1322|-1|||,G|upstream_gene_variant|MODIFIER||Zm00001d037465|Transcript|Zm00001d037465_T003|protein_coding|||||||||||1322|-1|||,G|upstream_gene_variant|…	1/1	1/1	1/1	0/0	1/1	1/1	0/0	1/1	1/1	1/1	1/1	1/1	1/1	1/1	1/1	1/1	1/1	1/1	1/1	1/1	0/0	1/1	1/1	0/0	0/0	0/0	1/1	1/1	./.	1/1	1/1	1/1	1/1	./.	1/1	1/1	1/1	1/1	./.	1/1	1/1	1/1	1/1	0/0
6	126153285	SNP-6-126153285	T	C	AC=120;AF=0.822;AN=146;CSQ=C|upstream_gene_variant|MODIFIER||Zm00001d037465|Transcript|Zm00001d037465_T001|protein_coding|||||||||||1934|-1|||,C|upstream_gene_variant|MODIFIER||Zm00001d037465|Transcript|Zm00001d037465_T002|protein_coding|||||||||||1327|-1|||,C|upstream_gene_variant|MODIFIER||Zm00001d037465|Transcript|Zm00001d037465_T003|protein_coding|||||||||||1327|-1|||,C|upstream_gene_variant|…	1/1	1/1	1/1	0/0	1/1	1/1	0/0	1/1	1/1	1/1	1/1	1/1	1/1	1/1	1/1	1/1	1/1	1/1	1/1	1/1	0/0	1/1	1/1	0/0	0/0	0/0	1/1	1/1	./.	1/1	1/1	1/1	1/1	./.	1/1	1/1	1/1	1/1	./.	1/1	1/1	1/1	1/1	0/0
6	126153302	SNP-6-126153302	A	G	AC=120;AF=0.822;AN=146;CSQ=G|upstream_gene_variant|MODIFIER||Zm00001d037465|Transcript|Zm00001d037465_T001|protein_coding|||||||||||1951|-1|||,G|upstream_gene_variant|MODIFIER||Zm00001d037465|Transcript|Zm00001d037465_T002|protein_coding|||||||||||1344|-1|||,G|upstream_gene_variant|MODIFIER||Zm00001d037465|Transcript|Zm00001d037465_T003|protein_coding|||||||||||1344|-1|||,G|upstream_gene_variant|…	1/1	1/1	1/1	0/0	1/1	1/1	0/0	1/1	1/1	1/1	1/1	1/1	1/1	1/1	1/1	1/1	1/1	1/1	1/1	1/1	0/0	1/1	1/1	0/0	0/0	0/0	1/1	1/1	./.	1/1	1/1	1/1	1/1	./.	1/1	1/1	1/1	1/1	./.	1/1	1/1	1/1	1/1	0/0
6	126153304	SNP-6-126153304	C	T	AC=120;AF=0.822;AN=146;CSQ=T|upstream_gene_variant|MODIFIER||Zm00001d037465|Transcript|Zm00001d037465_T001|protein_coding|||||||||||1953|-1|||,T|upstream_gene_variant|MODIFIER||Zm00001d037465|Transcript|Zm00001d037465_T002|protein_coding|||||||||||1346|-1|||,T|upstream_gene_variant|MODIFIER||Zm00001d037465|Transcript|Zm00001d037465_T003|protein_coding|||||||||||1346|-1|||,T|upstream_gene_variant|…	1/1	1/1	1/1	0/0	1/1	1/1	0/0	1/1	1/1	1/1	1/1	1/1	1/1	1/1	1/1	1/1	1/1	1/1	1/1	1/1	0/0	1/1	1/1	0/0	0/0	0/0	1/1	1/1	./.	1/1	1/1	1/1	1/1	./.	1/1	1/1	1/1	1/1	./.	1/1	1/1	1/1	1/1	0/0
6	126153335	DEL-6-126153335	AG	A	AC=44;AF=0.297;AN=148;CSQ=-|upstream_gene_variant|MODIFIER||Zm00001d037465|Transcript|Zm00001d037465_T001|protein_coding|||||||||||1985|-1|||,-|upstream_gene_variant|MODIFIER||Zm00001d037465|Transcript|Zm00001d037465_T002|protein_coding|||||||||||1378|-1|||,-|upstream_gene_variant|MODIFIER||Zm00001d037465|Transcript|Zm00001d037465_T003|protein_coding|||||||||||1378|-1|||,-|upstream_gene_variant|M…	0/0	1/1	1/1	0/0	1/1	0/0	0/0	1/1	1/1	0/0	0/0	0/0	0/0	1/1	1/1	1/1	0/0	1/1	0/0	1/1	0/0	1/1	0/0	./.	0/0	0/0	1/1	1/1	./.	0/0	0/0	0/0	0/0	./.	0/0	0/0	0/0	0/0	./.	0/0	0/0	1/1	1/1	0/0
6	126153366	DEL-6-126153366	AGG	A	AC=99;AF=0.66;AN=150;BaseQRankSum=0.431;CSQ=-|upstream_gene_variant|MODIFIER||Zm00001d037465|Transcript|Zm00001d037465_T002|protein_coding|||||||||||1409|-1|||,-|upstream_gene_variant|MODIFIER||Zm00001d037465|Transcript|Zm00001d037465_T003|protein_coding|||||||||||1409|-1|||,-|upstream_gene_variant|MODIFIER||Zm00001d037465|Transcript|Zm00001d037465_T006|protein_coding|||||||||||1409|-1|||,-|upstr…	./.	1/1	1/1	0/0	1/1	1/1	0/0	1/1	1/1	0/0	1/1	1/1	1/1	1/1	1/1	1/1	1/1	1/1	1/1	1/1	0/0	1/1	1/1	./.	0/0	0/0	1/1	1/1	./.	1/1	0/0	1/1	1/1	0/0	1/1	1/1	1/1	1/1	0/0	1/1	1/1	1/1	1/1	0/0
6	126153391	SNP-6-126153391	G	A	AC=115;AF=0.833;AN=138;BaseQRankSum=-1.282;CSQ=A|upstream_gene_variant|MODIFIER||Zm00001d037465|Transcript|Zm00001d037465_T002|protein_coding|||||||||||1433|-1|||,A|upstream_gene_variant|MODIFIER||Zm00001d037465|Transcript|Zm00001d037465_T003|protein_coding|||||||||||1433|-1|||,A|upstream_gene_variant|MODIFIER||Zm00001d037465|Transcript|Zm00001d037465_T006|protein_coding|||||||||||1433|-1|||,A|up…	./.	1/1	1/1	0/0	1/1	1/1	0/0	1/1	1/1	1/1	1/1	1/1	1/1	1/1	1/1	1/1	1/1	1/1	1/1	1/1	0/0	1/1	1/1	./.	./.	0/0	1/1	./.	./.	1/1	./.	1/1	1/1	./.	1/1	1/1	1/1	1/1	./.	1/1	1/1	1/1	./.	0/0
6	126153396	SNP-6-126153396	G	A	AC=111;AF=0.828;AN=134;BaseQRankSum=-1.282;CSQ=A|upstream_gene_variant|MODIFIER||Zm00001d037465|Transcript|Zm00001d037465_T002|protein_coding|||||||||||1438|-1|||,A|upstream_gene_variant|MODIFIER||Zm00001d037465|Transcript|Zm00001d037465_T003|protein_coding|||||||||||1438|-1|||,A|upstream_gene_variant|MODIFIER||Zm00001d037465|Transcript|Zm00001d037465_T006|protein_coding|||||||||||1438|-1|||,A|up…	./.	1/1	1/1	0/0	1/1	1/1	0/0	1/1	1/1	1/1	1/1	1/1	./.	1/1	1/1	1/1	1/1	1/1	1/1	1/1	0/0	1/1	1/1	./.	./.	0/0	1/1	./.	./.	1/1	./.	1/1	1/1	./.	1/1	1/1	1/1	1/1	./.	1/1	1/1	1/1	./.	0/0
6	126153433	DEL-6-126153433	CTCTATATA	C	AC=93;AF=0.674;AN=138;BaseQRankSum=1.28;CSQ=-|upstream_gene_variant|MODIFIER||Zm00001d037465|Transcript|Zm00001d037465_T002|protein_coding|||||||||||1476|-1|||,-|upstream_gene_variant|MODIFIER||Zm00001d037465|Transcript|Zm00001d037465_T003|protein_coding|||||||||||1476|-1|||,-|upstream_gene_variant|MODIFIER||Zm00001d037465|Transcript|Zm00001d037465_T006|protein_coding|||||||||||1476|-1|||,-|upstr…	0/0	1/1	1/1	0/0	1/1	1/1	0/0	1/1	./.	1/1	1/1	1/1	./.	./.	1/1	1/1	1/1	1/1	1/1	1/1	0/0	1/1	1/1	0/0	./.	0/0	1/1	./.	0/0	1/1	./.	1/1	1/1	./.	1/1	1/1	1/1	1/1	./.	1/1	1/1	1/1	1/1	0/0
6	126153497	DEL-6-126153497	CACCA	C	AC=122;AF=0.813;AN=150;CSQ=-|upstream_gene_variant|MODIFIER||Zm00001d037465|Transcript|Zm00001d037465_T002|protein_coding|||||||||||1540|-1|||,-|upstream_gene_variant|MODIFIER||Zm00001d037465|Transcript|Zm00001d037465_T003|protein_coding|||||||||||1540|-1|||,-|upstream_gene_variant|MODIFIER||Zm00001d037465|Transcript|Zm00001d037465_T006|protein_coding|||||||||||1540|-1|||,-|upstream_gene_variant|…	1/1	1/1	1/1	0/0	1/1	1/1	0/0	1/1	1/1	1/1	1/1	1/1	1/1	1/1	1/1	1/1	1/1	1/1	1/1	1/1	0/0	0/0	1/1	0/0	./.	0/0	./.	1/1	1/1	1/1	1/1	1/1	1/1	./.	1/1	1/1	1/1	1/1	1/1	1/1	1/1	1/1	1/1	0/0
6	126153577	INS-6-126153577	A	AT	AC=105;AF=0.682;AN=154;BaseQRankSum=1.15;CSQ=T|upstream_gene_variant|MODIFIER||Zm00001d037465|Transcript|Zm00001d037465_T002|protein_coding|||||||||||1619|-1|||,T|upstream_gene_variant|MODIFIER||Zm00001d037465|Transcript|Zm00001d037465_T003|protein_coding|||||||||||1619|-1|||,T|upstream_gene_variant|MODIFIER||Zm00001d037465|Transcript|Zm00001d037465_T006|protein_coding|||||||||||1619|-1|||,T|upst…	0/0	1/1	1/1	0/0	1/1	1/1	0/0	0/1	1/1	0/0	1/1	1/1	1/1	1/1	1/1	1/1	1/1	1/1	1/1	0/0	0/0	1/1	1/1	0/0	0/0	0/0	./.	1/1	0/0	./.	1/1	1/1	1/1	1/1	1/1	1/1	1/1	1/1	1/1	1/1	1/1	1/1	1/1	0/0
6	126153628	SNP-6-126153628	T	A	AC=128;AF=0.842;AN=152;CSQ=A|upstream_gene_variant|MODIFIER||Zm00001d037465|Transcript|Zm00001d037465_T002|protein_coding|||||||||||1670|-1|||,A|upstream_gene_variant|MODIFIER||Zm00001d037465|Transcript|Zm00001d037465_T003|protein_coding|||||||||||1670|-1|||,A|upstream_gene_variant|MODIFIER||Zm00001d037465|Transcript|Zm00001d037465_T006|protein_coding|||||||||||1670|-1|||,A|upstream_gene_variant|…	1/1	1/1	1/1	0/0	1/1	1/1	0/0	1/1	1/1	1/1	1/1	1/1	1/1	1/1	1/1	1/1	1/1	1/1	./.	./.	0/0	1/1	1/1	0/0	0/0	0/0	1/1	1/1	./.	1/1	1/1	1/1	1/1	1/1	1/1	1/1	1/1	1/1	1/1	1/1	1/1	1/1	1/1	0/0
6	126153646	SNP-6-126153646	C	A	AC=21;AF=0.136;AN=154;BaseQRankSum=-1.282;CSQ=A|upstream_gene_variant|MODIFIER||Zm00001d037465|Transcript|Zm00001d037465_T002|protein_coding|||||||||||1688|-1|||,A|upstream_gene_variant|MODIFIER||Zm00001d037465|Transcript|Zm00001d037465_T003|protein_coding|||||||||||1688|-1|||,A|upstream_gene_variant|MODIFIER||Zm00001d037465|Transcript|Zm00001d037465_T006|protein_coding|||||||||||1688|-1|||,A|ups…	1/1	0/0	0/0	0/0	0/0	0/0	0/0	0/1	0/0	1/1	./.	0/0	0/0	0/0	0/0	0/0	0/0	0/0	0/0	0/0	0/0	0/0	0/0	0/0	0/0	0/0	0/0	0/0	./.	0/0	0/0	0/0	0/0	0/0	0/0	0/0	0/0	0/0	0/0	0/0	0/0	0/0	0/0	0/0
6	126153696	INS-6-126153696	C	CA	AC=122;AF=0.836;AN=146;CSQ=A|upstream_gene_variant|MODIFIER||Zm00001d037465|Transcript|Zm00001d037465_T002|protein_coding|||||||||||1738|-1|||,A|upstream_gene_variant|MODIFIER||Zm00001d037465|Transcript|Zm00001d037465_T003|protein_coding|||||||||||1738|-1|||,A|upstream_gene_variant|MODIFIER||Zm00001d037465|Transcript|Zm00001d037465_T006|protein_coding|||||||||||1738|-1|||,A|upstream_gene_variant|…	1/1	1/1	./.	0/0	1/1	1/1	0/0	1/1	1/1	1/1	./.	1/1	1/1	1/1	1/1	1/1	1/1	1/1	1/1	1/1	0/0	1/1	1/1	0/0	0/0	0/0	1/1	./.	1/1	1/1	1/1	1/1	1/1	1/1	1/1	1/1	1/1	1/1	1/1	1/1	1/1	1/1	1/1	0/0
6	126153724	SNP-6-126153724	C	A	AC=96;AF=0.667;AN=144;CSQ=A|upstream_gene_variant|MODIFIER||Zm00001d037465|Transcript|Zm00001d037465_T002|protein_coding|||||||||||1766|-1|||,A|upstream_gene_variant|MODIFIER||Zm00001d037465|Transcript|Zm00001d037465_T003|protein_coding|||||||||||1766|-1|||,A|upstream_gene_variant|MODIFIER||Zm00001d037465|Transcript|Zm00001d037465_T006|protein_coding|||||||||||1766|-1|||,A|upstream_gene_variant|M…	0/0	1/1	./.	0/0	1/1	1/1	0/0	1/1	1/1	0/0	./.	1/1	1/1	1/1	1/1	1/1	1/1	1/1	1/1	1/1	0/0	1/1	1/1	0/0	0/0	0/0	1/1	./.	0/0	1/1	1/1	1/1	1/1	0/0	./.	1/1	1/1	1/1	1/1	1/1	1/1	1/1	1/1	0/0
6	126153747	SNP-6-126153747	T	A	AC=122;AF=0.836;AN=146;CSQ=A|upstream_gene_variant|MODIFIER||Zm00001d037465|Transcript|Zm00001d037465_T002|protein_coding|||||||||||1789|-1|||,A|upstream_gene_variant|MODIFIER||Zm00001d037465|Transcript|Zm00001d037465_T003|protein_coding|||||||||||1789|-1|||,A|upstream_gene_variant|MODIFIER||Zm00001d037465|Transcript|Zm00001d037465_T006|protein_coding|||||||||||1789|-1|||,A|upstream_gene_variant|…	1/1	1/1	./.	0/0	1/1	1/1	0/0	1/1	1/1	1/1	./.	1/1	1/1	1/1	1/1	1/1	1/1	1/1	1/1	1/1	0/0	1/1	1/1	0/0	0/0	0/0	1/1	./.	1/1	1/1	1/1	1/1	1/1	1/1	1/1	1/1	1/1	1/1	1/1	1/1	1/1	1/1	1/1	0/0
6	126153748	SNP-6-126153748	C	T	AC=22;AF=0.145;AN=152;CSQ=T|upstream_gene_variant|MODIFIER||Zm00001d037465|Transcript|Zm00001d037465_T002|protein_coding|||||||||||1790|-1|||,T|upstream_gene_variant|MODIFIER||Zm00001d037465|Transcript|Zm00001d037465_T003|protein_coding|||||||||||1790|-1|||,T|upstream_gene_variant|MODIFIER||Zm00001d037465|Transcript|Zm00001d037465_T006|protein_coding|||||||||||1790|-1|||,T|upstream_gene_variant|M…	0/0	1/1	./.	0/0	1/1	0/0	0/0	1/1	1/1	0/0	0/0	0/0	0/0	0/0	1/1	1/1	0/0	0/0	0/0	1/1	0/0	1/1	0/0	0/0	0/0	0/0	0/0	./.	0/0	0/0	0/0	0/0	0/0	0/0	0/0	0/0	0/0	0/0	0/0	0/0	0/0	1/1	0/0	0/0
6	126153794	SNP-6-126153794	T	C	AC=122;AF=0.824;AN=148;CSQ=C|upstream_gene_variant|MODIFIER||Zm00001d037465|Transcript|Zm00001d037465_T002|protein_coding|||||||||||1836|-1|||,C|upstream_gene_variant|MODIFIER||Zm00001d037465|Transcript|Zm00001d037465_T003|protein_coding|||||||||||1836|-1|||,C|upstream_gene_variant|MODIFIER||Zm00001d037465|Transcript|Zm00001d037465_T006|protein_coding|||||||||||1836|-1|||,C|upstream_gene_variant|…	1/1	1/1	./.	0/0	1/1	1/1	0/0	1/1	1/1	1/1	1/1	1/1	1/1	1/1	1/1	1/1	1/1	1/1	1/1	1/1	0/0	1/1	1/1	0/0	0/0	0/0	1/1	./.	1/1	1/1	1/1	1/1	1/1	1/1	1/1	1/1	1/1	1/1	1/1	1/1	1/1	1/1	1/1	0/0
6	126153798	SNP-6-126153798	C	T	AC=124;AF=0.827;AN=150;CSQ=T|upstream_gene_variant|MODIFIER||Zm00001d037465|Transcript|Zm00001d037465_T002|protein_coding|||||||||||1840|-1|||,T|upstream_gene_variant|MODIFIER||Zm00001d037465|Transcript|Zm00001d037465_T003|protein_coding|||||||||||1840|-1|||,T|upstream_gene_variant|MODIFIER||Zm00001d037465|Transcript|Zm00001d037465_T006|protein_coding|||||||||||1840|-1|||,T|upstream_gene_variant|…	1/1	1/1	./.	0/0	1/1	1/1	0/0	1/1	1/1	1/1	1/1	1/1	1/1	1/1	1/1	1/1	1/1	1/1	1/1	1/1	0/0	1/1	1/1	0/0	0/0	0/0	1/1	./.	1/1	1/1	1/1	1/1	1/1	1/1	1/1	1/1	1/1	1/1	1/1	1/1	1/1	1/1	1/1	0/0
6	126153814	SNP-6-126153814	C	T	AC=126;AF=0.829;AN=152;CSQ=T|upstream_gene_variant|MODIFIER||Zm00001d037465|Transcript|Zm00001d037465_T002|protein_coding|||||||||||1856|-1|||,T|upstream_gene_variant|MODIFIER||Zm00001d037465|Transcript|Zm00001d037465_T003|protein_coding|||||||||||1856|-1|||,T|upstream_gene_variant|MODIFIER||Zm00001d037465|Transcript|Zm00001d037465_T006|protein_coding|||||||||||1856|-1|||,T|upstream_gene_variant|…	1/1	1/1	./.	0/0	1/1	1/1	0/0	1/1	1/1	1/1	1/1	1/1	1/1	1/1	1/1	1/1	1/1	1/1	1/1	1/1	0/0	1/1	1/1	0/0	0/0	0/0	1/1	./.	1/1	1/1	1/1	1/1	1/1	1/1	1/1	1/1	1/1	1/1	1/1	1/1	1/1	1/1	1/1	0/0
6	126153822	SNP-6-126153822	G	A	AC=22;AF=0.139;AN=158;CSQ=A|upstream_gene_variant|MODIFIER||Zm00001d037465|Transcript|Zm00001d037465_T002|protein_coding|||||||||||1864|-1|||,A|upstream_gene_variant|MODIFIER||Zm00001d037465|Transcript|Zm00001d037465_T003|protein_coding|||||||||||1864|-1|||,A|upstream_gene_variant|MODIFIER||Zm00001d037465|Transcript|Zm00001d037465_T006|protein_coding|||||||||||1864|-1|||,A|upstream_gene_variant|M…	1/1	0/0	0/0	0/0	0/0	0/0	0/0	0/0	0/0	0/0	0/0	0/0	0/0	0/0	0/0	0/0	0/0	0/0	0/0	0/0	0/0	0/0	0/0	0/0	0/0	0/0	0/0	./.	1/1	0/0	0/0	0/0	0/0	1/1	0/0	0/0	0/0	0/0	0/0	0/0	0/0	0/0	0/0	0/0
6	126153825	SNP-6-126153825	C	A	AC=106;AF=0.688;AN=154;CSQ=A|upstream_gene_variant|MODIFIER||Zm00001d037465|Transcript|Zm00001d037465_T002|protein_coding|||||||||||1867|-1|||,A|upstream_gene_variant|MODIFIER||Zm00001d037465|Transcript|Zm00001d037465_T003|protein_coding|||||||||||1867|-1|||,A|upstream_gene_variant|MODIFIER||Zm00001d037465|Transcript|Zm00001d037465_T006|protein_coding|||||||||||1867|-1|||,A|upstream_gene_variant|…	0/0	1/1	./.	0/0	1/1	1/1	0/0	1/1	1/1	1/1	1/1	1/1	1/1	1/1	1/1	1/1	1/1	1/1	1/1	1/1	0/0	1/1	1/1	0/0	0/0	0/0	1/1	./.	0/0	1/1	1/1	1/1	1/1	0/0	1/1	1/1	1/1	1/1	1/1	1/1	1/1	1/1	1/1	0/0
6	126153846	SNP-6-126153846	A	C	AC=130;AF=0.833;AN=156;BaseQRankSum=1.59;CSQ=C|upstream_gene_variant|MODIFIER||Zm00001d037465|Transcript|Zm00001d037465_T002|protein_coding|||||||||||1888|-1|||,C|upstream_gene_variant|MODIFIER||Zm00001d037465|Transcript|Zm00001d037465_T003|protein_coding|||||||||||1888|-1|||,C|upstream_gene_variant|MODIFIER||Zm00001d037465|Transcript|Zm00001d037465_T006|protein_coding|||||||||||1888|-1|||,C|upst…	1/1	1/1	./.	0/0	1/1	1/1	0/0	1/1	1/1	1/1	1/1	1/1	1/1	1/1	1/1	1/1	1/1	1/1	1/1	1/1	0/0	1/1	1/1	0/0	0/0	0/0	1/1	./.	1/1	1/1	1/1	1/1	1/1	1/1	1/1	1/1	1/1	1/1	1/1	1/1	1/1	1/1	1/1	0/0
6	126153882	SNP-6-126153882	C	T	AC=129;AF=0.827;AN=156;BaseQRankSum=1.15;CSQ=T|upstream_gene_variant|MODIFIER||Zm00001d037465|Transcript|Zm00001d037465_T002|protein_coding|||||||||||1924|-1|||,T|upstream_gene_variant|MODIFIER||Zm00001d037465|Transcript|Zm00001d037465_T003|protein_coding|||||||||||1924|-1|||,T|upstream_gene_variant|MODIFIER||Zm00001d037465|Transcript|Zm00001d037465_T006|protein_coding|||||||||||1924|-1|||,T|upst…	1/1	1/1	1/1	0/0	1/1	1/1	0/0	1/1	1/1	1/1	1/1	1/1	1/1	1/1	1/1	1/1	1/1	1/1	1/1	./.	0/0	1/1	1/1	0/0	0/0	0/0	1/1	1/1	1/1	1/1	1/1	1/1	1/1	1/1	1/1	1/1	1/1	1/1	1/1	1/1	1/1	1/1	1/1	0/0
6	126153883	SNP-6-126153883	G	A	AC=54;AF=0.342;AN=158;BaseQRankSum=-0.319;CSQ=A|upstream_gene_variant|MODIFIER||Zm00001d037465|Transcript|Zm00001d037465_T002|protein_coding|||||||||||1925|-1|||,A|upstream_gene_variant|MODIFIER||Zm00001d037465|Transcript|Zm00001d037465_T003|protein_coding|||||||||||1925|-1|||,A|upstream_gene_variant|MODIFIER||Zm00001d037465|Transcript|Zm00001d037465_T006|protein_coding|||||||||||1925|-1|||,A|ups…	0/0	0/0	0/0	0/0	0/0	1/1	0/0	0/0	0/0	0/0	1/1	1/1	1/1	0/0	0/0	0/0	1/1	0/0	1/1	0/0	0/0	0/0	1/1	0/0	0/0	0/0	0/0	0/0	0/0	0/0	1/1	1/1	0/0	0/0	1/1	1/1	1/1	1/1	0/0	1/1	1/1	0/0	0/0	0/0
6	126153897	SNP-6-126153897	C	T	AC=102;AF=0.654;AN=156;CSQ=T|upstream_gene_variant|MODIFIER||Zm00001d037465|Transcript|Zm00001d037465_T002|protein_coding|||||||||||1939|-1|||,T|upstream_gene_variant|MODIFIER||Zm00001d037465|Transcript|Zm00001d037465_T003|protein_coding|||||||||||1939|-1|||,T|upstream_gene_variant|MODIFIER||Zm00001d037465|Transcript|Zm00001d037465_T006|protein_coding|||||||||||1939|-1|||,T|upstream_gene_variant|…	0/0	1/1	1/1	0/0	1/1	1/1	0/0	1/1	1/1	0/0	1/1	1/1	1/1	1/1	1/1	1/1	1/1	1/1	1/1	./.	0/0	1/1	1/1	0/0	0/0	0/0	1/1	1/1	0/0	0/0	1/1	1/1	0/0	0/0	1/1	1/1	1/1	1/1	1/1	1/1	1/1	1/1	1/1	0/0
6	126153931	SNP-6-126153931	C	T	AC=102;AF=0.654;AN=156;BaseQRankSum=0;CSQ=T|upstream_gene_variant|MODIFIER||Zm00001d037465|Transcript|Zm00001d037465_T002|protein_coding|||||||||||1973|-1|||,T|upstream_gene_variant|MODIFIER||Zm00001d037465|Transcript|Zm00001d037465_T003|protein_coding|||||||||||1973|-1|||,T|upstream_gene_variant|MODIFIER||Zm00001d037465|Transcript|Zm00001d037465_T006|protein_coding|||||||||||1973|-1|||,T|upstrea…	0/0	./.	1/1	0/0	1/1	1/1	0/0	0/1	1/1	0/1	1/1	1/1	1/1	1/1	1/1	1/1	1/1	1/1	1/1	1/1	0/0	1/1	1/1	0/0	0/0	0/0	1/1	1/1	0/0	0/0	1/1	1/1	0/0	0/0	1/1	1/1	1/1	1/1	1/1	1/1	1/1	1/1	1/1	0/0
6	126153941	SNP-6-126153941	C	A	AC=22;AF=0.138;AN=160;BaseQRankSum=-0.967;CSQ=A|upstream_gene_variant|MODIFIER||Zm00001d037465|Transcript|Zm00001d037465_T002|protein_coding|||||||||||1983|-1|||,A|upstream_gene_variant|MODIFIER||Zm00001d037465|Transcript|Zm00001d037465_T003|protein_coding|||||||||||1983|-1|||,A|upstream_gene_variant|MODIFIER||Zm00001d037465|Transcript|Zm00001d037465_T006|protein_coding|||||||||||1983|-1|||,A|ups…	1/1	0/0	0/0	0/0	0/0	0/0	0/0	0/0	0/0	0/1	0/0	0/0	0/0	0/0	0/0	0/0	0/0	0/0	0/0	0/0	0/0	0/0	0/0	0/0	0/0	0/0	0/0	0/0	1/1	0/0	0/0	0/0	0/0	0/1	0/0	0/0	0/0	0/0	0/0	0/0	0/0	0/0	0/0	0/0
6	126153944	SNP-6-126153944	C	T	AC=22;AF=0.138;AN=160;BaseQRankSum=-0.431;CSQ=T|upstream_gene_variant|MODIFIER||Zm00001d037465|Transcript|Zm00001d037465_T002|protein_coding|||||||||||1986|-1|||,T|upstream_gene_variant|MODIFIER||Zm00001d037465|Transcript|Zm00001d037465_T003|protein_coding|||||||||||1986|-1|||,T|upstream_gene_variant|MODIFIER||Zm00001d037465|Transcript|Zm00001d037465_T006|protein_coding|||||||||||1986|-1|||,T|ups…	1/1	0/0	0/0	0/0	0/0	0/0	0/0	0/0	0/0	0/1	0/0	0/0	0/0	0/0	0/0	0/0	0/0	0/0	0/0	0/0	0/0	0/0	0/0	0/0	0/0	0/0	0/0	0/0	1/1	0/0	0/0	0/0	0/0	0/1	0/0	0/0	0/0	0/0	0/0	0/0	0/0	0/0	0/0	0/0
6	126297844	SNP-6-126297844	A	T	AC=7;AF=0.051;AN=136;BaseQRankSum=-1.282;CSQ=T|upstream_gene_variant|MODIFIER|phosphate%20transporter4|Zm00001d037468|Transcript|Zm00001d037468_T001|protein_coding|||||||||||1463|1||MaizeGDB|,T|upstream_gene_variant|MODIFIER|phosphate%20transporter4|Zm00001d037468|Transcript|Zm00001d037468_T002|protein_coding|||||||||||1565|1||MaizeGDB|;DP=328;ExcessHet=0.7045;FS=4.187;InbreedingCoeff=0.1954;MLEA…	0/0	0/0	./.	./.	0/0	0/0	0/0	0/0	./.	./.	0/0	0/1	0/0	./.	0/0	0/0	./.	0/0	0/0	0/0	0/0	./.	0/0	0/1	0/0	0/0	0/0	0/0	0/1	0/0	0/1	0/0	0/1	0/0	0/0	0/0	0/0	0/0	0/0	0/0	0/0	0/0	0/0	0/0
6	126297878	DEL-6-126297878	TC	T	AC=10;AF=0.074;AN=136;BaseQRankSum=0.749;CSQ=-|upstream_gene_variant|MODIFIER|phosphate%20transporter4|Zm00001d037468|Transcript|Zm00001d037468_T001|protein_coding|||||||||||1428|1||MaizeGDB|,-|upstream_gene_variant|MODIFIER|phosphate%20transporter4|Zm00001d037468|Transcript|Zm00001d037468_T002|protein_coding|||||||||||1530|1||MaizeGDB|;DP=366;ExcessHet=0.1433;FS=2.837;InbreedingCoeff=0.1991;MLEA…	0/0	0/0	./.	0/0	0/0	0/0	0/0	0/0	./.	./.	0/0	0/0	0/0	./.	0/0	0/0	0/0	0/0	0/0	0/1	0/1	./.	0/0	0/0	0/0	0/0	0/0	0/1	0/0	0/0	0/0	0/0	0/0	0/1	0/0	0/0	0/0	0/0	0/1	0/0	0/0	0/0	0/0	0/0
6	126297899	SNP-6-126297899	C	A	AC=7;AF=0.052;AN=134;BaseQRankSum=0;CSQ=A|upstream_gene_variant|MODIFIER|phosphate%20transporter4|Zm00001d037468|Transcript|Zm00001d037468_T001|protein_coding|||||||||||1408|1||MaizeGDB|,A|upstream_gene_variant|MODIFIER|phosphate%20transporter4|Zm00001d037468|Transcript|Zm00001d037468_T002|protein_coding|||||||||||1510|1||MaizeGDB|;DP=378;ExcessHet=0.727;FS=5.238;InbreedingCoeff=0.196;MLEAC=9;MLE…	0/0	0/0	0/0	0/0	0/0	0/0	0/0	0/0	./.	./.	0/0	0/1	0/0	./.	0/0	0/0	./.	0/0	0/0	0/0	0/0	./.	0/0	0/1	0/0	0/0	./.	0/0	0/1	0/0	0/1	0/0	0/1	0/0	0/0	0/0	0/0	0/0	0/0	0/0	0/0	0/0	0/0	./.
6	126297906	SNP-6-126297906	C	T	AC=17;AF=0.127;AN=134;BaseQRankSum=-0.674;CSQ=T|upstream_gene_variant|MODIFIER|phosphate%20transporter4|Zm00001d037468|Transcript|Zm00001d037468_T001|protein_coding|||||||||||1401|1||MaizeGDB|,T|upstream_gene_variant|MODIFIER|phosphate%20transporter4|Zm00001d037468|Transcript|Zm00001d037468_T002|protein_coding|||||||||||1503|1||MaizeGDB|;DP=410;ExcessHet=0.274;FS=10.502;InbreedingCoeff=0.1475;MLE…	0/0	./.	./.	0/0	0/0	0/1	0/0	0/0	./.	./.	0/0	0/1	0/0	./.	0/1	0/0	./.	0/0	0/0	0/0	0/0	0/0	0/0	0/1	0/0	0/0	0/0	0/0	0/1	0/0	0/1	0/0	0/1	0/0	0/0	0/0	0/0	0/0	0/0	0/0	0/0	0/1	0/0	./.
6	126297918	SNP-6-126297918	G	A	AC=7;AF=0.051;AN=136;BaseQRankSum=0;CSQ=A|upstream_gene_variant|MODIFIER|phosphate%20transporter4|Zm00001d037468|Transcript|Zm00001d037468_T001|protein_coding|||||||||||1389|1||MaizeGDB|,A|upstream_gene_variant|MODIFIER|phosphate%20transporter4|Zm00001d037468|Transcript|Zm00001d037468_T002|protein_coding|||||||||||1491|1||MaizeGDB|;DP=357;ExcessHet=0.7156;FS=9.083;InbreedingCoeff=0.1838;MLEAC=9;M…	0/0	0/0	0/0	./.	0/0	0/0	0/0	0/0	./.	./.	0/0	0/1	0/0	./.	0/0	0/0	./.	0/0	0/0	0/0	0/0	0/0	0/0	0/1	0/0	0/0	0/0	0/0	0/1	0/0	0/1	0/0	0/1	0/0	0/0	0/0	0/0	0/0	0/0	0/0	0/0	0/0	0/0	./.
6	126297926	SNP-6-126297926	C	T	AC=11;AF=0.08;AN=138;BaseQRankSum=-0.366;CSQ=T|upstream_gene_variant|MODIFIER|phosphate%20transporter4|Zm00001d037468|Transcript|Zm00001d037468_T001|protein_coding|||||||||||1381|1||MaizeGDB|,T|upstream_gene_variant|MODIFIER|phosphate%20transporter4|Zm00001d037468|Transcript|Zm00001d037468_T002|protein_coding|||||||||||1483|1||MaizeGDB|;DP=357;ExcessHet=0.2201;FS=0;InbreedingCoeff=0.1542;MLEAC=13…	0/0	0/0	0/0	0/0	0/0	0/0	0/0	0/0	./.	./.	0/0	0/0	0/0	./.	0/0	0/0	0/0	0/0	0/0	0/1	0/1	0/0	0/0	0/0	0/0	0/0	0/0	0/1	0/0	0/0	0/0	0/0	0/0	0/1	0/1	0/0	0/0	0/0	0/1	0/0	0/0	0/0	0/0	./.
6	126298598	SNP-6-126298598	A	G	AC=34;AF=0.218;AN=156;BaseQRankSum=0.674;CSQ=G|upstream_gene_variant|MODIFIER|phosphate%20transporter4|Zm00001d037468|Transcript|Zm00001d037468_T001|protein_coding|||||||||||709|1||MaizeGDB|,G|upstream_gene_variant|MODIFIER|phosphate%20transporter4|Zm00001d037468|Transcript|Zm00001d037468_T002|protein_coding|||||||||||811|1||MaizeGDB|;DP=346;ExcessHet=0;FS=5.434;InbreedingCoeff=0.6292;MLEAC=29;ML…	0/0	1/1	1/1	1/1	0/0	0/0	0/0	0/1	1/1	0/1	0/0	0/0	0/0	1/1	0/0	0/0	0/0	0/0	0/0	0/0	0/0	1/1	0/0	0/0	0/0	0/0	1/1	0/0	0/0	0/0	0/0	0/0	0/0	./.	0/0	0/0	0/0	0/0	0/0	0/0	0/0	0/0	0/0	0/0
6	126298649	INS-6-126298649	G	GC	AC=33;AF=0.212;AN=156;BaseQRankSum=0.842;CSQ=C|upstream_gene_variant|MODIFIER|phosphate%20transporter4|Zm00001d037468|Transcript|Zm00001d037468_T001|protein_coding|||||||||||657|1||MaizeGDB|,C|upstream_gene_variant|MODIFIER|phosphate%20transporter4|Zm00001d037468|Transcript|Zm00001d037468_T002|protein_coding|||||||||||759|1||MaizeGDB|;DP=336;ExcessHet=0;FS=3.188;InbreedingCoeff=0.6822;MLEAC=29;ML…	0/0	1/1	1/1	1/1	0/0	0/0	0/0	0/0	1/1	0/1	0/0	0/0	0/0	1/1	0/0	0/0	0/0	0/0	0/0	0/0	./.	1/1	0/0	0/0	0/0	0/0	1/1	0/0	0/0	0/0	0/0	0/0	0/0	0/0	0/0	0/0	0/0	0/0	0/0	0/0	0/0	0/0	0/0	0/0
6	126298795	DEL-6-126298795	TACCTGCATTATTACCCAA	T	AC=30;AF=0.195;AN=154;CSQ=-|upstream_gene_variant|MODIFIER|phosphate%20transporter4|Zm00001d037468|Transcript|Zm00001d037468_T001|protein_coding|||||||||||494|1||MaizeGDB|,-|upstream_gene_variant|MODIFIER|phosphate%20transporter4|Zm00001d037468|Transcript|Zm00001d037468_T002|protein_coding|||||||||||596|1||MaizeGDB|;DP=339;ExcessHet=0;FS=0;InbreedingCoeff=0.6854;MLEAC=25;MLEAF=0.162;MQ=60;QD=26.0…	0/0	1/1	1/1	1/1	0/0	0/0	0/0	0/0	1/1	1/1	0/0	0/0	0/0	1/1	./.	0/0	0/0	0/0	0/0	0/0	0/0	1/1	0/0	0/0	0/0	0/0	1/1	0/0	0/0	0/0	0/0	0/0	0/0	0/0	0/0	0/0	0/0	0/0	0/0	0/0	0/0	0/0	0/0	0/0
6	126298833	INS-6-126298833	T	TGGC	AC=26;AF=0.173;AN=150;CSQ=GGC|upstream_gene_variant|MODIFIER|phosphate%20transporter4|Zm00001d037468|Transcript|Zm00001d037468_T001|protein_coding|||||||||||473|1||MaizeGDB|,GGC|upstream_gene_variant|MODIFIER|phosphate%20transporter4|Zm00001d037468|Transcript|Zm00001d037468_T002|protein_coding|||||||||||575|1||MaizeGDB|;DP=348;ExcessHet=0;FS=0;InbreedingCoeff=0.6852;MLEAC=23;MLEAF=0.153;MQ=60;QD=…	0/0	1/1	1/1	1/1	0/0	0/0	0/0	0/0	1/1	1/1	0/0	0/0	0/0	1/1	0/0	0/0	0/0	0/0	0/0	0/0	0/0	1/1	0/0	0/0	./.	0/0	1/1	0/0	0/0	0/0	0/0	0/0	0/0	0/0	0/0	0/0	0/0	0/0	0/0	0/0	0/0	0/0	0/0	0/0
6	126298845	SNP-6-126298845	C	A	AC=8;AF=0.054;AN=148;CSQ=A|upstream_gene_variant|MODIFIER|phosphate%20transporter4|Zm00001d037468|Transcript|Zm00001d037468_T001|protein_coding|||||||||||462|1||MaizeGDB|,A|upstream_gene_variant|MODIFIER|phosphate%20transporter4|Zm00001d037468|Transcript|Zm00001d037468_T002|protein_coding|||||||||||564|1||MaizeGDB|;DP=337;ExcessHet=0;FS=0;InbreedingCoeff=0.507;MLEAC=7;MLEAF=0.047;MQ=60;QD=22.16;S…	0/0	1/1	1/1	0/0	0/0	0/0	0/0	0/0	1/1	0/0	0/0	0/0	0/0	0/0	0/0	0/0	0/0	0/0	0/0	0/0	0/0	1/1	0/0	0/0	./.	0/0	0/0	0/0	0/0	0/0	0/0	0/0	0/0	0/0	0/0	0/0	0/0	0/0	./.	0/0	0/0	0/0	0/0	0/0
6	126298870	SNP-6-126298870	C	A	AC=28;AF=0.187;AN=150;CSQ=A|upstream_gene_variant|MODIFIER|phosphate%20transporter4|Zm00001d037468|Transcript|Zm00001d037468_T001|protein_coding|||||||||||437|1||MaizeGDB|,A|upstream_gene_variant|MODIFIER|phosphate%20transporter4|Zm00001d037468|Transcript|Zm00001d037468_T002|protein_coding|||||||||||539|1||MaizeGDB|;DP=349;ExcessHet=0;FS=0;InbreedingCoeff=0.7016;MLEAC=27;MLEAF=0.18;MQ=60;QD=31.74…	0/0	1/1	1/1	1/1	0/0	0/0	0/0	0/0	1/1	1/1	0/0	0/0	0/0	1/1	0/0	0/0	0/0	0/0	0/0	0/0	0/0	1/1	0/0	0/0	0/0	0/0	1/1	0/0	0/0	0/0	0/0	0/0	0/0	0/0	0/0	0/0	0/0	0/0	0/0	0/0	0/0	0/0	0/0	0/0
6	126298874	SNP-6-126298874	T	G	AC=28;AF=0.187;AN=150;CSQ=G|upstream_gene_variant|MODIFIER|phosphate%20transporter4|Zm00001d037468|Transcript|Zm00001d037468_T001|protein_coding|||||||||||433|1||MaizeGDB|,G|upstream_gene_variant|MODIFIER|phosphate%20transporter4|Zm00001d037468|Transcript|Zm00001d037468_T002|protein_coding|||||||||||535|1||MaizeGDB|;DP=350;ExcessHet=0;FS=0;InbreedingCoeff=0.6853;MLEAC=27;MLEAF=0.18;MQ=60;QD=28.91…	0/0	1/1	1/1	1/1	0/0	0/0	0/0	0/0	1/1	1/1	0/0	0/0	0/0	1/1	0/0	0/0	0/0	0/0	0/0	0/0	0/0	1/1	0/0	0/0	0/0	0/0	1/1	0/0	0/0	0/0	0/0	0/0	0/0	0/0	0/0	0/0	0/0	0/0	0/0	0/0	0/0	0/0	0/0	0/0
6	126299012	SNP-6-126299012	A	G	AC=30;AF=0.19;AN=158;BaseQRankSum=1.15;CSQ=G|upstream_gene_variant|MODIFIER|phosphate%20transporter4|Zm00001d037468|Transcript|Zm00001d037468_T001|protein_coding|||||||||||295|1||MaizeGDB|,G|upstream_gene_variant|MODIFIER|phosphate%20transporter4|Zm00001d037468|Transcript|Zm00001d037468_T002|protein_coding|||||||||||397|1||MaizeGDB|;DP=359;ExcessHet=0;FS=6.439;InbreedingCoeff=0.7009;MLEAC=29;MLEA…	0/0	0/1	1/1	1/1	0/0	0/0	0/0	0/0	1/1	0/1	0/0	0/0	0/0	./.	0/0	0/0	0/0	0/0	0/0	0/0	0/0	1/1	0/0	0/0	0/0	0/0	1/1	0/0	0/0	0/0	0/0	0/0	0/0	0/0	0/0	0/0	0/0	0/0	0/0	0/0	0/0	0/0	0/0	0/0
6	126299035	SNP-6-126299035	G	C	AC=30;AF=0.19;AN=158;BaseQRankSum=0.524;CSQ=C|upstream_gene_variant|MODIFIER|phosphate%20transporter4|Zm00001d037468|Transcript|Zm00001d037468_T001|protein_coding|||||||||||272|1||MaizeGDB|,C|upstream_gene_variant|MODIFIER|phosphate%20transporter4|Zm00001d037468|Transcript|Zm00001d037468_T002|protein_coding|||||||||||374|1||MaizeGDB|;DP=375;ExcessHet=0;FS=7.112;InbreedingCoeff=0.6956;MLEAC=30;MLE…	0/0	0/1	1/1	1/1	0/0	0/0	0/0	0/0	1/1	0/1	0/0	0/0	0/0	./.	0/0	0/0	0/0	0/0	0/0	0/0	0/0	1/1	0/0	0/0	0/0	0/0	1/1	0/0	0/0	0/0	0/0	0/0	0/0	0/0	0/0	0/0	0/0	0/0	0/0	0/0	0/0	0/0	0/0	0/0
6	126299189	DEL-6-126299189	AC	A	AC=19;AF=0.12;AN=158;BaseQRankSum=-0.967;CSQ=-|upstream_gene_variant|MODIFIER|phosphate%20transporter4|Zm00001d037468|Transcript|Zm00001d037468_T001|protein_coding|||||||||||117|1||MaizeGDB|,-|upstream_gene_variant|MODIFIER|phosphate%20transporter4|Zm00001d037468|Transcript|Zm00001d037468_T002|protein_coding|||||||||||219|1||MaizeGDB|;DP=387;ExcessHet=0;FS=0;InbreedingCoeff=0.6561;MLEAC=16;MLEAF=…	0/0	0/0	0/0	1/1	0/0	0/0	0/0	0/0	0/0	0/0	0/0	0/0	0/0	0/0	0/0	0/0	0/0	0/0	0/0	1/1	0/0	0/0	0/0	0/0	0/0	0/0	0/0	0/0	0/0	1/1	0/0	0/0	1/1	0/1	0/0	0/0	0/0	0/0	0/0	0/0	0/0	0/0	0/0	0/0
6	126299297	INS-6-126299297	G	GT	AC=36;AF=0.234;AN=154;CSQ=T|upstream_gene_variant|MODIFIER|phosphate%20transporter4|Zm00001d037468|Transcript|Zm00001d037468_T001|protein_coding|||||||||||9|1||MaizeGDB|,T|upstream_gene_variant|MODIFIER|phosphate%20transporter4|Zm00001d037468|Transcript|Zm00001d037468_T002|protein_coding|||||||||||111|1||MaizeGDB|;DP=320;ExcessHet=0;FS=0;InbreedingCoeff=0.7236;MLEAC=35;MLEAF=0.227;MQ=60;QD=34.16;…	./.	1/1	1/1	1/1	0/0	0/0	0/0	0/0	1/1	0/0	0/0	0/0	0/0	1/1	0/0	0/0	0/0	0/0	0/0	1/1	0/0	1/1	0/0	0/0	0/0	0/0	1/1	0/0	0/0	1/1	0/0	0/0	./.	./.	0/0	0/0	0/0	0/0	0/0	0/0	0/0	0/0	0/0	0/0
6	126299381	SNP-6-126299381	G	A	AC=10;AF=0.064;AN=156;CSQ=A|synonymous_variant|LOW|phosphate%20transporter4|Zm00001d037468|Transcript|Zm00001d037468_T001|protein_coding|1/12||||75|75|25|Q|caG/caA|||1||MaizeGDB|,A|upstream_gene_variant|MODIFIER|phosphate%20transporter4|Zm00001d037468|Transcript|Zm00001d037468_T002|protein_coding|||||||||||28|1||MaizeGDB|;DP=303;ExcessHet=0;FS=0;InbreedingCoeff=0.4678;MLEAC=8;MLEAF=0.051;MQ=60;QD…	0/0	0/0	0/0	0/0	0/0	0/0	0/0	0/0	0/0	1/1	0/0	0/0	0/0	0/0	0/0	0/0	0/0	0/0	0/0	0/0	0/0	0/0	0/0	0/0	0/0	0/0	0/0	0/0	0/0	0/0	0/0	0/0	0/0	0/0	0/0	0/0	0/0	0/0	./.	0/0	0/0	0/0	0/0	0/0
6	126299443	SNP-6-126299443	C	T	AC=9;AF=0.059;AN=152;BaseQRankSum=0.253;CSQ=T|missense_variant|MODERATE|phosphate%20transporter4|Zm00001d037468|Transcript|Zm00001d037468_T001|protein_coding|1/12||||137|137|46|A/V|gCg/gTg|||1||MaizeGDB|,T|5_prime_UTR_variant|MODIFIER|phosphate%20transporter4|Zm00001d037468|Transcript|Zm00001d037468_T002|protein_coding|1/14||||35|||||||1||MaizeGDB|;DP=369;ExcessHet=0;FS=0;InbreedingCoeff=0.4832;M…	1/1	0/0	./.	0/0	0/0	0/0	0/0	1/1	0/0	0/0	0/0	0/0	0/0	0/0	0/1	./.	0/0	0/0	0/0	0/0	0/0	0/0	0/0	0/0	0/0	0/0	0/0	0/0	0/0	0/0	0/0	0/0	0/0	0/0	0/0	0/0	0/0	0/0	0/0	0/0	0/0	0/0	0/0	0/0
6	126299501	SNP-6-126299501	G	A	AC=8;AF=0.051;AN=158;CSQ=A|synonymous_variant|LOW|phosphate%20transporter4|Zm00001d037468|Transcript|Zm00001d037468_T001|protein_coding|1/12||||195|195|65|P|ccG/ccA|||1||MaizeGDB|,A|synonymous_variant|LOW|phosphate%20transporter4|Zm00001d037468|Transcript|Zm00001d037468_T002|protein_coding|1/14||||93|36|12|P|ccG/ccA|||1||MaizeGDB|;DP=382;ExcessHet=0;FS=0;InbreedingCoeff=0.5408;MLEAC=6;MLEAF=0.038…	0/0	0/0	0/0	0/0	0/0	0/0	0/0	0/0	0/0	1/1	0/0	0/0	0/0	0/0	0/0	0/0	0/0	0/0	0/0	0/0	0/0	0/0	0/0	0/0	0/0	0/0	0/0	0/0	0/0	0/0	0/0	0/0	0/0	0/0	0/0	0/0	0/0	0/0	0/0	0/0	0/0	0/0	0/0	0/0
6	126299516	SNP-6-126299516	G	A	AC=10;AF=0.064;AN=156;CSQ=A|synonymous_variant|LOW|phosphate%20transporter4|Zm00001d037468|Transcript|Zm00001d037468_T001|protein_coding|1/12||||210|210|70|Q|caG/caA|||1||MaizeGDB|,A|splice_region_variant&synonymous_variant|LOW|phosphate%20transporter4|Zm00001d037468|Transcript|Zm00001d037468_T002|protein_coding|1/14||||108|51|17|Q|caG/caA|||1||MaizeGDB|;DP=376;ExcessHet=0;FS=0;InbreedingCoeff=0.…	0/0	0/0	0/0	0/0	0/0	0/0	0/0	0/0	0/0	0/0	0/0	0/0	0/0	1/1	0/0	0/0	./.	0/0	0/0	0/0	0/0	0/0	0/0	0/0	0/0	0/0	1/1	0/0	0/0	0/0	0/0	0/0	0/0	0/0	0/0	0/0	0/0	0/0	0/0	0/0	0/0	0/0	0/0	0/0
6	126299544	INS-6-126299544	T	TACGTAC	AC=29;AF=0.186;AN=156;BaseQRankSum=-0.253;CSQ=ACGTAC|intron_variant|MODIFIER|phosphate%20transporter4|Zm00001d037468|Transcript|Zm00001d037468_T001|protein_coding||1/11||||||||||1||MaizeGDB|,ACGTAC|intron_variant|MODIFIER|phosphate%20transporter4|Zm00001d037468|Transcript|Zm00001d037468_T002|protein_coding||1/13||||||||||1||MaizeGDB|;DP=388;ExcessHet=0;FS=0;InbreedingCoeff=0.7337;MLEAC=26;MLEAF=0…	1/1	0/0	0/0	0/0	0/0	0/0	0/0	1/1	0/0	1/1	0/0	0/0	0/0	1/1	0/1	1/1	0/0	0/0	0/0	0/0	0/0	0/0	0/0	0/0	0/0	0/0	1/1	0/0	0/0	0/0	0/0	0/0	0/0	0/0	0/0	0/0	0/0	0/0	0/0	0/0	0/0	0/0	0/0	0/0
6	126299582	INS-6-126299582	G	GCA	AC=37;AF=0.237;AN=156;CSQ=CA|intron_variant|MODIFIER|phosphate%20transporter4|Zm00001d037468|Transcript|Zm00001d037468_T001|protein_coding||1/11||||||||||1||MaizeGDB|,CA|intron_variant|MODIFIER|phosphate%20transporter4|Zm00001d037468|Transcript|Zm00001d037468_T002|protein_coding||1/13||||||||||1||MaizeGDB|;DP=400;ExcessHet=0;FS=0;InbreedingCoeff=0.7933;MLEAC=34;MLEAF=0.218;MQ=60;MQRankSum=0;QD=24…	1/1	0/0	0/0	1/1	0/0	0/0	0/0	./.	0/0	1/1	0/0	0/0	0/0	1/1	1/1	1/1	0/0	0/0	0/0	0/0	0/0	0/0	0/0	0/0	0/0	0/0	1/1	0/0	0/0	1/1	0/0	./.	1/1	0/1	0/0	0/0	0/0	0/0	0/0	0/0	0/0	0/0	0/0	0/0
6	126299664	SNP-6-126299664	T	G	AC=48;AF=0.316;AN=152;BaseQRankSum=1.65;CSQ=G|missense_variant|MODERATE|phosphate%20transporter4|Zm00001d037468|Transcript|Zm00001d037468_T001|protein_coding|2/12||||288|288|96|D/E|gaT/gaG|||1||MaizeGDB|,G|missense_variant|MODERATE|phosphate%20transporter4|Zm00001d037468|Transcript|Zm00001d037468_T002|protein_coding|2/14||||171|114|38|D/E|gaT/gaG|||1||MaizeGDB|;DP=368;ExcessHet=0;FS=5.305;Inbreed…	0/0	0/0	0/0	0/0	0/0	1/1	0/0	0/0	0/0	0/0	1/1	1/1	./.	0/0	0/0	0/0	1/1	0/0	1/1	0/0	0/0	0/0	./.	0/0	0/0	./.	0/0	0/0	0/0	0/0	1/1	0/1	0/0	0/0	1/1	1/1	1/1	1/1	0/0	1/1	1/1	1/1	0/0	0/0
6	126299675	INS-6-126299675	C	CCGG	AC=44;AF=0.297;AN=148;BaseQRankSum=1.28;CSQ=CGG|inframe_insertion|MODERATE|phosphate%20transporter4|Zm00001d037468|Transcript|Zm00001d037468_T001|protein_coding|2/12||||299-300|299-300|100|A/AG|gcg/gcCGGg|||1||MaizeGDB|,CGG|inframe_insertion|MODERATE|phosphate%20transporter4|Zm00001d037468|Transcript|Zm00001d037468_T002|protein_coding|2/14||||182-183|125-126|42|A/AG|gcg/gcCGGg|||1||MaizeGDB|;DP=3…	0/0	0/0	0/0	0/0	0/0	1/1	0/0	0/0	0/0	0/0	1/1	1/1	./.	0/0	0/0	0/0	./.	0/0	1/1	0/0	0/0	0/0	./.	0/0	0/0	0/0	0/0	0/0	0/0	0/0	1/1	0/1	0/0	0/0	1/1	1/1	1/1	1/1	0/0	1/1	1/1	./.	0/0	0/0
6	126299694	SNP-6-126299694	G	C	AC=12;AF=0.08;AN=150;CSQ=C|synonymous_variant|LOW|phosphate%20transporter4|Zm00001d037468|Transcript|Zm00001d037468_T001|protein_coding|2/12||||318|318|106|A|gcG/gcC|||1||MaizeGDB|,C|synonymous_variant|LOW|phosphate%20transporter4|Zm00001d037468|Transcript|Zm00001d037468_T002|protein_coding|2/14||||201|144|48|A|gcG/gcC|||1||MaizeGDB|;DP=322;ExcessHet=0;FS=0;InbreedingCoeff=0.5576;MLEAC=11;MLEAF=0…	0/0	1/1	1/1	0/0	0/0	0/0	0/0	0/0	1/1	0/0	0/0	0/0	0/0	0/0	0/0	0/0	./.	0/0	0/0	1/1	0/0	1/1	./.	0/0	0/0	0/0	0/0	0/0	0/0	0/0	0/0	0/0	0/0	0/0	0/0	0/0	0/0	0/0	0/0	0/0	0/0	0/0	0/0	0/0
6	126299872	SNP-6-126299872	G	A	AC=8;AF=0.051;AN=158;CSQ=A|missense_variant|MODERATE|phosphate%20transporter4|Zm00001d037468|Transcript|Zm00001d037468_T001|protein_coding|2/12||||496|496|166|G/R|Ggg/Agg|||1||MaizeGDB|,A|missense_variant|MODERATE|phosphate%20transporter4|Zm00001d037468|Transcript|Zm00001d037468_T002|protein_coding|2/14||||379|322|108|G/R|Ggg/Agg|||1||MaizeGDB|;DP=335;ExcessHet=0;FS=0;InbreedingCoeff=0.4769;MLEAC…	0/0	0/0	0/0	0/0	0/0	0/0	0/0	0/0	0/0	0/0	0/0	0/0	0/0	0/0	0/0	0/0	0/0	0/0	0/0	0/0	0/0	0/0	0/0	0/0	0/0	0/0	0/0	0/0	0/0	0/0	0/0	0/0	0/0	0/0	0/0	0/0	0/0	0/0	0/0	0/0	0/0	0/0	0/0	0/0
6	126299883	SNP-6-126299883	T	C	AC=88;AF=0.587;AN=150;BaseQRankSum=-0.21;CSQ=C|synonymous_variant|LOW|phosphate%20transporter4|Zm00001d037468|Transcript|Zm00001d037468_T001|protein_coding|2/12||||507|507|169|A|gcT/gcC|||1||MaizeGDB|,C|synonymous_variant|LOW|phosphate%20transporter4|Zm00001d037468|Transcript|Zm00001d037468_T002|protein_coding|2/14||||390|333|111|A|gcT/gcC|||1||MaizeGDB|;DP=351;ExcessHet=0;FS=8.758;InbreedingCoef…	0/0	1/1	1/1	./.	0/0	1/1	0/0	0/0	1/1	1/1	1/1	1/1	./.	1/1	0/0	0/0	1/1	0/0	1/1	1/1	0/0	1/1	1/1	0/0	0/0	0/0	1/1	0/0	0/0	./.	1/1	./.	1/1	0/1	1/1	1/1	1/1	1/1	0/0	1/1	1/1	1/1	0/1	0/0
6	126299886	SNP-6-126299886	C	T	AC=21;AF=0.136;AN=154;BaseQRankSum=-1.282;CSQ=T|synonymous_variant|LOW|phosphate%20transporter4|Zm00001d037468|Transcript|Zm00001d037468_T001|protein_coding|2/12||||510|510|170|A|gcC/gcT|||1||MaizeGDB|,T|synonymous_variant|LOW|phosphate%20transporter4|Zm00001d037468|Transcript|Zm00001d037468_T002|protein_coding|2/14||||393|336|112|A|gcC/gcT|||1||MaizeGDB|;DP=342;ExcessHet=0;FS=4.771;InbreedingCoe…	0/0	1/1	1/1	./.	0/0	0/0	0/0	0/0	1/1	0/0	0/0	0/0	0/0	1/1	0/0	0/0	0/0	0/0	0/0	0/0	0/0	1/1	0/0	0/0	0/0	0/0	1/1	0/0	0/0	./.	0/0	0/0	1/1	0/1	0/0	0/0	0/0	0/0	0/0	0/0	0/0	0/0	0/0	0/0
6	126300100	DEL-6-126300100	GAAGGACCCGTGTCTC	G	AC=20;AF=0.127;AN=158;CSQ=-|inframe_deletion|MODERATE|phosphate%20transporter4|Zm00001d037468|Transcript|Zm00001d037468_T001|protein_coding|3/12||||644-658|644-658|215-220|EGPVSQ/E|gAAGGACCCGTGTCTCaa/gaa|||1||MaizeGDB|,-|inframe_deletion|MODERATE|phosphate%20transporter4|Zm00001d037468|Transcript|Zm00001d037468_T002|protein_coding|3/14||||527-541|470-484|157-162|EGPVSQ/E|gAAGGACCCGTGTCTCaa/gaa|||…	1/1	0/0	0/0	0/0	0/0	0/0	0/0	1/1	0/0	0/0	0/0	0/0	0/0	0/0	./.	1/1	0/0	0/0	0/0	0/0	0/0	0/0	0/0	0/0	0/0	0/0	0/0	1/1	1/1	0/0	0/0	0/0	0/0	0/0	0/0	0/0	0/0	0/0	0/0	0/0	0/0	0/0	0/0	0/0
6	126300160	SNP-6-126300160	A	G	AC=23;AF=0.146;AN=158;BaseQRankSum=0.674;CSQ=G|missense_variant|MODERATE|phosphate%20transporter4|Zm00001d037468|Transcript|Zm00001d037468_T001|protein_coding|3/12||||703|703|235|M/V|Atg/Gtg|||1||MaizeGDB|,G|missense_variant|MODERATE|phosphate%20transporter4|Zm00001d037468|Transcript|Zm00001d037468_T002|protein_coding|3/14||||586|529|177|M/V|Atg/Gtg|||1||MaizeGDB|;DP=356;ExcessHet=0;FS=0;Inbreedi…	1/1	0/0	0/0	0/0	0/0	0/0	0/0	1/1	0/0	0/0	0/0	0/0	0/0	0/0	1/1	1/1	0/0	0/0	0/0	0/0	0/0	0/0	0/0	0/0	0/0	0/0	0/0	1/1	1/1	0/0	./.	0/0	0/0	0/1	0/0	0/0	0/0	0/0	0/0	0/0	0/0	0/0	0/0	0/0
6	126300276	SNP-6-126300276	G	A	AC=14;AF=0.093;AN=150;CSQ=A|synonymous_variant|LOW|phosphate%20transporter4|Zm00001d037468|Transcript|Zm00001d037468_T001|protein_coding|3/12||||819|819|273|Q|caG/caA|||1||MaizeGDB|,A|synonymous_variant|LOW|phosphate%20transporter4|Zm00001d037468|Transcript|Zm00001d037468_T002|protein_coding|3/14||||702|645|215|Q|caG/caA|||1||MaizeGDB|;DP=343;ExcessHet=0;FS=0;InbreedingCoeff=0.5821;MLEAC=13;MLEAF…	1/1	0/0	0/0	0/0	0/0	0/0	0/0	./.	0/0	0/0	0/0	0/0	0/0	0/0	./.	1/1	0/0	0/0	0/0	0/0	0/0	0/0	0/0	0/0	0/0	0/0	0/0	0/0	1/1	0/0	0/0	0/0	0/0	0/0	0/0	0/0	0/0	0/0	0/0	0/0	0/0	0/0	0/0	0/0
6	126300303	SNP-6-126300303	C	A	AC=18;AF=0.117;AN=154;CSQ=A|synonymous_variant|LOW|phosphate%20transporter4|Zm00001d037468|Transcript|Zm00001d037468_T001|protein_coding|3/12||||846|846|282|T|acC/acA|||1||MaizeGDB|,A|synonymous_variant|LOW|phosphate%20transporter4|Zm00001d037468|Transcript|Zm00001d037468_T002|protein_coding|3/14||||729|672|224|T|acC/acA|||1||MaizeGDB|;DP=343;ExcessHet=0;FS=0;InbreedingCoeff=0.6079;MLEAC=16;MLEAF…	1/1	0/0	0/0	0/0	0/0	0/0	0/0	1/1	0/0	0/0	0/0	0/0	0/0	0/0	./.	1/1	0/0	0/0	0/0	0/0	0/0	0/0	0/0	0/0	0/0	0/0	0/0	1/1	1/1	0/0	0/0	0/0	0/0	0/0	0/0	0/0	0/0	0/0	0/0	0/0	0/0	0/0	0/0	0/0
6	126300312	SNP-6-126300312	T	C	AC=18;AF=0.117;AN=154;CSQ=C|synonymous_variant|LOW|phosphate%20transporter4|Zm00001d037468|Transcript|Zm00001d037468_T001|protein_coding|3/12||||855|855|285|S|agT/agC|||1||MaizeGDB|,C|synonymous_variant|LOW|phosphate%20transporter4|Zm00001d037468|Transcript|Zm00001d037468_T002|protein_coding|3/14||||738|681|227|S|agT/agC|||1||MaizeGDB|;DP=359;ExcessHet=0;FS=0;InbreedingCoeff=0.6504;MLEAC=17;MLEAF…	1/1	0/0	0/0	0/0	0/0	0/0	0/0	1/1	0/0	0/0	0/0	0/0	0/0	0/0	./.	1/1	0/0	0/0	0/0	0/0	0/0	0/0	0/0	0/0	0/0	0/0	0/0	1/1	1/1	0/0	0/0	0/0	0/0	0/0	0/0	0/0	0/0	0/0	0/0	0/0	0/0	0/0	0/0	0/0
6	126300436	SNP-6-126300436	C	T	AC=19;AF=0.12;AN=158;BaseQRankSum=-0.431;CSQ=T|intron_variant|MODIFIER|phosphate%20transporter4|Zm00001d037468|Transcript|Zm00001d037468_T001|protein_coding||3/11||||||||||1||MaizeGDB|,T|intron_variant|MODIFIER|phosphate%20transporter4|Zm00001d037468|Transcript|Zm00001d037468_T002|protein_coding||3/13||||||||||1||MaizeGDB|;DP=391;ExcessHet=0;FS=3.68;InbreedingCoeff=0.6167;MLEAC=18;MLEAF=0.114;MQ=…	1/1	0/0	0/0	0/0	0/0	0/0	0/0	0/1	0/0	0/0	0/0	0/0	0/0	0/0	1/1	1/1	0/0	0/0	0/0	0/0	0/0	0/0	0/0	0/0	0/0	0/0	0/0	0/0	1/1	0/0	0/0	0/0	0/0	./.	0/0	0/0	0/0	0/0	0/0	0/0	0/0	0/0	0/0	0/0
6	126300611	SNP-6-126300611	C	T	AC=20;AF=0.127;AN=158;CSQ=T|intron_variant|MODIFIER|phosphate%20transporter4|Zm00001d037468|Transcript|Zm00001d037468_T001|protein_coding||4/11||||||||||1||MaizeGDB|,T|intron_variant|MODIFIER|phosphate%20transporter4|Zm00001d037468|Transcript|Zm00001d037468_T002|protein_coding||4/13||||||||||1||MaizeGDB|;DP=421;ExcessHet=0;FS=0;InbreedingCoeff=0.716;MLEAC=18;MLEAF=0.114;MQ=60;QD=22.27;SOR=0.841	0/0	1/1	1/1	1/1	0/0	0/0	0/0	0/0	1/1	0/0	0/0	0/0	0/0	0/0	0/0	0/0	0/0	0/0	0/0	1/1	0/0	1/1	0/0	0/0	0/0	0/0	0/0	0/0	0/0	1/1	0/0	0/0	1/1	./.	0/0	0/0	0/0	0/0	0/0	0/0	0/0	0/0	0/0	0/0
6	126300635	INS-6-126300635	A	AT	AC=18;AF=0.114;AN=158;CSQ=T|splice_polypyrimidine_tract_variant&intron_variant|LOW|phosphate%20transporter4|Zm00001d037468|Transcript|Zm00001d037468_T001|protein_coding||4/11||||||||||1||MaizeGDB|,T|splice_polypyrimidine_tract_variant&intron_variant|LOW|phosphate%20transporter4|Zm00001d037468|Transcript|Zm00001d037468_T002|protein_coding||4/13||||||||||1||MaizeGDB|;DP=418;ExcessHet=0;FS=0;Inbreed…	0/0	./.	1/1	0/0	0/0	0/0	0/0	0/0	1/1	0/0	0/0	0/0	0/0	0/0	0/0	0/0	0/0	0/0	0/0	1/1	0/0	1/1	0/0	0/0	0/0	0/0	0/0	0/0	0/0	1/1	0/0	0/0	1/1	1/1	0/0	0/0	0/0	0/0	0/0	0/0	0/0	0/0	0/0	0/0
6	126300693	SNP-6-126300693	G	T	AC=10;AF=0.064;AN=156;CSQ=T|synonymous_variant|LOW|phosphate%20transporter4|Zm00001d037468|Transcript|Zm00001d037468_T001|protein_coding|5/12||||1050|1050|350|V|gtG/gtT|||1||MaizeGDB|,T|synonymous_variant|LOW|phosphate%20transporter4|Zm00001d037468|Transcript|Zm00001d037468_T002|protein_coding|5/14||||933|876|292|V|gtG/gtT|||1||MaizeGDB|;DP=396;ExcessHet=0;FS=0;InbreedingCoeff=0.5698;MLEAC=7;MLEA…	0/0	0/0	./.	0/0	0/0	0/0	0/0	0/0	0/0	0/0	0/0	0/0	0/0	1/1	0/0	0/0	0/0	0/0	0/0	0/0	0/0	0/0	0/0	0/0	0/0	0/0	1/1	./.	0/0	0/0	0/0	0/0	0/0	0/0	0/0	0/0	0/0	0/0	0/0	0/0	0/0	0/0	0/0	0/0
6	126300736	INS-6-126300736	A	AAT	AC=61;AF=0.391;AN=156;BaseQRankSum=-0.524;CSQ=AT|intron_variant|MODIFIER|phosphate%20transporter4|Zm00001d037468|Transcript|Zm00001d037468_T001|protein_coding||5/11||||||||||1||MaizeGDB|,AT|intron_variant|MODIFIER|phosphate%20transporter4|Zm00001d037468|Transcript|Zm00001d037468_T002|protein_coding||5/13||||||||||1||MaizeGDB|;DP=384;ExcessHet=0;FS=0;InbreedingCoeff=0.7216;MLEAC=66;MLEAF=0.423;MQ=…	0/0	0/0	./.	0/0	0/0	1/1	0/0	0/0	0/0	0/0	1/1	1/1	1/1	0/0	0/0	0/0	1/1	0/0	1/1	0/0	0/0	0/0	1/1	0/0	0/0	0/0	0/0	0/0	0/0	0/0	1/1	1/1	0/0	0/0	1/1	1/1	1/1	1/1	0/0	1/1	1/1	0/0	1/1	0/0
6	126300750	INS-6-126300750	T	TCTGAGATGTTTGTTTCTCG	AC=89;AF=0.578;AN=154;BaseQRankSum=-0.842;CSQ=CTGAGATGTTTGTTTCTCG|intron_variant|MODIFIER|phosphate%20transporter4|Zm00001d037468|Transcript|Zm00001d037468_T001|protein_coding||5/11||||||||||1||MaizeGDB|,CTGAGATGTTTGTTTCTCG|intron_variant|MODIFIER|phosphate%20transporter4|Zm00001d037468|Transcript|Zm00001d037468_T002|protein_coding||5/13||||||||||1||MaizeGDB|;DP=386;ExcessHet=0;FS=0;InbreedingCoe…	0/0	1/1	1/1	1/1	0/0	1/1	0/0	0/0	1/1	0/0	1/1	1/1	1/1	1/1	0/0	0/0	1/1	0/0	1/1	1/1	0/0	1/1	1/1	0/0	0/0	0/0	1/1	./.	0/0	1/1	1/1	1/1	1/1	0/0	1/1	1/1	1/1	1/1	0/0	1/1	1/1	0/0	1/1	0/0
6	126300776	SNP-6-126300776	A	C	AC=91;AF=0.599;AN=152;BaseQRankSum=-1.15;CSQ=C|intron_variant|MODIFIER|phosphate%20transporter4|Zm00001d037468|Transcript|Zm00001d037468_T001|protein_coding||5/11||||||||||1||MaizeGDB|,C|intron_variant|MODIFIER|phosphate%20transporter4|Zm00001d037468|Transcript|Zm00001d037468_T002|protein_coding||5/13||||||||||1||MaizeGDB|;DP=348;ExcessHet=0;FS=0;InbreedingCoeff=0.7724;MLEAC=98;MLEAF=0.645;MQ=60;…	0/0	1/1	1/1	1/1	0/0	1/1	0/0	0/0	1/1	./.	1/1	1/1	1/1	1/1	0/0	0/0	1/1	0/0	1/1	1/1	0/0	1/1	1/1	0/0	0/0	0/0	1/1	1/1	0/0	1/1	1/1	1/1	1/1	./.	1/1	1/1	1/1	1/1	0/0	1/1	1/1	0/0	1/1	0/0
6	126300861	SNP-6-126300861	A	G	AC=60;AF=0.39;AN=154;BaseQRankSum=0.431;CSQ=G|synonymous_variant|LOW|phosphate%20transporter4|Zm00001d037468|Transcript|Zm00001d037468_T001|protein_coding|6/12||||1131|1131|377|T|acA/acG|||1||MaizeGDB|,G|synonymous_variant|LOW|phosphate%20transporter4|Zm00001d037468|Transcript|Zm00001d037468_T002|protein_coding|6/14||||1014|957|319|T|acA/acG|||1||MaizeGDB|;DP=383;ExcessHet=0;FS=0;InbreedingCoeff=…	0/0	0/0	./.	0/0	0/0	1/1	0/0	0/0	0/0	0/1	1/1	./.	1/1	0/0	0/0	0/0	1/1	0/0	1/1	0/0	0/0	0/0	1/1	0/0	0/0	0/0	0/0	0/0	0/0	0/0	1/1	0/1	0/0	0/0	1/1	1/1	1/1	1/1	0/0	1/1	1/1	0/0	1/1	0/0
6	126300963	SNP-6-126300963	C	T	AC=65;AF=0.417;AN=156;BaseQRankSum=1.28;CSQ=T|intron_variant|MODIFIER|phosphate%20transporter4|Zm00001d037468|Transcript|Zm00001d037468_T001|protein_coding||6/11||||||||||1||MaizeGDB|,T|intron_variant|MODIFIER|phosphate%20transporter4|Zm00001d037468|Transcript|Zm00001d037468_T002|protein_coding||6/13||||||||||1||MaizeGDB|;DP=418;ExcessHet=0;FS=3.218;InbreedingCoeff=0.7706;MLEAC=67;MLEAF=0.429;MQ=…	0/0	0/0	0/0	0/0	0/0	1/1	0/0	0/1	0/0	1/1	1/1	1/1	1/1	0/0	0/0	0/0	1/1	0/0	1/1	0/0	0/0	0/0	1/1	0/0	0/0	0/0	0/0	0/0	0/0	0/0	1/1	0/1	0/0	0/0	1/1	1/1	1/1	1/1	0/0	1/1	1/1	0/0	1/1	0/0
6	126301181	SNP-6-126301181	T	G	AC=72;AF=0.468;AN=154;BaseQRankSum=0.431;CSQ=G|intron_variant|MODIFIER|phosphate%20transporter4|Zm00001d037468|Transcript|Zm00001d037468_T001|protein_coding||7/11||||||||||1||MaizeGDB|,G|intron_variant|MODIFIER|phosphate%20transporter4|Zm00001d037468|Transcript|Zm00001d037468_T002|protein_coding||7/13||||||||||1||MaizeGDB|;DP=379;ExcessHet=0;FS=6.525;InbreedingCoeff=0.7879;MLEAC=75;MLEAF=0.487;MQ…	0/0	0/0	0/0	1/1	0/0	1/1	0/0	0/0	0/0	0/1	1/1	1/1	1/1	1/1	0/0	0/0	1/1	0/0	1/1	0/0	0/0	0/0	1/1	0/0	0/0	0/0	1/1	1/1	0/0	0/0	1/1	0/1	0/0	0/0	1/1	1/1	1/1	1/1	0/0	1/1	1/1	0/0	1/1	0/0
6	126301224	DEL-6-126301224	TG	T	AC=59;AF=0.378;AN=156;BaseQRankSum=0.967;CSQ=-|splice_polypyrimidine_tract_variant&intron_variant|LOW|phosphate%20transporter4|Zm00001d037468|Transcript|Zm00001d037468_T001|protein_coding||7/11||||||||||1||MaizeGDB|,-|splice_polypyrimidine_tract_variant&intron_variant|LOW|phosphate%20transporter4|Zm00001d037468|Transcript|Zm00001d037468_T002|protein_coding||7/13||||||||||1||MaizeGDB|;DP=369;Exces…	0/0	0/0	0/0	0/0	0/0	1/1	0/0	0/0	0/0	0/0	./.	1/1	1/1	0/0	0/0	0/0	1/1	0/0	1/1	0/0	0/0	0/0	1/1	0/0	0/0	0/0	0/0	0/0	0/0	0/0	1/1	0/1	0/0	0/0	1/1	1/1	1/1	1/1	0/0	1/1	1/1	0/0	1/1	0/0
6	126301336	SNP-6-126301336	C	T	AC=23;AF=0.147;AN=156;BaseQRankSum=0;CSQ=T|synonymous_variant|LOW|phosphate%20transporter4|Zm00001d037468|Transcript|Zm00001d037468_T001|protein_coding|8/12||||1428|1428|476|F|ttC/ttT|||1||MaizeGDB|,T|synonymous_variant|LOW|phosphate%20transporter4|Zm00001d037468|Transcript|Zm00001d037468_T002|protein_coding|8/14||||1311|1254|418|F|ttC/ttT|||1||MaizeGDB|;DP=336;ExcessHet=0;FS=0;InbreedingCoeff=0.…	1/1	0/0	0/0	0/0	0/0	0/0	0/0	1/1	0/0	0/0	0/0	0/0	0/0	0/0	1/1	1/1	0/0	0/0	0/0	0/0	0/0	0/0	0/0	0/0	0/0	0/0	0/0	0/0	1/1	0/0	0/0	0/0	0/0	0/1	0/0	0/0	0/0	0/0	0/0	0/0	0/0	1/1	0/0	0/0
6	126301458	SNP-6-126301458	T	C	AC=96;AF=0.632;AN=152;CSQ=C|missense_variant|MODERATE|phosphate%20transporter4|Zm00001d037468|Transcript|Zm00001d037468_T001|protein_coding|8/12||||1550|1550|517|V/A|gTt/gCt|||1||MaizeGDB|,C|missense_variant|MODERATE|phosphate%20transporter4|Zm00001d037468|Transcript|Zm00001d037468_T002|protein_coding|8/14||||1433|1376|459|V/A|gTt/gCt|||1||MaizeGDB|;DP=364;ExcessHet=0;FS=0;InbreedingCoeff=0.8191;…	1/1	0/0	./.	./.	0/0	1/1	0/0	1/1	0/0	1/1	1/1	1/1	1/1	1/1	1/1	1/1	1/1	0/0	1/1	0/0	0/0	0/0	1/1	0/0	0/0	0/0	1/1	1/1	./.	0/0	1/1	1/1	0/0	0/0	1/1	1/1	1/1	1/1	0/0	1/1	1/1	1/1	1/1	0/0
6	126301556	SNP-6-126301556	C	T	AC=75;AF=0.487;AN=154;BaseQRankSum=-1.981;CSQ=T|splice_polypyrimidine_tract_variant&intron_variant|LOW|phosphate%20transporter4|Zm00001d037468|Transcript|Zm00001d037468_T001|protein_coding||8/11||||||||||1||MaizeGDB|,T|splice_polypyrimidine_tract_variant&intron_variant|LOW|phosphate%20transporter4|Zm00001d037468|Transcript|Zm00001d037468_T002|protein_coding||8/13||||||||||1||MaizeGDB|;DP=365;Exce…	0/0	0/0	0/0	1/1	0/0	1/1	0/0	0/1	0/0	1/1	1/1	1/1	1/1	1/1	0/0	0/0	1/1	0/0	1/1	0/0	0/0	0/0	1/1	0/0	0/0	0/0	1/1	1/1	0/0	0/0	1/1	1/1	0/0	0/0	1/1	1/1	1/1	1/1	0/0	1/1	1/1	0/0	1/1	0/0
6	126301590	SNP-6-126301590	C	T	AC=18;AF=0.117;AN=154;BaseQRankSum=0.792;CSQ=T|synonymous_variant|LOW|phosphate%20transporter4|Zm00001d037468|Transcript|Zm00001d037468_T001|protein_coding|9/12||||1602|1602|534|V|gtC/gtT|||1||MaizeGDB|,T|synonymous_variant|LOW|phosphate%20transporter4|Zm00001d037468|Transcript|Zm00001d037468_T002|protein_coding|9/14||||1485|1428|476|V|gtC/gtT|||1||MaizeGDB|;DP=357;ExcessHet=0;FS=3.99;InbreedingC…	1/1	0/0	0/0	0/0	0/0	0/0	0/0	0/1	0/0	0/0	0/0	0/0	0/0	0/0	1/1	./.	0/0	0/0	0/0	0/0	0/0	0/0	0/0	0/0	0/0	0/0	0/0	0/0	./.	0/0	0/0	0/0	0/0	0/1	0/0	0/0	0/0	0/0	0/0	0/0	0/0	1/1	0/0	0/0
6	126301828	SNP-6-126301828	A	C	AC=10;AF=0.063;AN=160;CSQ=C|intron_variant|MODIFIER|phosphate%20transporter4|Zm00001d037468|Transcript|Zm00001d037468_T001|protein_coding||9/11||||||||||1||MaizeGDB|,C|intron_variant|MODIFIER|phosphate%20transporter4|Zm00001d037468|Transcript|Zm00001d037468_T002|protein_coding||10/13||||||||||1||MaizeGDB|;DP=363;ExcessHet=0;FS=0;InbreedingCoeff=0.568;MLEAC=8;MLEAF=0.05;MQ=60;QD=23.88;SOR=1.302	0/0	0/0	0/0	0/0	0/0	0/0	0/0	0/0	0/0	0/0	0/0	0/0	0/0	1/1	0/0	0/0	0/0	0/0	0/0	0/0	0/0	0/0	0/0	0/0	0/0	0/0	1/1	0/0	0/0	0/0	0/0	0/0	0/0	0/0	0/0	0/0	0/0	0/0	0/0	0/0	0/0	0/0	0/0	0/0
6	126301844	SNP-6-126301844	T	A	AC=22;AF=0.139;AN=158;CSQ=A|intron_variant|MODIFIER|phosphate%20transporter4|Zm00001d037468|Transcript|Zm00001d037468_T001|protein_coding||9/11||||||||||1||MaizeGDB|,A|intron_variant|MODIFIER|phosphate%20transporter4|Zm00001d037468|Transcript|Zm00001d037468_T002|protein_coding||10/13||||||||||1||MaizeGDB|;DP=362;ExcessHet=0;FS=0;InbreedingCoeff=0.6973;MLEAC=22;MLEAF=0.139;MQ=60;QD=23.04;SOR=0.986	1/1	0/0	0/0	0/0	0/0	0/0	0/0	1/1	0/0	0/0	0/0	0/0	0/0	0/0	1/1	1/1	0/0	0/0	0/0	0/0	0/0	0/0	0/0	0/0	0/0	0/0	0/0	0/0	1/1	0/0	0/0	0/0	0/0	0/0	0/0	0/0	0/0	0/0	0/0	0/0	0/0	1/1	0/0	0/0
6	126301887	INS-6-126301887	T	TA	AC=96;AF=0.623;AN=154;CSQ=A|intron_variant|MODIFIER|phosphate%20transporter4|Zm00001d037468|Transcript|Zm00001d037468_T001|protein_coding||9/11||||||||||1||MaizeGDB|,A|intron_variant|MODIFIER|phosphate%20transporter4|Zm00001d037468|Transcript|Zm00001d037468_T002|protein_coding||10/13||||||||||1||MaizeGDB|;DP=386;ExcessHet=0;FS=0;InbreedingCoeff=0.8257;MLEAC=103;MLEAF=0.669;MQ=60;QD=27.37;SOR=0.844	1/1	0/0	0/0	1/1	0/0	1/1	0/0	1/1	0/0	1/1	1/1	1/1	1/1	1/1	1/1	1/1	1/1	0/0	1/1	0/0	./.	0/0	1/1	0/0	0/0	0/0	1/1	1/1	1/1	0/0	1/1	1/1	0/0	0/0	1/1	1/1	1/1	1/1	0/0	1/1	1/1	1/1	1/1	0/0
6	126301899	DEL-6-126301899	GTAAAATTAGCTATAGCTA	G	AC=60;AF=0.405;AN=148;CSQ=-|intron_variant|MODIFIER|phosphate%20transporter4|Zm00001d037468|Transcript|Zm00001d037468_T001|protein_coding||9/11||||||||||1||MaizeGDB|,-|intron_variant|MODIFIER|phosphate%20transporter4|Zm00001d037468|Transcript|Zm00001d037468_T002|protein_coding||10/13||||||||||1||MaizeGDB|;DP=380;ExcessHet=0;FS=0;InbreedingCoeff=0.72;MLEAC=70;MLEAF=0.473;MQ=60;QD=28.1;SOR=0.706	0/0	0/0	0/0	0/0	0/0	1/1	0/0	0/0	0/0	1/1	1/1	1/1	1/1	0/0	0/0	./.	1/1	0/0	1/1	0/0	./.	0/0	1/1	0/0	0/0	0/0	0/0	0/0	0/0	0/0	1/1	1/1	0/0	0/0	1/1	1/1	1/1	1/1	0/0	1/1	1/1	0/0	1/1	0/0
6	126301962	SNP-6-126301962	A	G	AC=72;AF=0.474;AN=152;CSQ=G|intron_variant|MODIFIER|phosphate%20transporter4|Zm00001d037468|Transcript|Zm00001d037468_T001|protein_coding||9/11||||||||||1||MaizeGDB|,G|intron_variant|MODIFIER|phosphate%20transporter4|Zm00001d037468|Transcript|Zm00001d037468_T002|protein_coding||10/13||||||||||1||MaizeGDB|;DP=377;ExcessHet=0;FS=0;InbreedingCoeff=0.8268;MLEAC=79;MLEAF=0.52;MQ=60;QD=27.54;SOR=0.713	0/0	0/0	0/0	1/1	0/0	1/1	0/0	0/0	0/0	1/1	1/1	1/1	1/1	1/1	0/0	0/0	1/1	0/0	1/1	0/0	0/0	0/0	1/1	0/0	0/0	0/0	1/1	1/1	0/0	0/0	1/1	1/1	0/0	0/0	1/1	1/1	1/1	1/1	0/0	1/1	1/1	0/0	1/1	0/0
6	126302004	SNP-6-126302004	T	A	AC=10;AF=0.064;AN=156;CSQ=A|intron_variant|MODIFIER|phosphate%20transporter4|Zm00001d037468|Transcript|Zm00001d037468_T001|protein_coding||9/11||||||||||1||MaizeGDB|,A|intron_variant|MODIFIER|phosphate%20transporter4|Zm00001d037468|Transcript|Zm00001d037468_T002|protein_coding||10/13||||||||||1||MaizeGDB|;DP=365;ExcessHet=0;FS=0;InbreedingCoeff=0.4962;MLEAC=8;MLEAF=0.051;MQ=60;QD=23.63;SOR=1.426	0/0	0/0	0/0	0/0	0/0	0/0	0/0	0/0	0/0	0/0	0/0	0/0	0/0	1/1	0/0	0/0	0/0	0/0	0/0	0/0	0/0	0/0	0/0	0/0	0/0	0/0	1/1	0/0	0/0	0/0	0/0	0/0	0/0	0/0	0/0	0/0	0/0	0/0	0/0	0/0	0/0	0/0	0/0	0/0
6	126302007	SNP-6-126302007	C	T	AC=22;AF=0.141;AN=156;BaseQRankSum=0;CSQ=T|intron_variant|MODIFIER|phosphate%20transporter4|Zm00001d037468|Transcript|Zm00001d037468_T001|protein_coding||9/11||||||||||1||MaizeGDB|,T|intron_variant|MODIFIER|phosphate%20transporter4|Zm00001d037468|Transcript|Zm00001d037468_T002|protein_coding||10/13||||||||||1||MaizeGDB|;DP=365;ExcessHet=0;FS=2.132;InbreedingCoeff=0.576;MLEAC=21;MLEAF=0.135;MQ=60;…	1/1	0/0	0/0	0/0	0/0	0/0	0/0	0/1	0/0	0/0	0/0	0/0	0/0	0/0	1/1	1/1	0/0	0/0	0/0	0/0	0/0	0/0	0/0	0/0	0/0	0/0	0/0	0/0	1/1	0/0	0/0	0/0	0/0	0/1	0/0	0/0	0/0	0/0	0/0	0/0	0/0	1/1	0/0	0/0
6	126302020	SNP-6-126302020	A	G	AC=58;AF=0.377;AN=154;BaseQRankSum=0.887;CSQ=G|intron_variant|MODIFIER|phosphate%20transporter4|Zm00001d037468|Transcript|Zm00001d037468_T001|protein_coding||9/11||||||||||1||MaizeGDB|,G|intron_variant|MODIFIER|phosphate%20transporter4|Zm00001d037468|Transcript|Zm00001d037468_T002|protein_coding||10/13||||||||||1||MaizeGDB|;DP=361;ExcessHet=0;FS=3.041;InbreedingCoeff=0.7775;MLEAC=60;MLEAF=0.39;MQ…	0/0	0/0	0/0	0/0	0/0	1/1	0/0	0/0	0/0	0/1	1/1	1/1	1/1	0/0	0/0	0/0	1/1	0/0	1/1	0/0	0/0	0/0	1/1	0/0	0/0	0/0	0/0	0/0	0/0	0/0	1/1	1/1	0/0	0/0	1/1	1/1	1/1	1/1	0/0	1/1	./.	0/0	1/1	0/0
6	126302047	SNP-6-126302047	G	C	AC=97;AF=0.622;AN=156;BaseQRankSum=0.319;CSQ=C|intron_variant|MODIFIER|phosphate%20transporter4|Zm00001d037468|Transcript|Zm00001d037468_T001|protein_coding||9/11||||||||||1||MaizeGDB|,C|intron_variant|MODIFIER|phosphate%20transporter4|Zm00001d037468|Transcript|Zm00001d037468_T002|protein_coding||10/13||||||||||1||MaizeGDB|;DP=378;ExcessHet=0;FS=3.438;InbreedingCoeff=0.8033;MLEAC=103;MLEAF=0.66;M…	1/1	0/0	0/0	1/1	0/0	1/1	0/0	1/1	0/0	1/1	1/1	1/1	1/1	1/1	1/1	1/1	1/1	0/0	1/1	0/0	0/0	0/0	1/1	0/0	0/0	0/0	1/1	1/1	1/1	0/0	1/1	1/1	0/0	0/0	1/1	1/1	1/1	1/1	0/0	1/1	1/1	1/1	1/1	0/0
6	126302053	SNP-6-126302053	G	A	AC=10;AF=0.064;AN=156;CSQ=A|intron_variant|MODIFIER|phosphate%20transporter4|Zm00001d037468|Transcript|Zm00001d037468_T001|protein_coding||9/11||||||||||1||MaizeGDB|,A|intron_variant|MODIFIER|phosphate%20transporter4|Zm00001d037468|Transcript|Zm00001d037468_T002|protein_coding||10/13||||||||||1||MaizeGDB|;DP=355;ExcessHet=0;FS=0;InbreedingCoeff=0.5565;MLEAC=9;MLEAF=0.058;MQ=60;QD=26.84;SOR=1.542	0/0	0/0	0/0	0/0	0/0	0/0	0/0	0/0	0/0	0/0	0/0	0/0	0/0	1/1	0/0	0/0	0/0	0/0	0/0	0/0	0/0	0/0	0/0	0/0	0/0	0/0	1/1	1/1	0/0	0/0	0/0	0/0	0/0	0/0	0/0	0/0	0/0	0/0	0/0	0/0	0/0	0/0	0/0	0/0
6	126302073	SNP-6-126302073	T	G	AC=23;AF=0.144;AN=160;BaseQRankSum=1.83;CSQ=G|intron_variant|MODIFIER|phosphate%20transporter4|Zm00001d037468|Transcript|Zm00001d037468_T001|protein_coding||9/11||||||||||1||MaizeGDB|,G|intron_variant|MODIFIER|phosphate%20transporter4|Zm00001d037468|Transcript|Zm00001d037468_T002|protein_coding||10/13||||||||||1||MaizeGDB|;DP=369;ExcessHet=0;FS=0;InbreedingCoeff=0.6572;MLEAC=21;MLEAF=0.131;MQ=60;…	1/1	0/0	0/0	0/0	0/0	0/0	0/0	1/1	0/0	0/1	0/0	0/0	0/0	0/0	1/1	1/1	0/0	0/0	0/0	0/0	0/0	0/0	0/0	0/0	0/0	0/0	0/0	0/0	1/1	0/0	0/0	0/0	0/0	0/0	0/0	0/0	0/0	0/0	0/0	0/0	0/0	1/1	0/0	0/0
6	126302100	SNP-6-126302100	G	C	AC=10;AF=0.063;AN=160;CSQ=C|intron_variant|MODIFIER|phosphate%20transporter4|Zm00001d037468|Transcript|Zm00001d037468_T001|protein_coding||9/11||||||||||1||MaizeGDB|,C|intron_variant|MODIFIER|phosphate%20transporter4|Zm00001d037468|Transcript|Zm00001d037468_T002|protein_coding||10/13||||||||||1||MaizeGDB|;DP=360;ExcessHet=0;FS=0;InbreedingCoeff=0.5409;MLEAC=7;MLEAF=0.044;MQ=60;QD=22.9;SOR=0.99	0/0	0/0	0/0	0/0	0/0	0/0	0/0	0/0	0/0	0/0	0/0	0/0	0/0	1/1	0/0	0/0	0/0	0/0	0/0	0/0	0/0	0/0	0/0	0/0	0/0	0/0	1/1	0/0	0/0	0/0	0/0	0/0	0/0	0/0	0/0	0/0	0/0	0/0	0/0	0/0	0/0	0/0	0/0	0/0
6	126302110	SNP-6-126302110	A	G	AC=23;AF=0.144;AN=160;BaseQRankSum=0.842;CSQ=G|intron_variant|MODIFIER|phosphate%20transporter4|Zm00001d037468|Transcript|Zm00001d037468_T001|protein_coding||9/11||||||||||1||MaizeGDB|,G|intron_variant|MODIFIER|phosphate%20transporter4|Zm00001d037468|Transcript|Zm00001d037468_T002|protein_coding||10/13||||||||||1||MaizeGDB|;DP=372;ExcessHet=0;FS=2.13;InbreedingCoeff=0.6792;MLEAC=21;MLEAF=0.131;MQ…	1/1	0/0	0/0	0/0	0/0	0/0	0/0	1/1	0/0	0/1	0/0	0/0	0/0	0/0	1/1	1/1	0/0	0/0	0/0	0/0	0/0	0/0	0/0	0/0	0/0	0/0	0/0	0/0	1/1	0/0	0/0	0/0	0/0	0/0	0/0	0/0	0/0	0/0	0/0	0/0	0/0	1/1	0/0	0/0
6	126302130	DEL-6-126302130	TATCTGAGTTACAACTCGAC	T	AC=21;AF=0.135;AN=156;BaseQRankSum=1.07;CSQ=-|intron_variant|MODIFIER|phosphate%20transporter4|Zm00001d037468|Transcript|Zm00001d037468_T001|protein_coding||9/11||||||||||1||MaizeGDB|,-|intron_variant|MODIFIER|phosphate%20transporter4|Zm00001d037468|Transcript|Zm00001d037468_T002|protein_coding||10/13||||||||||1||MaizeGDB|;DP=385;ExcessHet=0;FS=1.724;InbreedingCoeff=0.69;MLEAC=21;MLEAF=0.135;MQ=6…	./.	0/0	0/0	0/0	0/0	0/0	0/0	1/1	0/0	0/1	0/0	0/0	0/0	0/0	1/1	1/1	0/0	0/0	0/0	0/0	0/0	0/0	./.	0/0	0/0	0/0	0/0	0/0	1/1	0/0	0/0	0/0	0/0	0/0	0/0	0/0	0/0	0/0	0/0	0/0	0/0	1/1	0/0	0/0
6	126302200	DEL-6-126302200	AG	A	AC=23;AF=0.146;AN=158;BaseQRankSum=0.524;CSQ=-|intron_variant|MODIFIER|phosphate%20transporter4|Zm00001d037468|Transcript|Zm00001d037468_T001|protein_coding||9/11||||||||||1||MaizeGDB|,-|intron_variant|MODIFIER|phosphate%20transporter4|Zm00001d037468|Transcript|Zm00001d037468_T002|protein_coding||10/13||||||||||1||MaizeGDB|;DP=391;ExcessHet=0;FS=2.124;InbreedingCoeff=0.6809;MLEAC=22;MLEAF=0.139;M…	1/1	0/0	0/0	0/0	0/0	0/0	0/0	1/1	0/0	0/0	0/0	0/0	0/0	0/0	1/1	1/1	0/0	./.	0/0	0/0	0/0	0/0	0/0	0/0	0/0	0/0	0/0	0/0	1/1	0/0	0/0	0/0	0/0	0/1	0/0	0/0	0/0	0/0	0/0	0/0	0/0	1/1	0/0	0/0
6	126302233	INS-6-126302233	G	GT	AC=9;AF=0.058;AN=154;BaseQRankSum=-0.674;CSQ=T|intron_variant|MODIFIER|phosphate%20transporter4|Zm00001d037468|Transcript|Zm00001d037468_T001|protein_coding||9/11||||||||||1||MaizeGDB|,T|intron_variant|MODIFIER|phosphate%20transporter4|Zm00001d037468|Transcript|Zm00001d037468_T002|protein_coding||10/13||||||||||1||MaizeGDB|;DP=429;ExcessHet=1.0901;FS=30.588;InbreedingCoeff=0.0082;MLEAC=10;MLEAF=0…	0/0	0/0	0/0	0/0	0/0	0/0	0/0	0/0	0/0	0/0	0/0	0/1	0/0	0/0	0/0	0/0	0/1	0/0	0/0	0/0	0/0	0/0	0/0	0/0	0/0	0/0	0/0	0/0	0/0	0/0	0/0	0/0	0/0	0/0	0/0	0/1	0/1	0/0	0/0	0/0	0/0	0/0	0/0	0/0
6	126302251	SNP-6-126302251	T	C	AC=21;AF=0.131;AN=160;BaseQRankSum=0.157;CSQ=C|intron_variant|MODIFIER|phosphate%20transporter4|Zm00001d037468|Transcript|Zm00001d037468_T001|protein_coding||9/11||||||||||1||MaizeGDB|,C|intron_variant|MODIFIER|phosphate%20transporter4|Zm00001d037468|Transcript|Zm00001d037468_T002|protein_coding||10/13||||||||||1||MaizeGDB|;DP=408;ExcessHet=0;FS=0;InbreedingCoeff=0.6003;MLEAC=20;MLEAF=0.125;MQ=58…	1/1	0/0	0/0	0/0	0/0	0/0	0/0	0/1	0/0	0/0	0/0	0/0	0/0	0/0	1/1	1/1	0/0	0/0	0/0	0/0	0/0	0/0	0/0	0/0	0/0	0/0	0/0	0/0	1/1	0/0	0/0	0/0	0/0	0/1	0/0	0/0	0/0	0/0	0/0	0/0	0/0	1/1	0/0	0/0
6	126302267	SNP-6-126302267	C	T	AC=96;AF=0.615;AN=156;BaseQRankSum=0;CSQ=T|intron_variant|MODIFIER|phosphate%20transporter4|Zm00001d037468|Transcript|Zm00001d037468_T001|protein_coding||9/11||||||||||1||MaizeGDB|,T|intron_variant|MODIFIER|phosphate%20transporter4|Zm00001d037468|Transcript|Zm00001d037468_T002|protein_coding||10/13||||||||||1||MaizeGDB|;DP=411;ExcessHet=0;FS=1.771;InbreedingCoeff=0.7557;MLEAC=101;MLEAF=0.647;MQ=5…	1/1	0/0	0/0	1/1	0/0	1/1	0/0	1/1	0/0	1/1	1/1	1/1	1/1	1/1	1/1	1/1	1/1	0/0	1/1	0/0	0/0	0/0	1/1	0/0	0/0	0/0	1/1	1/1	1/1	0/0	1/1	./.	0/0	0/1	1/1	1/1	1/1	1/1	0/0	1/1	1/1	1/1	1/1	0/0
6	126302277	SNP-6-126302277	A	G	AC=23;AF=0.146;AN=158;BaseQRankSum=1.04;CSQ=G|intron_variant|MODIFIER|phosphate%20transporter4|Zm00001d037468|Transcript|Zm00001d037468_T001|protein_coding||9/11||||||||||1||MaizeGDB|,G|intron_variant|MODIFIER|phosphate%20transporter4|Zm00001d037468|Transcript|Zm00001d037468_T002|protein_coding||10/13||||||||||1||MaizeGDB|;DP=370;ExcessHet=0;FS=0;InbreedingCoeff=0.6465;MLEAC=22;MLEAF=0.139;MQ=60;…	1/1	0/0	0/0	0/0	0/0	0/0	0/0	1/1	0/0	0/0	0/0	0/0	0/0	0/0	1/1	1/1	0/0	0/0	0/0	0/0	0/0	0/0	0/0	0/0	0/0	0/0	0/0	0/0	1/1	0/0	0/0	0/0	0/0	0/1	0/0	0/0	0/0	0/0	0/0	0/0	0/0	1/1	0/0	0/0
6	126302282	SNP-6-126302282	C	T	AC=74;AF=0.474;AN=156;CSQ=T|intron_variant|MODIFIER|phosphate%20transporter4|Zm00001d037468|Transcript|Zm00001d037468_T001|protein_coding||9/11||||||||||1||MaizeGDB|,T|intron_variant|MODIFIER|phosphate%20transporter4|Zm00001d037468|Transcript|Zm00001d037468_T002|protein_coding||10/13||||||||||1||MaizeGDB|;DP=377;ExcessHet=0;FS=0;InbreedingCoeff=0.8122;MLEAC=76;MLEAF=0.487;MQ=60;QD=33.1;SOR=0.981	0/0	0/0	0/0	1/1	0/0	1/1	0/0	0/0	0/0	1/1	1/1	1/1	1/1	1/1	0/0	0/0	1/1	0/0	1/1	0/0	0/0	0/0	1/1	0/0	0/0	0/0	1/1	1/1	0/0	0/0	1/1	./.	0/0	0/0	1/1	1/1	1/1	1/1	0/0	1/1	1/1	0/0	1/1	0/0
6	126302290	SNP-6-126302290	G	T	AC=32;AF=0.205;AN=156;BaseQRankSum=-1.282;CSQ=T|intron_variant|MODIFIER|phosphate%20transporter4|Zm00001d037468|Transcript|Zm00001d037468_T001|protein_coding||9/11||||||||||1||MaizeGDB|,T|intron_variant|MODIFIER|phosphate%20transporter4|Zm00001d037468|Transcript|Zm00001d037468_T002|protein_coding||10/13||||||||||1||MaizeGDB|;DP=365;ExcessHet=0;FS=0;InbreedingCoeff=0.6955;MLEAC=30;MLEAF=0.192;MQ=6…	1/1	0/0	./.	0/0	0/0	0/0	0/0	0/1	0/0	0/0	0/0	0/0	0/0	1/1	1/1	1/1	0/0	0/0	0/0	0/0	0/0	0/0	0/0	0/0	0/0	./.	1/1	0/0	1/1	0/0	0/0	0/0	0/0	0/1	0/0	0/0	0/0	0/0	0/0	0/0	0/0	1/1	0/0	0/0
6	126302294	SNP-6-126302294	C	T	AC=22;AF=0.143;AN=154;BaseQRankSum=-0.21;CSQ=T|intron_variant|MODIFIER|phosphate%20transporter4|Zm00001d037468|Transcript|Zm00001d037468_T001|protein_coding||9/11||||||||||1||MaizeGDB|,T|intron_variant|MODIFIER|phosphate%20transporter4|Zm00001d037468|Transcript|Zm00001d037468_T002|protein_coding||10/13||||||||||1||MaizeGDB|;DP=368;ExcessHet=0;FS=0;InbreedingCoeff=0.6021;MLEAC=21;MLEAF=0.136;MQ=60…	1/1	0/0	./.	0/0	0/0	0/0	0/0	0/1	0/0	0/0	0/0	0/0	0/0	0/0	1/1	1/1	0/0	0/0	0/0	0/0	0/0	0/0	0/0	0/0	0/0	./.	0/0	0/0	1/1	0/0	0/0	0/0	0/0	0/1	0/0	0/0	0/0	0/0	0/0	0/0	0/0	1/1	0/0	0/0
6	126302314	SNP-6-126302314	G	A	AC=22;AF=0.141;AN=156;BaseQRankSum=-1.15;CSQ=A|intron_variant|MODIFIER|phosphate%20transporter4|Zm00001d037468|Transcript|Zm00001d037468_T001|protein_coding||9/11||||||||||1||MaizeGDB|,A|intron_variant|MODIFIER|phosphate%20transporter4|Zm00001d037468|Transcript|Zm00001d037468_T002|protein_coding||10/13||||||||||1||MaizeGDB|;DP=365;ExcessHet=0;FS=0;InbreedingCoeff=0.617;MLEAC=20;MLEAF=0.128;MQ=60;…	1/1	0/0	0/0	0/0	0/0	0/0	0/0	0/1	0/0	0/0	0/0	0/0	0/0	0/0	1/1	1/1	0/0	0/0	0/0	0/0	0/0	0/0	0/0	0/0	0/0	./.	0/0	0/0	1/1	0/0	0/0	0/0	0/0	0/1	0/0	0/0	0/0	0/0	0/0	0/0	0/0	1/1	0/0	0/0
6	126302356	SNP-6-126302356	A	G	AC=74;AF=0.487;AN=152;CSQ=G|intron_variant|MODIFIER|phosphate%20transporter4|Zm00001d037468|Transcript|Zm00001d037468_T001|protein_coding||9/11||||||||||1||MaizeGDB|,G|intron_variant|MODIFIER|phosphate%20transporter4|Zm00001d037468|Transcript|Zm00001d037468_T002|protein_coding||10/13||||||||||1||MaizeGDB|;DP=362;ExcessHet=0;FS=0;InbreedingCoeff=0.8032;MLEAC=80;MLEAF=0.526;MQ=60;QD=27.78;SOR=0.885	0/0	0/0	0/0	1/1	0/0	1/1	0/0	0/0	0/0	1/1	1/1	./.	1/1	1/1	0/0	0/0	1/1	0/0	1/1	0/0	0/0	0/0	1/1	0/0	0/0	./.	1/1	1/1	0/0	0/0	1/1	0/0	0/0	0/0	1/1	1/1	1/1	1/1	0/0	1/1	1/1	0/0	1/1	0/0
6	126302358	SNP-6-126302358	C	T	AC=18;AF=0.122;AN=148;CSQ=T|intron_variant|MODIFIER|phosphate%20transporter4|Zm00001d037468|Transcript|Zm00001d037468_T001|protein_coding||9/11||||||||||1||MaizeGDB|,T|intron_variant|MODIFIER|phosphate%20transporter4|Zm00001d037468|Transcript|Zm00001d037468_T002|protein_coding||10/13||||||||||1||MaizeGDB|;DP=355;ExcessHet=0;FS=0;InbreedingCoeff=0.642;MLEAC=18;MLEAF=0.122;MQ=60;QD=22.85;SOR=1.022	./.	0/0	0/0	0/0	0/0	0/0	0/0	1/1	0/0	0/0	0/0	0/0	0/0	0/0	1/1	1/1	0/0	0/0	0/0	0/0	0/0	0/0	0/0	0/0	./.	./.	0/0	0/0	1/1	0/0	0/0	0/0	0/0	0/0	0/0	0/0	0/0	0/0	0/0	0/0	0/0	1/1	0/0	0/0
6	126302502	SNP-6-126302502	C	T	AC=73;AF=0.468;AN=156;BaseQRankSum=-0.524;CSQ=T|intron_variant|MODIFIER|phosphate%20transporter4|Zm00001d037468|Transcript|Zm00001d037468_T001|protein_coding||9/11||||||||||1||MaizeGDB|,T|synonymous_variant|LOW|phosphate%20transporter4|Zm00001d037468|Transcript|Zm00001d037468_T002|protein_coding|11/14||||1719|1662|554|D|gaC/gaT|||1||MaizeGDB|;DP=382;ExcessHet=0;FS=2.06;InbreedingCoeff=0.7487;MLEA…	0/0	0/0	0/0	1/1	0/0	1/1	0/0	0/0	0/0	0/1	1/1	1/1	1/1	1/1	0/0	0/0	1/1	0/0	1/1	0/0	0/0	0/0	./.	0/0	0/0	0/0	1/1	1/1	0/0	0/0	1/1	0/1	0/0	0/0	1/1	1/1	1/1	1/1	0/0	1/1	1/1	0/0	1/1	0/0
6	126302606	INS-6-126302606	G	GACATGCTC	AC=58;AF=0.382;AN=152;BaseQRankSum=0;CSQ=ACATGCTC|intron_variant|MODIFIER|phosphate%20transporter4|Zm00001d037468|Transcript|Zm00001d037468_T001|protein_coding||9/11||||||||||1||MaizeGDB|,ACATGCTC|intron_variant|MODIFIER|phosphate%20transporter4|Zm00001d037468|Transcript|Zm00001d037468_T002|protein_coding||11/13||||||||||1||MaizeGDB|;DP=388;ExcessHet=0;FS=0;InbreedingCoeff=0.7711;MLEAC=59;MLEAF=0…	0/0	0/0	0/0	0/0	0/0	0/0	0/0	0/0	0/0	0/1	1/1	1/1	1/1	0/0	0/0	0/0	1/1	0/0	1/1	0/0	0/0	0/0	1/1	0/0	0/0	./.	0/0	0/0	0/0	0/0	1/1	0/1	0/0	0/0	1/1	1/1	1/1	1/1	0/0	1/1	1/1	0/0	./.	0/0
6	126302617	DEL-6-126302617	CA	C	AC=68;AF=0.453;AN=150;BaseQRankSum=1.18;CSQ=-|intron_variant|MODIFIER|phosphate%20transporter4|Zm00001d037468|Transcript|Zm00001d037468_T001|protein_coding||9/11||||||||||1||MaizeGDB|,-|intron_variant|MODIFIER|phosphate%20transporter4|Zm00001d037468|Transcript|Zm00001d037468_T002|protein_coding||11/13||||||||||1||MaizeGDB|;DP=382;ExcessHet=0;FS=3.032;InbreedingCoeff=0.7911;MLEAC=72;MLEAF=0.48;MQ=…	0/0	0/0	0/0	1/1	0/0	0/0	0/0	0/0	0/0	0/1	1/1	1/1	1/1	1/1	0/0	0/0	1/1	0/0	1/1	0/0	0/0	0/0	1/1	0/0	0/0	./.	./.	1/1	0/0	0/0	1/1	0/1	0/0	0/0	1/1	1/1	1/1	1/1	0/0	1/1	1/1	0/0	./.	0/0
6	126302646	SNP-6-126302646	A	C	AC=21;AF=0.133;AN=158;BaseQRankSum=-1.465;CSQ=C|intron_variant|MODIFIER|phosphate%20transporter4|Zm00001d037468|Transcript|Zm00001d037468_T001|protein_coding||9/11||||||||||1||MaizeGDB|,C|intron_variant|MODIFIER|phosphate%20transporter4|Zm00001d037468|Transcript|Zm00001d037468_T002|protein_coding||11/13||||||||||1||MaizeGDB|,C|upstream_gene_variant|MODIFIER||Zm00001d037469|Transcript|Zm00001d0374…	1/1	0/0	0/0	0/0	0/0	0/0	0/0	./.	0/0	0/1	0/0	0/0	0/0	0/0	1/1	1/1	0/0	0/0	0/0	0/0	0/0	0/0	0/0	0/0	0/0	0/0	0/0	0/0	1/1	0/0	0/0	0/0	0/0	0/0	0/0	0/0	0/0	0/0	0/0	0/0	0/0	1/1	0/0	0/0
6	126302851	SNP-6-126302851	G	A	AC=10;AF=0.063;AN=158;CSQ=A|splice_region_variant&splice_polypyrimidine_tract_variant&intron_variant|LOW|phosphate%20transporter4|Zm00001d037468|Transcript|Zm00001d037468_T001|protein_coding||9/11||||||||||1||MaizeGDB|,A|intron_variant|MODIFIER|phosphate%20transporter4|Zm00001d037468|Transcript|Zm00001d037468_T002|protein_coding||11/13||||||||||1||MaizeGDB|,A|upstream_gene_variant|MODIFIER||Zm000…	0/0	0/0	0/0	0/0	0/0	0/0	0/0	0/0	0/0	0/0	0/0	0/0	0/0	1/1	0/0	0/0	0/0	0/0	0/0	0/0	0/0	0/0	0/0	0/0	0/0	./.	1/1	0/0	0/0	0/0	0/0	0/0	0/0	0/0	0/0	0/0	0/0	0/0	0/0	0/0	0/0	0/0	0/0	0/0
6	126302968	SNP-6-126302968	A	C	AC=62;AF=0.392;AN=158;BaseQRankSum=1.5;CSQ=C|synonymous_variant|LOW|phosphate%20transporter4|Zm00001d037468|Transcript|Zm00001d037468_T001|protein_coding|10/12||||1803|1803|601|G|ggA/ggC|||1||MaizeGDB|,C|synonymous_variant|LOW|phosphate%20transporter4|Zm00001d037468|Transcript|Zm00001d037468_T002|protein_coding|12/14||||1851|1794|598|G|ggA/ggC|||1||MaizeGDB|,C|upstream_gene_variant|MODIFIER||Zm00…	0/0	0/0	0/0	0/0	0/0	1/1	0/0	0/0	0/0	0/1	1/1	1/1	1/1	0/0	0/0	0/0	0/1	0/0	1/1	0/0	0/0	0/0	1/1	0/0	0/0	0/0	0/0	0/0	0/0	0/0	1/1	1/1	0/0	0/0	1/1	1/1	1/1	1/1	0/0	1/1	1/1	0/0	1/1	0/0
6	126303016	SNP-6-126303016	T	C	AC=23;AF=0.146;AN=158;BaseQRankSum=1.28;CSQ=C|synonymous_variant|LOW|phosphate%20transporter4|Zm00001d037468|Transcript|Zm00001d037468_T001|protein_coding|10/12||||1851|1851|617|L|ctT/ctC|||1||MaizeGDB|,C|synonymous_variant|LOW|phosphate%20transporter4|Zm00001d037468|Transcript|Zm00001d037468_T002|protein_coding|12/14||||1899|1842|614|L|ctT/ctC|||1||MaizeGDB|,C|upstream_gene_variant|MODIFIER||Zm0…	1/1	0/0	0/0	0/0	0/0	0/0	0/0	1/1	0/0	0/1	0/0	0/0	0/0	0/0	1/1	1/1	0/0	0/0	0/0	0/0	0/0	0/0	0/0	0/0	0/0	0/0	0/0	0/0	1/1	0/0	0/0	0/0	0/0	./.	0/0	0/0	0/0	0/0	0/0	0/0	0/0	1/1	0/0	0/0
6	126303155	SNP-6-126303155	G	A	AC=73;AF=0.48;AN=152;BaseQRankSum=0.319;CSQ=A|missense_variant|MODERATE|phosphate%20transporter4|Zm00001d037468|Transcript|Zm00001d037468_T001|protein_coding|10/12||||1990|1990|664|V/I|Gta/Ata|||1||MaizeGDB|,A|missense_variant|MODERATE|phosphate%20transporter4|Zm00001d037468|Transcript|Zm00001d037468_T002|protein_coding|12/14||||2038|1981|661|V/I|Gta/Ata|||1||MaizeGDB|,A|upstream_gene_variant|MOD…	0/0	0/0	0/0	1/1	0/0	1/1	0/0	0/0	0/0	0/1	1/1	1/1	./.	1/1	0/0	0/0	1/1	./.	1/1	0/0	0/0	0/0	1/1	0/0	0/0	0/0	1/1	1/1	0/0	0/0	1/1	1/1	0/0	0/0	1/1	1/1	1/1	1/1	0/0	1/1	1/1	0/0	1/1	0/0
6	126303207	DEL-6-126303207	CA	C	AC=10;AF=0.063;AN=158;CSQ=-|intron_variant|MODIFIER|phosphate%20transporter4|Zm00001d037468|Transcript|Zm00001d037468_T001|protein_coding||10/11||||||||||1||MaizeGDB|,-|intron_variant|MODIFIER|phosphate%20transporter4|Zm00001d037468|Transcript|Zm00001d037468_T002|protein_coding||12/13||||||||||1||MaizeGDB|,-|upstream_gene_variant|MODIFIER||Zm00001d037469|Transcript|Zm00001d037469_T001|tRNA|||||||…	0/0	0/0	0/0	0/0	0/0	0/0	0/0	0/0	0/0	0/0	0/0	0/0	0/0	1/1	0/0	0/0	0/0	0/0	0/0	0/0	0/0	0/0	0/0	0/0	0/0	0/0	1/1	0/0	0/0	0/0	0/0	0/0	0/0	0/0	0/0	0/0	0/0	0/0	0/0	0/0	0/0	0/0	0/0	0/0
6	126303233	SNP-6-126303233	A	G	AC=21;AF=0.135;AN=156;BaseQRankSum=-0.598;CSQ=G|splice_polypyrimidine_tract_variant&intron_variant|LOW|phosphate%20transporter4|Zm00001d037468|Transcript|Zm00001d037468_T001|protein_coding||10/11||||||||||1||MaizeGDB|,G|splice_polypyrimidine_tract_variant&intron_variant|LOW|phosphate%20transporter4|Zm00001d037468|Transcript|Zm00001d037468_T002|protein_coding||12/13||||||||||1||MaizeGDB|,G|upstrea…	1/1	0/0	0/0	0/0	0/0	0/0	0/0	1/1	0/0	0/1	0/0	0/0	0/0	0/0	./.	1/1	0/0	0/0	0/0	0/0	0/0	0/0	0/0	0/0	0/0	0/0	0/0	0/0	1/1	0/0	0/0	0/0	0/0	0/0	0/0	0/0	0/0	0/0	0/0	0/0	0/0	1/1	0/0	0/0
6	126303406	SNP-6-126303406	C	T	AC=71;AF=0.467;AN=152;BaseQRankSum=-1.383;CSQ=T|intron_variant|MODIFIER|phosphate%20transporter4|Zm00001d037468|Transcript|Zm00001d037468_T001|protein_coding||11/11||||||||||1||MaizeGDB|,T|intron_variant|MODIFIER|phosphate%20transporter4|Zm00001d037468|Transcript|Zm00001d037468_T002|protein_coding||13/13||||||||||1||MaizeGDB|,T|upstream_gene_variant|MODIFIER||Zm00001d037469|Transcript|Zm00001d037…	0/0	0/0	0/0	1/1	0/0	1/1	0/0	0/0	0/0	0/0	1/1	1/1	1/1	1/1	0/0	0/0	./.	0/0	1/1	0/0	0/0	0/0	1/1	0/0	0/0	0/0	1/1	1/1	0/0	0/0	1/1	1/1	0/0	0/0	1/1	1/1	./.	1/1	0/0	1/1	./.	0/0	1/1	0/0
6	126303418	SNP-6-126303418	G	A	AC=71;AF=0.461;AN=154;BaseQRankSum=-1.383;CSQ=A|intron_variant|MODIFIER|phosphate%20transporter4|Zm00001d037468|Transcript|Zm00001d037468_T001|protein_coding||11/11||||||||||1||MaizeGDB|,A|intron_variant|MODIFIER|phosphate%20transporter4|Zm00001d037468|Transcript|Zm00001d037468_T002|protein_coding||13/13||||||||||1||MaizeGDB|,A|upstream_gene_variant|MODIFIER||Zm00001d037469|Transcript|Zm00001d037…	0/0	0/0	0/0	1/1	0/0	1/1	0/0	0/0	0/0	0/0	1/1	1/1	1/1	1/1	0/0	0/0	./.	0/0	1/1	0/0	0/0	0/0	1/1	0/0	0/0	0/0	1/1	1/1	0/0	0/0	1/1	1/1	0/0	0/0	1/1	1/1	./.	1/1	0/0	1/1	./.	0/0	1/1	0/0
6	126303429	SNP-6-126303429	G	A	AC=10;AF=0.063;AN=160;CSQ=A|intron_variant|MODIFIER|phosphate%20transporter4|Zm00001d037468|Transcript|Zm00001d037468_T001|protein_coding||11/11||||||||||1||MaizeGDB|,A|intron_variant|MODIFIER|phosphate%20transporter4|Zm00001d037468|Transcript|Zm00001d037468_T002|protein_coding||13/13||||||||||1||MaizeGDB|,A|upstream_gene_variant|MODIFIER||Zm00001d037469|Transcript|Zm00001d037469_T001|tRNA|||||||…	0/0	0/0	0/0	0/0	0/0	0/0	0/0	0/0	0/0	0/0	0/0	0/0	0/0	1/1	0/0	0/0	0/0	0/0	0/0	0/0	0/0	0/0	0/0	0/0	0/0	0/0	1/1	0/0	0/0	0/0	0/0	0/0	0/0	0/0	0/0	0/0	0/0	0/0	0/0	0/0	0/0	0/0	0/0	0/0
6	126303656	SNP-6-126303656	T	C	AC=94;AF=0.627;AN=150;BaseQRankSum=0.253;CSQ=C|3_prime_UTR_variant|MODIFIER|phosphate%20transporter4|Zm00001d037468|Transcript|Zm00001d037468_T001|protein_coding|12/12||||2310|||||||1||MaizeGDB|,C|3_prime_UTR_variant|MODIFIER|phosphate%20transporter4|Zm00001d037468|Transcript|Zm00001d037468_T002|protein_coding|14/14||||2358|||||||1||MaizeGDB|,C|upstream_gene_variant|MODIFIER||Zm00001d037469|Trans…	1/1	0/0	0/0	1/1	./.	1/1	0/0	1/1	0/0	1/1	1/1	1/1	1/1	1/1	1/1	1/1	./.	0/0	1/1	0/0	0/0	0/0	1/1	0/0	0/0	0/0	1/1	1/1	./.	0/0	1/1	1/1	0/0	0/1	1/1	1/1	1/1	1/1	0/0	1/1	1/1	1/1	1/1	0/0
6	126303659	SNP-6-126303659	A	C	AC=73;AF=0.487;AN=150;BaseQRankSum=1.28;CSQ=C|3_prime_UTR_variant|MODIFIER|phosphate%20transporter4|Zm00001d037468|Transcript|Zm00001d037468_T001|protein_coding|12/12||||2313|||||||1||MaizeGDB|,C|3_prime_UTR_variant|MODIFIER|phosphate%20transporter4|Zm00001d037468|Transcript|Zm00001d037468_T002|protein_coding|14/14||||2361|||||||1||MaizeGDB|,C|upstream_gene_variant|MODIFIER||Zm00001d037469|Transc…	0/0	0/0	0/0	1/1	./.	1/1	0/0	0/0	0/0	1/1	1/1	1/1	1/1	1/1	0/0	0/0	./.	0/0	1/1	0/0	0/0	0/0	1/1	0/0	0/0	0/0	1/1	1/1	./.	0/0	1/1	1/1	0/0	0/0	1/1	1/1	1/1	1/1	0/0	1/1	1/1	0/0	1/1	0/0
6	126303682	INS-6-126303682	A	AT	AC=94;AF=0.618;AN=152;CSQ=T|3_prime_UTR_variant|MODIFIER|phosphate%20transporter4|Zm00001d037468|Transcript|Zm00001d037468_T001|protein_coding|12/12||||2336-2337|||||||1||MaizeGDB|,T|3_prime_UTR_variant|MODIFIER|phosphate%20transporter4|Zm00001d037468|Transcript|Zm00001d037468_T002|protein_coding|14/14||||2384-2385|||||||1||MaizeGDB|,T|upstream_gene_variant|MODIFIER||Zm00001d037469|Transcript|Zm0…	1/1	0/0	0/0	1/1	0/0	1/1	0/0	1/1	0/0	1/1	1/1	1/1	1/1	1/1	1/1	1/1	./.	0/0	1/1	0/0	0/0	0/0	1/1	0/0	0/0	0/0	1/1	1/1	./.	0/0	1/1	1/1	0/0	0/0	1/1	1/1	1/1	1/1	0/0	1/1	1/1	1/1	1/1	0/0
6	126303709	SNP-6-126303709	C	A	AC=78;AF=0.5;AN=156;CSQ=A|3_prime_UTR_variant|MODIFIER|phosphate%20transporter4|Zm00001d037468|Transcript|Zm00001d037468_T001|protein_coding|12/12||||2363|||||||1||MaizeGDB|,A|3_prime_UTR_variant|MODIFIER|phosphate%20transporter4|Zm00001d037468|Transcript|Zm00001d037468_T002|protein_coding|14/14||||2411|||||||1||MaizeGDB|,A|upstream_gene_variant|MODIFIER||Zm00001d037469|Transcript|Zm00001d037469_…	0/0	0/0	0/0	1/1	0/0	1/1	0/0	0/0	0/0	1/1	1/1	1/1	1/1	1/1	0/0	0/0	1/1	0/0	1/1	0/0	0/0	0/0	1/1	0/0	0/0	0/0	1/1	1/1	0/0	0/0	1/1	1/1	0/0	0/0	1/1	1/1	1/1	1/1	0/0	1/1	1/1	./.	1/1	0/0
6	126303714	SNP-6-126303714	C	A	AC=78;AF=0.5;AN=156;CSQ=A|3_prime_UTR_variant|MODIFIER|phosphate%20transporter4|Zm00001d037468|Transcript|Zm00001d037468_T001|protein_coding|12/12||||2368|||||||1||MaizeGDB|,A|3_prime_UTR_variant|MODIFIER|phosphate%20transporter4|Zm00001d037468|Transcript|Zm00001d037468_T002|protein_coding|14/14||||2416|||||||1||MaizeGDB|,A|upstream_gene_variant|MODIFIER||Zm00001d037469|Transcript|Zm00001d037469_…	0/0	0/0	0/0	1/1	0/0	1/1	0/0	0/0	0/0	1/1	1/1	1/1	1/1	1/1	0/0	0/0	1/1	0/0	1/1	0/0	0/0	0/0	1/1	0/0	0/0	0/0	1/1	1/1	0/0	0/0	1/1	1/1	0/0	0/0	1/1	1/1	1/1	1/1	0/0	1/1	1/1	./.	1/1	0/0
8	3994634	SNP-8-3994634	C	T	AC=82;AF=0.539;AN=152;BaseQRankSum=-0.674;CSQ=T|splice_donor_region_variant&intron_variant|LOW||Zm00001d008284|Transcript|Zm00001d008284_T001|protein_coding||5/5||||||||||-1|||,T|splice_donor_region_variant&intron_variant|LOW||Zm00001d008284|Transcript|Zm00001d008284_T002|protein_coding||5/5||||||||||-1|||,T|splice_donor_region_variant&intron_variant|LOW||Zm00001d008284|Transcript|Zm00001d008284_…	0/0	0/0	0/0	1/1	1/1	1/1	1/1	0/0	0/0	0/1	0/1	1/1	0/0	./.	0/0	0/0	0/0	0/0	1/1	1/1	0/0	0/0	1/1	1/1	./.	1/1	0/0	0/0	1/1	1/1	1/1	1/1	1/1	1/1	1/1	1/1	1/1	0/0	1/1	0/0	1/1	0/0	0/0	1/1
8	3994719	DEL-8-3994719	CAT	C	AC=92;AF=0.597;AN=154;BaseQRankSum=0.253;CSQ=-|3_prime_UTR_variant|MODIFIER||Zm00001d008284|Transcript|Zm00001d008284_T001|protein_coding|5/6||||901-902|||||||-1|||,-|3_prime_UTR_variant|MODIFIER||Zm00001d008284|Transcript|Zm00001d008284_T002|protein_coding|5/6||||916-917|||||||-1|||,-|3_prime_UTR_variant|MODIFIER||Zm00001d008284|Transcript|Zm00001d008284_T003|protein_coding|4/5||||2951-2952|||||…	0/0	0/0	0/0	1/1	1/1	1/1	1/1	0/1	0/0	0/1	1/1	1/1	0/0	./.	1/1	1/1	0/0	0/0	1/1	1/1	0/0	0/0	1/1	1/1	1/1	1/1	0/0	0/0	1/1	1/1	1/1	1/1	1/1	1/1	1/1	1/1	1/1	0/0	1/1	0/0	1/1	0/0	1/1	1/1
8	3994752	SNP-8-3994752	T	C	AC=99;AF=0.619;AN=160;BaseQRankSum=1.65;CSQ=C|3_prime_UTR_variant|MODIFIER||Zm00001d008284|Transcript|Zm00001d008284_T001|protein_coding|5/6||||870|||||||-1|||,C|3_prime_UTR_variant|MODIFIER||Zm00001d008284|Transcript|Zm00001d008284_T002|protein_coding|5/6||||885|||||||-1|||,C|3_prime_UTR_variant|MODIFIER||Zm00001d008284|Transcript|Zm00001d008284_T003|protein_coding|4/5||||2920|||||||-1|||,C|3_pr…	0/0	0/0	0/0	1/1	1/1	1/1	1/1	0/1	0/0	1/1	1/1	1/1	0/0	1/1	1/1	1/1	0/0	0/0	1/1	1/1	0/0	0/0	1/1	1/1	1/1	1/1	0/0	0/0	1/1	1/1	1/1	1/1	1/1	1/1	1/1	1/1	1/1	0/0	1/1	0/0	1/1	0/0	1/1	1/1
8	3994800	INS-8-3994800	C	CGGAATG	AC=16;AF=0.101;AN=158;CSQ=GGAATG|3_prime_UTR_variant|MODIFIER||Zm00001d008284|Transcript|Zm00001d008284_T001|protein_coding|5/6||||821-822|||||||-1|||,GGAATG|3_prime_UTR_variant|MODIFIER||Zm00001d008284|Transcript|Zm00001d008284_T002|protein_coding|5/6||||836-837|||||||-1|||,GGAATG|3_prime_UTR_variant|MODIFIER||Zm00001d008284|Transcript|Zm00001d008284_T003|protein_coding|4/5||||2871-2872|||||||-1…	0/0	0/0	0/0	0/0	0/0	./.	0/0	0/0	0/0	0/0	0/0	0/0	0/0	0/0	0/0	0/0	0/0	0/0	0/0	0/0	0/0	0/0	0/0	0/0	0/0	0/0	0/0	0/0	1/1	0/0	1/1	1/1	1/1	0/0	1/1	0/0	0/0	0/0	0/0	0/0	0/0	0/0	0/0	0/0
8	3994831	SNP-8-3994831	T	C	AC=90;AF=0.577;AN=156;BaseQRankSum=2.1;CSQ=C|3_prime_UTR_variant|MODIFIER||Zm00001d008284|Transcript|Zm00001d008284_T001|protein_coding|5/6||||791|||||||-1|||,C|3_prime_UTR_variant|MODIFIER||Zm00001d008284|Transcript|Zm00001d008284_T002|protein_coding|5/6||||806|||||||-1|||,C|3_prime_UTR_variant|MODIFIER||Zm00001d008284|Transcript|Zm00001d008284_T003|protein_coding|4/5||||2841|||||||-1|||,C|3_pri…	0/0	0/0	0/0	1/1	1/1	1/1	1/1	0/1	0/0	1/1	0/1	1/1	0/0	1/1	0/0	0/0	./.	0/0	1/1	1/1	0/0	0/0	1/1	1/1	1/1	1/1	0/0	0/0	1/1	1/1	1/1	./.	1/1	1/1	1/1	1/1	1/1	0/0	1/1	0/0	1/1	0/0	0/0	1/1
8	3994847	SNP-8-3994847	A	G	AC=86;AF=0.558;AN=154;BaseQRankSum=-0.319;CSQ=G|3_prime_UTR_variant|MODIFIER||Zm00001d008284|Transcript|Zm00001d008284_T001|protein_coding|5/6||||775|||||||-1|||,G|3_prime_UTR_variant|MODIFIER||Zm00001d008284|Transcript|Zm00001d008284_T002|protein_coding|5/6||||790|||||||-1|||,G|3_prime_UTR_variant|MODIFIER||Zm00001d008284|Transcript|Zm00001d008284_T003|protein_coding|4/5||||2825|||||||-1|||,G|3_…	0/0	0/0	0/0	1/1	1/1	1/1	1/1	0/0	0/0	0/1	0/1	1/1	0/0	1/1	0/0	0/0	./.	0/0	1/1	1/1	0/0	0/0	1/1	1/1	1/1	1/1	0/0	0/0	1/1	1/1	1/1	./.	1/1	1/1	1/1	1/1	1/1	0/0	1/1	0/0	1/1	0/0	0/0	./.
8	3994886	DEL-8-3994886	CA	C	AC=84;AF=0.553;AN=152;BaseQRankSum=-0.319;CSQ=-|3_prime_UTR_variant|MODIFIER||Zm00001d008284|Transcript|Zm00001d008284_T001|protein_coding|5/6||||735|||||||-1|||,-|3_prime_UTR_variant|MODIFIER||Zm00001d008284|Transcript|Zm00001d008284_T002|protein_coding|5/6||||750|||||||-1|||,-|3_prime_UTR_variant|MODIFIER||Zm00001d008284|Transcript|Zm00001d008284_T003|protein_coding|4/5||||2785|||||||-1|||,-|3_…	0/0	0/0	0/0	1/1	1/1	1/1	1/1	0/0	0/0	0/1	0/1	1/1	0/0	1/1	0/0	0/0	0/0	0/0	1/1	1/1	0/0	0/0	1/1	1/1	1/1	1/1	0/0	0/0	1/1	1/1	1/1	./.	1/1	1/1	1/1	./.	1/1	0/0	1/1	0/0	1/1	0/0	0/0	./.
8	3994919	DEL-8-3994919	TGTCATGCTTCGATAGAGTG	T	AC=71;AF=0.455;AN=156;BaseQRankSum=-0.473;CSQ=-|3_prime_UTR_variant|MODIFIER||Zm00001d008284|Transcript|Zm00001d008284_T001|protein_coding|5/6||||684-702|||||||-1|||,-|3_prime_UTR_variant|MODIFIER||Zm00001d008284|Transcript|Zm00001d008284_T002|protein_coding|5/6||||699-717|||||||-1|||,-|3_prime_UTR_variant|MODIFIER||Zm00001d008284|Transcript|Zm00001d008284_T003|protein_coding|4/5||||2734-2752||||…	0/0	0/0	0/0	1/1	1/1	1/1	1/1	0/1	0/0	0/1	0/1	1/1	0/0	1/1	0/0	0/0	0/0	0/0	1/1	1/1	0/0	0/0	1/1	1/1	1/1	1/1	0/0	0/0	0/0	1/1	0/0	0/0	0/0	1/1	0/0	./.	1/1	0/0	1/1	0/0	1/1	0/0	0/0	./.
8	3995186	SNP-8-3995186	G	C	AC=14;AF=0.089;AN=158;CSQ=C|intron_variant|MODIFIER||Zm00001d008284|Transcript|Zm00001d008284_T001|protein_coding||4/5||||||||||-1|||,C|intron_variant|MODIFIER||Zm00001d008284|Transcript|Zm00001d008284_T002|protein_coding||4/5||||||||||-1|||,C|intron_variant|MODIFIER||Zm00001d008284|Transcript|Zm00001d008284_T003|protein_coding||3/4||||||||||-1|||,C|intron_variant|MODIFIER||Zm00001d008284|Transcr…	0/0	0/0	0/0	0/0	0/0	0/0	0/0	0/0	0/0	0/0	0/0	0/0	0/0	0/0	0/0	./.	0/0	0/0	0/0	0/0	0/0	0/0	0/0	0/0	0/0	0/0	0/0	0/0	1/1	0/0	1/1	1/1	1/1	0/0	1/1	0/0	0/0	0/0	0/0	0/0	0/0	0/0	0/0	0/0
8	3995228	SNP-8-3995228	A	G	AC=72;AF=0.456;AN=158;BaseQRankSum=2.45;CSQ=G|intron_variant|MODIFIER||Zm00001d008284|Transcript|Zm00001d008284_T001|protein_coding||4/5||||||||||-1|||,G|intron_variant|MODIFIER||Zm00001d008284|Transcript|Zm00001d008284_T002|protein_coding||4/5||||||||||-1|||,G|intron_variant|MODIFIER||Zm00001d008284|Transcript|Zm00001d008284_T003|protein_coding||3/4||||||||||-1|||,G|intron_variant|MODIFIER||Zm00…	0/0	0/0	0/0	1/1	1/1	1/1	./.	0/0	0/0	0/1	0/1	1/1	0/0	1/1	0/0	0/0	0/0	0/0	1/1	1/1	0/0	0/0	1/1	1/1	1/1	1/1	0/0	0/0	0/0	1/1	0/0	0/0	0/0	1/1	0/0	1/1	1/1	0/0	1/1	0/0	1/1	0/0	0/0	1/1
8	3995280	SNP-8-3995280	A	G	AC=65;AF=0.433;AN=150;BaseQRankSum=1.65;CSQ=G|synonymous_variant|LOW||Zm00001d008284|Transcript|Zm00001d008284_T001|protein_coding|4/6||||426|426|142|H|caT/caC|||-1|||,G|synonymous_variant|LOW||Zm00001d008284|Transcript|Zm00001d008284_T002|protein_coding|4/6||||441|441|147|H|caT/caC|||-1|||,G|3_prime_UTR_variant|MODIFIER||Zm00001d008284|Transcript|Zm00001d008284_T003|protein_coding|3/5||||2476|||…	0/0	0/0	0/0	1/1	1/1	1/1	./.	0/0	0/0	./.	0/1	1/1	0/0	1/1	0/0	0/0	0/0	0/0	1/1	1/1	0/0	0/0	1/1	1/1	./.	1/1	0/0	0/0	0/0	1/1	0/0	0/0	0/0	1/1	0/0	1/1	1/1	0/0	1/1	0/0	1/1	0/0	0/0	1/1
8	3995292	SNP-8-3995292	C	T	AC=14;AF=0.092;AN=152;CSQ=T|synonymous_variant|LOW||Zm00001d008284|Transcript|Zm00001d008284_T001|protein_coding|4/6||||414|414|138|R|agG/agA|||-1|||,T|synonymous_variant|LOW||Zm00001d008284|Transcript|Zm00001d008284_T002|protein_coding|4/6||||429|429|143|R|agG/agA|||-1|||,T|3_prime_UTR_variant|MODIFIER||Zm00001d008284|Transcript|Zm00001d008284_T003|protein_coding|3/5||||2464|||||||-1|||,T|synony…	0/0	0/0	0/0	0/0	0/0	0/0	./.	0/0	0/0	0/0	0/0	0/0	0/0	0/0	0/0	0/0	0/0	0/0	0/0	0/0	0/0	0/0	0/0	0/0	./.	0/0	0/0	0/0	1/1	0/0	1/1	1/1	1/1	0/0	1/1	./.	0/0	0/0	0/0	0/0	0/0	0/0	0/0	0/0
8	3995307	SNP-8-3995307	C	T	AC=55;AF=0.393;AN=140;BaseQRankSum=-1.645;CSQ=T|synonymous_variant|LOW||Zm00001d008284|Transcript|Zm00001d008284_T001|protein_coding|4/6||||399|399|133|G|ggG/ggA|||-1|||,T|synonymous_variant|LOW||Zm00001d008284|Transcript|Zm00001d008284_T002|protein_coding|4/6||||414|414|138|G|ggG/ggA|||-1|||,T|3_prime_UTR_variant|MODIFIER||Zm00001d008284|Transcript|Zm00001d008284_T003|protein_coding|3/5||||2449|…	0/0	0/0	0/0	1/1	1/1	1/1	./.	0/0	0/0	./.	0/1	1/1	0/0	1/1	0/0	0/0	0/0	0/0	./.	1/1	0/0	0/0	1/1	1/1	./.	1/1	0/0	0/0	0/0	1/1	0/0	0/0	0/0	1/1	0/0	./.	1/1	0/0	1/1	0/0	1/1	0/0	0/0	1/1
8	3995451	DEL-8-3995451	TC	T	AC=67;AF=0.447;AN=150;BaseQRankSum=1.47;CSQ=-|intron_variant|MODIFIER||Zm00001d008284|Transcript|Zm00001d008284_T001|protein_coding||3/5||||||||||-1|||,-|intron_variant|MODIFIER||Zm00001d008284|Transcript|Zm00001d008284_T002|protein_coding||3/5||||||||||-1|||,-|intron_variant|MODIFIER||Zm00001d008284|Transcript|Zm00001d008284_T003|protein_coding||2/4||||||||||-1|||,-|intron_variant|MODIFIER||Zm00…	0/0	0/0	0/0	1/1	1/1	1/1	./.	0/0	0/0	./.	0/1	1/1	0/0	./.	0/0	./.	0/0	0/0	1/1	1/1	0/0	0/0	1/1	1/1	1/1	1/1	0/0	0/0	0/0	1/1	0/0	0/0	0/0	1/1	0/0	1/1	1/1	0/0	1/1	0/0	1/1	0/0	0/0	1/1
8	3995496	SNP-8-3995496	A	G	AC=14;AF=0.089;AN=158;CSQ=G|intron_variant|MODIFIER||Zm00001d008284|Transcript|Zm00001d008284_T001|protein_coding||3/5||||||||||-1|||,G|intron_variant|MODIFIER||Zm00001d008284|Transcript|Zm00001d008284_T002|protein_coding||3/5||||||||||-1|||,G|intron_variant|MODIFIER||Zm00001d008284|Transcript|Zm00001d008284_T003|protein_coding||2/4||||||||||-1|||,G|intron_variant|MODIFIER||Zm00001d008284|Transcr…	0/0	0/0	0/0	0/0	0/0	0/0	0/0	0/0	0/0	0/0	0/0	0/0	0/0	0/0	0/0	./.	0/0	0/0	0/0	0/0	0/0	0/0	0/0	0/0	0/0	0/0	0/0	0/0	1/1	0/0	1/1	1/1	1/1	0/0	1/1	0/0	0/0	0/0	0/0	0/0	0/0	0/0	0/0	0/0
8	3995562	SNP-8-3995562	G	A	AC=70;AF=0.449;AN=156;BaseQRankSum=-0.967;CSQ=A|synonymous_variant|LOW||Zm00001d008284|Transcript|Zm00001d008284_T001|protein_coding|3/6||||228|228|76|G|ggC/ggT|||-1|||,A|synonymous_variant|LOW||Zm00001d008284|Transcript|Zm00001d008284_T002|protein_coding|3/6||||243|243|81|G|ggC/ggT|||-1|||,A|3_prime_UTR_variant|MODIFIER||Zm00001d008284|Transcript|Zm00001d008284_T003|protein_coding|2/5||||2278|||…	0/0	0/0	0/0	0/0	1/1	1/1	1/1	0/0	0/0	0/1	0/1	1/1	0/0	1/1	0/0	0/0	0/0	0/0	1/1	1/1	0/0	0/0	1/1	1/1	1/1	1/1	0/0	0/0	0/0	1/1	0/0	0/0	0/0	1/1	0/0	1/1	1/1	0/0	1/1	0/0	1/1	0/0	0/0	1/1
8	3995595	SNP-8-3995595	G	A	AC=14;AF=0.09;AN=156;CSQ=A|synonymous_variant|LOW||Zm00001d008284|Transcript|Zm00001d008284_T001|protein_coding|3/6||||195|195|65|F|ttC/ttT|||-1|||,A|synonymous_variant|LOW||Zm00001d008284|Transcript|Zm00001d008284_T002|protein_coding|3/6||||210|210|70|F|ttC/ttT|||-1|||,A|3_prime_UTR_variant|MODIFIER||Zm00001d008284|Transcript|Zm00001d008284_T003|protein_coding|2/5||||2245|||||||-1|||,A|synonymou…	0/0	0/0	0/0	0/0	0/0	0/0	0/0	0/0	0/0	0/0	0/0	0/0	0/0	0/0	0/0	0/0	0/0	0/0	0/0	0/0	0/0	0/0	0/0	0/0	0/0	0/0	0/0	0/0	1/1	0/0	1/1	1/1	1/1	0/0	1/1	0/0	0/0	0/0	0/0	0/0	0/0	0/0	0/0	0/0
8	3995727	SNP-8-3995727	A	T	AC=14;AF=0.09;AN=156;CSQ=T|intron_variant|MODIFIER||Zm00001d008284|Transcript|Zm00001d008284_T001|protein_coding||2/5||||||||||-1|||,T|intron_variant|MODIFIER||Zm00001d008284|Transcript|Zm00001d008284_T002|protein_coding||2/5||||||||||-1|||,T|3_prime_UTR_variant|MODIFIER||Zm00001d008284|Transcript|Zm00001d008284_T003|protein_coding|2/5||||2113|||||||-1|||,T|intron_variant|MODIFIER||Zm00001d008284…	0/0	0/0	0/0	0/0	0/0	0/0	0/0	0/0	0/0	0/0	0/0	0/0	0/0	0/0	0/0	./.	0/0	0/0	0/0	0/0	0/0	./.	0/0	0/0	0/0	0/0	0/0	0/0	1/1	0/0	1/1	1/1	1/1	0/0	1/1	0/0	0/0	0/0	0/0	0/0	0/0	0/0	0/0	0/0
8	3995732	SNP-8-3995732	C	A	AC=72;AF=0.462;AN=156;BaseQRankSum=-0.887;CSQ=A|intron_variant|MODIFIER||Zm00001d008284|Transcript|Zm00001d008284_T001|protein_coding||2/5||||||||||-1|||,A|intron_variant|MODIFIER||Zm00001d008284|Transcript|Zm00001d008284_T002|protein_coding||2/5||||||||||-1|||,A|3_prime_UTR_variant|MODIFIER||Zm00001d008284|Transcript|Zm00001d008284_T003|protein_coding|2/5||||2108|||||||-1|||,A|intron_variant|MOD…	0/0	0/0	0/0	0/0	1/1	1/1	1/1	0/0	0/0	0/1	0/1	1/1	0/0	1/1	0/0	./.	0/0	0/0	1/1	1/1	0/0	./.	1/1	1/1	1/1	1/1	0/0	0/0	0/0	1/1	0/0	0/0	0/0	1/1	0/0	1/1	1/1	0/0	1/1	0/0	1/1	0/0	0/0	1/1
8	3995738	SNP-8-3995738	C	T	AC=112;AF=0.718;AN=156;BaseQRankSum=0.967;CSQ=T|intron_variant|MODIFIER||Zm00001d008284|Transcript|Zm00001d008284_T001|protein_coding||2/5||||||||||-1|||,T|intron_variant|MODIFIER||Zm00001d008284|Transcript|Zm00001d008284_T002|protein_coding||2/5||||||||||-1|||,T|3_prime_UTR_variant|MODIFIER||Zm00001d008284|Transcript|Zm00001d008284_T003|protein_coding|2/5||||2102|||||||-1|||,T|intron_variant|MOD…	1/1	1/1	1/1	1/1	1/1	1/1	1/1	0/0	1/1	0/1	0/1	1/1	1/1	1/1	1/1	./.	0/0	0/0	1/1	1/1	0/0	./.	1/1	1/1	1/1	1/1	0/0	0/0	1/1	1/1	1/1	1/1	1/1	1/1	1/1	1/1	1/1	0/0	1/1	0/0	1/1	0/0	1/1	1/1
8	3995757	SNP-8-3995757	A	G	AC=112;AF=0.718;AN=156;BaseQRankSum=0.674;CSQ=G|intron_variant|MODIFIER||Zm00001d008284|Transcript|Zm00001d008284_T001|protein_coding||2/5||||||||||-1|||,G|intron_variant|MODIFIER||Zm00001d008284|Transcript|Zm00001d008284_T002|protein_coding||2/5||||||||||-1|||,G|3_prime_UTR_variant|MODIFIER||Zm00001d008284|Transcript|Zm00001d008284_T003|protein_coding|2/5||||2083|||||||-1|||,G|intron_variant|MOD…	1/1	1/1	1/1	1/1	1/1	1/1	1/1	0/0	1/1	0/1	0/1	1/1	1/1	1/1	1/1	./.	0/0	0/0	1/1	1/1	0/0	./.	1/1	1/1	1/1	1/1	0/0	0/0	1/1	1/1	1/1	1/1	1/1	1/1	1/1	1/1	1/1	0/0	1/1	0/0	1/1	0/0	1/1	1/1
8	3995771	SNP-8-3995771	T	C	AC=96;AF=0.623;AN=154;BaseQRankSum=1.92;CSQ=C|intron_variant|MODIFIER||Zm00001d008284|Transcript|Zm00001d008284_T001|protein_coding||2/5||||||||||-1|||,C|intron_variant|MODIFIER||Zm00001d008284|Transcript|Zm00001d008284_T002|protein_coding||2/5||||||||||-1|||,C|3_prime_UTR_variant|MODIFIER||Zm00001d008284|Transcript|Zm00001d008284_T003|protein_coding|2/5||||2069|||||||-1|||,C|intron_variant|MODIF…	1/1	1/1	1/1	1/1	1/1	1/1	1/1	0/0	1/1	0/1	0/1	1/1	1/1	1/1	1/1	./.	0/0	0/0	1/1	1/1	0/0	./.	1/1	./.	1/1	1/1	0/0	0/0	0/0	1/1	0/0	0/0	0/0	1/1	0/0	1/1	1/1	0/0	1/1	0/0	1/1	0/0	1/1	1/1
8	3995787	SNP-8-3995787	G	A	AC=14;AF=0.091;AN=154;CSQ=A|intron_variant|MODIFIER||Zm00001d008284|Transcript|Zm00001d008284_T001|protein_coding||2/5||||||||||-1|||,A|intron_variant|MODIFIER||Zm00001d008284|Transcript|Zm00001d008284_T002|protein_coding||2/5||||||||||-1|||,A|3_prime_UTR_variant|MODIFIER||Zm00001d008284|Transcript|Zm00001d008284_T003|protein_coding|2/5||||2053|||||||-1|||,A|intron_variant|MODIFIER||Zm00001d00828…	0/0	0/0	0/0	0/0	0/0	0/0	0/0	0/0	0/0	0/0	0/0	0/0	0/0	0/0	0/0	./.	0/0	0/0	0/0	0/0	0/0	0/0	0/0	./.	0/0	0/0	0/0	0/0	1/1	0/0	1/1	1/1	1/1	0/0	1/1	0/0	0/0	0/0	0/0	0/0	0/0	0/0	0/0	0/0
8	3995896	SNP-8-3995896	G	A	AC=99;AF=0.643;AN=154;BaseQRankSum=-2.515;CSQ=A|missense_variant|MODERATE||Zm00001d008284|Transcript|Zm00001d008284_T001|protein_coding|2/6||||26|26|9|S/F|tCc/tTc|||-1|||,A|intron_variant|MODIFIER||Zm00001d008284|Transcript|Zm00001d008284_T002|protein_coding||2/5||||||||||-1|||,A|3_prime_UTR_variant|MODIFIER||Zm00001d008284|Transcript|Zm00001d008284_T003|protein_coding|2/5||||1944|||||||-1|||,A|i…	./.	1/1	1/1	1/1	1/1	1/1	1/1	0/1	1/1	0/1	0/1	1/1	1/1	1/1	1/1	1/1	0/0	0/0	1/1	1/1	0/0	1/1	./.	1/1	1/1	1/1	0/0	0/0	0/0	1/1	./.	0/0	0/0	1/1	0/0	1/1	1/1	0/0	1/1	0/0	1/1	0/0	1/1	1/1
8	3995900	SNP-8-3995900	C	T	AC=12;AF=0.077;AN=156;CSQ=T|missense_variant|MODERATE||Zm00001d008284|Transcript|Zm00001d008284_T001|protein_coding|2/6||||22|22|8|V/I|Gtc/Atc|||-1|||,T|intron_variant|MODIFIER||Zm00001d008284|Transcript|Zm00001d008284_T002|protein_coding||2/5||||||||||-1|||,T|3_prime_UTR_variant|MODIFIER||Zm00001d008284|Transcript|Zm00001d008284_T003|protein_coding|2/5||||1940|||||||-1|||,T|intron_variant|MODIFI…	0/0	0/0	0/0	0/0	0/0	0/0	0/0	0/0	0/0	0/0	0/0	0/0	0/0	0/0	0/0	0/0	0/0	0/0	0/0	0/0	0/0	0/0	./.	0/0	0/0	0/0	0/0	0/0	1/1	0/0	./.	1/1	1/1	0/0	1/1	0/0	0/0	0/0	0/0	0/0	0/0	0/0	0/0	0/0
8	3995907	SNP-8-3995907	C	A	AC=99;AF=0.643;AN=154;BaseQRankSum=-0.341;CSQ=A|missense_variant&splice_region_variant|MODERATE||Zm00001d008284|Transcript|Zm00001d008284_T001|protein_coding|2/6||||15|15|5|W/C|tgG/tgT|||-1|||,A|intron_variant|MODIFIER||Zm00001d008284|Transcript|Zm00001d008284_T002|protein_coding||2/5||||||||||-1|||,A|3_prime_UTR_variant|MODIFIER||Zm00001d008284|Transcript|Zm00001d008284_T003|protein_coding|2/5||…	./.	1/1	1/1	1/1	1/1	1/1	1/1	0/1	1/1	0/1	0/1	1/1	1/1	1/1	1/1	1/1	0/0	0/0	1/1	1/1	0/0	1/1	./.	1/1	1/1	1/1	0/0	0/0	0/0	1/1	./.	0/0	0/0	1/1	0/0	1/1	1/1	0/0	1/1	0/0	1/1	0/0	1/1	1/1
8	3995911	SNP-8-3995911	C	A	AC=12;AF=0.077;AN=156;CSQ=A|splice_region_variant&splice_polypyrimidine_tract_variant&intron_variant|LOW||Zm00001d008284|Transcript|Zm00001d008284_T001|protein_coding||1/5||||||||||-1|||,A|intron_variant|MODIFIER||Zm00001d008284|Transcript|Zm00001d008284_T002|protein_coding||2/5||||||||||-1|||,A|3_prime_UTR_variant|MODIFIER||Zm00001d008284|Transcript|Zm00001d008284_T003|protein_coding|2/5||||1929…	0/0	0/0	0/0	0/0	0/0	0/0	0/0	0/0	0/0	0/0	0/0	0/0	0/0	0/0	0/0	0/0	0/0	0/0	0/0	0/0	0/0	0/0	./.	0/0	0/0	0/0	0/0	0/0	1/1	0/0	./.	1/1	1/1	0/0	1/1	0/0	0/0	0/0	0/0	0/0	0/0	0/0	0/0	0/0
8	3996018	SNP-8-3996018	A	G	AC=112;AF=0.718;AN=156;BaseQRankSum=0.674;CSQ=G|intron_variant|MODIFIER||Zm00001d008284|Transcript|Zm00001d008284_T001|protein_coding||1/5||||||||||-1|||,G|intron_variant|MODIFIER||Zm00001d008284|Transcript|Zm00001d008284_T002|protein_coding||2/5||||||||||-1|||,G|3_prime_UTR_variant|MODIFIER||Zm00001d008284|Transcript|Zm00001d008284_T003|protein_coding|2/5||||1822|||||||-1|||,G|intron_variant|MOD…	1/1	1/1	1/1	1/1	1/1	1/1	1/1	0/0	1/1	0/1	0/1	1/1	1/1	1/1	1/1	1/1	0/0	0/0	1/1	1/1	0/0	1/1	1/1	1/1	1/1	1/1	0/0	0/0	1/1	1/1	1/1	1/1	1/1	1/1	./.	1/1	1/1	0/0	1/1	0/0	1/1	0/0	1/1	1/1
8	3996033	INS-8-3996033	T	TA	AC=12;AF=0.077;AN=156;CSQ=A|intron_variant|MODIFIER||Zm00001d008284|Transcript|Zm00001d008284_T001|protein_coding||1/5||||||||||-1|||,A|intron_variant|MODIFIER||Zm00001d008284|Transcript|Zm00001d008284_T002|protein_coding||2/5||||||||||-1|||,A|3_prime_UTR_variant|MODIFIER||Zm00001d008284|Transcript|Zm00001d008284_T003|protein_coding|2/5||||1806-1807|||||||-1|||,A|intron_variant|MODIFIER||Zm00001d…	0/0	0/0	0/0	0/0	0/0	0/0	0/0	0/0	0/0	0/0	0/0	0/0	0/0	0/0	0/0	0/0	0/0	0/0	0/0	0/0	0/0	0/0	0/0	0/0	0/0	0/0	0/0	0/0	1/1	0/0	1/1	1/1	1/1	0/0	./.	0/0	0/0	0/0	0/0	0/0	0/0	0/0	0/0	0/0
8	3996066	INS-8-3996066	C	CAT	AC=95;AF=0.625;AN=152;BaseQRankSum=0.489;CSQ=AT|intron_variant|MODIFIER||Zm00001d008284|Transcript|Zm00001d008284_T001|protein_coding||1/5||||||||||-1|||,AT|intron_variant|MODIFIER||Zm00001d008284|Transcript|Zm00001d008284_T002|protein_coding||2/5||||||||||-1|||,AT|3_prime_UTR_variant|MODIFIER||Zm00001d008284|Transcript|Zm00001d008284_T003|protein_coding|2/5||||1773-1774|||||||-1|||,AT|intron_var…	1/1	1/1	1/1	./.	1/1	1/1	1/1	0/0	1/1	0/1	0/1	1/1	1/1	1/1	1/1	1/1	0/0	0/0	1/1	1/1	0/0	1/1	1/1	1/1	1/1	1/1	0/0	0/0	0/0	1/1	0/0	0/0	0/0	1/1	./.	1/1	./.	0/0	1/1	0/0	1/1	0/0	1/1	1/1
8	3996086	SNP-8-3996086	C	T	AC=12;AF=0.076;AN=158;CSQ=T|intron_variant|MODIFIER||Zm00001d008284|Transcript|Zm00001d008284_T001|protein_coding||1/5||||||||||-1|||,T|intron_variant|MODIFIER||Zm00001d008284|Transcript|Zm00001d008284_T002|protein_coding||2/5||||||||||-1|||,T|3_prime_UTR_variant|MODIFIER||Zm00001d008284|Transcript|Zm00001d008284_T003|protein_coding|2/5||||1754|||||||-1|||,T|intron_variant|MODIFIER||Zm00001d00828…	0/0	0/0	0/0	0/0	0/0	0/0	0/0	0/0	0/0	0/0	0/0	0/0	0/0	0/0	0/0	0/0	0/0	0/0	0/0	0/0	0/0	0/0	0/0	0/0	0/0	0/0	0/0	0/0	1/1	0/0	1/1	1/1	1/1	0/0	./.	0/0	0/0	0/0	0/0	0/0	0/0	0/0	0/0	0/0
8	3996100	SNP-8-3996100	T	A	AC=72;AF=0.456;AN=158;BaseQRankSum=0.18;CSQ=A|intron_variant|MODIFIER||Zm00001d008284|Transcript|Zm00001d008284_T001|protein_coding||1/5||||||||||-1|||,A|intron_variant|MODIFIER||Zm00001d008284|Transcript|Zm00001d008284_T002|protein_coding||2/5||||||||||-1|||,A|3_prime_UTR_variant|MODIFIER||Zm00001d008284|Transcript|Zm00001d008284_T003|protein_coding|2/5||||1740|||||||-1|||,A|intron_variant|MODIF…	0/0	0/0	0/0	0/0	1/1	1/1	1/1	0/0	0/0	0/1	0/1	1/1	0/0	1/1	0/0	0/0	0/0	0/0	1/1	1/1	0/0	0/0	1/1	1/1	1/1	1/1	0/0	0/0	0/0	1/1	0/0	./.	0/0	1/1	0/0	1/1	1/1	0/0	1/1	0/0	1/1	0/0	0/0	1/1
8	3996132	SNP-8-3996132	A	G	AC=102;AF=0.646;AN=158;BaseQRankSum=1.72;CSQ=G|intron_variant|MODIFIER||Zm00001d008284|Transcript|Zm00001d008284_T001|protein_coding||1/5||||||||||-1|||,G|intron_variant|MODIFIER||Zm00001d008284|Transcript|Zm00001d008284_T002|protein_coding||2/5||||||||||-1|||,G|3_prime_UTR_variant|MODIFIER||Zm00001d008284|Transcript|Zm00001d008284_T003|protein_coding|2/5||||1708|||||||-1|||,G|intron_variant|MODI…	1/1	1/1	1/1	1/1	1/1	1/1	1/1	0/0	1/1	0/1	0/1	1/1	1/1	1/1	1/1	1/1	0/0	0/0	1/1	1/1	0/0	1/1	1/1	1/1	1/1	1/1	0/0	0/0	0/0	1/1	0/0	./.	0/0	1/1	0/0	1/1	1/1	0/0	1/1	0/0	1/1	0/0	1/1	1/1
8	3996141	SNP-8-3996141	G	T	AC=14;AF=0.088;AN=160;CSQ=T|intron_variant|MODIFIER||Zm00001d008284|Transcript|Zm00001d008284_T001|protein_coding||1/5||||||||||-1|||,T|splice_donor_region_variant&intron_variant|LOW||Zm00001d008284|Transcript|Zm00001d008284_T002|protein_coding||2/5||||||||||-1|||,T|3_prime_UTR_variant|MODIFIER||Zm00001d008284|Transcript|Zm00001d008284_T003|protein_coding|2/5||||1699|||||||-1|||,T|splice_donor_re…	0/0	0/0	0/0	0/0	0/0	0/0	0/0	0/0	0/0	0/0	0/0	0/0	0/0	0/0	0/0	0/0	0/0	0/0	0/0	0/0	0/0	0/0	0/0	0/0	0/0	0/0	0/0	0/0	1/1	0/0	1/1	1/1	1/1	0/0	1/1	0/0	0/0	0/0	0/0	0/0	0/0	0/0	0/0	0/0
8	3996165	SNP-8-3996165	G	A	AC=12;AF=0.076;AN=158;CSQ=A|intron_variant|MODIFIER||Zm00001d008284|Transcript|Zm00001d008284_T001|protein_coding||1/5||||||||||-1|||,A|synonymous_variant|LOW||Zm00001d008284|Transcript|Zm00001d008284_T002|protein_coding|2/6||||102|102|34|G|ggC/ggT|||-1|||,A|3_prime_UTR_variant|MODIFIER||Zm00001d008284|Transcript|Zm00001d008284_T003|protein_coding|2/5||||1675|||||||-1|||,A|synonymous_variant|LOW|…	0/0	0/0	0/0	0/0	0/0	0/0	0/0	0/0	0/0	0/0	0/0	0/0	0/0	0/0	0/0	0/0	0/0	0/0	0/0	0/0	0/0	0/0	0/0	0/0	0/0	0/0	0/0	0/0	1/1	0/0	1/1	./.	1/1	0/0	1/1	0/0	0/0	0/0	0/0	0/0	0/0	0/0	0/0	0/0
8	3996265	SNP-8-3996265	T	C	AC=96;AF=0.64;AN=150;BaseQRankSum=1.83;CSQ=C|upstream_gene_variant|MODIFIER||Zm00001d008284|Transcript|Zm00001d008284_T001|protein_coding|||||||||||47|-1|||,C|splice_acceptor_variant|HIGH||Zm00001d008284|Transcript|Zm00001d008284_T002|protein_coding||1/5||||||||||-1|||,C|3_prime_UTR_variant|MODIFIER||Zm00001d008284|Transcript|Zm00001d008284_T003|protein_coding|2/5||||1575|||||||-1|||,C|intron_var…	./.	1/1	1/1	1/1	1/1	1/1	1/1	0/0	1/1	0/1	0/1	1/1	1/1	1/1	1/1	1/1	0/0	0/0	1/1	1/1	0/0	1/1	1/1	1/1	1/1	1/1	0/0	0/0	0/0	./.	0/0	0/0	./.	1/1	0/0	1/1	1/1	0/0	1/1	0/0	1/1	0/0	1/1	1/1
8	3996278	SNP-8-3996278	A	T	AC=96;AF=0.632;AN=152;BaseQRankSum=-0.431;CSQ=T|upstream_gene_variant|MODIFIER||Zm00001d008284|Transcript|Zm00001d008284_T001|protein_coding|||||||||||60|-1|||,T|splice_polypyrimidine_tract_variant&intron_variant|LOW||Zm00001d008284|Transcript|Zm00001d008284_T002|protein_coding||1/5||||||||||-1|||,T|3_prime_UTR_variant|MODIFIER||Zm00001d008284|Transcript|Zm00001d008284_T003|protein_coding|2/5||||…	./.	1/1	1/1	1/1	1/1	1/1	1/1	0/0	1/1	0/1	0/1	1/1	1/1	1/1	1/1	1/1	0/0	0/0	1/1	1/1	0/0	1/1	1/1	1/1	1/1	1/1	0/0	0/0	0/0	./.	0/0	0/0	./.	1/1	0/0	1/1	1/1	0/0	1/1	0/0	1/1	0/0	1/1	1/1
8	3996341	SNP-8-3996341	T	C	AC=26;AF=0.173;AN=150;CSQ=C|upstream_gene_variant|MODIFIER||Zm00001d008284|Transcript|Zm00001d008284_T001|protein_coding|||||||||||123|-1|||,C|intron_variant|MODIFIER||Zm00001d008284|Transcript|Zm00001d008284_T002|protein_coding||1/5||||||||||-1|||,C|3_prime_UTR_variant|MODIFIER||Zm00001d008284|Transcript|Zm00001d008284_T003|protein_coding|2/5||||1499|||||||-1|||,C|intron_variant|MODIFIER||Zm0000…	./.	1/1	1/1	0/0	0/0	0/0	0/0	0/0	1/1	0/0	0/0	0/0	1/1	0/0	1/1	1/1	0/0	0/0	0/0	0/0	0/0	1/1	0/0	0/0	0/0	0/0	0/0	0/0	0/0	./.	0/0	./.	./.	0/0	0/0	0/0	0/0	0/0	0/0	0/0	0/0	0/0	1/1	0/0
8	3996349	SNP-8-3996349	A	T	AC=93;AF=0.637;AN=146;BaseQRankSum=1.38;CSQ=T|upstream_gene_variant|MODIFIER||Zm00001d008284|Transcript|Zm00001d008284_T001|protein_coding|||||||||||131|-1|||,T|intron_variant|MODIFIER||Zm00001d008284|Transcript|Zm00001d008284_T002|protein_coding||1/5||||||||||-1|||,T|3_prime_UTR_variant|MODIFIER||Zm00001d008284|Transcript|Zm00001d008284_T003|protein_coding|2/5||||1491|||||||-1|||,T|intron_varian…	./.	1/1	1/1	1/1	1/1	1/1	1/1	0/0	1/1	1/1	0/1	1/1	1/1	1/1	1/1	1/1	0/0	0/0	1/1	1/1	0/0	1/1	1/1	1/1	1/1	1/1	0/0	0/0	0/0	./.	0/0	./.	./.	1/1	0/0	1/1	1/1	0/0	1/1	0/0	1/1	0/0	1/1	1/1
8	3996547	DEL-8-3996547	TAG	T	AC=12;AF=0.09;AN=134;CSQ=-|upstream_gene_variant|MODIFIER||Zm00001d008284|Transcript|Zm00001d008284_T001|protein_coding|||||||||||330|-1|||,-|upstream_gene_variant|MODIFIER||Zm00001d008284|Transcript|Zm00001d008284_T002|protein_coding|||||||||||177|-1|||,-|3_prime_UTR_variant|MODIFIER||Zm00001d008284|Transcript|Zm00001d008284_T003|protein_coding|2/5||||1291-1292|||||||-1|||,-|intron_variant|MODIF…	./.	./.	./.	0/0	0/0	0/0	./.	0/0	./.	0/0	0/0	0/0	./.	0/0	0/0	0/0	0/0	0/0	0/0	0/0	0/0	./.	0/0	0/0	0/0	0/0	0/0	0/0	./.	0/0	1/1	1/1	1/1	0/0	1/1	0/0	0/0	0/0	0/0	./.	0/0	0/0	0/0	0/0
8	3996617	SNP-8-3996617	C	T	AC=94;AF=0.701;AN=134;BaseQRankSum=1.07;CSQ=T|upstream_gene_variant|MODIFIER||Zm00001d008284|Transcript|Zm00001d008284_T001|protein_coding|||||||||||399|-1|||,T|upstream_gene_variant|MODIFIER||Zm00001d008284|Transcript|Zm00001d008284_T002|protein_coding|||||||||||246|-1|||,T|3_prime_UTR_variant|MODIFIER||Zm00001d008284|Transcript|Zm00001d008284_T003|protein_coding|2/5||||1223|||||||-1|||,T|intron…	./.	./.	./.	1/1	1/1	0/1	./.	0/0	./.	1/1	0/1	1/1	./.	1/1	1/1	1/1	0/0	0/0	1/1	1/1	0/0	./.	1/1	1/1	1/1	1/1	0/0	0/0	1/1	1/1	1/1	1/1	1/1	1/1	1/1	./.	1/1	0/0	1/1	0/0	1/1	0/0	1/1	1/1
8	3996681	SNP-8-3996681	A	T	AC=90;AF=0.672;AN=134;BaseQRankSum=-0.431;CSQ=T|upstream_gene_variant|MODIFIER||Zm00001d008284|Transcript|Zm00001d008284_T001|protein_coding|||||||||||463|-1|||,T|upstream_gene_variant|MODIFIER||Zm00001d008284|Transcript|Zm00001d008284_T002|protein_coding|||||||||||310|-1|||,T|3_prime_UTR_variant|MODIFIER||Zm00001d008284|Transcript|Zm00001d008284_T003|protein_coding|2/5||||1159|||||||-1|||,T|intr…	./.	./.	./.	1/1	1/1	0/1	./.	0/0	./.	1/1	0/1	1/1	./.	1/1	1/1	1/1	0/0	0/0	1/1	1/1	0/0	./.	1/1	1/1	1/1	1/1	0/0	0/0	1/1	1/1	1/1	1/1	1/1	1/1	1/1	1/1	1/1	0/0	1/1	0/0	1/1	0/0	1/1	1/1
8	3996685	SNP-8-3996685	A	G	AC=14;AF=0.1;AN=140;CSQ=G|upstream_gene_variant|MODIFIER||Zm00001d008284|Transcript|Zm00001d008284_T001|protein_coding|||||||||||467|-1|||,G|upstream_gene_variant|MODIFIER||Zm00001d008284|Transcript|Zm00001d008284_T002|protein_coding|||||||||||314|-1|||,G|3_prime_UTR_variant|MODIFIER||Zm00001d008284|Transcript|Zm00001d008284_T003|protein_coding|2/5||||1155|||||||-1|||,G|intron_variant|MODIFIER||Z…	./.	./.	./.	0/0	0/0	0/0	0/0	0/0	./.	0/0	0/0	0/0	./.	0/0	0/0	0/0	0/0	0/0	0/0	0/0	0/0	./.	0/0	0/0	0/0	0/0	0/0	0/0	1/1	0/0	1/1	1/1	1/1	0/0	1/1	0/0	0/0	0/0	0/0	0/0	0/0	0/0	0/0	0/0
8	3996693	SNP-8-3996693	C	A	AC=14;AF=0.1;AN=140;CSQ=A|upstream_gene_variant|MODIFIER||Zm00001d008284|Transcript|Zm00001d008284_T001|protein_coding|||||||||||475|-1|||,A|upstream_gene_variant|MODIFIER||Zm00001d008284|Transcript|Zm00001d008284_T002|protein_coding|||||||||||322|-1|||,A|3_prime_UTR_variant|MODIFIER||Zm00001d008284|Transcript|Zm00001d008284_T003|protein_coding|2/5||||1147|||||||-1|||,A|intron_variant|MODIFIER||Z…	./.	./.	./.	0/0	0/0	0/0	0/0	0/0	./.	0/0	0/0	0/0	./.	0/0	0/0	0/0	0/0	0/0	0/0	0/0	0/0	./.	0/0	0/0	0/0	0/0	0/0	0/0	1/1	0/0	1/1	1/1	1/1	0/0	1/1	0/0	0/0	0/0	0/0	0/0	0/0	0/0	0/0	0/0
8	3996706	SNP-8-3996706	A	C	AC=76;AF=0.576;AN=132;CSQ=C|upstream_gene_variant|MODIFIER||Zm00001d008284|Transcript|Zm00001d008284_T001|protein_coding|||||||||||488|-1|||,C|upstream_gene_variant|MODIFIER||Zm00001d008284|Transcript|Zm00001d008284_T002|protein_coding|||||||||||335|-1|||,C|3_prime_UTR_variant|MODIFIER||Zm00001d008284|Transcript|Zm00001d008284_T003|protein_coding|2/5||||1134|||||||-1|||,C|intron_variant|MODIFIER|…	./.	./.	./.	1/1	1/1	1/1	./.	0/0	./.	1/1	1/1	1/1	./.	1/1	1/1	1/1	0/0	0/0	1/1	1/1	0/0	./.	1/1	1/1	1/1	1/1	0/0	0/0	0/0	./.	0/0	0/0	0/0	1/1	0/0	1/1	1/1	0/0	1/1	0/0	1/1	0/0	1/1	1/1
8	3996721	SNP-8-3996721	G	C	AC=10;AF=0.071;AN=140;CSQ=C|upstream_gene_variant|MODIFIER||Zm00001d008284|Transcript|Zm00001d008284_T001|protein_coding|||||||||||503|-1|||,C|upstream_gene_variant|MODIFIER||Zm00001d008284|Transcript|Zm00001d008284_T002|protein_coding|||||||||||350|-1|||,C|3_prime_UTR_variant|MODIFIER||Zm00001d008284|Transcript|Zm00001d008284_T003|protein_coding|2/5||||1119|||||||-1|||,C|intron_variant|MODIFIER|…	./.	./.	./.	1/1	0/0	0/0	0/0	0/0	./.	0/0	0/0	0/0	./.	0/0	1/1	1/1	0/0	0/0	0/0	0/0	0/0	./.	0/0	0/0	0/0	0/0	0/0	0/0	0/0	0/0	0/0	0/0	0/0	0/0	0/0	0/0	0/0	0/0	0/0	0/0	0/0	0/0	1/1	0/0
8	3996734	SNP-8-3996734	T	G	AC=89;AF=0.674;AN=132;BaseQRankSum=1.28;CSQ=G|upstream_gene_variant|MODIFIER||Zm00001d008284|Transcript|Zm00001d008284_T001|protein_coding|||||||||||516|-1|||,G|upstream_gene_variant|MODIFIER||Zm00001d008284|Transcript|Zm00001d008284_T002|protein_coding|||||||||||363|-1|||,G|3_prime_UTR_variant|MODIFIER||Zm00001d008284|Transcript|Zm00001d008284_T003|protein_coding|2/5||||1106|||||||-1|||,G|intron…	./.	./.	./.	1/1	1/1	1/1	1/1	0/0	./.	1/1	0/1	1/1	./.	1/1	1/1	1/1	0/0	0/0	1/1	1/1	0/0	./.	./.	1/1	1/1	1/1	0/0	0/0	1/1	./.	1/1	1/1	1/1	1/1	1/1	1/1	1/1	0/0	1/1	0/0	1/1	0/0	1/1	./.
8	3996758	SNP-8-3996758	A	T	AC=12;AF=0.088;AN=136;CSQ=T|upstream_gene_variant|MODIFIER||Zm00001d008284|Transcript|Zm00001d008284_T001|protein_coding|||||||||||540|-1|||,T|upstream_gene_variant|MODIFIER||Zm00001d008284|Transcript|Zm00001d008284_T002|protein_coding|||||||||||387|-1|||,T|3_prime_UTR_variant|MODIFIER||Zm00001d008284|Transcript|Zm00001d008284_T003|protein_coding|2/5||||1082|||||||-1|||,T|intron_variant|MODIFIER|…	./.	./.	0/0	0/0	0/0	0/0	0/0	0/0	./.	0/0	0/0	0/0	./.	0/0	0/0	0/0	0/0	0/0	0/0	0/0	0/0	./.	./.	0/0	0/0	0/0	0/0	0/0	1/1	0/0	1/1	1/1	1/1	0/0	1/1	0/0	0/0	0/0	0/0	0/0	0/0	0/0	0/0	./.
8	3996812	SNP-8-3996812	T	C	AC=10;AF=0.067;AN=150;CSQ=C|upstream_gene_variant|MODIFIER||Zm00001d008284|Transcript|Zm00001d008284_T001|protein_coding|||||||||||594|-1|||,C|upstream_gene_variant|MODIFIER||Zm00001d008284|Transcript|Zm00001d008284_T002|protein_coding|||||||||||441|-1|||,C|3_prime_UTR_variant|MODIFIER||Zm00001d008284|Transcript|Zm00001d008284_T003|protein_coding|2/5||||1028|||||||-1|||,C|intron_variant|MODIFIER|…	0/0	0/0	0/0	0/0	0/0	0/0	0/0	0/0	0/0	0/0	0/0	0/0	0/0	0/0	0/0	0/0	./.	0/0	0/0	0/0	0/0	0/0	0/0	0/0	0/0	0/0	0/0	0/0	1/1	0/0	1/1	1/1	1/1	0/0	1/1	0/0	0/0	0/0	0/0	0/0	0/0	0/0	0/0	./.
8	3996813	SNP-8-3996813	A	C	AC=10;AF=0.067;AN=150;CSQ=C|upstream_gene_variant|MODIFIER||Zm00001d008284|Transcript|Zm00001d008284_T001|protein_coding|||||||||||595|-1|||,C|upstream_gene_variant|MODIFIER||Zm00001d008284|Transcript|Zm00001d008284_T002|protein_coding|||||||||||442|-1|||,C|3_prime_UTR_variant|MODIFIER||Zm00001d008284|Transcript|Zm00001d008284_T003|protein_coding|2/5||||1027|||||||-1|||,C|intron_variant|MODIFIER|…	0/0	0/0	0/0	0/0	0/0	0/0	0/0	0/0	0/0	0/0	0/0	0/0	0/0	0/0	0/0	0/0	./.	0/0	0/0	0/0	0/0	0/0	0/0	0/0	0/0	0/0	0/0	0/0	1/1	0/0	1/1	1/1	1/1	0/0	1/1	0/0	0/0	0/0	0/0	0/0	0/0	0/0	0/0	./.
8	3996959	SNP-8-3996959	C	T	AC=92;AF=0.613;AN=150;BaseQRankSum=-1.282;CSQ=T|upstream_gene_variant|MODIFIER||Zm00001d008284|Transcript|Zm00001d008284_T001|protein_coding|||||||||||741|-1|||,T|upstream_gene_variant|MODIFIER||Zm00001d008284|Transcript|Zm00001d008284_T002|protein_coding|||||||||||588|-1|||,T|3_prime_UTR_variant|MODIFIER||Zm00001d008284|Transcript|Zm00001d008284_T003|protein_coding|2/5||||881|||||||-1|||,T|intro…	./.	1/1	1/1	1/1	1/1	1/1	1/1	0/0	1/1	1/1	0/1	1/1	1/1	1/1	1/1	1/1	0/0	0/0	1/1	1/1	0/0	1/1	./.	1/1	1/1	1/1	0/0	0/0	0/0	1/1	0/0	0/0	0/0	1/1	0/0	1/1	1/1	0/0	1/1	0/0	1/1	0/0	0/1	./.
8	3997026	SNP-8-3997026	G	T	AC=14;AF=0.09;AN=156;CSQ=T|upstream_gene_variant|MODIFIER||Zm00001d008284|Transcript|Zm00001d008284_T001|protein_coding|||||||||||808|-1|||,T|upstream_gene_variant|MODIFIER||Zm00001d008284|Transcript|Zm00001d008284_T002|protein_coding|||||||||||655|-1|||,T|3_prime_UTR_variant|MODIFIER||Zm00001d008284|Transcript|Zm00001d008284_T003|protein_coding|2/5||||814|||||||-1|||,T|intron_variant|MODIFIER||Z…	0/0	0/0	0/0	0/0	0/0	0/0	0/0	0/0	0/0	0/0	0/0	0/0	0/0	0/0	0/0	./.	0/0	0/0	0/0	0/0	0/0	0/0	0/0	0/0	0/0	0/0	0/0	0/0	1/1	0/0	1/1	1/1	1/1	0/0	1/1	0/0	0/0	0/0	0/0	0/0	0/0	0/0	0/0	0/0
8	3997052	SNP-8-3997052	C	T	AC=69;AF=0.448;AN=154;BaseQRankSum=-1.111;CSQ=T|upstream_gene_variant|MODIFIER||Zm00001d008284|Transcript|Zm00001d008284_T001|protein_coding|||||||||||834|-1|||,T|upstream_gene_variant|MODIFIER||Zm00001d008284|Transcript|Zm00001d008284_T002|protein_coding|||||||||||681|-1|||,T|3_prime_UTR_variant|MODIFIER||Zm00001d008284|Transcript|Zm00001d008284_T003|protein_coding|2/5||||788|||||||-1|||,T|intro…	0/0	0/0	0/0	0/0	1/1	1/1	1/1	0/0	0/0	0/1	./.	1/1	0/0	1/1	0/0	./.	0/0	0/0	1/1	1/1	0/0	0/0	1/1	1/1	1/1	1/1	0/0	0/0	0/0	1/1	0/0	0/0	0/0	1/1	0/0	1/1	1/1	0/0	1/1	0/0	1/1	0/0	0/0	1/1
8	3997078	SNP-8-3997078	T	G	AC=17;AF=0.11;AN=154;BaseQRankSum=1.47;CSQ=G|upstream_gene_variant|MODIFIER||Zm00001d008284|Transcript|Zm00001d008284_T001|protein_coding|||||||||||860|-1|||,G|upstream_gene_variant|MODIFIER||Zm00001d008284|Transcript|Zm00001d008284_T002|protein_coding|||||||||||707|-1|||,G|3_prime_UTR_variant|MODIFIER||Zm00001d008284|Transcript|Zm00001d008284_T003|protein_coding|2/5||||762|||||||-1|||,G|intron_v…	1/1	1/1	0/1	0/0	0/0	0/0	0/0	0/0	1/1	0/0	0/0	0/0	1/1	0/0	0/0	./.	0/0	0/0	0/0	0/0	0/0	./.	0/0	0/0	0/0	0/0	0/0	0/0	0/0	0/0	0/0	0/0	0/0	0/0	0/0	0/0	0/0	0/0	0/0	0/0	0/0	0/0	0/0	0/0
8	3997082	SNP-8-3997082	T	C	AC=12;AF=0.077;AN=156;CSQ=C|upstream_gene_variant|MODIFIER||Zm00001d008284|Transcript|Zm00001d008284_T001|protein_coding|||||||||||864|-1|||,C|upstream_gene_variant|MODIFIER||Zm00001d008284|Transcript|Zm00001d008284_T002|protein_coding|||||||||||711|-1|||,C|3_prime_UTR_variant|MODIFIER||Zm00001d008284|Transcript|Zm00001d008284_T003|protein_coding|2/5||||758|||||||-1|||,C|intron_variant|MODIFIER||…	0/0	0/0	0/0	0/0	0/0	0/0	0/0	0/0	0/0	0/0	0/0	0/0	0/0	0/0	0/0	./.	0/0	0/0	0/0	0/0	0/0	0/0	0/0	0/0	0/0	0/0	0/0	0/0	1/1	0/0	1/1	1/1	1/1	0/0	1/1	0/0	0/0	0/0	0/0	0/0	0/0	0/0	0/0	0/0
8	3997097	SNP-8-3997097	A	G	AC=18;AF=0.115;AN=156;CSQ=G|upstream_gene_variant|MODIFIER||Zm00001d008284|Transcript|Zm00001d008284_T001|protein_coding|||||||||||879|-1|||,G|upstream_gene_variant|MODIFIER||Zm00001d008284|Transcript|Zm00001d008284_T002|protein_coding|||||||||||726|-1|||,G|3_prime_UTR_variant|MODIFIER||Zm00001d008284|Transcript|Zm00001d008284_T003|protein_coding|2/5||||743|||||||-1|||,G|intron_variant|MODIFIER||…	0/0	0/0	0/0	0/0	0/0	0/0	0/0	0/0	0/0	0/0	0/0	0/0	0/0	0/0	1/1	1/1	0/0	0/0	0/0	0/0	0/0	0/0	0/0	0/0	0/0	0/0	0/0	0/0	./.	0/0	1/1	1/1	1/1	0/0	1/1	0/0	0/0	0/0	0/0	0/0	0/0	0/0	1/1	0/0
8	3997103	SNP-8-3997103	G	C	AC=18;AF=0.117;AN=154;CSQ=C|upstream_gene_variant|MODIFIER||Zm00001d008284|Transcript|Zm00001d008284_T001|protein_coding|||||||||||885|-1|||,C|upstream_gene_variant|MODIFIER||Zm00001d008284|Transcript|Zm00001d008284_T002|protein_coding|||||||||||732|-1|||,C|3_prime_UTR_variant|MODIFIER||Zm00001d008284|Transcript|Zm00001d008284_T003|protein_coding|2/5||||737|||||||-1|||,C|intron_variant|MODIFIER||…	./.	0/0	0/0	0/0	0/0	0/0	0/0	0/0	0/0	0/0	0/0	0/0	0/0	0/0	1/1	1/1	0/0	0/0	0/0	0/0	0/0	0/0	0/0	0/0	0/0	0/0	0/0	0/0	./.	0/0	1/1	1/1	1/1	0/0	1/1	0/0	0/0	0/0	0/0	0/0	0/0	0/0	1/1	0/0
8	3997110	SNP-8-3997110	G	T	AC=106;AF=0.707;AN=150;BaseQRankSum=-1.309;CSQ=T|upstream_gene_variant|MODIFIER||Zm00001d008284|Transcript|Zm00001d008284_T001|protein_coding|||||||||||892|-1|||,T|upstream_gene_variant|MODIFIER||Zm00001d008284|Transcript|Zm00001d008284_T002|protein_coding|||||||||||739|-1|||,T|3_prime_UTR_variant|MODIFIER||Zm00001d008284|Transcript|Zm00001d008284_T003|protein_coding|2/5||||730|||||||-1|||,T|intr…	1/1	1/1	1/1	1/1	1/1	./.	1/1	0/1	1/1	0/1	0/0	1/1	1/1	1/1	1/1	1/1	0/0	0/0	1/1	1/1	0/0	1/1	1/1	1/1	1/1	1/1	0/0	0/0	./.	1/1	1/1	1/1	1/1	1/1	1/1	./.	1/1	0/0	1/1	0/0	1/1	0/0	1/1	1/1
8	3997143	SNP-8-3997143	A	T	AC=107;AF=0.713;AN=150;BaseQRankSum=-1.068;CSQ=T|upstream_gene_variant|MODIFIER||Zm00001d008284|Transcript|Zm00001d008284_T001|protein_coding|||||||||||925|-1|||,T|upstream_gene_variant|MODIFIER||Zm00001d008284|Transcript|Zm00001d008284_T002|protein_coding|||||||||||772|-1|||,T|3_prime_UTR_variant|MODIFIER||Zm00001d008284|Transcript|Zm00001d008284_T003|protein_coding|2/5||||697|||||||-1|||,T|intr…	./.	1/1	1/1	1/1	1/1	1/1	1/1	0/1	1/1	0/1	0/1	1/1	1/1	1/1	1/1	1/1	0/0	0/0	1/1	1/1	0/0	1/1	1/1	1/1	1/1	1/1	0/0	0/0	./.	1/1	1/1	./.	1/1	1/1	1/1	1/1	1/1	0/0	1/1	0/0	1/1	0/0	1/1	1/1
8	3997217	SNP-8-3997217	A	T	AC=98;AF=0.653;AN=150;BaseQRankSum=-1.068;CSQ=T|upstream_gene_variant|MODIFIER||Zm00001d008284|Transcript|Zm00001d008284_T001|protein_coding|||||||||||999|-1|||,T|upstream_gene_variant|MODIFIER||Zm00001d008284|Transcript|Zm00001d008284_T002|protein_coding|||||||||||846|-1|||,T|3_prime_UTR_variant|MODIFIER||Zm00001d008284|Transcript|Zm00001d008284_T003|protein_coding|2/5||||623|||||||-1|||,T|intro…	./.	1/1	1/1	1/1	1/1	1/1	1/1	0/0	1/1	0/1	0/1	1/1	1/1	1/1	0/0	0/0	0/0	0/0	1/1	1/1	0/0	1/1	1/1	1/1	1/1	1/1	0/0	0/0	./.	1/1	1/1	./.	1/1	1/1	1/1	1/1	1/1	0/0	1/1	0/0	1/1	0/0	0/0	1/1
8	3997237	SNP-8-3997237	G	A	AC=17;AF=0.11;AN=154;BaseQRankSum=0.489;CSQ=A|upstream_gene_variant|MODIFIER||Zm00001d008284|Transcript|Zm00001d008284_T001|protein_coding|||||||||||1019|-1|||,A|upstream_gene_variant|MODIFIER||Zm00001d008284|Transcript|Zm00001d008284_T002|protein_coding|||||||||||866|-1|||,A|3_prime_UTR_variant|MODIFIER||Zm00001d008284|Transcript|Zm00001d008284_T003|protein_coding|2/5||||603|||||||-1|||,A|intron…	./.	0/0	0/0	0/0	0/0	0/0	0/0	0/0	0/0	0/0	0/0	0/0	0/0	0/0	1/1	./.	0/0	0/0	0/0	0/0	0/0	0/0	0/0	0/0	0/0	0/0	0/0	0/0	1/1	0/0	1/1	./.	1/1	0/0	1/1	0/0	0/0	0/0	0/0	0/0	0/0	0/0	0/1	0/0
8	3997288	SNP-8-3997288	G	A	AC=14;AF=0.088;AN=160;CSQ=A|upstream_gene_variant|MODIFIER||Zm00001d008284|Transcript|Zm00001d008284_T001|protein_coding|||||||||||1070|-1|||,A|upstream_gene_variant|MODIFIER||Zm00001d008284|Transcript|Zm00001d008284_T002|protein_coding|||||||||||917|-1|||,A|3_prime_UTR_variant|MODIFIER||Zm00001d008284|Transcript|Zm00001d008284_T003|protein_coding|2/5||||552|||||||-1|||,A|intron_variant|MODIFIER|…	0/0	0/0	0/0	0/0	0/0	0/0	0/0	0/0	0/0	0/0	0/0	0/0	0/0	0/0	0/0	0/0	0/0	0/0	0/0	0/0	0/0	0/0	0/0	0/0	0/0	0/0	0/0	0/0	1/1	0/0	1/1	1/1	1/1	0/0	1/1	0/0	0/0	0/0	0/0	0/0	0/0	0/0	0/0	0/0
8	3997303	SNP-8-3997303	T	G	AC=108;AF=0.701;AN=154;BaseQRankSum=1.47;CSQ=G|upstream_gene_variant|MODIFIER||Zm00001d008284|Transcript|Zm00001d008284_T001|protein_coding|||||||||||1085|-1|||,G|upstream_gene_variant|MODIFIER||Zm00001d008284|Transcript|Zm00001d008284_T002|protein_coding|||||||||||932|-1|||,G|3_prime_UTR_variant|MODIFIER||Zm00001d008284|Transcript|Zm00001d008284_T003|protein_coding|2/5||||537|||||||-1|||,G|intro…	1/1	1/1	1/1	1/1	1/1	1/1	1/1	0/0	1/1	0/1	0/1	1/1	1/1	1/1	1/1	./.	0/0	0/0	1/1	1/1	0/0	1/1	1/1	1/1	1/1	1/1	0/0	0/0	1/1	1/1	1/1	1/1	1/1	1/1	1/1	1/1	1/1	0/0	1/1	0/0	1/1	0/0	0/1	./.
8	3997309	SNP-8-3997309	A	G	AC=112;AF=0.727;AN=154;BaseQRankSum=1.15;CSQ=G|upstream_gene_variant|MODIFIER||Zm00001d008284|Transcript|Zm00001d008284_T001|protein_coding|||||||||||1091|-1|||,G|upstream_gene_variant|MODIFIER||Zm00001d008284|Transcript|Zm00001d008284_T002|protein_coding|||||||||||938|-1|||,G|3_prime_UTR_variant|MODIFIER||Zm00001d008284|Transcript|Zm00001d008284_T003|protein_coding|2/5||||531|||||||-1|||,G|intro…	1/1	1/1	1/1	1/1	1/1	1/1	1/1	0/0	1/1	0/1	0/1	1/1	1/1	1/1	1/1	./.	0/0	0/0	1/1	1/1	0/0	1/1	1/1	1/1	1/1	1/1	0/0	0/0	1/1	1/1	1/1	1/1	1/1	1/1	1/1	1/1	1/1	0/0	1/1	0/0	1/1	0/0	0/1	./.
8	3997466	SNP-8-3997466	G	A	AC=10;AF=0.063;AN=160;CSQ=A|upstream_gene_variant|MODIFIER||Zm00001d008284|Transcript|Zm00001d008284_T001|protein_coding|||||||||||1248|-1|||,A|upstream_gene_variant|MODIFIER||Zm00001d008284|Transcript|Zm00001d008284_T002|protein_coding|||||||||||1095|-1|||,A|synonymous_variant|LOW||Zm00001d008284|Transcript|Zm00001d008284_T003|protein_coding|2/5||||374|258|86|D|gaC/gaT|||-1|||,A|synonymous_varia…	0/0	0/0	0/0	0/0	0/0	0/0	1/1	0/0	0/0	0/0	0/0	0/0	1/1	0/0	1/1	1/1	0/0	0/0	0/0	0/0	0/0	0/0	0/0	0/0	0/0	0/0	0/0	0/0	0/0	0/0	0/0	0/0	0/0	0/0	0/0	0/0	0/0	0/0	0/0	0/0	0/0	0/0	0/0	0/0
8	3997544	SNP-8-3997544	G	C	AC=83;AF=0.561;AN=148;BaseQRankSum=1.07;CSQ=C|upstream_gene_variant|MODIFIER||Zm00001d008284|Transcript|Zm00001d008284_T001|protein_coding|||||||||||1326|-1|||,C|upstream_gene_variant|MODIFIER||Zm00001d008284|Transcript|Zm00001d008284_T002|protein_coding|||||||||||1173|-1|||,C|synonymous_variant|LOW||Zm00001d008284|Transcript|Zm00001d008284_T003|protein_coding|2/5||||296|180|60|V|gtC/gtG|||-1|||,…	./.	1/1	1/1	0/0	1/1	1/1	1/1	0/0	./.	0/1	1/1	1/1	0/0	1/1	./.	1/1	0/0	0/0	1/1	1/1	0/0	1/1	1/1	1/1	1/1	1/1	0/0	0/0	0/0	1/1	0/0	0/0	0/0	1/1	0/0	1/1	1/1	0/0	1/1	0/0	1/1	0/0	0/0	1/1
8	3997602	DEL-8-3997602	ACCGAAGT	A	AC=111;AF=0.73;AN=152;BaseQRankSum=0.854;CSQ=-|upstream_gene_variant|MODIFIER||Zm00001d008284|Transcript|Zm00001d008284_T001|protein_coding|||||||||||1385|-1|||,-|upstream_gene_variant|MODIFIER||Zm00001d008284|Transcript|Zm00001d008284_T002|protein_coding|||||||||||1232|-1|||,-|splice_region_variant&splice_polypyrimidine_tract_variant&intron_variant|LOW||Zm00001d008284|Transcript|Zm00001d008284_T…	./.	1/1	1/1	1/1	1/1	1/1	1/1	0/0	1/1	0/1	0/1	1/1	1/1	1/1	1/1	1/1	0/0	0/0	1/1	1/1	0/0	1/1	1/1	1/1	1/1	1/1	0/0	0/0	1/1	1/1	1/1	1/1	./.	1/1	1/1	1/1	1/1	0/0	1/1	0/0	1/1	0/0	1/1	1/1
8	3997621	SNP-8-3997621	C	G	AC=103;AF=0.687;AN=150;BaseQRankSum=1.31;CSQ=G|upstream_gene_variant|MODIFIER||Zm00001d008284|Transcript|Zm00001d008284_T001|protein_coding|||||||||||1403|-1|||,G|upstream_gene_variant|MODIFIER||Zm00001d008284|Transcript|Zm00001d008284_T002|protein_coding|||||||||||1250|-1|||,G|intron_variant|MODIFIER||Zm00001d008284|Transcript|Zm00001d008284_T003|protein_coding||1/4||||||||||-1|||,G|intron_varia…	./.	1/1	1/1	1/1	1/1	1/1	0/0	0/0	1/1	0/1	0/1	1/1	1/1	1/1	0/0	0/0	0/0	0/0	1/1	1/1	0/0	1/1	1/1	1/1	1/1	1/1	0/0	0/0	1/1	1/1	1/1	1/1	./.	1/1	1/1	1/1	1/1	0/0	1/1	0/0	1/1	0/0	1/1	1/1
8	3997627	SNP-8-3997627	T	G	AC=111;AF=0.74;AN=150;BaseQRankSum=1.18;CSQ=G|upstream_gene_variant|MODIFIER||Zm00001d008284|Transcript|Zm00001d008284_T001|protein_coding|||||||||||1409|-1|||,G|upstream_gene_variant|MODIFIER||Zm00001d008284|Transcript|Zm00001d008284_T002|protein_coding|||||||||||1256|-1|||,G|intron_variant|MODIFIER||Zm00001d008284|Transcript|Zm00001d008284_T003|protein_coding||1/4||||||||||-1|||,G|intron_varian…	./.	1/1	1/1	1/1	1/1	1/1	1/1	0/0	1/1	0/1	0/1	1/1	1/1	1/1	1/1	1/1	0/0	0/0	1/1	1/1	0/0	1/1	1/1	1/1	1/1	1/1	0/0	0/0	1/1	1/1	1/1	1/1	./.	1/1	1/1	1/1	1/1	0/0	1/1	0/0	1/1	0/0	1/1	1/1
8	3997679	INS-8-3997679	A	AC	AC=96;AF=0.615;AN=156;BaseQRankSum=1.28;CSQ=C|upstream_gene_variant|MODIFIER||Zm00001d008284|Transcript|Zm00001d008284_T001|protein_coding|||||||||||1461|-1|||,C|upstream_gene_variant|MODIFIER||Zm00001d008284|Transcript|Zm00001d008284_T002|protein_coding|||||||||||1308|-1|||,C|intron_variant|MODIFIER||Zm00001d008284|Transcript|Zm00001d008284_T003|protein_coding||1/4||||||||||-1|||,C|intron_varian…	1/1	1/1	1/1	1/1	1/1	1/1	0/0	0/0	1/1	0/1	0/1	1/1	0/0	1/1	0/0	0/0	0/0	0/0	1/1	1/1	0/0	1/1	1/1	1/1	./.	1/1	0/0	0/0	1/1	1/1	1/1	1/1	0/0	1/1	1/1	1/1	1/1	0/0	1/1	0/0	1/1	0/0	1/1	1/1
8	3997722	SNP-8-3997722	T	C	AC=106;AF=0.726;AN=146;BaseQRankSum=2.66;CSQ=C|upstream_gene_variant|MODIFIER||Zm00001d008284|Transcript|Zm00001d008284_T001|protein_coding|||||||||||1504|-1|||,C|upstream_gene_variant|MODIFIER||Zm00001d008284|Transcript|Zm00001d008284_T002|protein_coding|||||||||||1351|-1|||,C|splice_region_variant&intron_variant|LOW||Zm00001d008284|Transcript|Zm00001d008284_T003|protein_coding||1/4||||||||||-1|…	1/1	1/1	1/1	1/1	1/1	1/1	1/1	0/0	1/1	0/1	0/1	1/1	./.	1/1	1/1	1/1	0/0	0/0	1/1	1/1	0/0	1/1	1/1	1/1	./.	1/1	0/0	0/0	1/1	1/1	1/1	1/1	1/1	1/1	1/1	1/1	1/1	0/0	1/1	0/0	1/1	0/0	1/1	1/1
8	3997736	SNP-8-3997736	G	C	AC=12;AF=0.078;AN=154;CSQ=C|upstream_gene_variant|MODIFIER||Zm00001d008284|Transcript|Zm00001d008284_T001|protein_coding|||||||||||1518|-1|||,C|upstream_gene_variant|MODIFIER||Zm00001d008284|Transcript|Zm00001d008284_T002|protein_coding|||||||||||1365|-1|||,C|synonymous_variant|LOW||Zm00001d008284|Transcript|Zm00001d008284_T003|protein_coding|1/5||||236|120|40|L|ctC/ctG|||-1|||,C|synonymous_varia…	0/0	0/0	0/0	0/0	0/0	0/0	0/0	0/0	0/0	0/0	0/0	0/0	0/0	0/0	0/0	0/0	0/0	0/0	0/0	0/0	0/0	0/0	0/0	0/0	0/0	0/0	0/0	0/0	1/1	0/0	1/1	1/1	1/1	0/0	1/1	0/0	0/0	0/0	0/0	0/0	0/0	0/0	0/0	0/0
8	3997781	SNP-8-3997781	G	A	AC=86;AF=0.573;AN=150;BaseQRankSum=-1.025;CSQ=A|upstream_gene_variant|MODIFIER||Zm00001d008284|Transcript|Zm00001d008284_T001|protein_coding|||||||||||1563|-1|||,A|upstream_gene_variant|MODIFIER||Zm00001d008284|Transcript|Zm00001d008284_T002|protein_coding|||||||||||1410|-1|||,A|synonymous_variant|LOW||Zm00001d008284|Transcript|Zm00001d008284_T003|protein_coding|1/5||||191|75|25|S|tcC/tcT|||-1|||…	1/1	1/1	1/1	1/1	1/1	1/1	0/0	0/0	1/1	0/1	0/1	1/1	1/1	1/1	0/0	0/0	0/0	0/0	1/1	1/1	0/0	1/1	1/1	./.	./.	1/1	0/0	0/0	0/0	./.	0/0	0/0	0/0	1/1	0/0	1/1	1/1	0/0	1/1	0/0	1/1	0/0	1/1	1/1
8	3997884	INS-8-3997884	A	AGCTCGCG	AC=69;AF=0.486;AN=142;BaseQRankSum=-0.524;CSQ=GCTCGCG|upstream_gene_variant|MODIFIER||Zm00001d008284|Transcript|Zm00001d008284_T001|protein_coding|||||||||||1666|-1|||,GCTCGCG|upstream_gene_variant|MODIFIER||Zm00001d008284|Transcript|Zm00001d008284_T002|protein_coding|||||||||||1513|-1|||,GCTCGCG|5_prime_UTR_variant|MODIFIER||Zm00001d008284|Transcript|Zm00001d008284_T003|protein_coding|1/5||||87-…	./.	1/1	1/1	1/1	1/1	1/1	0/0	0/0	1/1	0/1	0/1	./.	0/0	./.	0/0	0/0	0/0	0/0	0/0	1/1	0/0	1/1	1/1	1/1	0/0	1/1	0/0	0/0	./.	./.	0/0	0/0	0/0	1/1	0/0	1/1	1/1	0/0	1/1	0/0	1/1	0/0	0/0	1/1
8	3997896	SNP-8-3997896	G	C	AC=16;AF=0.11;AN=146;CSQ=C|upstream_gene_variant|MODIFIER||Zm00001d008284|Transcript|Zm00001d008284_T001|protein_coding|||||||||||1678|-1|||,C|upstream_gene_variant|MODIFIER||Zm00001d008284|Transcript|Zm00001d008284_T002|protein_coding|||||||||||1525|-1|||,C|5_prime_UTR_variant|MODIFIER||Zm00001d008284|Transcript|Zm00001d008284_T003|protein_coding|1/5||||76|||||||-1|||,C|5_prime_UTR_variant|MODIF…	./.	0/0	0/0	0/0	0/0	0/0	0/0	0/0	0/0	0/0	0/0	./.	0/0	0/0	0/0	0/0	0/0	0/0	0/0	0/0	0/0	0/0	0/0	0/0	./.	0/0	0/0	0/0	1/1	./.	1/1	1/1	1/1	0/0	1/1	0/0	0/0	0/0	0/0	0/0	0/0	0/0	0/0	0/0
8	3997956	SNP-8-3997956	G	C	AC=72;AF=0.514;AN=140;BaseQRankSum=0;CSQ=C|upstream_gene_variant|MODIFIER||Zm00001d008284|Transcript|Zm00001d008284_T001|protein_coding|||||||||||1738|-1|||,C|upstream_gene_variant|MODIFIER||Zm00001d008284|Transcript|Zm00001d008284_T002|protein_coding|||||||||||1585|-1|||,C|5_prime_UTR_variant|MODIFIER||Zm00001d008284|Transcript|Zm00001d008284_T003|protein_coding|1/5||||16|||||||-1|||,C|5_prime_U…	1/1	1/1	1/1	1/1	1/1	1/1	./.	0/0	./.	0/1	0/1	./.	./.	1/1	0/0	0/0	0/0	0/0	1/1	1/1	0/0	1/1	./.	1/1	./.	1/1	0/0	0/0	0/0	1/1	0/0	0/0	0/0	1/1	0/0	1/1	1/1	0/0	1/1	0/0	1/1	0/0	0/0	1/1
8	3997967	SNP-8-3997967	C	T	AC=14;AF=0.091;AN=154;CSQ=T|upstream_gene_variant|MODIFIER||Zm00001d008284|Transcript|Zm00001d008284_T001|protein_coding|||||||||||1749|-1|||,T|upstream_gene_variant|MODIFIER||Zm00001d008284|Transcript|Zm00001d008284_T002|protein_coding|||||||||||1596|-1|||,T|5_prime_UTR_variant|MODIFIER||Zm00001d008284|Transcript|Zm00001d008284_T003|protein_coding|1/5||||5|||||||-1|||,T|5_prime_UTR_variant|MODIF…	0/0	0/0	0/0	0/0	0/0	0/0	0/0	0/0	0/0	0/0	0/0	0/0	./.	0/0	0/0	0/0	0/0	0/0	0/0	0/0	0/0	0/0	./.	0/0	0/0	0/0	0/0	0/0	1/1	0/0	1/1	1/1	1/1	0/0	1/1	0/0	0/0	0/0	0/0	0/0	0/0	0/0	0/0	0/0
8	3997979	SNP-8-3997979	A	G	AC=18;AF=0.129;AN=140;CSQ=G|upstream_gene_variant|MODIFIER||Zm00001d008284|Transcript|Zm00001d008284_T001|protein_coding|||||||||||1761|-1|||,G|upstream_gene_variant|MODIFIER||Zm00001d008284|Transcript|Zm00001d008284_T002|protein_coding|||||||||||1608|-1|||,G|upstream_gene_variant|MODIFIER||Zm00001d008284|Transcript|Zm00001d008284_T003|protein_coding|||||||||||8|-1|||,G|upstream_gene_variant|MODI…	0/0	0/0	0/0	0/0	0/0	0/0	0/0	0/0	0/0	0/0	0/0	0/0	./.	0/0	0/0	0/0	0/0	0/0	0/0	0/0	0/0	./.	./.	0/0	0/0	0/0	0/0	0/0	1/1	0/0	1/1	1/1	1/1	./.	1/1	0/0	0/0	0/0	0/0	0/0	0/0	0/0	1/1	0/0
8	3997979	SNP-8-3997979	A	G	AC=18;AF=0.129;AN=140;CSQ=G|upstream_gene_variant|MODIFIER||Zm00001d008284|Transcript|Zm00001d008284_T001|protein_coding|||||||||||1761|-1|||,G|upstream_gene_variant|MODIFIER||Zm00001d008284|Transcript|Zm00001d008284_T002|protein_coding|||||||||||1608|-1|||,G|upstream_gene_variant|MODIFIER||Zm00001d008284|Transcript|Zm00001d008284_T003|protein_coding|||||||||||8|-1|||,G|upstream_gene_variant|MODI…	0/0	0/0	0/0	0/0	0/0	0/0	0/0	0/0	0/0	0/0	0/0	0/0	./.	0/0	0/0	0/0	0/0	0/0	0/0	0/0	0/0	./.	./.	0/0	0/0	0/0	0/0	0/0	1/1	0/0	1/1	1/1	1/1	./.	1/1	0/0	0/0	0/0	0/0	0/0	0/0	0/0	1/1	0/0
8	3997997	DEL-8-3997997	CAGTCGTG	C	AC=18;AF=0.127;AN=142;CSQ=-|upstream_gene_variant|MODIFIER||Zm00001d008284|Transcript|Zm00001d008284_T001|protein_coding|||||||||||1780|-1|||,-|upstream_gene_variant|MODIFIER||Zm00001d008284|Transcript|Zm00001d008284_T002|protein_coding|||||||||||1627|-1|||,-|upstream_gene_variant|MODIFIER||Zm00001d008284|Transcript|Zm00001d008284_T003|protein_coding|||||||||||27|-1|||,-|upstream_gene_variant|MOD…	0/0	0/0	0/0	0/0	0/0	0/0	0/0	0/0	0/0	0/0	0/0	0/0	./.	0/0	0/0	0/0	0/0	0/0	0/0	0/0	0/0	./.	./.	0/0	0/0	0/0	0/0	0/0	1/1	0/0	1/1	1/1	1/1	./.	1/1	0/0	0/0	0/0	0/0	0/0	0/0	0/0	1/1	0/0
[truncated: 11 more rows]
[truncated: 33 more columns]
