# Supplementary figures and images for: Genome-wide association study reveals genetic basis and candidate genes for chlorophyll content of leaves in maize (Zea mays L.)
Source: PeerJ journal article supplement (doi:10.7717/peerj.18278), 2024-10-07

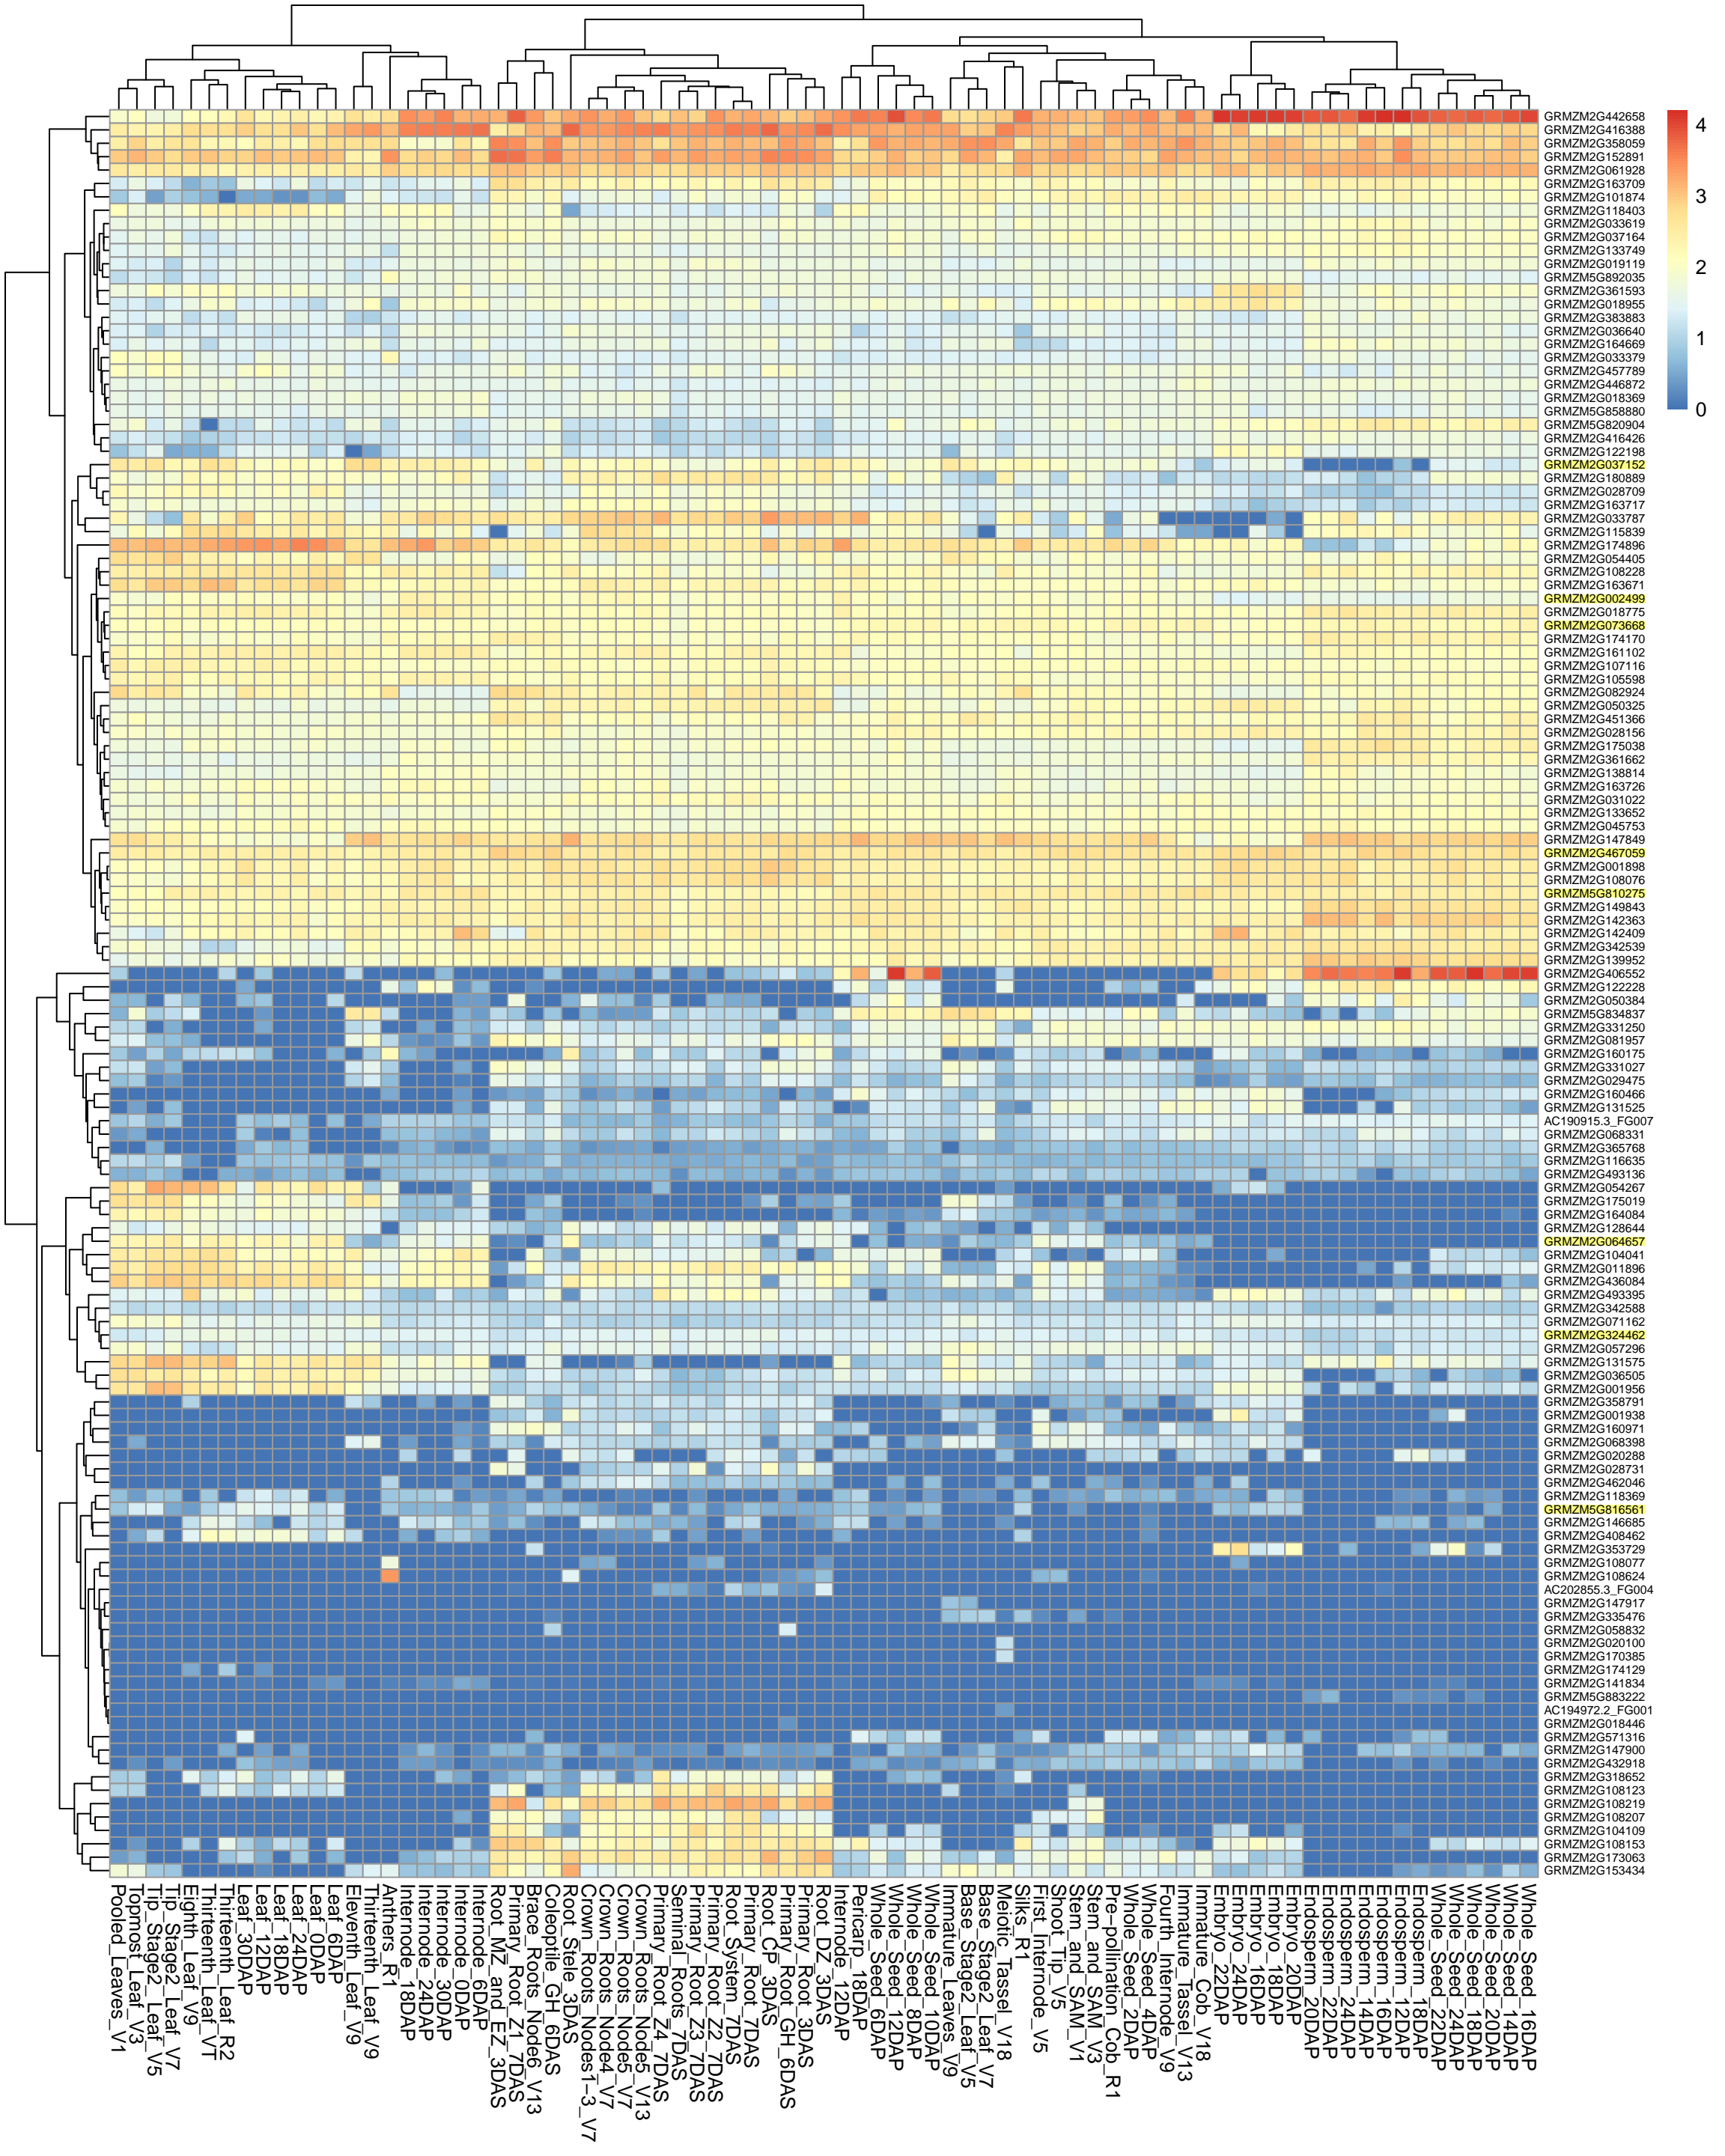

Supplement: Supplementary_Files.zip [file Supplementary_Files.zip]
